# Supplementary material
Source: PubMed Central journal article supplement (PMC8570559)

## Supporting Information

# Dissection of Alkylpyridinium Structures to Understand

## Deamination Reactions

Sergei Tcyrulnikov,<sup>†</sup> Qiuqi Cai,<sup>§</sup> J. Cameron Twitty,<sup>§</sup> Jianyu Xu,<sup>§</sup> Abderrahman Atifi,<sup>§</sup> Olivia P. Bercher,<sup>§</sup> Glenn P. A. Yap,<sup>§</sup> Joel Rosenthal,<sup>\*§</sup> Mary P. Watson,<sup>\*§</sup> Marisa C. Kozlowski<sup>\*†</sup>

<sup>†</sup> Department of Chemistry, Roy and Diana Vagelos Laboratories, University of Pennsylvania, Philadelphia, Pennsylvania 19104, United States

<sup>§</sup> Department of Chemistry and Biochemistry, University of Delaware, Newark, Delaware 19716, United States

\* [joelr@udel.edu](mailto:joelr@udel.edu), [mpwatson@udel.edu](mailto:mpwatson@udel.edu), [marisa@sas.upenn.edu](mailto:marisa@sas.upenn.edu)

|                                                                              |            |
|------------------------------------------------------------------------------|------------|
| <b>General Information - Synthesis</b> .....                                 | <b>S2</b>  |
| <b>Preparation of Alkylpyridinium Tetrafluoroborate Salts</b> .....          | <b>S3</b>  |
| General Procedure A: Preparation of Pyridinium Tetrafluoroborate Salts ..... | <b>S5</b>  |
| <b>General Information – Electrochemistry</b> .....                          | <b>S10</b> |
| <b>Crystal Structures of 1c-Cy and 1c-iPr</b> .....                          | <b>S14</b> |
| <b>Computational Details</b> .....                                           | <b>S17</b> |
| <b>Coordinates and Thermochemical Data</b> .....                             | <b>S19</b> |
| <b>Relative Contributions of Sterics and Electronics (Eq 3)</b> .....        | <b>S52</b> |
| <b>References</b> .....                                                      | <b>S53</b> |
| <b>Spectra</b> .....                                                         | <b>S55</b> |

## General Information - Synthesis

Reactions were performed in oven-dried Schlenk flasks or in oven-dried round-bottomed flasks unless otherwise noted. Round-bottomed flasks were fitted with rubber septa, and reactions were conducted under a positive pressure of  $N_2$ . Stainless steel syringes were used to transfer air- and moisture-sensitive liquids. Silica gel chromatography was performed on silica gel 60 (40-63  $\mu m$ , 60Å) unless otherwise noted. Commercial reagents were purchased from Sigma Aldrich, Acros, Fisher, Strem, TCI, Combi Blocks, Alfa Aesar, AK Scientific, Oakwood, or Cambridge Isotopes Laboratories and used as received with the following exceptions:  $CH_2Cl_2$  was dried by passing through drying columns.<sup>1</sup> Powdered, activated 4Å molecular sieves were prepared by heating sieves to  $\sim 200^\circ C$  under high vacuum overnight and then crushing to achieve a fine powder. In some instances, oven-dried potassium carbonate was added to  $CDCl_3$  to remove trace acid. Proton nuclear magnetic resonance ( $^1H$  NMR) spectra, carbon nuclear magnetic resonance ( $^{13}C$  NMR) spectra, and fluorine nuclear magnetic resonance spectra ( $^{19}F$  NMR) were recorded on both 400 MHz and 600 MHz spectrometers. Chemical shifts for protons are reported in parts per million downfield from tetramethylsilane and are referenced to residual protium in the NMR solvent ( $CHCl_3 = \delta 7.26$ ). Chemical shifts for carbon are reported in parts per million downfield from tetramethylsilane and are referenced to the carbon resonances of the solvent ( $CDCl_3 = \delta 77.16$ ). Chemical shifts for fluorine were externally referenced to  $CFCl_3$  in  $CDCl_3$  ( $CFCl_3 = \delta 0$ ). Data are represented as follows: chemical shift, multiplicity (br = broad, s = singlet, d = doublet, t = triplet, q = quartet, p = pentet, m = multiplet, dd = doublet of doublets), coupling constants in Hertz (Hz), integration. Infrared (IR) spectra were obtained using FTIR spectrophotometers with material loaded onto a KBr plate. The mass spectral data were obtained at the University of Delaware mass spectrometry facility. Melting points were taken on a Thomas-Hoover Uni-Melt Capillary Melting Point Apparatus.

## Preparation of Alkylpyridinium Tetrafluoroborate Salts

Pyridinium salts **1c-Cy** and **1c-i-Pr** were synthesized as described previously.<sup>2</sup> Pyridinium salts **1b-Cy** and **1d-Cy**–**1g-Cy** were synthesized according to General Procedure A. Pyridinium salts **1a-Cy** and **1n-Cy** were prepared as described below.

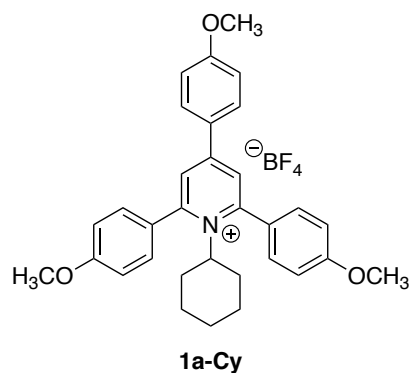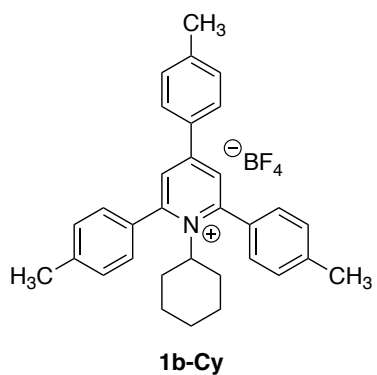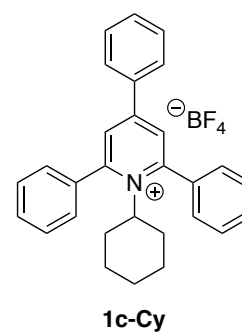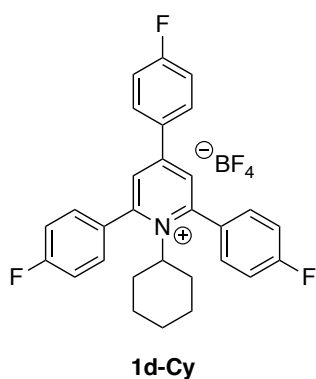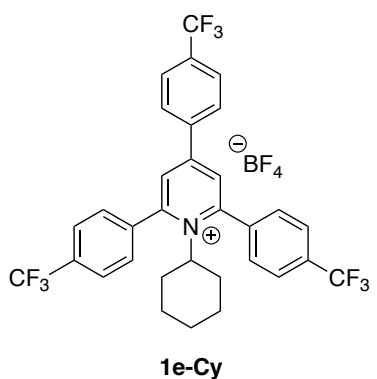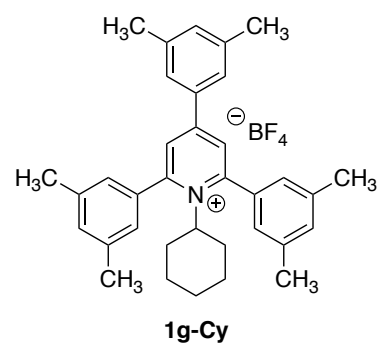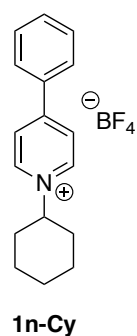

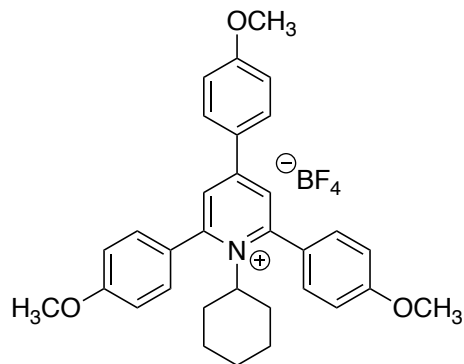

**1a-Cy**

**1-Cyclohexyl-2,4,6-tris(4-methoxyphenyl)pyridin-1-ium tetrafluoroborate (1a-Cy).** This procedure was adapted from Mouradzadegan and coworkers.<sup>3</sup> Under air, an oven-dried, round-bottomed flask was charged with a stir bar, 4-methoxybenzaldehyde (4.08 g, 30.0 mmol, 1.0 equiv), and 4'-methoxyacetophenone (9.01 g, 60.0 mmol, 2.0 equiv). As the solution was stirred, POCl<sub>3</sub> (25.0 mL, 270 mmol, 9.0 equiv) was added dropwise over 15 minutes, and the solution was then stirred at room temperature for an additional 15 minutes. A reflux condenser capped with a septum and a vent needle was attached, and the solution was then heated at 65 °C for 2 h. Then ethanol (30.0 mL, 1.0 M) and tetrafluoroboric acid (6.1 mL, 45.0 mmol, 1.5 equiv) were added sequentially. The mixture was then allowed to cool to room temperature and stirred at room temperature overnight. The product was precipitated by addition of Et<sub>2</sub>O (150 mL, ~5 times the mmol of aldehyde used). The resulting red solid pyrylium tetrafluoroborate salt was collected via filtration, washed with Et<sub>2</sub>O (3 x 25 mL), and dried under high vacuum to give the corresponding pyrylium salt (5.64 mg, 39%). The resulting pyrylium tetrafluoroborate salt was used directly without further purification.

This procedure was adapted from our previous work.<sup>2a</sup> Under air, commercially available cyclohexyl amine (0.70 mL, 6.00 mmol, 1.2 equiv) was added to a suspension of tris(4-methoxyphenyl)pyrylium tetrafluoroborate salt (2.43 g, 5.00 mmol, 1.0 equiv) and EtOH (5.0 mL, 1.0 M) in a round-bottomed flask. The flask was fitted with a reflux condenser capped with a septum with a vent needle. The mixture was stirred and heated at reflux in an oil bath at 80–85 °C overnight. The mixture was then allowed to cool to room temperature. The crude mixture was purified by silica gel chromatography (1–10% CH<sub>3</sub>OH in CH<sub>2</sub>Cl<sub>2</sub>) to give desired product **1a** (1.75 g, 62%) as an orange-red powder (mp 115–117 °C): <sup>1</sup>H NMR (600 MHz, CDCl<sub>3</sub>) δ 7.85 – 7.80 (m, 4H), 7.75 – 7.70 (m, 4H), 7.14 – 7.11 (m, 4H), 7.06 – 7.02 (m, 2H), 4.70 – 4.59 (m, 1H), 3.94 (s, 6H), 3.90 (s, 3H), 2.15 (d, *J* = 12.0 Hz, 2H), 1.67 – 1.60 (m, 2H), 1.60 – 1.50 (m, 2H), 1.41 (d, *J* = 13.3 Hz, 1H), 0.92 – 0.80 (m, 2H), 0.76 – 0.64 (m, 1H); <sup>13</sup>C NMR (151 MHz, CDCl<sub>3</sub>) δ 163.4, 161.5, 157.4, 153.8, 131.3, 130.2, 126.9, 126.4, 125.8, 115.4, 114.4, 71.9, 55.8, 55.7, 34.1, 26.8, 24.9; <sup>19</sup>F NMR (565 MHz, CDCl<sub>3</sub>) δ –153.51 (minor, <sup>11</sup>BF<sub>4</sub>), –153.56 (major, <sup>10</sup>BF<sub>4</sub>); FTIR (neat) 2937, 1597, 1576, 1510, 1457, 1296, 1247, 1181, 1025, 836; HRMS (ESI+) [M-BF<sub>4</sub>]<sup>+</sup> calculated for C<sub>32</sub>H<sub>34</sub>NO<sub>3</sub>: 480.2533, found 480.2525.

## General Procedure A: Preparation of Pyridinium Tetrafluoroborate Salts

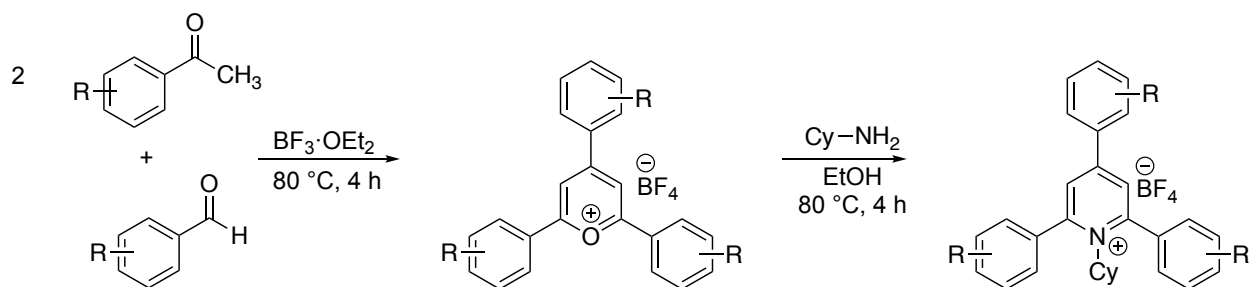

This procedure was adapted from Spokoyny and coworkers.<sup>4</sup> An oven-dried, round-bottomed flask was charged with a stir bar, the corresponding benzaldehyde (1.0 equiv), and the corresponding acetophenone (2.0 equiv). Toluene was used as solvent (1.0 M) for solid acetophenones. BF<sub>3</sub>·Et<sub>2</sub>O (2.4 equiv) was added dropwise with stirring. The mixture was heated to 80 °C with a vent needle in the septum for 4 hours. The mixture was then allowed to cool to room temperature. The product was precipitated by addition of Et<sub>2</sub>O (mL = ~5 times the number of mmol of aldehyde used). The resulting solid pyrylium salt was collected via filtration and washed with Et<sub>2</sub>O (3 x 25 mL), dried under high vacuum, and used directly without any further purification.

This procedure was adapted from our previous work.<sup>5</sup> Commercially available cyclohexyl amine (1.0 equiv) was added to a suspension of the corresponding pyrylium tetrafluoroborate (1.0 equiv), powdered activated 4Å molecular sieves (~500 mg/mmol), and CH<sub>2</sub>Cl<sub>2</sub> (0.5 M) in a round-bottomed flask equipped with a stir bar. The flask was fitted with a septum and a vent needle. The mixture was stirred as Et<sub>3</sub>N (1.0 equiv for free base amines; 2.0 equiv for amine hydrochloride salts) was added by syringe. The vent needle was removed, and the mixture was stirred at rt for 30 min. The vent needle was reinserted before the addition of acetic acid (2.0 equiv). The needle was again removed, and the mixture was stirred at rt overnight. The mixture was then filtered through a short pad of Celite using CH<sub>2</sub>Cl<sub>2</sub> to rinse the flask and Celite pad. The filtrate was then washed with distilled H<sub>2</sub>O (1 x 30 mL), and sat. NaCl (2 x 30 mL), dried (NaSO<sub>4</sub>), filtered, and concentrated. Et<sub>2</sub>O (ca. 100 mL) was added to the solid to precipitate the pyridinium salt, which was then isolated by filtration. If the salt still did not precipitate, it was purified by silica gel chromatography with acetone/CH<sub>2</sub>Cl<sub>2</sub> as the eluent.

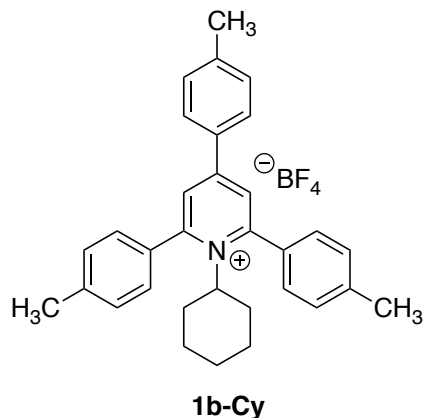

**1-Cyclohexyl-2,4,6-tri-*p*-tolylpyridin-1-ium tetrafluoroborate (1b-Cy).** Prepared via General Procedure A on a 20.0 mmol scale using the 4-methylbenzaldehyde (2.4 mL, 20.0 mmol, 1.0 equiv), 4-methylacetophenone (5.3 mL, 40.0 mmol, 2.0 equiv), and boron trifluoride diethyl etherate (5.9 mL, 48.0 mmol, 2.4 equiv) to give the corresponding pyrylium salt as a yellow solid (3.64 g, 8.31 mmol, 42%).

The pyrylium salt (2.0 mmol) was used directly without further purification to generate pyridinium salt **1b-Cy** following General Procedure A. The crude mixture was purified by silica gel chromatography (2–25% acetone in CH<sub>2</sub>Cl<sub>2</sub>) to give the desired product **1b-Cy** (482 mg, 0.928 mmol, 19%) as a light green crystalline solid (mp 131–136 °C): <sup>1</sup>H NMR (600 MHz, CDCl<sub>3</sub>) δ 7.76 (s, 2H), 7.65 (d, *J* = 8.2 Hz, 2H), 7.58 (d, *J* = 8.0 Hz, 4H), 7.37 (d, *J* = 7.9 Hz, 4H), 7.28 (d, *J* = 8.1 Hz, 2H), 4.66–4.58 (m, 1H), 2.48 (s, 6H), 2.39 (s, 3H), 2.08 (d, *J* = 11.7 Hz, 2H), 1.59 (d, *J* = 13.8 Hz, 2H), 1.56–1.47 (m, 2H), 1.36 (d, *J* = 13.1 Hz, 1H), 0.84–0.74 (m, 2H), 0.69–0.59 (m, 1H); <sup>13</sup>C NMR (151 MHz, CDCl<sub>3</sub>) δ 157.5, 154.7, 143.0, 141.3, 131.4, 131.2, 130.5, 129.6, 129.4, 128.3, 127.7, 71.8, 33.8, 26.6, 24.8, 21.7, 21.6; <sup>19</sup>F NMR (565 MHz, CDCl<sub>3</sub>) δ –153.60 (minor, <sup>11</sup>BF<sub>4</sub>), –153.66 (major, <sup>10</sup>BF<sub>4</sub>); FTIR (neat) 2932, 1620, 1559, 1512, 1140, 1056, 825, 732; HRMS (ESI+) [M–BF<sub>4</sub>]<sup>+</sup> calculated for C<sub>32</sub>H<sub>34</sub>N: 432.2686, found 432.2689.

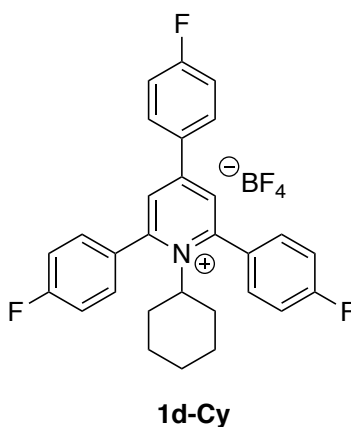

**1-Cyclohexyl-2,4,6-tris(4-fluorophenyl)pyridin-1-ium tetrafluoroborate (1d-Cy).** Prepared via General Procedure A on a 10.0 mmol scale using the 4-fluorobenzaldehyde (1.1 mL, 10.0 mmol, 1.0 equiv), 4-fluoroacetophenone (2.4 mL, 20.0 mmol, 2.0 equiv) and boron trifluoride

diethyl etherate (3.0 mL, 24.0 mmol, 2.4 equiv) to give the corresponding pyrylium salt as a yellow solid (1.89 g, 4.19 mmol, 42%).

The pyrylium salt (2.0 mmol) was used directly without further purification to generate pyridinium salt **1d-Cy** following General Procedure A. The crude mixture was purified by silica gel chromatography (2–25% acetone in CH<sub>2</sub>Cl<sub>2</sub>) to give the desired product **1d-Cy** (284 mg, 0.535 mmol, 27%) as an orange powder (mp 126–130 °C): <sup>1</sup>H NMR (600 MHz, CDCl<sub>3</sub>) δ 7.80 – 7.70 (m, 8H), 7.30 – 7.23 (m, 4H), 7.19 – 7.12 (m, 2H), 4.61 – 4.49 (m, 1H), 2.11 (d, *J* = 11.7 Hz, 2H), 1.61 (d, *J* = 13.6 Hz, 2H), 1.49 – 1.36 (m, 3H), 0.86 – 0.73 (m, 2H), 0.72 – 0.60 (m, 1H); <sup>13</sup>C NMR (151 MHz, CDCl<sub>3</sub>) δ 165.3 (d, *J*<sub>C-F</sub> = 254.5 Hz), 164.1 (d, *J*<sub>C-F</sub> = 253.2 Hz), 156.5, 154.3, 131.8, 130.8, 130.7, 130.3 (d, *J*<sub>C-F</sub> = 3.2 Hz), 130.1 (d, *J*<sub>C-F</sub> = 3.7 Hz), 128.6, 117.1 (d, *J*<sub>C-F</sub> = 22.2 Hz), 116.3 (d, *J*<sub>C-F</sub> = 22.0 Hz), 72.2, 33.8, 26.7, 24.8; <sup>19</sup>F NMR (565 MHz, CDCl<sub>3</sub>) δ –106.79, –107.85, –152.85 (minor, <sup>11</sup>BF<sub>4</sub>), –152.90 (major, <sup>10</sup>BF<sub>4</sub>); FTIR (neat) 2935, 1622, 1601, 1509, 1236, 1163, 1140, 1055, 841, 545; HRMS (ESI<sup>+</sup>) [M–BF<sub>4</sub>]<sup>+</sup> calculated for C<sub>29</sub>H<sub>25</sub>F<sub>3</sub>N: 444.1934, found 444.1939.

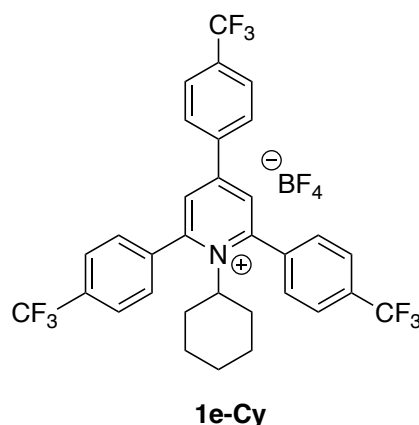

**1-Cyclohexyl-2,4,6-tris(4-(trifluoromethyl)phenyl)pyridin-1-ium tetrafluoroborate (1e-Cy).** Prepared via General Procedure A on a 20.0 mmol scale using the 4-trifluoromethylbenzaldehyde (2.7 mL, 20.0 mmol, 1.0 equiv), 4-trifluoromethylacetophenone (8.2 mL, 40.0 mmol, 2.0 equiv), and boron trifluoride diethyl etherate (5.9 mL, 48.0 mmol, 2.4 equiv) to give the corresponding pyrylium salt as a yellow solid (2.82 g, 4.70 mmol, 23%).

The pyrylium (2.0 mmol) was used directly without further purification following General Procedure A to give the desired product **1e** (1.34 g, 98%) as a white powder without purification (mp 177–179 °C): <sup>1</sup>H NMR (600 MHz, CDCl<sub>3</sub>) δ 7.93 (d, *J* = 7.9 Hz, 4H), 7.82 (t, *J* = 6.8 Hz, 6H), 7.76 (s, 2H), 7.66 (d, *J* = 8.1 Hz, 2H), 4.60 – 4.44 (m, 1H), 2.18 (d, *J* = 11.3 Hz, 2H), 1.60 (d, *J* = 13.2 Hz, 2H), 1.47 – 1.34 (m, 3H), 0.81 – 0.69 (m, 2H), 0.67 – 0.57 (m, 1H); <sup>13</sup>C NMR (151 MHz, CDCl<sub>3</sub>) δ 156.1, 154.5, 137.7, 137.3, 133.4 (q, *J*<sub>C-F</sub> = 33.0 Hz), 130.3, 129.4, 129.0, 126.5 (q, *J*<sub>C-F</sub> = 3.7 Hz), 126.0, 123.6 (q, *J*<sub>C-F</sub> = 272.8 Hz), 123.5 (q, *J*<sub>C-F</sub> = 272.8 Hz), 73.0, 33.7, 26.6, 24.6; <sup>19</sup>F NMR (565 MHz, CDCl<sub>3</sub>) δ –63.09, –63.18, –152.36 (minor, <sup>11</sup>BF<sub>4</sub>), –152.41 (major, <sup>10</sup>BF<sub>4</sub>); FTIR (neat) 2941, 1628, 1615, 1566, 1409, 1324, 1172, 1131, 1055, 1020, 842, 733, 611; HRMS (ESI<sup>+</sup>) [M–BF<sub>4</sub>]<sup>+</sup> calculated for C<sub>32</sub>H<sub>25</sub>F<sub>9</sub>N: 594.1838, found 594.1825.

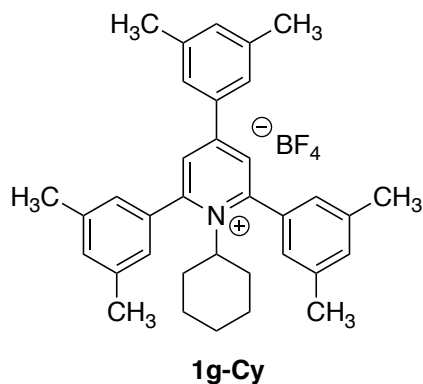

**1-Cyclohexyl-2,4,6-tris(3,5-dimethylphenyl)pyridin-1-ium tetrafluoroborate (1g-Cy).** Prepared via General Procedure A on a 10.0 mmol scale using the 3,5-dimethylbenzaldehyde (1.3 mL, 10.0 mmol, 1.0 equiv), 3,5-dimethylacetophenone (3.0 mL, 20.0 mmol, 2.0 equiv), and boron trifluoride diethyl etherate (3.0 mL, 24.0 mmol, 2.4 equiv) to give the corresponding pyrylium salt as a yellow solid (1.47 g, 3.05 mmol, 31%).

The pyrylium salt (2.0 mmol) was used directly without further purification to generate pyridinium salt **1g-Cy** following General Procedure A. The crude mixture was purified by silica gel chromatography (2–25% acetone in CH<sub>2</sub>Cl<sub>2</sub>) to give the desired product **1g-Cy** (756 mg, 67%) as a white powder (mp 190–192 °C): <sup>1</sup>H NMR (400 MHz, CDCl<sub>3</sub>) δ 7.79 (s, 2H), 7.39 (s, 2H), 7.31 (s, 4H), 7.22 (s, 2H), 7.15 (s, 1H), 4.63 (dd, *J* = 13.4, 10.6 Hz, 1H), 2.43 (s, 12H), 2.36 (s, 6H), 2.11 (d, *J* = 11.9 Hz, 2H), 1.71 – 1.46 (m, 4H), 1.38 (d, *J* = 13.0 Hz, 1H), 0.88 – 0.74 (m, 2H), 0.73 – 0.63 (m, 1H); <sup>13</sup>C NMR (101 MHz, CDCl<sub>3</sub>) δ 157.5, 155.0, 139.5, 138.8, 134.1, 133.9, 133.8, 132.5, 127.7, 127.1, 126.1, 72.0, 34.0, 26.7, 24.9, 21.5, 21.4; <sup>19</sup>F NMR (376 MHz, CDCl<sub>3</sub>) δ –153.50 (minor, <sup>11</sup>BF<sub>4</sub>), –153.55 (major, <sup>10</sup>BF<sub>4</sub>); FTIR (neat) 2923, 1620, 1599, 1563, 1447, 1055, 851, 730, 711; HRMS (ESI+) [M–BF<sub>4</sub>]<sup>+</sup> calculated for C<sub>35</sub>H<sub>40</sub>N: 474.3155, found 474.3151.

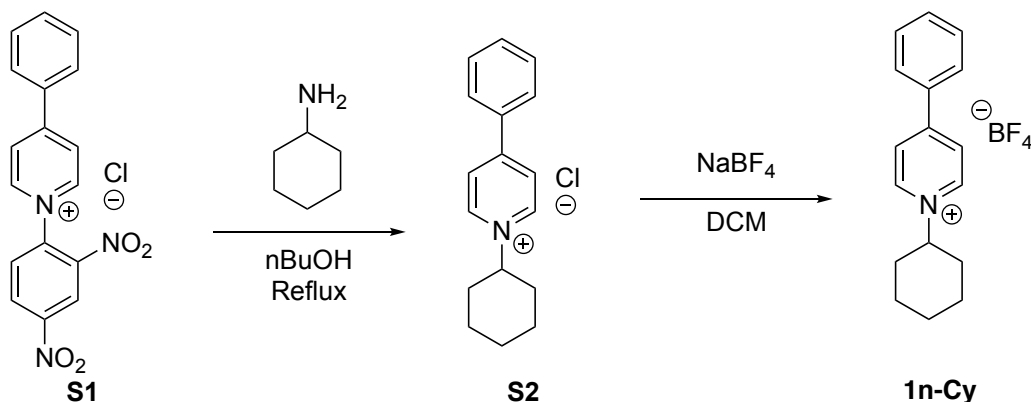

**1-Cyclohexyl-4-phenylpyridin-1-ium tetrafluoroborate (1n-Cy).** 4-Phenyl Zincke salt **S1** was prepared according to literature procedure.<sup>6</sup> The procedure to generate 1-cyclohexyl-4-phenylpyridin-1-ium chloride (**S2**) was adapted from Castagnoli and coworkers.<sup>7</sup> Under air, a 50 mL, round-bottomed flask was charged with a stir bar and 4-phenyl Zincke salt **S1** (3.57 g, 10.0 mmol, 1.0 equiv). 1-Butanol (20 mL, 0.5 M) was added, followed by cyclohexylamine (1.4 mL, 12.0 mmol, 1.2 equiv). A reflux condenser capped with a septum and vent needle



was attached, and the dark red solution was heated at 120 °C for 30 h. The mixture was then allowed to cool to room temperature. The product was precipitated with Et<sub>2</sub>O and stored in the freezer overnight to promote crystallization. The resulting tan solid was collected via filtration and washed with EtOAc until the filtrate was colorless. The solid was then washed with Et<sub>2</sub>O to remove EtOAc, collected, and dried under vacuum to give 1-cyclohexyl-4-phenyl-pyridin-1-ium chloride **S2** (2.65 g, 9.68 mmol, 97%) as a tan solid. Chloride **S2** was used without further purification.

To a separatory funnel was added 1-cyclohexyl-4-phenyl-pyridin-1-ium chloride **S2** (820 mg, 3.0 mmol, 1.0 equiv), and CH<sub>2</sub>Cl<sub>2</sub> (50 mL). This mixture was washed with sat. aqueous sodium tetrafluoroborate (50 mL x 4) and then sat. aqueous sodium chloride (50 mL x 2), dried over MgSO<sub>4</sub>, filtered, and concentrated under reduced pressure to give pyridinium salt **1n-Cy** (782 mg, 2.40 mmol, 80%) as a yellow solid (mp 130–132 °C): <sup>1</sup>H NMR (400 MHz, CDCl<sub>3</sub>) δ 8.92 (d, *J* = 6.2 Hz, 2H), 8.22 (d, *J* = 6.0 Hz, 2H), 7.83 – 7.74 (m, 2H), 7.61 – 7.49 (m, 2H), 4.66 – 4.51 (m, 1H), 2.22 (d, *J* = 11.3 Hz, 2H), 1.99 – 1.83 (m, 4H), 1.74 (d, *J* = 13.5 Hz, 1H), 1.60 – 1.46 (m, 2H), 1.37 – 1.21 (m, 1H); <sup>13</sup>C NMR (101 MHz, CDCl<sub>3</sub>) δ 156.9, 143.0, 133.7, 132.5, 130.1, 128.0, 125.5, 71.6, 33.7, 25.3, 24.5; <sup>19</sup>F NMR (376 MHz, CDCl<sub>3</sub>) δ –151.6 (minor, <sup>11</sup>BF<sub>4</sub>), –151.7 (major, <sup>10</sup>BF<sub>4</sub>); FTIR (neat) 2944, 2862, 1638, 1440, 1161, 1062, 854, 778, 729, 695; HRMS (ESI+) [M–BF<sub>4</sub>]<sup>+</sup> calculated for C<sub>17</sub>H<sub>20</sub>N: 238.1596, found 238.1587.

## General Information – Electrochemistry

**Materials.** Tetrabutylammonium hexafluorophosphate (TBAPF<sub>6</sub>) was purchased from Tokyo Chemical Industry Co. LTD, recrystallized from ethyl alcohol, and dried under vacuum at 40 °C for at least one week prior to use. Solvents for electrochemistry were of reagent grade or better and were dried by passage through activated alumina and then stored over 4 Å molecular sieves prior to use.

**Cyclic voltammetry (CV) and differential pulse voltammetry (DPV)** Experiments were performed using a CHI-620D potentiostat/galvanostat using a standard three-electrode configuration. The working electrode was a polished glassy carbon electrode (GCE, 3.0 mm diameter, CH Instruments) and the auxiliary electrode was a piece of platinum gauze. Electrochemical potentials were measured against a silver wire pseudo reference, unless otherwise noted, with an internal ferrocene standard. Reported electrochemistry data are calibrated and reported versus the Fc/Fc<sup>+</sup> couple. The supporting electrolyte employed for CV and DPV experiments was 0.1 M tetrabutylammonium hexafluorophosphate (TBAPF<sub>6</sub>), dissolved in dry N,N-Dimethylformamide. The analyte concentration was 1.0 mM, and all CV experiments were carried out varying scan rates of  $\nu = 5, 10, 25, 50, 75, 100, 250, 500, 750$  and 1000 mV/s unless otherwise noted. For the scan rate experiments, data were collected from the fastest scan rate to the slowest scan rate. Before starting a new CV experiment, the solution was stirred at least 30 seconds to ensure complete homogeneity at the electrode/electrolyte interface and then allowed to rest for at least two minutes to ensure voltammetry was performed on quiescent solutions. All the CV and DPV experiments were performed under an inert atmosphere of N<sub>2</sub>.

### *Voltammetric Simulations*

Electrochemical simulation of voltammetric traces were carried out using DigiElch (ElchSoft) software. Simulated voltammograms were fitted to experimental traces using a planar semi-infinite diffusion. For all simulations, the following parameters were applied: electrode area ( $A = 0.07 \text{ cm}^2$ ); temperature ( $T = 298 \text{ K}$ ); analyte concentration ( $[C] = 1.0 \text{ mM}$ ), diffusion coefficient ( $D = 10^{-5} \text{ cm}^2\text{s}^{-1}$ ); transfer coefficient ( $\alpha = 0.5$ ). Uncompensated resistance ( $R_u$ ), with values ranging from 20 to 200  $\Omega$ , was obtained from experimental data and included in the simulation. An average double layer capacitance ( $C_{dl} = 3 \text{ }\mu\text{F}$ ) was applied during the voltammetric simulation. Using all these input parameters, the experimental voltammograms were fitted to an EC mechanism involving a reversible electron transfer step followed by a chemical step, as follow:

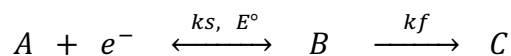

Using the implemented iterative non-linear least squares fitting algorithm, very good fittings were achieved for all experimental voltammograms. The fitting procedure was simultaneously applied to multiple voltammograms acquired at different scan rates. Optimal values for the output parameters, including the standard redox potentials ( $E^\circ$ ), the heterogenous rate constant for SET ( $k_s$ ), and the forward chemical rate constant ( $k_f$ ) were obtained.

The values extracted from these simulations are shown in the table below, and are based on data displayed in the DPV and CVs of variable scan rate shown over the next 3 pages.

| Entry | Compound     | $E^{\circ}$ (V vs Fc/Fc <sup>+</sup> ) | $k_f$ (s <sup>-1</sup> ) |
|-------|--------------|----------------------------------------|--------------------------|
| 1     | <b>1a-Cy</b> | -1.415 ( $\pm$ 0.003)                  | 0.39 ( $\pm$ 0.04)       |
| 2     | <b>1b-Cy</b> | -1.372 ( $\pm$ 0.005)                  | 0.20 ( $\pm$ 0.05)       |
| 3     | <b>1c-Cy</b> | -1.341 ( $\pm$ 0.003)                  | 0.10 ( $\pm$ 0.04)       |
| 4     | <b>1d-Cy</b> | -1.296 ( $\pm$ 0.007)                  | 0.17 ( $\pm$ 0.02)       |
| 5     | <b>1e-Cy</b> | -1.102 ( $\pm$ 0.005)                  | 0.07 ( $\pm$ 0.06)       |
| 6     | <b>1g-Cy</b> | -1.371 ( $\pm$ 0.010)                  | 0.13 ( $\pm$ 0.04)       |

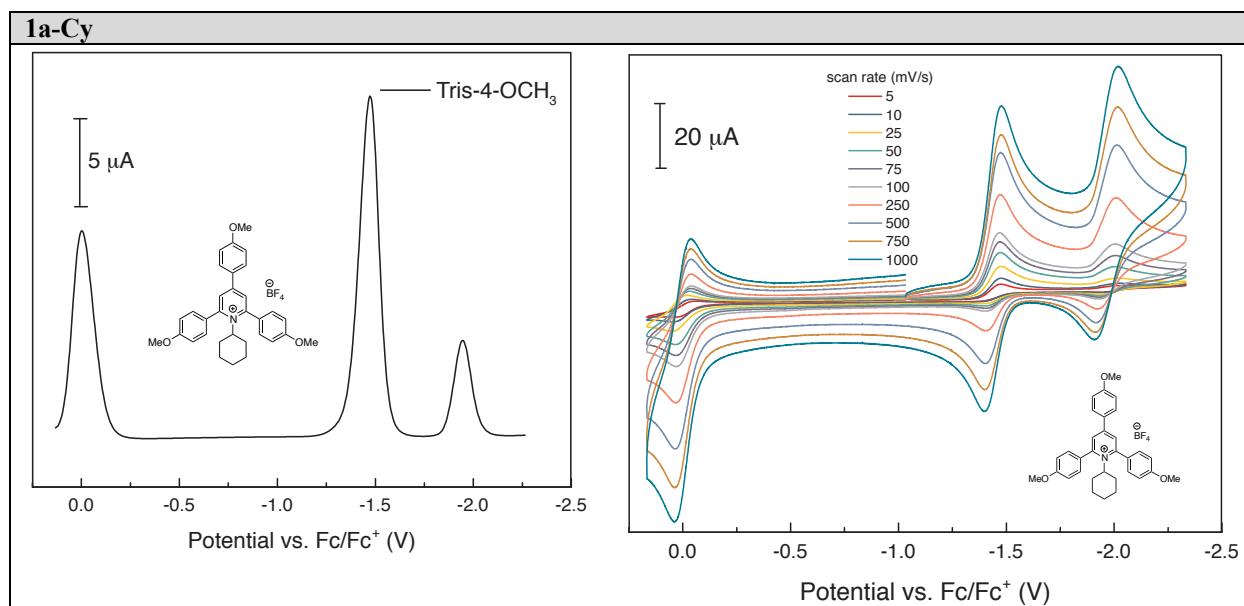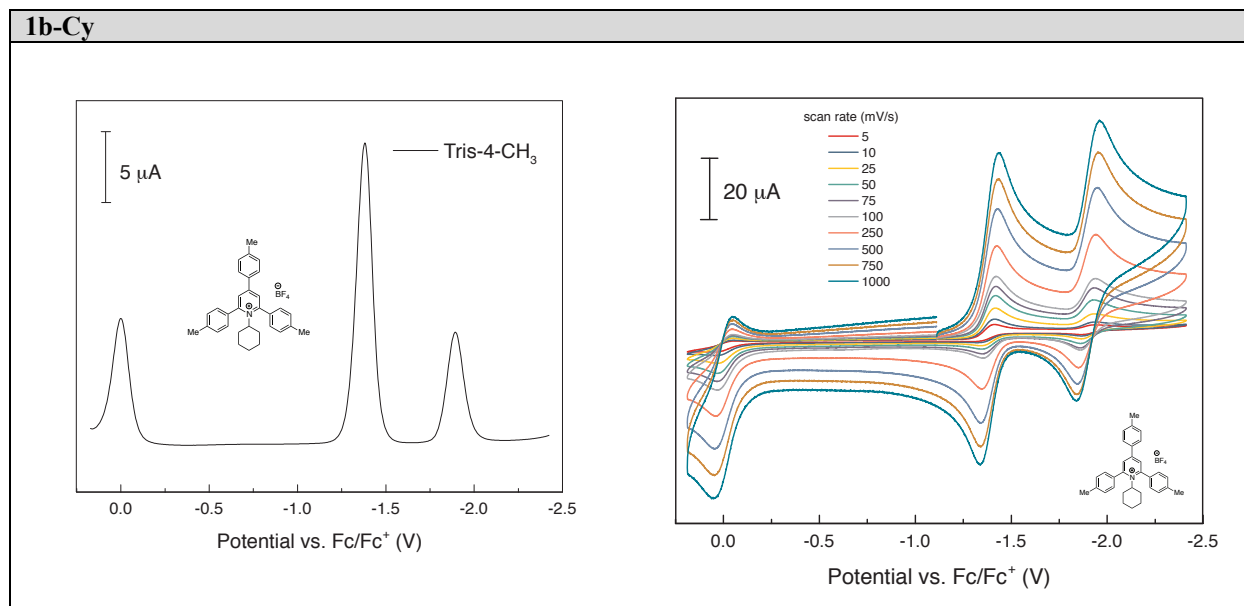

### 1c-Cy

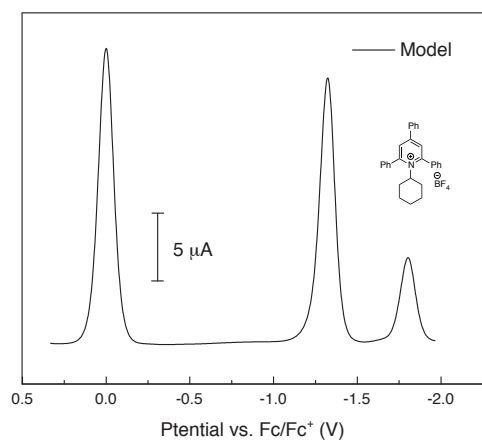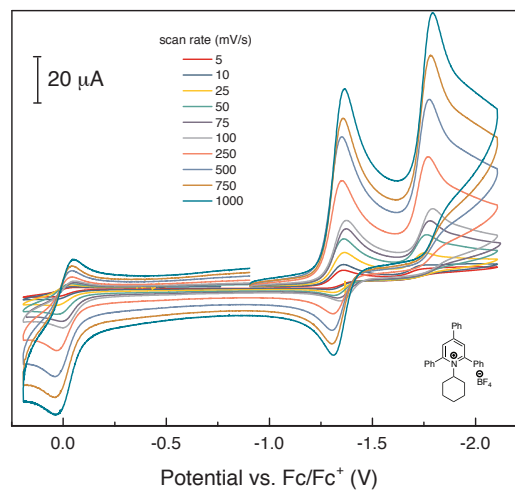

### 1d-Cy

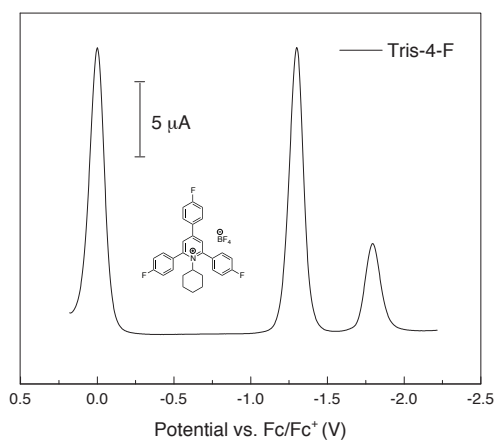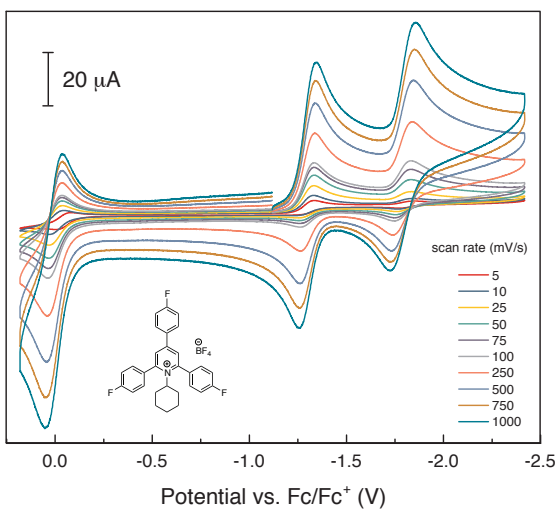

### 1e-Cy

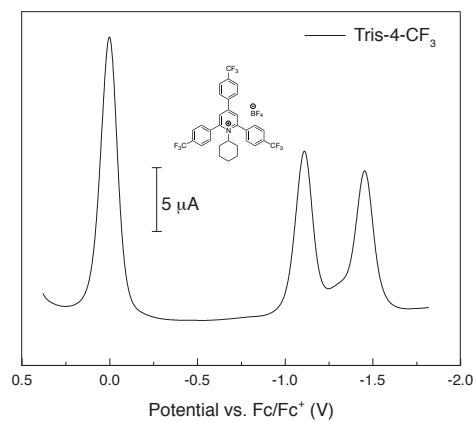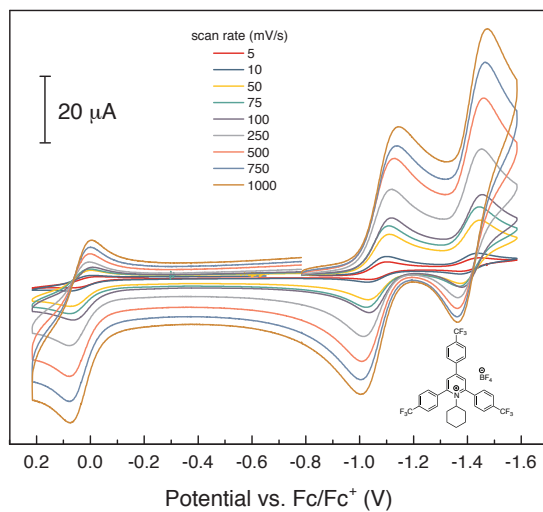

### 1g-Cy

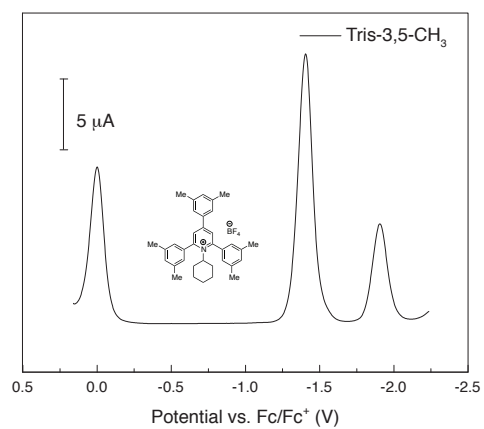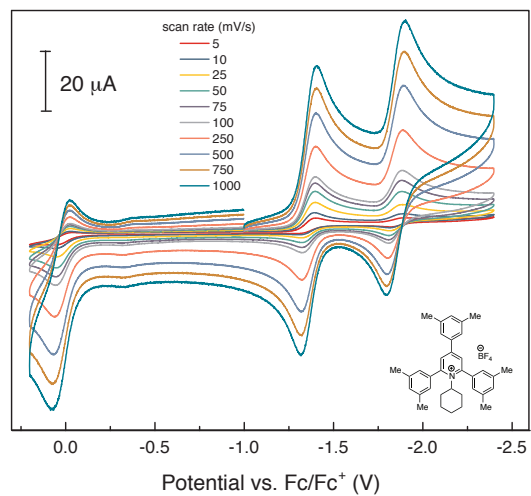

## Crystal Structures of **1c-Cy** and **1c-i-Pr**

X-ray structural analysis for **1c-Cy·0.5CH<sub>2</sub>Cl<sub>2</sub>** and **1c-i-Pr**: X-ray quality crystals of **1c-Cy·0.5CH<sub>2</sub>Cl<sub>2</sub>** and **1c-i-Pr** were obtained from slow evaporation from CH<sub>2</sub>Cl<sub>2</sub>/hexanes. Suitable crystals were selected under polarized light, mounted using viscous oil onto a plastic mesh and cooled to the data collection temperature. Data were collected on a Bruker-AXS APEX II DUO CCD diffractometer with graphite-monochromated Mo-K $\alpha$  radiation ( $\lambda = 0.71073$  Å). Unit cell parameters were obtained from 48 data frames,  $0.5^\circ$   $\omega$ , from three different sections of the Ewald sphere. The unit-cell dimensions, equivalent reflections and systematic absences in the diffraction data are consistent, uniquely, with  $P2_1/n$  for **1c-Cy·0.5CH<sub>2</sub>Cl<sub>2</sub>**, and with  $Cc$  and  $C2/c$  for **1c-i-Pr**. Refinement in the centrosymmetric space group option for **1c-i-Pr**,  $C2/c$ , yielded chemically reasonable and computationally stable results of refinement. The data were treated with multi-scan absorption corrections.<sup>8</sup> Structures were solved using intrinsic phasing methods<sup>9</sup> and refined with full-matrix, least-squares procedures on  $F^2$ .<sup>10</sup>

Three-dimensional rigid bond restraints on anisotropic displacement parameters and geometrical restraints were applied to a dichloromethane solvent, located at an inversion center, in **1c-Cy·0.5CH<sub>2</sub>Cl<sub>2</sub>**. A disordered BF<sub>4</sub><sup>-</sup> anion, treated with geometrical restraints, was located in **1c-Cy·0.5CH<sub>2</sub>Cl<sub>2</sub>** with chemically equivalent atoms in the disordered contributions restrained to equal anisotropic displacement parameters with a refined site occupancy ratio of 53/47.

Three-dimensional rigid bond restraints on anisotropic displacement parameters and geometrical restraints were applied to the BF<sub>4</sub><sup>-</sup> in **1c-i-Pr**. Two fluorine atoms in the BF<sub>4</sub><sup>-</sup> counterion of **1c-i-Pr** were found disordered in two positions with a refined site occupancy of 62/38. The two methyl groups of the isopropyl moiety were found disordered over six positions, restrained to equal atomic displacement parameters, with the total occupancy restrained to two, constrained with equal C<sub>Me</sub>-C<sub>iPr</sub>, with refined occupancies of 55/54/48/17/14/12. Since the methyl positions cannot be assigned pairwise, the disordered positions of the isopropyl proton cannot be calculated and were ignored.

Non-hydrogen atoms were refined with anisotropic displacement parameters. Hydrogen atoms, excepting the isopropyl proton in **1c-i-Pr**, were treated as idealized contributions with geometrically calculated positions and with  $U_{iso}$  equal to  $1.2 U_{eq}$  of the attached atom. Atomic scattering factors are contained in the SHELXTL program library.<sup>10</sup> The CIF has been deposited at the Cambridge Structural Database under CCDC 2044313 and 2044314.

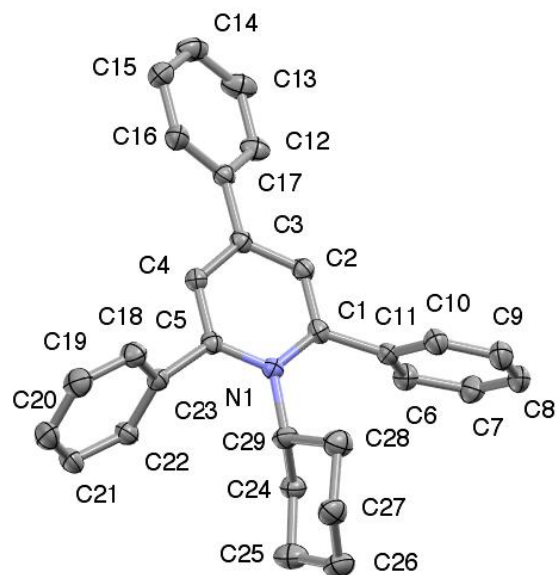

**Figure S1.** Molecular diagram of the cation in **1c-Cy**·**0.5CH<sub>2</sub>Cl<sub>2</sub>**. H-atoms and solvent atoms omitted for clarity. Ellipsoids are depicted at 50% probability.

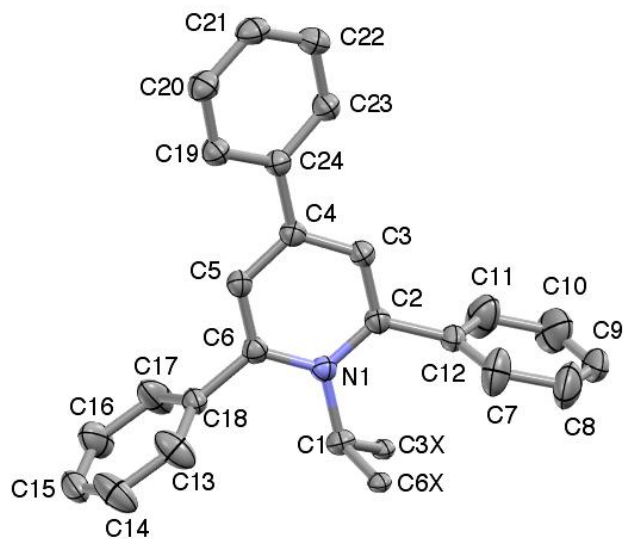

**Figure S2.** Molecular diagram of the cation in **1c-i-Pr**. H-atoms and minor disordered components omitted for clarity. Ellipsoids are depicted at 50% probability.

**Table S1.** Crystal data and structure refinement details.

| Compound                               | <b>1c-Cy·0.5CH<sub>2</sub>Cl<sub>2</sub></b>                                               | <b>1c-i-Pr</b>                                     |
|----------------------------------------|--------------------------------------------------------------------------------------------|----------------------------------------------------|
| Sum Formula                            | C <sub>29.5</sub> H <sub>28</sub> BClF <sub>4</sub> N                                      | C <sub>26</sub> H <sub>24</sub> BF <sub>4</sub> N  |
| Moiety Formula                         | C <sub>29</sub> H <sub>28</sub> N, BF <sub>4</sub> , 0.5(CH <sub>2</sub> Cl <sub>2</sub> ) | C <sub>26</sub> H <sub>24</sub> N, BF <sub>4</sub> |
| Formula Weight, g/mol                  | 519.80                                                                                     | 437.27                                             |
| Temperature, K                         | 150(2)                                                                                     | 200(2)                                             |
| Crystal system                         | monoclinic                                                                                 | monoclinic                                         |
| Space group                            | <i>P</i> 2 <sub>1</sub> / <i>n</i>                                                         | <i>C</i> 2/ <i>c</i>                               |
| Cell dimensions                        |                                                                                            |                                                    |
| <i>a</i> , Å                           | 12.0877(17)                                                                                | 16.0554(9)                                         |
| <i>b</i> , Å                           | 16.723(2)                                                                                  | 18.7683(11)                                        |
| <i>c</i> , Å                           | 12.6075(17)                                                                                | 15.4095(9)                                         |
| α, °                                   | 90                                                                                         | 90                                                 |
| β, °                                   | 92.228(2)                                                                                  | 105.7110(8)                                        |
| γ, °                                   | 90                                                                                         | 90                                                 |
| Volume, Å <sup>3</sup>                 | 2546.6(6)                                                                                  | 4469.9(4)                                          |
| <i>Z</i>                               | 4                                                                                          | 8                                                  |
| ρ <sub>calc</sub> , g/cm <sup>3</sup>  | 1.356                                                                                      | 1.300                                              |
| μ/mm <sup>-1</sup>                     | 0.199                                                                                      | 0.098                                              |
| F(000)                                 | 1084                                                                                       | 1824                                               |
| Reflections collected                  | 28645                                                                                      | 25265                                              |
| Independent reflections                | 5857                                                                                       | 5107                                               |
| Data/restraints/parameters             | 5857 / 116 / 359                                                                           | 5107 / 67 / 326                                    |
| Goodness-of-fit                        | 1.020                                                                                      | 1.074                                              |
| R [ <i>I</i> ≥ 2σ ( <i>I</i> )] R1/wR2 | 0.0790/0.2108                                                                              | 0.0860/0.2482                                      |
| R indexes [all data] R1/wR2            | 0.1147/0.2421                                                                              | 0.0931/0.2569                                      |
| CCDC                                   | 2044313                                                                                    | 2044314                                            |



## Computational Details

Optimizations of intermediates and transition states were performed using Gaussian 09<sup>11</sup> software with spin-unrestricted DFT using the B3LYP functional<sup>12</sup> and a 6-31G(d) basis set in the gas phase. For all species, vibrational frequencies were also computed at the specified level of theory to obtain thermal Gibbs Free Energy corrections (at 298 K) and to characterize the stationary points as transition states (one and only one imaginary frequency) or minima (zero imaginary frequencies). Single point energy calculations were performed on optimized geometries in solvent using the SMD-solvation model,<sup>13</sup> M06 functional<sup>14</sup> and 6-311+G(d,p) basis set. This combination has proven highly effective for all organic systems and in the cases here provided good agreement with crystallographic structural data and experimental rate data.<sup>15</sup>

Single-reference approaches (HF, CC) may fail to accurately capture electronic structure and hence the energy of species in the bond breaking transition state for radicals. Failure to accurately describe homolytic bond cleavage can be traced to a degeneracy or near-degeneracy of multiple electronic configurations around the corresponding transition state ('non-dynamical' electron correlation).<sup>15</sup> Adequate description of non-dynamical electron correlation requires multi-reference approaches (CASSCF, MRCI, etc). We assessed our system using the T1 diagnostic method developed by Lee and Taylor,<sup>16</sup> which estimates the importance of an admixture of additional electron configurations to a ground state description. For a typical radical dissociation transition state (N-*i*-Pr pyridinium **1k**), a T1 value of 0.037 was obtained (CCSD/def2TZVP level), which is below the 0.044 threshold typically used as an indicator of suitability of single-reference description of electronic structure.<sup>17</sup> Thus, non-dynamic correlation effects are likely not critical for accurate description of these systems. Low spin contamination value ( $\langle S^2 \rangle = 0.7776$  @ M06/6-311+G(d,p)) also indicates that DFT-based analysis of the system is adequate.<sup>16</sup>

For 'test' systems, calculations were performed in 1,4-dioxane solvent (solvent used in Ni-catalyzed C-N activation reactions). 'Realistic' systems were modeled in *N,N*-dimethyl formamide to enable comparison with experimental electrochemical data, obtained in this solvent. Single-point energies were converted to the enthalpies and Gibbs free energies using corrections from gas-phase frequency analysis. The Berne optimization procedure on preliminary structures obtained via relaxed PES scans yielded desired transition states in all the cases considered. Conformational analysis of the transition states was performed manually.

Absolute rate constants were determined from the computed activation free energies ( $\Delta G^\ddagger$ ) using Eyring equation:

$$k = \frac{k_b T}{h} \exp\left(-\frac{\Delta G^\ddagger}{RT}\right)$$

, where  $k_b = 1.38 \cdot 10^{-23} J/K$  is the Boltzmann constant,  $h = 6.63 \cdot 10^{-34} J \cdot sec$  is the Planck constant,  $R = 1.99 \cdot 10^{-3} kcal/(mol \cdot K)$  is a gas constant and  $T$  is the absolute temperature ( $T = 298.15 K$  in our calculations).

Relative values of the reduction free energies ( $\Delta G_{red}^0$ ,  $J/mol$ ) were converted to the relative reduction potentials ( $E^0$ ,  $V$ ) using the following equation:

$$\Delta G_{red}^0 = -nFE^0$$

Where  $n$  is the number of electrons transferred ( $n = 1$  in our case) and  $F = 96,485 C/mol$  is the Faraday's constant.

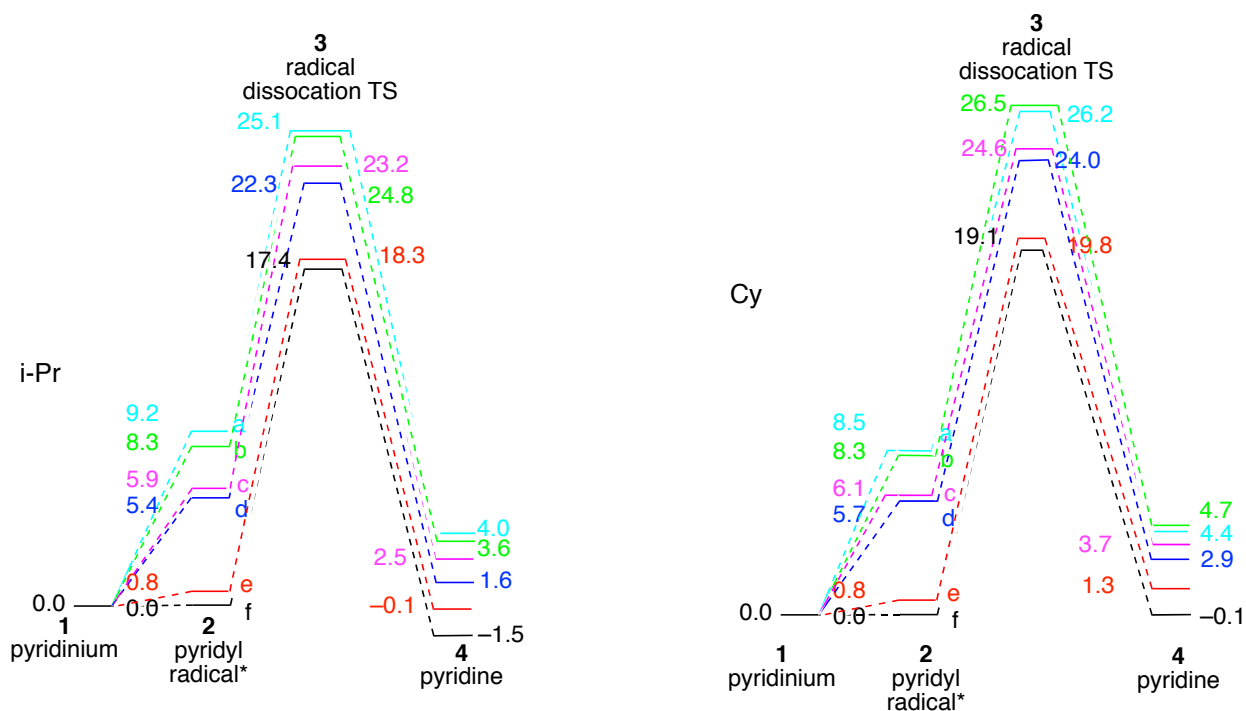

**Figure S3.** Reaction energy profile. \*The values for the 2 (pyridyl radical) are relative values based on a 0.0 kcal/mol energy difference from 1. A strong reductant would lower all values of 2, 3 and 4.

**Table S2.** Pyramidalization values (sum of three bond angles for nitrogen in degrees) and differences for 1-4.

|          | 1- <i>i</i> Pr (pyridinium) | 2- <i>i</i> Pr (radical) | 1- <i>i</i> Pr – 2- <i>i</i> Pr | 3- <i>i</i> Pr (radical TS) | 2- <i>i</i> Pr – 3- <i>i</i> Pr |
|----------|-----------------------------|--------------------------|---------------------------------|-----------------------------|---------------------------------|
| <b>a</b> | 359.0                       | 346.9                    | 12.1                            | 332.5                       | 14.4                            |
| <b>b</b> | 359.1                       | 347.8                    | 11.3                            | 332.5                       | 15.3                            |
| <b>c</b> | 359.2                       | 347.9                    | 11.3                            | 332.5                       | 15.4                            |
| <b>d</b> | 359.3                       | 347.6                    | 11.7                            | 332.4                       | 15.2                            |
| <b>e</b> | 359.4                       | 348.7                    | 10.7                            | 332.2                       | 16.5                            |
| <b>f</b> | 359.5                       | 348.0                    | 11.5                            | 331.8                       | 16.2                            |
| <b>h</b> | 356.7                       | 344.1                    | 12.6                            | 332.0                       | 12.1                            |
| <b>i</b> | 359.3                       | 354.8                    | 4.5                             | 337.9                       | 16.9                            |
| <b>j</b> | 359.3                       | 347.8                    | 11.5                            | 333.4                       | 14.4                            |
| <b>k</b> | 360.0                       | 356.5                    | 3.5                             | 337.3                       | 19.2                            |
| <b>l</b> | 360.0                       | 354.9                    | 5.1                             | 337.0                       | 17.9                            |
| <b>m</b> | 359.8                       | 354.7                    | 5.1                             | 336.2                       | 18.5                            |

# Coordinates and Thermochemical Data

## Pyridinium salts

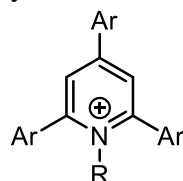

Ar=Ph, R=Cy

|                                              |                             |
|----------------------------------------------|-----------------------------|
| Zero-point correction=                       | 0.497247 (Hartree/Particle) |
| Thermal correction to Energy=                | 0.521704                    |
| Thermal correction to Enthalpy=              | 0.522648                    |
| Thermal correction to Gibbs Free Energy=     | 0.441410                    |
| Sum of electronic and zero-point Energies=   | -1176.025140                |
| Sum of electronic and thermal Energies=      | -1176.000683                |
| Sum of electronic and thermal Enthalpies=    | -1175.999739                |
| Sum of electronic and thermal Free Energies= | -1176.080977                |
| Single-point electronic energy (M06) =       | -1175.94718622              |

  

|   |             |             |             |
|---|-------------|-------------|-------------|
| C | 0.23381300  | 1.25696200  | -0.07663300 |
| C | 0.10608300  | -1.11939700 | -0.09906100 |
| C | 1.61866700  | 1.18536700  | -0.04879500 |
| C | 1.49156700  | -1.18402900 | -0.06648100 |
| C | 2.30212500  | -0.03850100 | -0.01028900 |
| H | 2.16122100  | 2.12265700  | -0.04558300 |
| H | 1.93872300  | -2.16780300 | -0.13754900 |
| N | -0.52830100 | 0.10427000  | -0.04841700 |
| C | -0.39422300 | 2.60681800  | -0.14116700 |
| C | -0.17658300 | 3.52044500  | 0.90187900  |
| C | -1.11084600 | 3.01532400  | -1.27892700 |
| C | -0.69188500 | 4.81402000  | 0.81934600  |
| H | 0.38358800  | 3.21321200  | 1.78069500  |
| C | -1.61465600 | 4.31210800  | -1.35903700 |
| H | -1.25303600 | 2.32744100  | -2.10744800 |
| C | -1.41071700 | 5.21121100  | -0.30923400 |
| H | -0.52794200 | 5.51057900  | 1.63595600  |
| H | -2.15871400 | 4.62305200  | -2.24580100 |
| C | -0.62185300 | -2.41582000 | -0.24790700 |
| C | -1.13379800 | -2.79685900 | -1.49768000 |
| C | -0.63469200 | -3.33716700 | 0.81037200  |
| C | -1.68769000 | -4.06554700 | -1.67108700 |
| H | -1.08063400 | -2.11088600 | -2.33807500 |
| C | -1.19868100 | -4.60062300 | 0.63470300  |
| H | -0.21309900 | -3.06010400 | 1.77274500  |
| C | -1.72817600 | -4.96554800 | -0.60468600 |
| H | -2.07726300 | -4.35242100 | -2.64321900 |
| H | -1.21625400 | -5.30125000 | 1.46405700  |
| C | 3.77019800  | -0.12046400 | 0.04787300  |
| C | 4.39856300  | -1.21869800 | 0.66568800  |
| C | 4.57260800  | 0.89485800  | -0.50663200 |
| C | 5.78639400  | -1.29337600 | 0.73385400  |
| H | 3.80057300  | -1.99895300 | 1.12729300  |
| C | 5.96042800  | 0.81007100  | -0.44810300 |
| H | 4.11386700  | 1.73445900  | -1.02007400 |
| C | 6.57075200  | -0.28134800 | 0.17486400  |
| H | 6.25664100  | -2.13870500 | 1.22684100  |
| H | 6.56662100  | 1.59275500  | -0.89382700 |
| C | -2.01756100 | 0.25025000  | 0.25177400  |
| C | -2.96526900 | -0.10820300 | -0.90205900 |
| C | -2.42178000 | -0.42758700 | 1.57181400  |
| H | -2.12042200 | 1.32144300  | 0.41632700  |
| C | -4.39276900 | 0.33438500  | -0.52558900 |
| H | -2.95983700 | -1.18538100 | -1.08395300 |
| H | -2.64381400 | 0.38472100  | -1.82716500 |
| C | -3.85477500 | 0.00894000  | 1.93514400  |
| H | -2.38903900 | -1.51620200 | 1.47744200  |

|   |             |             |             |
|---|-------------|-------------|-------------|
| H | -1.72313300 | -0.14103500 | 2.36769500  |
| C | -4.84573700 | -0.29387300 | 0.80120900  |
| H | -5.07840600 | 0.05847600  | -1.33443400 |
| H | -4.42652900 | 1.43030400  | -0.44650100 |
| H | -4.15950800 | -0.49865500 | 2.85709000  |
| H | -3.86309800 | 1.08606100  | 2.15428600  |
| H | -5.84356800 | 0.07172300  | 1.06820800  |
| H | -4.93413700 | -1.38232000 | 0.67630100  |
| H | 7.65378800  | -0.34350400 | 0.22367900  |
| H | -2.15973000 | -5.95240500 | -0.74244400 |
| H | -1.80579100 | 6.22052900  | -0.37454000 |

Ar=4-Me-Ph, R=Cy

|                                              |                             |
|----------------------------------------------|-----------------------------|
| Zero-point correction=                       | 0.579646 (Hartree/Particle) |
| Thermal correction to Energy=                | 0.609853                    |
| Thermal correction to Enthalpy=              | 0.610797                    |
| Thermal correction to Gibbs Free Energy=     | 0.514551                    |
| Sum of electronic and zero-point Energies=   | -1293.902708                |
| Sum of electronic and thermal Energies=      | -1293.872502                |
| Sum of electronic and thermal Enthalpies=    | -1293.871558                |
| Sum of electronic and thermal Free Energies= | -1293.967803                |
| Single-point electronic energy (M06) =       | -1293.83466503              |

  

|   |             |             |             |
|---|-------------|-------------|-------------|
| C | 0.07204500  | 1.26381400  | -0.05898200 |
| C | -0.00372000 | -1.11678600 | -0.05354400 |
| C | 1.45818600  | 1.22117700  | -0.04844400 |
| C | 1.38252000  | -1.15034100 | -0.03822100 |
| C | 2.17036500  | 0.01316200  | -0.00447900 |
| H | 1.97912500  | 2.17029900  | -0.06680200 |
| H | 1.84894500  | -2.12503000 | -0.10866200 |
| N | -0.66465700 | 0.09417100  | -0.00581700 |
| C | -0.58522100 | 2.59683000  | -0.13246700 |
| C | -0.34710500 | 3.54649200  | 0.87215600  |
| C | -1.36208500 | 2.96811500  | -1.24340000 |
| C | -0.89597700 | 4.82396600  | 0.77882300  |
| H | 0.25247400  | 3.27858700  | 1.73790500  |
| C | -1.89556000 | 4.24998600  | -1.33039800 |
| H | -1.53166200 | 2.26016000  | -2.04966600 |
| C | -1.67616500 | 5.20164200  | -0.32201500 |
| H | -0.71265400 | 5.53948200  | 1.57589900  |
| H | -2.48722200 | 4.52026900  | -2.20120700 |
| C | -0.70637700 | -2.42730600 | -0.18176400 |
| C | -1.24904200 | -2.82736300 | -1.41173400 |
| C | -0.67196100 | -3.35251900 | 0.87241600  |
| C | -1.78046600 | -4.10664200 | -1.56437100 |
| H | -1.24088800 | -2.14541100 | -2.25719700 |
| C | -1.21584900 | -4.62479100 | 0.71253400  |
| H | -0.23284700 | -3.06989800 | 1.82550200  |
| C | -1.77916000 | -5.02697900 | -0.50718400 |
| H | -2.19517700 | -4.39698600 | -2.52612800 |
| H | -1.19622900 | -5.31948100 | 1.54822400  |
| C | 3.63780400  | -0.03690500 | 0.03047000  |
| C | 4.30700600  | -1.13069500 | 0.61193400  |
| C | 4.41633000  | 1.00554400  | -0.50840400 |
| C | 5.69514200  | -1.17277600 | 0.65740800  |
| H | 3.73980300  | -1.93627000 | 1.06903900  |
| C | 5.80373800  | 0.94861400  | -0.47052100 |
| H | 3.93817200  | 1.85097000  | -0.99387400 |
| C | 6.47232400  | -0.13950000 | 0.11207500  |
| H | 6.18700700  | -2.01912200 | 1.12919300  |
| H | 6.38154800  | 1.75997300  | -0.90512500 |
| C | -2.14725600 | 0.20930600  | 0.33111400  |
| C | -3.11893500 | -0.18419800 | -0.79111300 |
| C | -2.50093400 | -0.46249700 | 1.66888100  |
| H | -2.27086000 | 1.27963600  | 0.48701700  |
| C | -4.54440100 | 0.23321400  | -0.38171700 |
| H | -3.09544400 | -1.26332900 | -0.95902000 |
| H | -2.83351000 | 0.30207400  | -1.73141200 |

|   |             |             |             |
|---|-------------|-------------|-------------|
| C | -3.93265900 | -0.05341600 | 2.06676200  |
| H | -2.44550200 | -1.55122400 | 1.58534300  |
| H | -1.78759400 | -0.15147400 | 2.44221700  |
| C | -4.94794100 | -0.38911900 | 0.96382400  |
| H | -5.24613100 | -0.06604600 | -1.16827700 |
| H | -4.59907600 | 1.32906100  | -0.31333200 |
| H | -4.20165300 | -0.55719000 | 3.00194500  |
| H | -3.95859400 | 1.02565900  | 2.27488000  |
| H | -5.94567000 | -0.04153600 | 1.25466900  |
| H | -5.01655900 | -1.48053400 | 0.85277800  |
| C | -2.33248500 | -6.41937800 | -0.68583700 |
| H | -1.53970600 | -7.11875300 | -0.98139200 |
| H | -2.77047300 | -6.79890100 | 0.24263900  |
| H | -3.10073400 | -6.44961700 | -1.46436600 |
| C | 7.97797300  | -0.20628600 | 0.12737700  |
| H | 8.34485600  | -0.82261200 | 0.95353400  |
| H | 8.35520000  | -0.64891200 | -0.80400800 |
| H | 8.42315500  | 0.78963900  | 0.21638600  |
| C | -2.24023400 | 6.59601700  | -0.43807400 |
| H | -2.32143700 | 7.07922000  | 0.53995900  |
| H | -1.59505700 | 7.22626600  | -1.06374200 |
| H | -3.23240900 | 6.58954900  | -0.90082100 |

**Ar=4-MeO-Ph, R=Cy**

Zero-point correction= 0.595604 (Hartree/Particle)  
 Thermal correction to Energy= 0.627912  
 Thermal correction to Enthalpy= 0.628856  
 Thermal correction to Gibbs Free Energy= 0.529791  
 Sum of electronic and zero-point Energies= -1519.506105  
 Sum of electronic and thermal Energies= -1519.473797  
 Sum of electronic and thermal Enthalpies= -1519.472853  
 Sum of electronic and thermal Free Energies= -1519.571917  
 Single-point electronic energy (M06) = -1519.43710189

|   |             |             |             |
|---|-------------|-------------|-------------|
| C | 0.12371600  | 1.22494700  | 0.03271100  |
| C | -0.21589900 | -1.13552400 | 0.05840800  |
| C | 1.49541900  | 1.02586500  | 0.02088200  |
| C | 1.15731700  | -1.32234300 | 0.05566100  |
| C | 2.07362900  | -0.25363900 | 0.06995700  |
| H | 2.11631200  | 1.91170500  | -0.02166700 |
| H | 1.50803600  | -2.34352300 | -0.02401500 |
| N | -0.73905200 | 0.14324100  | 0.11479200  |
| C | -0.38094300 | 2.61961800  | -0.03996800 |
| C | 0.03586200  | 3.56377100  | 0.91926400  |
| C | -1.17784500 | 3.06198000  | -1.10682200 |
| C | -0.35326800 | 4.89004500  | 0.82816000  |
| H | 0.65543500  | 3.24596700  | 1.75322800  |
| C | -1.56654000 | 4.39528200  | -1.21461200 |
| H | -1.47924100 | 2.36475100  | -1.88308600 |
| C | -1.15923500 | 5.32128500  | -0.24077300 |
| H | -0.04728200 | 5.61803200  | 1.57212500  |
| H | -2.17024600 | 4.70445900  | -2.05940400 |
| C | -1.06495100 | -2.35335300 | -0.05553300 |
| C | -1.73777500 | -2.65548200 | -1.24637000 |
| C | -1.04831800 | -3.32238600 | 0.96633300  |
| C | -2.41408400 | -3.86458700 | -1.40966800 |
| H | -1.71538800 | -1.95276500 | -2.07423000 |
| C | -1.72638700 | -4.52181100 | 0.82153100  |
| H | -0.51036300 | -3.12233900 | 1.88902100  |
| C | -2.42034500 | -4.80511000 | -0.36891600 |
| H | -2.91518200 | -4.06821300 | -2.34839600 |
| H | -1.73074700 | -5.26435800 | 1.61257600  |
| C | 3.52167100  | -0.46625200 | 0.08153400  |
| C | 4.07886500  | -1.65538500 | 0.60639300  |
| C | 4.40966100  | 0.50021100  | -0.42726300 |
| C | 5.44452800  | -1.86006300 | 0.62743900  |
| H | 3.43370300  | -2.41422500 | 1.03821700  |
| C | 5.78489300  | 0.30272100  | -0.42525900 |
| H | 4.02541100  | 1.41231200  | -0.87331600 |
| C | 6.31689600  | -0.88379600 | 0.10740300  |
| H | 5.87271700  | -2.76457400 | 1.04623400  |
| H | 6.43176900  | 1.06395300  | -0.84425000 |

|   |             |             |             |
|---|-------------|-------------|-------------|
| C | -2.17914300 | 0.42018800  | 0.52757400  |
| C | -3.24759800 | 0.16969500  | -0.54707500 |
| C | -2.54670300 | -0.23776100 | 1.86920900  |
| H | -2.16736800 | 1.49406300  | 0.70837100  |
| C | -4.59114300 | 0.74350100  | -0.05883300 |
| H | -3.36311300 | -0.90104600 | -0.73022500 |
| H | -2.95434700 | 0.63569600  | -1.49492100 |
| C | -3.89824000 | 0.32717200  | 2.34814300  |
| H | -2.62466900 | -1.32322500 | 1.76247700  |
| H | -1.76486100 | -0.03280000 | 2.61098800  |
| C | -4.99940400 | 0.14000000  | 1.29372800  |
| H | -5.36157100 | 0.54846900  | -0.81347900 |
| H | -4.51171100 | 1.83627000  | 0.03254800  |
| H | -4.17889500 | -0.16339600 | 3.28692500  |
| H | -3.78562000 | 1.39664400  | 2.57606200  |
| H | -5.93393800 | 0.59406500  | 1.64228700  |
| H | -5.20090000 | -0.93303700 | 1.16547200  |
| O | -3.04418500 | -6.00190200 | -0.41177000 |
| O | 7.62819600  | -1.18125600 | 0.16597200  |
| O | -1.47866500 | 6.63234600  | -0.24084900 |
| C | 8.58055300  | -0.24104600 | -0.33414500 |
| H | 8.43136800  | -0.06001600 | -1.40491900 |
| H | 8.52580800  | 0.70598200  | 0.21506900  |
| H | 9.55612000  | -0.70002300 | -0.17420400 |
| C | -3.75729200 | -6.36932600 | -1.59152200 |
| H | -3.08858500 | -6.42371800 | -2.45892800 |
| H | -4.17057300 | -7.35755400 | -1.38898300 |
| H | -4.57376700 | -5.66658500 | -1.79677300 |
| C | -2.28797500 | 7.15052900  | -1.29576700 |
| H | -1.79837100 | 7.02676100  | -2.26904100 |
| H | -3.27341400 | 6.66975000  | -1.31246200 |
| H | -2.40547200 | 8.21267100  | -1.08049900 |

**Ar=4-CF3-Ph, R=Cy**

Zero-point correction= 0.510938 (Hartree/Particle)  
 Thermal correction to Energy= 0.546511  
 Thermal correction to Enthalpy= 0.547456  
 Thermal correction to Gibbs Free Energy= 0.436349  
 Sum of electronic and zero-point Energies= -2187.104546  
 Sum of electronic and thermal Energies= -2187.068972  
 Sum of electronic and thermal Enthalpies= -2187.068028  
 Sum of electronic and thermal Free Energies= -2187.179135  
 Single-point electronic energy (M06) = -2187.04602421

|   |             |             |             |
|---|-------------|-------------|-------------|
| C | 0.32693700  | -1.23181400 | 0.04623000  |
| C | 0.14964500  | 1.13857000  | 0.05805100  |
| C | -1.05549700 | -1.34056700 | 0.02643700  |
| C | -1.23403100 | 1.02634800  | 0.04071800  |
| C | -1.89011000 | -0.21438000 | 0.05000800  |
| H | -1.47380200 | -2.33938100 | 0.00319400  |
| H | -1.80182200 | 1.94609700  | -0.02941300 |
| N | 0.93372000  | 0.00681000  | 0.11107600  |
| C | 1.12638200  | -2.49002800 | -0.01631400 |
| C | 1.05051200  | -3.41470700 | 1.03523800  |
| C | 1.87312700  | -2.80744700 | -1.16335600 |
| C | 1.73079600  | -4.62873900 | 0.95273500  |
| H | 0.47165900  | -3.18098700 | 1.92407100  |
| C | 2.54508200  | -4.02302900 | -1.24591300 |
| H | 1.91441000  | -2.11351800 | -1.99748400 |
| C | 2.47701200  | -4.93269800 | -0.18648400 |
| H | 1.68385200  | -5.33509200 | 1.77422100  |
| H | 3.12121800  | -4.26630100 | -2.13244700 |
| C | 0.70815100  | 2.52218700  | -0.03907200 |
| C | 1.19149600  | 3.00225200  | -1.26526100 |
| C | 0.57732100  | 3.40686500  | 1.04165100  |
| C | 1.58159300  | 4.33370200  | -1.39337000 |
| H | 1.24265700  | 2.34379100  | -2.12692400 |
| C | 0.97672500  | 4.73554700  | 0.91543700  |
| H | 0.17180100  | 3.05462700  | 1.98571200  |
| C | 1.48443300  | 5.19761500  | -0.30064800 |
| H | 1.94484100  | 4.70392400  | -2.34601200 |
| H | 0.88133500  | 5.41436900  | 1.75594100  |

|   |             |             |             |
|---|-------------|-------------|-------------|
| C | -3.35916900 | -0.32413900 | 0.04829500  |
| C | -4.14941600 | 0.65971600  | 0.67054500  |
| C | -3.99835000 | -1.41553200 | -0.56865200 |
| C | -5.53566700 | 0.55316400  | 0.68058900  |
| H | -3.68104100 | 1.49351200  | 1.18434100  |
| C | -5.38484300 | -1.51580600 | -0.56946400 |
| H | -3.41564400 | -2.17397400 | -1.08214300 |
| C | -6.15544100 | -0.53247500 | 0.05659400  |
| H | -6.13622900 | 1.30427400  | 1.18180500  |
| H | -5.86959200 | -2.35662100 | -1.05352300 |
| C | 1.96885800  | 6.62452400  | -0.42542400 |
| C | 3.17220400  | -6.27001100 | -0.31012300 |
| F | 3.28253200  | 6.70897100  | -0.12926700 |
| F | 1.30908900  | 7.44344800  | 0.41528200  |
| F | 1.80521700  | 7.08954100  | -1.67860700 |
| F | 3.42507800  | -6.80847400 | 0.89740900  |
| F | 4.34226000  | -6.14819400 | -0.96790200 |
| F | 2.41054000  | -7.14407000 | -0.99775900 |
| C | -7.66462700 | -0.61805100 | 0.01071200  |
| F | -8.08108000 | -1.89873900 | -0.00757900 |
| F | -8.14269300 | -0.01862300 | -1.09840400 |
| F | -8.22338900 | -0.01095100 | 1.07505300  |
| C | 2.42909100  | 0.04619200  | 0.42686300  |
| C | 3.33076700  | 0.51962200  | -0.72276500 |
| C | 2.73878500  | 0.76351400  | 1.75112600  |
| H | 2.66070700  | -1.00481400 | 0.59054400  |
| C | 4.80036100  | 0.25633100  | -0.33949200 |
| H | 3.19466500  | 1.58828200  | -0.90510500 |
| H | 3.07674300  | -0.00833100 | -1.64961200 |
| C | 4.21305000  | 0.50272100  | 2.11989800  |
| H | 2.57734200  | 1.84062500  | 1.66020100  |
| H | 2.07562700  | 0.39224400  | 2.54228200  |
| C | 5.16469700  | 0.93007800  | 0.99220600  |
| H | 5.44952900  | 0.61937100  | -1.14372900 |
| H | 4.97011500  | -0.82716500 | -0.26553800 |
| H | 4.44848100  | 1.03972500  | 3.04528000  |
| H | 4.35187400  | -0.56609500 | 2.33543900  |
| H | 6.19822200  | 0.68878500  | 1.26372600  |
| H | 5.11977900  | 2.02164800  | 0.87164100  |

#### Ar=4-F-Ph, R=Cy

|                                              |                             |             |             |
|----------------------------------------------|-----------------------------|-------------|-------------|
| Zero-point correction=                       | 0.472361 (Hartree/Particle) |             |             |
| Thermal correction to Energy=                | 0.499356                    |             |             |
| Thermal correction to Enthalpy=              | 0.500300                    |             |             |
| Thermal correction to Gibbs Free Energy=     | 0.412879                    |             |             |
| Sum of electronic and zero-point Energies=   | -1473.742674                |             |             |
| Sum of electronic and thermal Energies=      | -1473.715679                |             |             |
| Sum of electronic and thermal Enthalpies=    | -1473.714735                |             |             |
| Sum of electronic and thermal Free Energies= | -1473.802156                |             |             |
| Single-point electronic energy (M06) =       | -1473.66990635              |             |             |
| C                                            | 0.08700900                  | 1.26008200  | -0.06206500 |
| C                                            | -0.00962500                 | -1.11854000 | -0.05833400 |
| C                                            | 1.47288200                  | 1.20564900  | -0.05180100 |
| C                                            | 1.37635800                  | -1.16488300 | -0.04297300 |
| C                                            | 2.17468300                  | -0.00847300 | -0.00801300 |
| H                                            | 2.00178500                  | 2.15046000  | -0.06952900 |
| H                                            | 1.83371000                  | -2.14376500 | -0.11594500 |
| N                                            | -0.66056400                 | 0.09761600  | -0.00964400 |
| C                                            | -0.55774600                 | 2.60011300  | -0.13261900 |
| C                                            | -0.31047300                 | 3.54165000  | 0.88038300  |
| C                                            | -1.32124700                 | 2.98135200  | -1.25070000 |
| C                                            | -0.83544800                 | 4.82883900  | 0.79809800  |
| H                                            | 0.28298600                  | 3.26161600  | 1.74590400  |
| C                                            | -1.84241800                 | 4.26759300  | -1.34758500 |
| H                                            | -1.49083100                 | 2.27765000  | -2.06002500 |
| C                                            | -1.59459100                 | 5.17158600  | -0.31680600 |
| H                                            | -0.66378100                 | 5.56303600  | 1.57769800  |
| H                                            | -2.42358300                 | 4.58158600  | -2.20784000 |
| C                                            | -0.72465100                 | -2.42283500 | -0.18699100 |
| C                                            | -1.26440400                 | -2.81649000 | -1.42226800 |
| C                                            | -0.69763800                 | -3.34534900 | 0.87148500  |

|   |             |             |             |
|---|-------------|-------------|-------------|
| C | -1.80736000 | -4.08859800 | -1.58733200 |
| H | -1.24375700 | -2.13489900 | -2.26718600 |
| C | -1.24681400 | -4.61639000 | 0.72216900  |
| H | -0.25637700 | -3.06409300 | 1.82341000  |
| C | -1.79692200 | -4.96708800 | -0.50764800 |
| H | -2.22270300 | -4.40934900 | -2.53655500 |
| H | -1.24680200 | -5.33444700 | 1.53503300  |
| C | 3.64163200  | -0.07085500 | 0.02838700  |
| C | 4.29775100  | -1.17149600 | 0.61659800  |
| C | 4.42629600  | 0.96506900  | -0.51821200 |
| C | 5.68397300  | -1.23653200 | 0.66793600  |
| H | 3.72117800  | -1.97017100 | 1.07278900  |
| C | 5.81344600  | 0.90698500  | -0.48517500 |
| H | 3.95343300  | 1.80883000  | -1.01053700 |
| C | 6.42332900  | -0.19432200 | 0.11212600  |
| H | 6.19848600  | -2.07035300 | 1.13281600  |
| H | 6.42653500  | 1.68976400  | -0.91816100 |
| C | -2.14470000 | 0.22527600  | 0.32360300  |
| C | -3.11602000 | -0.15696600 | -0.80284700 |
| C | -2.50924700 | -0.44456900 | 1.65940800  |
| H | -2.25836000 | 1.29639200  | 0.48117800  |
| C | -4.53896600 | 0.27433600  | -0.39767200 |
| H | -3.10406000 | -1.23629600 | -0.97123700 |
| H | -2.82264400 | 0.32633900  | -1.74238800 |
| C | -3.93808800 | -0.02021400 | 2.05277800  |
| H | -2.46690600 | -1.53375000 | 1.57436200  |
| H | -1.79507800 | -0.14303500 | 2.43571400  |
| C | -4.95307100 | -0.34443300 | 0.94624000  |
| H | -5.24037400 | -0.01789000 | -1.18691400 |
| H | -4.58329700 | 1.37060200  | -0.32950100 |
| H | -4.21486700 | -0.52210600 | 2.98651900  |
| H | -3.95288100 | 1.05872900  | 2.26229400  |
| H | -5.94760400 | 0.01414500  | 1.23384700  |
| H | -5.03403000 | -1.43488700 | 0.83461100  |
| F | -2.09772000 | 6.40739100  | -0.40497900 |
| F | -2.32078900 | -6.18857900 | -0.65985000 |
| F | 7.75697400  | -0.25330100 | 0.15217700  |

#### Ar=3,5-diF-Ph, R=Cy

|                                              |                             |             |             |
|----------------------------------------------|-----------------------------|-------------|-------------|
| Zero-point correction=                       | 0.446999 (Hartree/Particle) |             |             |
| Thermal correction to Energy=                | 0.476740                    |             |             |
| Thermal correction to Enthalpy=              | 0.477684                    |             |             |
| Thermal correction to Gibbs Free Energy=     | 0.383182                    |             |             |
| Sum of electronic and zero-point Energies=   | -1771.452589                |             |             |
| Sum of electronic and thermal Energies=      | -1771.422848                |             |             |
| Sum of electronic and thermal Enthalpies=    | -1771.421903                |             |             |
| Sum of electronic and thermal Free Energies= | -1771.516406                |             |             |
| Single-point electronic energy (M06) =       | -1771.38252944              |             |             |
| C                                            | 0.00945500                  | 1.25652000  | -0.00330400 |
| C                                            | 0.08762100                  | -1.11609300 | 0.04225800  |
| C                                            | -1.37647000                 | 1.21884000  | 0.02049100  |
| C                                            | -1.29985200                 | -1.15269900 | 0.06355900  |
| C                                            | -2.08469800                 | 0.00948900  | 0.02824200  |
| H                                            | -1.89868700                 | 2.16771200  | 0.01888500  |
| H                                            | -1.76555500                 | -2.12621800 | 0.15481100  |
| N                                            | 0.74659900                  | 0.09038700  | -0.03884300 |
| C                                            | 0.66874800                  | 2.59590700  | 0.01920800  |
| C                                            | 0.50022800                  | 3.45772800  | -1.07242800 |
| C                                            | 1.35707300                  | 3.02330400  | 1.16446300  |
| C                                            | 1.04955600                  | 4.73634200  | -1.00241800 |
| H                                            | -0.03321700                 | 3.15458400  | -1.96650400 |
| C                                            | 1.87898800                  | 4.31348600  | 1.18287400  |
| H                                            | 1.47311900                  | 2.39061000  | 2.03701200  |
| C                                            | 1.74365800                  | 5.19136700  | 0.11246500  |
| C                                            | 0.78695900                  | -2.43317400 | 0.16808000  |
| C                                            | 1.28911200                  | -2.83334100 | 1.41335200  |
| C                                            | 0.76632300                  | -3.33067900 | -0.90788100 |
| C                                            | 1.80160000                  | -4.12224200 | 1.54350700  |
| H                                            | 1.27125500                  | -2.18071900 | 2.27859800  |
| C                                            | 1.29762900                  | -4.60499200 | -0.72501500 |
| H                                            | 0.36040300                  | -3.05760100 | -1.87558200 |

|   |             |             |             |
|---|-------------|-------------|-------------|
| C | 1.82414600  | -5.02853200 | 0.49010000  |
| C | -3.55776700 | -0.04048100 | 0.03119900  |
| C | -4.22452800 | -1.13467600 | -0.54703500 |
| C | -4.30222700 | 1.00346900  | 0.60720300  |
| C | -5.61385800 | -1.15634700 | -0.54267100 |
| H | -3.69294300 | -1.94477100 | -1.03264700 |
| C | -5.68970300 | 0.92665000  | 0.59663500  |
| H | -3.83302000 | 1.84808300  | 1.09796200  |
| C | -6.37537500 | -0.14027700 | 0.02530200  |
| C | 2.24110900  | 0.20685300  | -0.34278400 |
| C | 3.17367000  | -0.14950900 | 0.82388600  |
| C | 2.63877500  | -0.49470700 | -1.65173600 |
| H | 2.36079100  | 1.27379900  | -0.52194000 |
| C | 4.61188200  | 0.25966500  | 0.44945300  |
| H | 3.14618000  | -1.22326500 | 1.02387200  |
| H | 2.85593600  | 0.36541800  | 1.73830400  |
| C | 4.08171900  | -0.08650500 | -2.01075900 |
| H | 2.58854500  | -1.58123800 | -1.54466700 |
| H | 1.94972800  | -0.20687200 | -2.45543400 |
| C | 5.06012900  | -0.39313200 | -0.86700800 |
| H | 5.28600700  | -0.01985100 | 1.26633000  |
| H | 4.66821300  | 1.35363900  | 0.35846700  |
| H | 4.38187200  | -0.61071500 | -2.92461000 |
| H | 4.10972200  | 0.98733000  | -2.24360300 |
| H | 6.06556400  | -0.04860700 | -1.13251400 |
| H | 5.12927100  | -1.48134700 | -0.72873100 |
| H | 2.22597200  | -6.02739900 | 0.61347700  |
| H | 2.15767200  | 6.19222300  | 0.14897200  |
| H | -7.45841400 | -0.17869600 | 0.02351600  |
| F | -6.39168900 | 1.91517100  | 1.16161600  |
| F | -6.24176900 | -2.19239500 | -1.10978700 |
| F | 0.89976100  | 5.55472000  | -2.04864700 |
| F | 2.53087900  | 4.72439300  | 2.27583500  |
| F | 1.29347000  | -5.45403900 | -1.75832400 |
| F | 2.28290200  | -4.50031700 | 2.73291800  |

**Ar=3,5-diMe-Ph, R=Cy**

Zero-point correction= 0.662083 (Hartree/Particle)  
 Thermal correction to Energy= 0.698087  
 Thermal correction to Enthalpy= 0.699031  
 Thermal correction to Gibbs Free Energy= 0.587805  
 Sum of electronic and zero-point Energies= -1411.775605  
 Sum of electronic and thermal Energies= -1411.739601  
 Sum of electronic and thermal Enthalpies= -1411.738656  
 Sum of electronic and thermal Free Energies= -1411.849883  
 Single-point electronic energy (M06) = -1411.71876982

|   |             |             |             |
|---|-------------|-------------|-------------|
| C | -0.00219100 | 1.26170900  | 0.00259300  |
| C | 0.10511100  | -1.11635000 | 0.05329000  |
| C | -1.38721100 | 1.20250300  | 0.03250100  |
| C | -1.28084600 | -1.16721200 | 0.07958800  |
| C | -2.08340000 | -0.01501800 | 0.04312300  |
| H | -1.92075100 | 2.14476600  | 0.03551500  |
| H | -1.73335300 | -2.14570300 | 0.18085900  |
| N | 0.74783400  | 0.10097700  | -0.03717700 |
| C | 0.64004600  | 2.60646700  | 0.01896000  |
| C | 0.40208400  | 3.49338400  | -1.03919300 |
| C | 1.38953100  | 3.02872900  | 1.12803900  |
| C | 0.92903700  | 4.79042500  | -1.01611000 |
| H | -0.18579400 | 3.16687200  | -1.89332700 |
| C | 1.91234400  | 4.32426100  | 1.18190000  |
| H | 1.54396900  | 2.35398900  | 1.96598200  |
| C | 1.67634700  | 5.18333300  | 0.10001100  |
| C | 0.82541300  | -2.41938300 | 0.18599700  |
| C | 1.35552100  | -2.80089600 | 1.42575300  |
| C | 0.80310900  | -3.33883000 | -0.87112400 |
| C | 1.90034200  | -4.07764300 | 1.60785400  |
| H | 1.32299300  | -2.10981900 | 2.26383100  |
| C | 1.35153200  | -4.61748900 | -0.71905600 |
| H | 0.36082600  | -3.05476800 | -1.82274600 |
| C | 1.89340700  | -4.96449600 | 0.52470000  |
| C | -3.55293900 | -0.08329100 | 0.05293500  |

|   |             |             |             |
|---|-------------|-------------|-------------|
| C | -4.21536000 | -1.18666400 | -0.51352000 |
| C | -4.31520200 | 0.95042800  | 0.62533900  |
| C | -5.60928600 | -1.26331800 | -0.52431400 |
| H | -3.64207400 | -1.97874900 | -0.98737800 |
| C | -5.70993800 | 0.89187300  | 0.64397900  |
| H | -3.81983600 | 1.79193700  | 1.10131300  |
| C | -6.33595600 | -0.21838300 | 0.06161200  |
| C | 2.22697100  | 0.23035200  | -0.38025100 |
| C | 3.20036900  | -0.13158200 | 0.75093700  |
| C | 2.58985900  | -0.45827800 | -1.70663000 |
| H | 2.33691800  | 1.29951200  | -0.55306100 |
| C | 4.62293900  | 0.28975700  | 0.33597000  |
| H | 3.18346000  | -1.20699100 | 0.94241800  |
| H | 2.90793500  | 0.37348800  | 1.67914700  |
| C | 4.01819800  | -0.04140500 | -2.10813600 |
| C | 2.54457600  | -1.54589300 | -1.60671500 |
| H | 1.87477400  | -0.16592900 | -2.48565900 |
| C | 5.03408300  | -0.35153200 | -0.99829200 |
| H | 5.32620000  | 0.01024900  | 1.12849300  |
| H | 4.66868900  | 1.38465800  | 0.24844800  |
| H | 4.29393000  | -0.55618000 | -3.03538500 |
| H | 4.03477600  | 1.03476800  | -2.33182300 |
| H | 6.02981900  | -0.00124100 | -1.29285200 |
| H | 5.11048900  | -1.44051200 | -0.86946800 |
| H | 2.30953300  | -5.96121400 | 0.65805700  |
| H | 2.08228900  | 6.19251700  | 0.13252500  |
| H | -7.42309600 | -0.27176000 | 0.06612000  |
| C | -6.32294400 | -2.43339400 | -1.15926900 |
| H | -5.62016800 | -3.21003100 | -1.47500000 |
| H | -7.03657700 | -2.88757700 | -0.46256800 |
| H | -6.89107100 | -2.11788300 | -2.04267300 |
| C | -6.53046900 | 1.98745300  | 1.28252000  |
| H | -5.89803400 | 2.79527000  | 1.66220400  |
| H | -7.23674800 | 2.42199900  | 0.56555400  |
| H | -7.12038600 | 1.60142000  | 2.12218300  |
| C | 2.48226800  | -4.49039800 | 2.93952000  |
| H | 2.12833300  | -5.48310600 | 3.23764000  |
| H | 3.57744500  | -4.53957100 | 2.89324000  |
| H | 2.21563400  | -3.78477100 | 3.73204800  |
| C | 1.36155200  | -5.60087300 | -1.86557800 |
| H | 2.37638800  | -5.73631400 | -2.25985800 |
| H | 1.00644000  | -6.58690300 | -1.54685900 |
| H | 0.72816600  | -5.26367800 | -2.69148300 |
| C | 2.69129300  | 4.80043100  | 2.38534700  |
| H | 3.62633300  | 5.28695500  | 2.08656200  |
| H | 2.11555900  | 5.53571600  | 2.96077900  |
| H | 2.93979400  | 3.97437700  | 3.05825000  |
| C | 0.71168100  | 5.73703700  | -2.17268100 |
| H | 0.48222500  | 6.74854300  | -1.82160200 |
| H | 1.61142500  | 5.80814200  | -2.79686000 |
| H | -0.10963700 | 5.40632200  | -2.81549600 |

**Ar=Ph, R=iPr**

Zero-point correction= 0.430433 (Hartree/Particle)  
 Thermal correction to Energy= 0.453250  
 Thermal correction to Enthalpy= 0.454194  
 Thermal correction to Gibbs Free Energy= 0.376625  
 Sum of electronic and zero-point Energies= -1059.354015  
 Sum of electronic and thermal Energies= -1059.331198  
 Sum of electronic and thermal Enthalpies= -1059.330254  
 Sum of electronic and thermal Free Energies= -1059.407823  
 Single-point electronic energy (M06) = -1059.26985393

|   |             |             |             |
|---|-------------|-------------|-------------|
| C | -2.50856000 | 0.36219600  | 0.50070800  |
| H | -2.55033700 | 1.43367100  | 0.67844900  |
| C | -0.23700500 | 1.27466800  | 0.03341700  |
| C | -0.46984800 | -1.09498900 | 0.01751000  |
| C | 1.14231800  | 1.14204100  | -0.02385000 |
| C | 0.91065500  | -1.22066700 | -0.03464100 |
| C | 1.77233500  | -0.11122000 | -0.02755400 |
| H | 1.72476400  | 2.05451900  | -0.05352500 |

|   |             |             |             |   |             |             |             |
|---|-------------|-------------|-------------|---|-------------|-------------|-------------|
| H | 1.30892700  | -2.22280400 | -0.13405100 | C | -5.42032400 | -1.51465900 | -0.12835500 |
| N | -1.04420300 | 0.15562700  | 0.10720900  | H | -5.64170700 | -0.38263100 | 1.69152200  |
| C | -0.81095100 | 2.64963500  | 0.00690400  | H | -4.83980200 | -2.53901200 | -1.93618200 |
| C | -0.50054700 | 3.54986800  | 1.03812600  | C | 2.26529200  | -1.48288000 | -0.02213700 |
| C | -1.57166800 | 3.09011100  | -1.08957800 | C | 2.55801200  | -2.18203000 | -1.20293200 |
| C | -0.96700100 | 4.86331300  | 0.98488800  | C | 3.21876900  | -1.47028600 | 1.00712700  |
| H | 0.09351900  | 3.21740300  | 1.88488300  | C | 3.75633200  | -2.88131700 | -1.32859400 |
| C | -2.02553700 | 4.40653300  | -1.14133500 | H | 1.85855100  | -2.16372400 | -2.03357600 |
| H | -1.78651300 | 2.41122200  | -1.90982600 | C | 4.40857300  | -2.18284900 | 0.87574800  |
| C | -1.72877400 | 5.29291800  | -0.10304600 | H | 3.02099300  | -0.91558800 | 1.92052700  |
| H | -0.73174500 | 5.55004300  | 1.79229600  | C | 4.70097900  | -2.90071700 | -0.29256900 |
| H | -2.60419200 | 4.74200300  | -1.99667300 | C | 3.96468800  | -3.41413800 | -2.25275800 |
| C | -1.26736500 | -2.35379600 | -0.08241000 | H | 5.12448200  | -2.17642600 | 1.69342100  |
| C | -1.90693100 | -2.69261100 | -1.28475500 | C | 0.42885600  | 3.13066200  | -0.04304300 |
| C | -1.23189300 | -3.28775800 | 0.96477700  | C | 1.59227100  | 3.69126300  | 0.51890200  |
| C | -2.53533400 | -3.93084100 | -1.41961600 | C | -0.50749900 | 4.00075800  | -0.63324800 |
| H | -1.89425700 | -1.99987400 | -2.12100800 | C | 1.80152200  | 5.06424100  | 0.49730900  |
| C | -1.87086000 | -4.51987600 | 0.82861500  | H | 2.31969500  | 3.05449200  | 1.01386300  |
| H | -0.71505300 | -3.04379200 | 1.88893900  | C | -0.28261200 | 5.37165900  | -0.66333400 |
| C | -2.52572300 | -4.84184700 | -0.36186600 | H | -1.40119000 | 3.60421100  | -1.10574100 |
| H | -3.02280700 | -4.18586800 | -2.35576600 | C | 0.87335500  | 5.93233400  | -0.09913700 |
| H | -1.85021700 | -5.22962000 | 1.65007500  | H | 2.69754500  | 5.47348700  | 0.95626200  |
| C | 3.23591200  | -0.25798000 | -0.05991400 | H | -1.01442400 | 6.02063800  | -1.13675000 |
| C | 3.85166300  | -1.38589400 | 0.51595100  | C | -0.25128900 | -3.61662800 | -0.47410600 |
| C | 4.04710900  | 0.72329200  | -0.66130900 | H | 0.80714500  | -3.85669600 | -0.57696200 |
| C | 5.23623600  | -1.52266900 | 0.49745300  | H | -0.77536100 | -4.52928000 | -0.17066800 |
| H | 3.24937800  | -2.14078600 | 1.01280100  | H | -0.64367300 | -3.32023400 | -1.45135400 |
| C | 5.43060400  | 0.57619300  | -0.68975900 | C | 0.14413600  | -2.86138900 | 1.94197900  |
| H | 3.59566100  | 1.58486100  | -1.14389800 | H | -0.28704500 | -3.79540100 | 2.31746700  |
| C | 6.02887900  | -0.54424800 | -0.10790400 | H | 1.22368200  | -2.99859000 | 1.86719500  |
| H | 5.69792600  | -2.39012500 | 0.95905400  | H | -0.06771100 | -2.07840000 | 2.67743900  |
| H | 6.04241700  | 1.33298100  | -1.17107000 | C | 6.00665000  | -3.64095000 | -0.44634100 |
| C | -3.51341300 | 0.05156700  | -0.61138000 | H | 6.76124400  | -3.00398800 | -0.92579100 |
| H | -3.68688300 | -1.01759800 | -0.73485300 | H | 6.40894900  | -3.95074200 | 0.52283600  |
| H | -4.46628100 | 0.51741300  | -0.33852000 | H | 5.89080500  | -4.53259600 | -1.07033100 |
| H | -3.20239700 | 0.47407300  | -1.57149000 | C | -6.87241900 | -1.91272000 | -0.22058000 |
| C | -2.83331700 | -0.32077600 | 1.83276000  | H | -7.39044500 | -1.76761900 | 0.73163500  |
| H | -3.79711100 | 0.06720100  | 2.17888400  | H | -7.39418100 | -1.31173300 | -0.97282800 |
| H | -2.92200500 | -1.40437300 | 1.74716400  | H | -6.98141100 | -2.96263700 | -0.51249000 |
| H | -2.08608900 | -0.08098600 | 2.59628900  | C | 1.12366300  | 7.41764200  | -0.15249300 |
| H | -3.01646000 | -5.80450900 | -0.46931000 | H | 1.66901600  | 7.76433000  | 0.73087900  |
| H | -2.08570900 | 6.31754700  | -0.14563700 | H | 1.72926200  | 7.67718500  | -1.03088200 |
| H | 7.10897800  | -0.65496800 | -0.12681800 | H | 0.18828600  | 7.98074600  | -0.22285900 |

Ar=4-Me-Ph, R=iPr

|                                              |                |                    |             |
|----------------------------------------------|----------------|--------------------|-------------|
| Zero-point correction=                       | 0.512941       | (Hartree/Particle) |             |
| Thermal correction to Energy=                | 0.541465       |                    |             |
| Thermal correction to Enthalpy=              | 0.542409       |                    |             |
| Thermal correction to Gibbs Free Energy=     | 0.449789       |                    |             |
| Sum of electronic and zero-point Energies=   | -1177.231683   |                    |             |
| Sum of electronic and thermal Energies=      | -1177.203159   |                    |             |
| Sum of electronic and thermal Enthalpies=    | -1177.202215   |                    |             |
| Sum of electronic and thermal Free Energies= | -1177.294835   |                    |             |
| Single-point electronic energy (M06) =       | -1177.15744730 |                    |             |
| C                                            | -0.51421400    | -2.55185300        | 0.59380500  |
| H                                            | -1.58749000    | -2.52951700        | 0.76470400  |
| C                                            | -1.29856400    | -0.24865600        | 0.05257300  |
| C                                            | 1.05658900     | -0.61365400        | 0.06682500  |
| C                                            | -1.08596500    | 1.12026100         | -0.01549100 |
| C                                            | 1.26002200     | 0.75661700         | 0.00798900  |
| C                                            | 0.20045200     | 1.68059500         | -0.00323200 |
| H                                            | -1.96360800    | 1.75222900         | -0.06803300 |
| H                                            | 2.28391500     | 1.09608900         | -0.08675000 |
| N                                            | -0.22629000    | -1.11657900        | 0.15136100  |
| C                                            | -2.70093800    | -0.74312800        | 0.01287800  |
| C                                            | -3.61629900    | -0.31802800        | 0.98723900  |
| C                                            | -3.16271800    | -1.54818100        | -1.04335800 |
| C                                            | -4.95198500    | -0.70975300        | 0.91821200  |
| H                                            | -3.27874000    | 0.30480000         | 1.81117600  |
| C                                            | -4.50028900    | -1.92338200        | -1.10717700 |
| H                                            | -2.47958300    | -1.86104100        | -1.82780200 |

Ar=4-MeO-Ph, R=iPr

|                                              |                |                    |             |
|----------------------------------------------|----------------|--------------------|-------------|
| Zero-point correction=                       | 0.528908       | (Hartree/Particle) |             |
| Thermal correction to Energy=                | 0.559487       |                    |             |
| Thermal correction to Enthalpy=              | 0.560431       |                    |             |
| Thermal correction to Gibbs Free Energy=     | 0.465519       |                    |             |
| Sum of electronic and zero-point Energies=   | -1402.835327   |                    |             |
| Sum of electronic and thermal Energies=      | -1402.804748   |                    |             |
| Sum of electronic and thermal Enthalpies=    | -1402.803803   |                    |             |
| Sum of electronic and thermal Free Energies= | -1402.898716   |                    |             |
| Single-point electronic energy (M06) =       | -1402.76004689 |                    |             |
| C                                            | 1.99019600     | 1.62347400         | 0.88698400  |
| H                                            | 2.80433800     | 0.92539800         | 1.06673300  |
| C                                            | 1.21222100     | -0.62803900        | 0.15169300  |
| C                                            | -0.40695900    | 1.12488900         | 0.18302500  |
| C                                            | 0.19501800     | -1.56152200        | 0.02091300  |
| C                                            | -1.41501400    | 0.18281800         | 0.06210100  |
| C                                            | -1.16323900    | -1.20242300        | 0.01520100  |
| H                                            | 0.49316600     | -2.59790500        | -0.07390600 |
| H                                            | -2.42146900    | 0.56104700         | -0.06516400 |
| N                                            | 0.90935500     | 0.71580200         | 0.30237600  |
| C                                            | 2.61511700     | -1.10853200        | 0.12132800  |
| C                                            | 3.02656500     | -2.12787500        | 1.00359500  |
| C                                            | 3.52772000     | -0.65847000        | -0.84569100 |
| C                                            | 4.30587400     | -2.65371500        | 0.93675400  |
| H                                            | 2.33926900     | -2.49408000        | 1.76112400  |
| C                                            | 4.81275300     | -1.18806800        | -0.93018000 |
| H                                            | 3.22536300     | 0.09570900         | -1.56636100 |

|   |             |             |             |   |             |             |             |
|---|-------------|-------------|-------------|---|-------------|-------------|-------------|
| C | 5.21454600  | -2.19001200 | -0.03192900 | H | 3.22878900  | -0.22398000 | -2.00476600 |
| H | 4.63203300  | -3.42726200 | 1.62397700  | C | 4.46437400  | -2.18554900 | 1.10742400  |
| H | 5.48480000  | -0.82720200 | -1.69952700 | H | 2.47616200  | -1.94109700 | 1.87976700  |
| C | -0.79841400 | 2.55853300  | 0.12088400  | C | 5.33727800  | -1.92272800 | 0.04816900  |
| C | -0.47675300 | 3.34818600  | -0.99089100 | H | 5.57033600  | -1.02180700 | -1.89394100 |
| C | -1.66222300 | 3.09735400  | 1.09456900  | H | 4.81705200  | -2.72896800 | 1.97742800  |
| C | -0.96167700 | 4.64930800  | -1.12014700 | C | -2.32232500 | -1.53880800 | -0.07582900 |
| H | 0.13945200  | 2.93877000  | -1.78584900 | C | -2.72944500 | -2.10394500 | 1.14201800  |
| C | -2.13954900 | 4.39312100  | 0.98498400  | C | -3.19424300 | -1.57024600 | -1.17404300 |
| H | -1.94582300 | 2.49605200  | 1.95414000  | C | -3.97059100 | -2.72831000 | 1.24577400  |
| C | -1.79193900 | 5.18569100  | -0.12433000 | H | -2.08839300 | -2.03772600 | 2.01573900  |
| H | -0.70115900 | 5.22627800  | -1.99935500 | H | -4.43111000 | -2.20368700 | -1.07178800 |
| H | -2.79017500 | 4.81869100  | 1.74177100  | H | -2.90441600 | -1.10540700 | -2.11195100 |
| C | -2.23871100 | -2.18900600 | -0.08973200 | C | -4.81759100 | -2.78621800 | 0.13687600  |
| C | -3.53466600 | -1.89891000 | 0.37760100  | H | -4.28716700 | -3.15365200 | 2.19209300  |
| C | -2.01693600 | -3.46705800 | -0.65346800 | H | -5.10000100 | -2.23165200 | -1.92502300 |
| C | -4.56502900 | -2.82754600 | 0.30145000  | C | -0.25669700 | 2.97579900  | -0.04170100 |
| H | -3.74057600 | -0.94198900 | 0.84751100  | C | -1.36182700 | 3.58942200  | -0.66096600 |
| C | -3.03472000 | -4.39557700 | -0.74847000 | C | 0.69035200  | 3.78592200  | 0.61077900  |
| H | -1.04348100 | -3.72364800 | -1.05939400 | C | -1.51202400 | 4.97073600  | -0.63258700 |
| C | -4.32350100 | -4.08890000 | -0.26919900 | H | -2.08847700 | 2.99035100  | -1.20124100 |
| H | -5.54296300 | -2.57059300 | 0.69023500  | C | 0.53204700  | 5.16698400  | 0.65208300  |
| H | -2.86949000 | -5.36886300 | -1.19823100 | H | 1.53653800  | 3.33800700  | 1.12240700  |
| C | 2.52323700  | 2.70026600  | -0.06167100 | C | -0.56787600 | 5.76110500  | 0.02914100  |
| H | 1.85680900  | 3.55994100  | -0.13595300 | H | -2.35423000 | 5.43760700  | -1.13183600 |
| H | 3.48184100  | 3.05104200  | 0.33578000  | H | 1.26095700  | 5.78368500  | 1.16603800  |
| H | 2.70620000  | 2.30789900  | -1.06627400 | C | 0.07756500  | -3.72835700 | 0.62808600  |
| C | 1.56705500  | 2.17680000  | 2.25205600  | H | -0.99488700 | -3.89235300 | 0.73611300  |
| H | 2.45116200  | 2.61750700  | 2.72480000  | H | 0.54338500  | -4.69575400 | 0.41330500  |
| H | 0.80558000  | 2.95495100  | 2.17796800  | H | 0.48056100  | -3.37187400 | 1.58099500  |
| H | 1.20160000  | 1.38002000  | 2.90806900  | C | -0.22032400 | -3.17497400 | -1.86084600 |
| O | 6.43245600  | -2.76904800 | -0.01672100 | H | 0.19381200  | -4.14581400 | -2.15219500 |
| O | -2.31215800 | 6.43098700  | -0.14008700 | H | -1.30395000 | -3.28112000 | -1.80271300 |
| O | -5.24325200 | -5.06172000 | -0.40434300 | H | 0.02949000  | -2.45869900 | -2.65034400 |
| C | -6.58005700 | -4.82671600 | 0.04209300  | C | -6.13856500 | -3.51529400 | 0.23979500  |
| H | -7.12749000 | -5.74258700 | -0.18022700 | C | 6.78467700  | -2.35126100 | 0.14468200  |
| H | -6.60795200 | -4.63541000 | 1.12103200  | F | -5.98063000 | -4.82873300 | -0.02331600 |
| H | -7.03388800 | -3.98732400 | -0.49724400 | F | -7.03767700 | -3.02939900 | -0.63650500 |
| C | 7.41053100  | -2.35568700 | -0.97077000 | F | -6.65895700 | -3.40953600 | 1.47746500  |
| H | 7.65092300  | -1.29205000 | -0.85591300 | F | 7.31621000  | -2.56054500 | -1.07452800 |
| H | 8.29689300  | -2.95397900 | -0.75963800 | F | 6.91035600  | -3.48723100 | 0.85776400  |
| H | 7.07266300  | -2.55137500 | -1.99533800 | F | 7.52348900  | -1.40347600 | 0.75539600  |
| C | -2.01514400 | 7.29212800  | -1.23854500 | C | -0.77286300 | 7.25719500  | 0.11331900  |
| H | -2.38419000 | 6.87290000  | -2.18219200 | F | 0.39246200  | 7.90482100  | 0.30027000  |
| H | -2.53537000 | 8.22659600  | -1.02773700 | F | -1.58456200 | 7.56881200  | 1.14387700  |
| H | -0.93773600 | 7.48203200  | -1.31350500 | F | -1.34230100 | 7.73445400  | -1.01024000 |

**Ar=4-CF3-Ph, R=iPr**

Zero-point correction= 0.444179 (Hartree/Particle)

Thermal correction to Energy= 0.478098

Thermal correction to Enthalpy= 0.479042

Thermal correction to Gibbs Free Energy= 0.371437

Sum of electronic and zero-point Energies= -2070.432945

Sum of electronic and thermal Energies= -2070.399026

Sum of electronic and thermal Enthalpies= -2070.398082

Sum of electronic and thermal Free Energies= -2070.505687

Single-point electronic energy (M06) = -2070.36886974

|   |             |             |             |
|---|-------------|-------------|-------------|
| C | 0.41846100  | -2.78173900 | -0.52544800 |
| H | 1.49480300  | -2.82543000 | -0.66887700 |
| C | 1.30295200  | -0.48535500 | -0.12051600 |
| C | -1.06206600 | -0.73617600 | -0.14524000 |
| C | 1.16048500  | 0.89358600  | -0.06820500 |
| C | -1.20070400 | 0.64389300  | -0.09856700 |
| C | -0.09767600 | 1.51205400  | -0.08045300 |
| H | 2.06744900  | 1.48446400  | -0.03010000 |
| H | -2.20790200 | 1.03585500  | -0.02679800 |
| N | 0.19278600  | -1.30172900 | -0.20214200 |
| C | 2.68574500  | -1.04464700 | -0.08011300 |
| C | 3.57237800  | -0.77260800 | -1.13262500 |
| C | 3.14418500  | -1.74926300 | 1.04540100  |
| C | 4.89127600  | -1.21836900 | -1.07141400 |

**Ar=4-F-Ph, R=iPr**

Zero-point correction= 0.405660 (Hartree/Particle)

Thermal correction to Energy= 0.430951

Thermal correction to Enthalpy= 0.431895

Thermal correction to Gibbs Free Energy= 0.348316

Sum of electronic and zero-point Energies= -1357.071317

Sum of electronic and thermal Energies= -1357.046026

Sum of electronic and thermal Enthalpies= -1357.045081

Sum of electronic and thermal Free Energies= -1357.128661

Single-point electronic energy (M06) = -1356.99265502

|   |             |             |             |
|---|-------------|-------------|-------------|
| C | -0.06431300 | -2.61396400 | 0.54188000  |
| H | -1.12567400 | -2.78228900 | 0.70452900  |
| C | -1.23455200 | -0.46722300 | 0.04997200  |
| C | 1.14689700  | -0.42141300 | 0.05436000  |
| C | -1.26170200 | 0.91824500  | -0.00880900 |
| C | 1.11125800  | 0.96378100  | -0.00015800 |
| C | -0.09122300 | 1.69232700  | -0.00341100 |
| H | -2.23589200 | 1.38920700  | -0.05051300 |
| H | 2.06152400  | 1.47387200  | -0.09742900 |
| N | -0.02903400 | -1.13925500 | 0.13589800  |
| C | -2.53323800 | -1.19396800 | 0.01513200  |
| C | -3.49008100 | -0.94992800 | 1.01477200  |
| C | -2.86660300 | -2.03647200 | -1.06097200 |
| C | -4.74410200 | -1.55271900 | 0.96070700  |



|   |             |             |             |
|---|-------------|-------------|-------------|
| H | -3.24738300 | -0.29712000 | 1.84823000  |
| C | -4.12006300 | -2.63577400 | -1.12995000 |
| H | -2.15298000 | -2.20743600 | -1.86133200 |
| C | -5.03959500 | -2.38739200 | -0.11316500 |
| H | -5.48876700 | -1.38422600 | 1.73100100  |
| H | -4.39717400 | -3.27885600 | -1.95820100 |
| C | 2.48983600  | -1.06694900 | -0.02951200 |
| C | 2.91676200  | -1.67524700 | -1.22118100 |
| C | 3.40734000  | -0.90689900 | 1.02214800  |
| C | 4.21859000  | -2.15412200 | -1.34733300 |
| H | 2.23824700  | -1.75736700 | -2.06463400 |
| C | 4.70822800  | -1.39115500 | 0.91221100  |
| H | 3.09876200  | -0.41235100 | 1.93876300  |
| C | 5.09289800  | -2.01124200 | -0.27349700 |
| H | 4.56531800  | -2.62012700 | -2.26331200 |
| H | 5.42298800  | -1.28868600 | 1.72149800  |
| C | -0.11696200 | 3.16001500  | -0.04197300 |
| C | 0.94331500  | 3.91037100  | 0.50657700  |
| C | -1.19964800 | 3.85195600  | -0.62264700 |
| C | 0.92481900  | 5.29867200  | 0.48642700  |
| H | 1.77578500  | 3.40736000  | 0.98846100  |
| C | -1.22501400 | 5.23984700  | -0.66128700 |
| H | -2.01455800 | 3.30424000  | -1.08527700 |
| C | -0.16102200 | 5.94455600  | -0.10159900 |
| H | 1.72676500  | 5.88561200  | 0.92054800  |
| H | -2.04410600 | 5.78190300  | -1.12102400 |
| C | 0.38281600  | -3.58588100 | -0.55297300 |
| H | 1.46744600  | -3.63909200 | -0.64990300 |
| H | 0.02171900  | -4.58347700 | -0.28142400 |
| H | -0.04802600 | -3.33254300 | -1.52630100 |
| C | 0.63170900  | -2.84348000 | 1.88725300  |
| H | 0.35288200  | -3.84225400 | 2.23905800  |
| H | 1.71964200  | -2.80800000 | 1.81738500  |
| H | 0.29632400  | -2.12161300 | 2.63902500  |
| F | 6.34270200  | -2.47286600 | -0.38870300 |
| F | -0.18220200 | 7.27937400  | -0.13014300 |
| F | -6.24357700 | -2.96513200 | -0.17429300 |

**Ar=3,5-diF-Ph, R=iPr**

|                                              |                |                    |             |
|----------------------------------------------|----------------|--------------------|-------------|
| Zero-point correction=                       | 0.380299       | (Hartree/Particle) |             |
| Thermal correction to Energy=                | 0.408346       |                    |             |
| Thermal correction to Enthalpy=              | 0.409290       |                    |             |
| Thermal correction to Gibbs Free Energy=     | 0.318636       |                    |             |
| Sum of electronic and zero-point Energies=   | -1654.780871   |                    |             |
| Sum of electronic and thermal Energies=      | -1654.752824   |                    |             |
| Sum of electronic and thermal Enthalpies=    | -1654.751880   |                    |             |
| Sum of electronic and thermal Free Energies= | -1654.842533   |                    |             |
| Single-point electronic energy (M06) =       | -1654.70520829 |                    |             |
| C                                            | 0.45742700     | -2.62529800        | -0.55420600 |
| H                                            | 1.52493100     | -2.62398800        | -0.75863400 |
| C                                            | 1.29007300     | -0.31927900        | -0.10149600 |
| C                                            | -1.06498500    | -0.63022500        | -0.06166900 |
| C                                            | 1.11760200     | 1.05319000         | -0.00744500 |
| C                                            | -1.23657200    | 0.74426100         | 0.02745200  |
| C                                            | -0.15550600    | 1.63872200         | 0.03323700  |
| H                                            | 2.01089900     | 1.66505700         | 0.01750800  |
| H                                            | -2.25041100    | 1.10815600         | 0.13998500  |
| N                                            | 0.20012600     | -1.16199800        | -0.17429600 |
| C                                            | 2.68609300     | -0.84894300        | -0.11348200 |
| C                                            | 3.51659500     | -0.56405600        | -1.20540200 |
| C                                            | 3.18751000     | -1.53322300        | 1.00368900  |
| C                                            | 4.84127100     | -0.99441200        | -1.16409500 |
| H                                            | 3.15613000     | -0.03033400        | -2.07778200 |
| C                                            | 4.52096800     | -1.93263600        | 0.99462000  |
| H                                            | 2.57872600     | -1.73654000        | 1.87730800  |
| C                                            | 5.37064300     | -1.68034800        | -0.07719100 |
| C                                            | -2.30335700    | -1.46502400        | 0.02418800  |
| C                                            | -2.62843900    | -2.10557300        | 1.22722400  |
| C                                            | -3.21793200    | -1.44767800        | -1.03778000 |
| C                                            | -3.85836300    | -2.75247800        | 1.32774700  |
| H                                            | -1.96753500    | -2.09068800        | 2.08609600  |

|   |             |             |             |
|---|-------------|-------------|-------------|
| C | -4.42993900 | -2.11684800 | -0.88665100 |
| H | -3.00340900 | -0.94094800 | -1.97214300 |
| C | -4.77694200 | -2.77996300 | 0.28520200  |
| C | -0.34871700 | 3.09776600  | 0.10867100  |
| C | -1.50145500 | 3.68289300  | -0.44370300 |
| C | 0.61652800  | 3.91040400  | 0.72831600  |
| C | -1.65831000 | 5.06162400  | -0.37088200 |
| H | -2.25479700 | 3.10021900  | -0.96107500 |
| C | 0.40433600  | 5.28253200  | 0.78681200  |
| H | 1.50177700  | 3.50172400  | 1.20133200  |
| C | -0.72288500 | 5.88882900  | 0.24211200  |
| C | 0.21711100  | -3.61444200 | 0.58837400  |
| H | -0.84137400 | -3.81657300 | 0.75371000  |
| H | 0.70004900  | -4.55912300 | 0.31763800  |
| H | 0.66514100  | -3.27215800 | 1.52592100  |
| C | -0.24274700 | -3.00384600 | -1.86228700 |
| H | 0.18949800  | -3.94939700 | -2.20588000 |
| H | -1.31664500 | -3.15248400 | -1.74684400 |
| H | -0.06567200 | -2.25668100 | -2.64274000 |
| H | -5.72873300 | -3.28846700 | 0.38510000  |
| H | -0.86671700 | 6.96173600  | 0.29370900  |
| H | 6.40576100  | -2.00104500 | -0.06284600 |
| F | -2.74860700 | 5.61349600  | -0.91453100 |
| F | 1.31780500  | 6.04792300  | 1.39382300  |
| F | -5.29352600 | -2.11393900 | -1.90730200 |
| F | -4.16574000 | -3.36249600 | 2.47747200  |
| F | 5.00172500  | -2.57965200 | 2.06126100  |
| F | 5.63072600  | -0.73424100 | -2.21054800 |

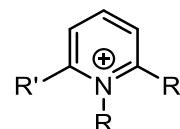

**R'=H, R=iPr**

|                                              |             |                    |             |
|----------------------------------------------|-------------|--------------------|-------------|
| Zero-point correction=                       | 0.187629    | (Hartree/Particle) |             |
| Thermal correction to Energy=                | 0.196252    |                    |             |
| Thermal correction to Enthalpy=              | 0.197196    |                    |             |
| Thermal correction to Gibbs Free Energy=     | 0.154015    |                    |             |
| Sum of electronic and zero-point Energies=   | -366.424419 |                    |             |
| Sum of electronic and thermal Energies=      | -366.415795 |                    |             |
| Sum of electronic and thermal Enthalpies=    | -366.414851 |                    |             |
| Sum of electronic and thermal Free Energies= | -366.458032 |                    |             |
| Single-point electronic energy (M06) =       | -366.45126  |                    |             |
| C                                            | 1.62104700  | -0.42034000        | 0.00020400  |
| H                                            | 1.72052000  | -1.50866500        | 0.00071900  |
| C                                            | -0.72262200 | -1.25056600        | 0.00033900  |
| C                                            | -0.36985600 | 1.07151300         | -0.00035000 |
| C                                            | -2.09675600 | -1.07152900        | 0.00029400  |
| C                                            | -1.73397500 | 1.30756900         | -0.00041500 |
| C                                            | -2.61547200 | 0.22389800         | -0.00012700 |
| H                                            | -2.74270100 | -1.94229700        | 0.00055900  |
| H                                            | -2.09320500 | 2.33051900         | -0.00067500 |
| N                                            | 0.11934400  | -0.19124400        | -0.00002400 |
| C                                            | 2.24072600  | 0.13607300         | -1.28328700 |
| H                                            | 2.18829800  | 1.22899900         | -1.32638700 |
| H                                            | 3.29854400  | -0.14166800        | -1.30874900 |
| H                                            | 1.76028100  | -0.27631600        | -2.17558400 |
| C                                            | 2.24033900  | 0.13738600         | 1.28331300  |
| H                                            | 3.29828600  | -0.13982500        | 1.30916000  |
| H                                            | 2.18730600  | 1.23032600         | 1.32545300  |
| H                                            | 1.75993600  | -0.27446500        | 2.17588100  |
| H                                            | -0.26301700 | -2.23158800        | 0.00070100  |
| H                                            | 0.35819900  | 1.87229700         | -0.00057600 |
| H                                            | -3.68844300 | 0.38737000         | -0.00015800 |

**R'=Me, R=iPr**

|                                            |             |                    |
|--------------------------------------------|-------------|--------------------|
| Zero-point correction=                     | 0.244505    | (Hartree/Particle) |
| Thermal correction to Energy=              | 0.255900    |                    |
| Thermal correction to Enthalpy=            | 0.256845    |                    |
| Thermal correction to Gibbs Free Energy=   | 0.208319    |                    |
| Sum of electronic and zero-point Energies= | -445.000191 |                    |

Sum of electronic and thermal Energies= -444.988796  
 Sum of electronic and thermal Enthalpies= -444.987852  
 Sum of electronic and thermal Free Energies= -445.036377  
 Single-point electronic energy (M06) = -445.03993666  
 C -1.51133500 0.57047100 0.08059200  
 H -1.43476500 1.61302000 0.36859200  
 C 0.92084000 1.08497900 0.07546100  
 C 0.28576900 -1.22103900 -0.03737600  
 C 2.26179400 0.71847100 0.04268200  
 C 1.63143000 -1.57978200 -0.07395800  
 C 2.63081500 -0.61863500 -0.02631000  
 H 3.01132600 1.50054600 0.06842500  
 H 1.87835300 -2.63291600 -0.14211100  
 N -0.05411900 0.10877900 0.05078600  
 C -2.12584200 0.53626600 -1.32365200  
 H -2.26369900 -0.47555400 -1.71141100  
 H -3.11192100 1.00935900 -1.27983800  
 H -1.51610800 1.09602700 -2.03988800  
 C -2.35973100 -0.08875800 1.17644800  
 H -3.20941600 0.57371000 1.36963800  
 H -2.76886600 -1.05959200 0.89807500  
 H -1.80389700 -0.18756300 2.11433200  
 H 3.67750300 -0.90500600 -0.05185300  
 C 0.57056000 2.55042000 0.13437400  
 H -0.07257000 2.86240400 -0.69472800  
 H 0.07541600 2.82143800 1.07399900  
 H 1.49051600 3.13434700 0.07302600  
 C -0.73880400 -2.32379000 -0.07529900  
 H -1.11444000 -2.54554900 0.92896300  
 H -1.59140800 -2.10760000 -0.71742500  
 H -0.26017000 -3.23014500 -0.45107300

**R'=Ph, R=iPr**  
 Zero-point correction= 0.349475 (Hartree/Particle)  
 Thermal correction to Energy= 0.367456  
 Thermal correction to Enthalpy= 0.368400  
 Thermal correction to Gibbs Free Energy= 0.302538  
 Sum of electronic and zero-point Energies= -828.369655  
 Sum of electronic and thermal Energies= -828.351674  
 Sum of electronic and thermal Enthalpies= -828.350730  
 Sum of electronic and thermal Free Energies= -828.416592  
 Single-point electronic energy (M06) = -828.30120941  
 C -0.14094100 -1.15603900 0.63460200  
 H -1.20649600 -1.27325400 0.81190800  
 C -1.26314000 0.92554300 -0.14643800  
 C 1.12890500 0.91958900 -0.12835200  
 C -1.26032400 2.29563500 -0.40185100  
 C 1.12613400 2.29106000 -0.37872800  
 C -0.06548600 2.99662100 -0.49377700  
 H -2.21520700 2.78743400 -0.54436900  
 H 2.08399200 2.78211300 -0.50341700  
 N -0.06806700 0.25856700 0.04078100  
 C -2.57446400 0.22350200 -0.09508600  
 C -3.52406600 0.61195000 0.86376800  
 C -2.91811100 -0.74074100 -1.05875700  
 C -4.78762200 0.02219200 0.87562700  
 H -3.26805600 1.36267000 1.60632300  
 C -4.18669100 -1.31662700 -1.04772900  
 H -2.20530200 -1.01877900 -1.82962500  
 C -5.12024600 -0.94095500 -0.07856100  
 H -5.51180300 0.31897900 1.62803200  
 H -4.44882600 -2.05235000 -1.80189700  
 H -6.10719800 -1.39344300 -0.07212600  
 C 2.45730900 0.24101400 -0.09524800  
 C 2.88096900 -0.53995800 -1.18181600  
 C 3.36227700 0.53584900 0.93703600  
 C 4.17792300 -1.05304200 -1.21077000  
 H 2.20841100 -0.72609100 -2.01371500  
 C 4.65329900 0.00994400 0.90818200  
 H 3.05123500 1.16512700 1.76642900  
 C 5.06168900 -0.78706300 -0.16341300  
 H 4.49898400 -1.65136700 -2.05800600

H 5.34115400 0.23049200 1.71871000  
 H 6.07011400 -1.18868900 -0.18838500  
 C 0.28282900 -2.26947600 -0.32592600  
 H 1.36562000 -2.36993800 -0.40094700  
 H -0.11607300 -3.21193200 0.06382900  
 H -0.13120100 -2.12576900 -1.32822900  
 C 0.54714600 -1.22301900 2.00130000  
 H 0.24385600 -2.16188200 2.47631200  
 H 1.63544100 -1.22014100 1.93378100  
 H 0.22479500 -0.40394600 2.65243400  
 H -0.06130500 4.06491300 -0.68689500

**R'=CF3, R=iPr**  
 Zero-point correction= 0.197608 (Hartree/Particle)  
 Thermal correction to Energy= 0.212919  
 Thermal correction to Enthalpy= 0.213863  
 Thermal correction to Gibbs Free Energy= 0.155269  
 Sum of electronic and zero-point Energies= -1040.434091  
 Sum of electronic and thermal Energies= -1040.418780  
 Sum of electronic and thermal Enthalpies= -1040.417836  
 Sum of electronic and thermal Free Energies= -1040.476430  
 Single-point electronic energy (M06) = -1040.45563053  
 C -0.10509600 -1.56761400 -0.03604100  
 H -1.12617200 -1.77115800 0.24831800  
 H -1.25262700 0.67234100 0.00183600  
 C 1.10041700 0.73391900 -0.06585600  
 C -1.31456400 2.05747800 -0.07043500  
 C 1.06492400 2.12356700 -0.14204000  
 C -0.14560500 2.80101500 -0.15327200  
 H -2.28313100 2.53827400 -0.06037000  
 H 2.00038300 2.66345300 -0.18910100  
 N -0.05569800 -0.00159600 -0.00343700  
 C 0.08133800 -2.06085300 -1.47377200  
 H 1.08361800 -1.88725100 -1.86097200  
 H -0.09763200 -3.14112000 -1.47203100  
 H -0.65139400 -1.60656200 -2.14539200  
 C 0.74327200 -2.25930300 1.03377000  
 H 0.32720900 -3.26691300 1.13630100  
 H 1.79368000 -2.36727400 0.77717100  
 H 0.64950600 -1.77010300 2.00705300  
 H -0.17654400 3.88385100 -0.21654200  
 C -2.60268700 -0.06816800 0.10622200  
 C 2.51628300 0.12671900 0.04966300  
 F 3.41991600 1.04982200 -0.30139300  
 F 2.71273100 -0.93697700 -0.73786800  
 F 2.74995400 -0.21645700 1.32377400  
 F -3.60180000 0.81688600 0.10313300  
 F -2.67570700 -0.77135800 1.24687500  
 F -2.78771200 -0.89954200 -0.93327900

**R'=Cl, R=iPr**  
 Zero-point correction= 0.167769 (Hartree/Particle)  
 Thermal correction to Energy= 0.178798  
 Thermal correction to Enthalpy= 0.179742  
 Thermal correction to Gibbs Free Energy= 0.129988  
 Sum of electronic and zero-point Energies= -1285.598651  
 Sum of electronic and thermal Energies= -1285.587622  
 Sum of electronic and thermal Enthalpies= -1285.586678  
 Sum of electronic and thermal Free Energies= -1285.636432  
 Single-point electronic energy (M06) = -1285.60750590  
 C 0.35944200 -1.57454800 -0.00000200  
 H -0.59527600 -2.08780100 0.00000000  
 C -1.40101500 0.24703000 0.00003000  
 C 0.84454000 0.94267500 0.00006400  
 C -1.83394300 1.56597100 0.00000600  
 C 0.45255900 2.27534200 0.00001800  
 C -0.89932500 2.59384400 0.00000000  
 H -2.89881800 1.76321000 -0.00002900  
 H 1.21957700 3.04003900 -0.00001100  
 N -0.06514900 -0.08503400 0.00005300  
 C 1.06706400 -1.96253000 -1.30132800  
 H 2.08880200 -1.59118300 -1.37695500  
 H 1.10891100 -3.05626300 -1.32920100

|    |             |             |             |
|----|-------------|-------------|-------------|
| H  | 0.49911600  | -1.63272900 | -2.17673300 |
| C  | 1.06711100  | -1.96266700 | 1.30126000  |
| H  | 1.10879900  | -3.05640800 | 1.32907300  |
| H  | 2.08890700  | -1.59147600 | 1.37684700  |
| H  | 0.49926500  | -1.63283500 | 2.17672100  |
| H  | -1.22096800 | 3.63042300  | -0.00003600 |
| Cl | 2.53571300  | 0.62721800  | -0.00001100 |
| Cl | -2.61694000 | -0.97665600 | -0.00001000 |

**R'=tBu, R=iPr**

Zero-point correction= 0.415506 (Hartree/Particle)  
 Thermal correction to Energy= 0.434517  
 Thermal correction to Enthalpy= 0.435461

Thermal correction to Gibbs Free Energy= 0.371382  
 Sum of electronic and zero-point Energies= -680.662476  
 Sum of electronic and thermal Energies= -680.643465  
 Sum of electronic and thermal Enthalpies= -680.642520  
 Sum of electronic and thermal Free Energies= -680.706599  
 Single-point electronic energy (M06) = -680.75017227

|   |             |             |             |
|---|-------------|-------------|-------------|
| C | -0.13680500 | -1.52032800 | 0.57768600  |
| H | -1.20620100 | -1.66420300 | 0.60546600  |
| C | -1.25385600 | 0.62485200  | 0.10146600  |
| C | 1.17181400  | 0.66430700  | 0.15103400  |
| C | -1.27023500 | 1.97010100  | 0.46692800  |
| C | 1.11041100  | 1.99841400  | 0.54133000  |
| C | -0.09934900 | 2.63552000  | 0.78284600  |
| H | -2.21230000 | 2.49456100  | 0.51600100  |
| H | 2.02622000  | 2.55789000  | 0.64938300  |
| N | -0.03494300 | -0.04579200 | 0.11577300  |
| C | 0.39475900  | -2.64056300 | -0.31856100 |
| H | 1.47661200  | -2.74428400 | -0.33706100 |
| H | -0.01023300 | -3.57442400 | 0.08756100  |
| H | 0.03297300  | -2.55161700 | -1.34465300 |
| C | 0.31476500  | -1.59334700 | 2.04465300  |
| H | 0.08696700  | -2.59616300 | 2.42092200  |
| H | 1.38047100  | -1.41832000 | 2.18586900  |
| H | -0.23899600 | -0.87373300 | 2.65589200  |
| H | -0.12197700 | 3.66035600  | 1.14057900  |
| C | -2.60780500 | -0.02387100 | -0.33651200 |
| C | 2.53637700  | 0.11747300  | -0.37503800 |
| C | -3.48421500 | 1.08652800  | -0.99077600 |
| H | -4.36444200 | 0.61104800  | -1.43125500 |
| H | -3.85897300 | 1.81942900  | -0.27185000 |
| H | -2.95424300 | 1.61469300  | -1.79005900 |
| C | -3.40931900 | -0.56181000 | 0.87880000  |
| H | -2.93917900 | -1.41587500 | 1.37628700  |
| H | -3.56036900 | 0.22075600  | 1.62964800  |
| H | -4.39577800 | -0.89052200 | 0.53613200  |
| C | -2.44813600 | -1.11442200 | -1.42908400 |
| H | -1.76172900 | -0.79355400 | -2.22004700 |
| H | -2.11842600 | -2.08364200 | -1.05405000 |
| H | -3.42328100 | -1.28469300 | -1.89327100 |
| C | 2.31881000  | -0.42789100 | -1.81266000 |
| H | 1.58620600  | -1.22812100 | -1.87734700 |
| H | 1.99563500  | 0.37792600  | -2.48073400 |
| H | 3.26962300  | -0.81262800 | -2.19515600 |
| C | 3.26070000  | -0.89723200 | 0.54455700  |
| H | 3.41723800  | -0.47347400 | 1.54241200  |
| H | 2.75905100  | -1.85498000 | 0.65623600  |
| H | 4.24796000  | -1.10283500 | 0.11953300  |
| C | 3.54581100  | 1.28810900  | -0.53691400 |
| H | 3.15774900  | 2.09665200  | -1.16374300 |
| H | 3.87513300  | 1.70191800  | 0.42176100  |
| H | 4.43651700  | 0.89333300  | -1.03338800 |

**R'=H, R=Et**

Zero-point correction= 0.159686 (Hartree/Particle)  
 Thermal correction to Energy= 0.166904  
 Thermal correction to Enthalpy= 0.167848  
 Thermal correction to Gibbs Free Energy= 0.127795  
 Sum of electronic and zero-point Energies= -327.134949

Sum of electronic and thermal Energies= -327.127731  
 Sum of electronic and thermal Enthalpies= -327.126787  
 Sum of electronic and thermal Free Energies= -327.166841  
 Single-point electronic energy (M06) = -327.15652389

|   |             |             |             |
|---|-------------|-------------|-------------|
| C | -1.87767400 | -0.00001200 | -0.58172100 |
| H | -2.08811300 | 0.88200600  | -1.19042900 |
| C | 0.25323100  | 1.17700000  | -0.18319200 |
| C | 0.25324200  | -1.17700700 | -0.18318400 |
| C | 1.60836300  | 1.20487100  | 0.10036900  |
| C | 1.60837200  | -1.20486300 | 0.10037800  |
| C | 2.29995400  | 0.00000800  | 0.24479900  |
| H | 2.10790100  | 2.16186400  | 0.20088100  |
| H | 2.10792000  | -2.16185100 | 0.20089700  |
| N | -0.40170300 | -0.00000600 | -0.32205900 |
| C | -2.68159800 | 0.00001000  | 0.71626200  |
| H | -3.74745600 | -0.00001400 | 0.46933900  |
| H | -2.47320600 | -0.88951800 | 1.31879400  |
| H | -2.47323700 | 0.88957500  | 1.31874900  |
| H | 3.36296900  | 0.00001200  | 0.46370400  |
| H | -2.08811300 | -0.88205200 | -1.19039600 |
| H | -0.34003500 | -2.07506000 | -0.30969300 |
| H | -0.34005200 | 2.07504700  | -0.30970700 |

**R'=Me, R=Et**

Zero-point correction= 0.216267 (Hartree/Particle)  
 Thermal correction to Energy= 0.226207  
 Thermal correction to Enthalpy= 0.227151

Thermal correction to Gibbs Free Energy= 0.181907  
 Sum of electronic and zero-point Energies= -405.721663  
 Sum of electronic and thermal Energies= -405.711723  
 Sum of electronic and thermal Enthalpies= -405.710779  
 Sum of electronic and thermal Free Energies= -405.756023  
 Single-point electronic energy (M06) = -405.75481765

|   |             |             |             |
|---|-------------|-------------|-------------|
| C | 1.76138500  | 0.00013300  | -0.46706700 |
| H | 1.99272000  | 0.87375600  | -1.07385200 |
| C | -0.37454700 | 1.20042900  | -0.10641300 |
| C | -0.37444000 | -1.20048000 | -0.10650500 |
| C | -1.73985700 | 1.19837200  | 0.15791400  |
| C | -1.73975400 | -1.19856800 | 0.15779700  |
| C | -2.43177300 | -0.00013700 | 0.29395900  |
| H | -2.25024200 | 2.14970300  | 0.25324700  |
| H | -2.25002900 | -2.14997100 | 0.25299000  |
| N | 0.28165100  | -0.00001700 | -0.22984200 |
| C | 2.56391000  | 0.00010900  | 0.83554800  |
| H | 2.35650800  | -0.88481100 | 1.44378000  |
| H | 3.63049900  | 0.00004100  | 0.59117500  |
| H | 2.35648400  | 0.88519900  | 1.44351400  |
| H | -3.49723200 | -0.00018900 | 0.50160500  |
| C | 0.36752600  | 2.49703100  | -0.27939700 |
| H | 1.24107200  | 2.57446200  | 0.37390100  |
| H | 0.70617600  | 2.63005900  | -1.31423300 |
| H | -0.30039600 | 3.32724400  | -0.04409900 |
| C | 0.36785500  | -2.49698100 | -0.27936300 |
| H | 0.70807300  | -2.62951700 | -1.31370700 |
| H | 1.24047400  | -2.57459900 | 0.37521100  |
| H | -0.30030700 | -3.32737500 | -0.04540400 |
| H | 1.99280800  | -0.87332200 | -1.07406700 |

**R'=Ph, R=Et**

Zero-point correction= 0.321466 (Hartree/Particle)  
 Thermal correction to Energy= 0.338017  
 Thermal correction to Enthalpy= 0.338961

Thermal correction to Gibbs Free Energy= 0.276033  
 Sum of electronic and zero-point Energies= -789.091504  
 Sum of electronic and thermal Energies= -789.074953  
 Sum of electronic and thermal Enthalpies= -789.074009  
 Sum of electronic and thermal Free Energies= -789.136937  
 Single-point electronic energy (M06) = -789.01510770

|   |             |             |             |
|---|-------------|-------------|-------------|
| C | 0.00000900  | -1.25458800 | 0.38879000  |
| H | -0.88036200 | -1.72917800 | -0.03413700 |
| C | -1.19980500 | 0.84868400  | -0.16887700 |
| C | 1.19975800  | 0.84862600  | -0.16900400 |
| C | -1.19779500 | 2.23342100  | -0.32327900 |

|   |             |             |             |
|---|-------------|-------------|-------------|
| C | 1.19784600  | 2.23342500  | -0.32333600 |
| C | 0.00005200  | 2.93731100  | -0.38217000 |
| H | -2.15262300 | 2.73724300  | -0.41590700 |
| H | 2.15271900  | 2.73716300  | -0.41594500 |
| N | 0.00002200  | 0.18329800  | -0.06077700 |
| C | -2.49657800 | 0.12128800  | -0.13186700 |
| C | -3.41709800 | 0.40849800  | 0.88754200  |
| C | -2.85348600 | -0.77026200 | -1.15849100 |
| C | -4.66699100 | -0.21139400 | 0.89540700  |
| H | -3.15177800 | 1.10669900  | 1.67674000  |
| C | -4.10746900 | -1.37717800 | -1.14942700 |
| H | -2.16279500 | -0.96784700 | -1.97432700 |
| C | -5.01265900 | -1.10355300 | -0.12051700 |
| H | -5.36983800 | 0.00729200  | 1.69339700  |
| H | -4.38112700 | -2.05639700 | -1.95097400 |
| H | -5.98833100 | -1.57984200 | -0.11614600 |
| C | 2.49657900  | 0.12127200  | -0.13193300 |
| C | 2.85347900  | -0.77035700 | -1.15849200 |
| C | 3.41705600  | 0.40856400  | 0.88747200  |
| C | 4.10746400  | -1.37725800 | -1.14936700 |
| H | 2.16281200  | -0.96795600 | -1.97434200 |
| C | 4.66695500  | -0.21133900 | 0.89540900  |
| H | 3.15172800  | 1.10683800  | 1.67660300  |
| C | 5.01263000  | -1.10356900 | -0.12043900 |
| H | 4.38115400  | -2.05653500 | -1.95085300 |
| H | 5.36981900  | 0.00742900  | 1.69336200  |
| H | 5.98830300  | -1.57985600 | -0.11600700 |
| C | 0.00000200  | -1.34502100 | 1.91342100  |
| H | -0.00043800 | -2.40093400 | 2.20143500  |
| H | 0.89122900  | -0.87725800 | 2.34189400  |
| H | -0.89082100 | -0.87658200 | 2.34200600  |
| H | 0.00002400  | 4.01631100  | -0.50238300 |
| H | 0.88047100  | -1.72910300 | -0.03403300 |

**R'=CF3, R=Et**

|                                              |                             |             |             |
|----------------------------------------------|-----------------------------|-------------|-------------|
| Zero-point correction=                       | 0.169566 (Hartree/Particle) |             |             |
| Thermal correction to Energy=                | 0.183430                    |             |             |
| Thermal correction to Enthalpy=              | 0.184374                    |             |             |
| Thermal correction to Gibbs Free Energy=     | 0.128701                    |             |             |
| Sum of electronic and zero-point Energies=   | -1001.157037                |             |             |
| Sum of electronic and thermal Energies=      | -1001.143173                |             |             |
| Sum of electronic and thermal Enthalpies=    | -1001.142229                |             |             |
| Sum of electronic and thermal Free Energies= | -1001.197902                |             |             |
| Single-point electronic energy (M06) =       | -1001.17246354              |             |             |
| C                                            | 0.00014900                  | -1.61362500 | 0.19921400  |
| H                                            | -0.87289200                 | -1.86313100 | 0.79443800  |
| C                                            | -1.17927200                 | 0.58688400  | -0.05414400 |
| C                                            | 1.17921900                  | 0.58698300  | -0.05412600 |
| C                                            | -1.19671700                 | 1.94958100  | -0.31923100 |
| C                                            | 1.19657300                  | 1.94968200  | -0.31919900 |
| C                                            | -0.00009900                 | 2.64116900  | -0.47513000 |
| H                                            | -2.15049200                 | 2.45520100  | -0.39295100 |
| H                                            | 2.15031000                  | 2.45537300  | -0.39290900 |
| N                                            | 0.00000700                  | -0.09723900 | 0.04651900  |
| C                                            | 0.00030800                  | -2.33461000 | -1.14889800 |
| H                                            | 0.89106500                  | -2.10515100 | -1.73451200 |
| H                                            | 0.00043700                  | -3.40986700 | -0.94235300 |
| H                                            | -0.89045000                 | -2.10537900 | -1.73459600 |
| H                                            | -0.00014000                 | 3.70445500  | -0.69215800 |
| C                                            | -2.52401200                 | -0.12155500 | 0.18987400  |
| C                                            | 2.52396500                  | -0.12143400 | 0.18990000  |
| H                                            | 0.87321900                  | -1.86292100 | 0.79449500  |
| F                                            | -3.51968300                 | 0.75763200  | 0.06644100  |
| F                                            | -2.55787600                 | -0.62627000 | 1.43472400  |
| F                                            | -2.73169700                 | -1.11632000 | -0.68313600 |
| F                                            | 2.55772400                  | -0.62627900 | 1.43469600  |
| F                                            | 2.73169300                  | -1.11613000 | -0.68317700 |
| F                                            | 3.51964000                  | 0.75777200  | 0.06660300  |

**R'=Cl, R=Et**

|                               |                             |  |  |
|-------------------------------|-----------------------------|--|--|
| Zero-point correction=        | 0.140062 (Hartree/Particle) |  |  |
| Thermal correction to Energy= | 0.149424                    |  |  |

|                                              |                |             |             |
|----------------------------------------------|----------------|-------------|-------------|
| Thermal correction to Enthalpy=              | 0.150368       |             |             |
| Thermal correction to Gibbs Free Energy=     | 0.104704       |             |             |
| Sum of electronic and zero-point Energies=   | -1246.317941   |             |             |
| Sum of electronic and thermal Energies=      | -1246.308580   |             |             |
| Sum of electronic and thermal Enthalpies=    | -1246.307635   |             |             |
| Sum of electronic and thermal Free Energies= | -1246.353299   |             |             |
| Single-point electronic energy (M06) =       | -1246.32123574 |             |             |
| C                                            | 0.00007600     | -1.69971600 | -0.44902900 |
| H                                            | -0.87842700    | -1.90745800 | -1.05637400 |
| C                                            | -1.18001500    | 0.47635300  | -0.06483800 |
| C                                            | 1.18003500     | 0.47646000  | -0.06496800 |
| C                                            | -1.20225000    | 1.84455000  | 0.16478900  |
| C                                            | 1.20216100     | 1.84463900  | 0.16466900  |
| C                                            | -0.00007400    | 2.53590800  | 0.27670900  |
| H                                            | -2.15939000    | 2.34367500  | 0.25423900  |
| H                                            | 2.15925400     | 2.34388200  | 0.25397100  |
| N                                            | 0.00003100     | -0.21053800 | -0.19471500 |
| C                                            | 0.00003100     | -2.50231000 | 0.84968700  |
| H                                            | 0.00040000     | -3.56608300 | 0.59247600  |
| H                                            | 0.89031200     | -2.30066700 | 1.45140000  |
| H                                            | -0.89061500    | -2.30106700 | 1.45096600  |
| H                                            | -0.00008900    | 3.60645200  | 0.45569500  |
| Cl                                           | 2.66956800     | -0.37328900 | -0.18364800 |
| Cl                                           | -2.66957300    | -0.37335100 | -0.18370800 |
| H                                            | 0.87864800     | -1.90739100 | -1.05630600 |

**R'=tBu, R=Et**

|                                              |                             |             |             |
|----------------------------------------------|-----------------------------|-------------|-------------|
| Zero-point correction=                       | 0.387499 (Hartree/Particle) |             |             |
| Thermal correction to Energy=                | 0.405072                    |             |             |
| Thermal correction to Enthalpy=              | 0.406016                    |             |             |
| Thermal correction to Gibbs Free Energy=     | 0.344964                    |             |             |
| Sum of electronic and zero-point Energies=   | -641.397653                 |             |             |
| Sum of electronic and thermal Energies=      | -641.380080                 |             |             |
| Sum of electronic and thermal Enthalpies=    | -641.379136                 |             |             |
| Sum of electronic and thermal Free Energies= | -641.440188                 |             |             |
| Single-point electronic energy (M06) =       | -641.47587946               |             |             |
| C                                            | 0.00000600                  | -1.63743400 | -0.16220100 |
| H                                            | 0.86865300                  | -2.01096900 | 0.36230200  |
| C                                            | 1.21831900                  | 0.52161500  | -0.14740800 |
| C                                            | -1.21831700                 | 0.52160500  | -0.14742900 |
| C                                            | 1.19646500                  | 1.84943900  | -0.56728500 |
| C                                            | -1.19642100                 | 1.84950000  | -0.56711000 |
| C                                            | 0.00001900                  | 2.49625900  | -0.83945700 |
| H                                            | 2.12511500                  | 2.38618100  | -0.68125400 |
| H                                            | -2.12505700                 | 2.38629000  | -0.68094300 |
| N                                            | -0.00001300                 | -0.14098000 | -0.06987200 |
| C                                            | 0.00001700                  | -2.09251400 | -1.62369500 |
| H                                            | -0.00002100                 | -3.18739200 | -1.65108300 |
| H                                            | -0.88548100                 | -1.74058400 | -2.15770000 |
| H                                            | 0.88559100                  | -1.74065200 | -2.15761800 |
| C                                            | 0.00002600                  | 3.51760800  | -1.20786400 |
| H                                            | 2.56294200                  | -0.11438600 | 0.32221700  |
| C                                            | -2.56297100                 | -0.11437100 | 0.32219100  |
| C                                            | 3.67155500                  | 0.97110700  | 0.34830700  |
| H                                            | 4.57416000                  | 0.52305700  | 0.77230200  |
| H                                            | 3.93315200                  | 1.32918100  | -0.65278200 |
| H                                            | 3.40901500                  | 1.82671500  | 0.97815800  |
| C                                            | 3.11377000                  | -1.23597700 | -0.60066500 |
| H                                            | 2.55285000                  | -2.17076000 | -0.57257800 |
| H                                            | 3.16808900                  | -0.89744200 | -1.64077900 |
| H                                            | 4.13338700                  | -1.47149300 | -0.28120800 |
| C                                            | 2.41717400                  | -0.59459400 | 1.79404400  |
| H                                            | 2.15204900                  | 0.24273300  | 2.44807600  |
| H                                            | 1.67713100                  | -1.38299900 | 1.94816500  |
| H                                            | 3.38104600                  | -0.98775200 | 2.13158600  |
| C                                            | -2.41710300                 | -0.59455800 | 1.79400900  |
| H                                            | -1.67724000                 | -1.38316200 | 1.94801400  |
| H                                            | -2.15166800                 | 0.24271200  | 2.44799000  |
| H                                            | -3.38102300                 | -0.98746700 | 2.13171400  |
| C                                            | -3.11386200                 | -1.23600700 | -0.60060800 |
| H                                            | -3.16811400                 | -0.89758500 | -1.64076200 |
| H                                            | -2.55308800                 | -2.17086500 | -0.57238400 |

|   |             |             |             |
|---|-------------|-------------|-------------|
| H | -4.13351500 | -1.47135500 | -0.28115000 |
| C | -3.67157600 | 0.97111900  | 0.34826100  |
| H | -3.40899800 | 1.82683200  | 0.97796400  |
| H | -3.93330200 | 1.32904000  | -0.65284800 |
| H | -4.57411500 | 0.52312400  | 0.77246000  |
| H | -0.86865700 | -2.01095500 | 0.36230600  |

### Pyridinium radicals

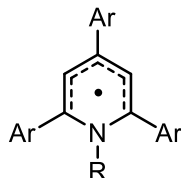

Ar=Ph, R=Cy

|                                              |                             |
|----------------------------------------------|-----------------------------|
| Zero-point correction=                       | 0.493613 (Hartree/Particle) |
| Thermal correction to Energy=                | 0.518218                    |
| Thermal correction to Enthalpy=              | 0.519162                    |
| Thermal correction to Gibbs Free Energy=     | 0.437355                    |
| Sum of electronic and zero-point Energies=   | -1176.191556                |
| Sum of electronic and thermal Energies=      | -1176.166951                |
| Sum of electronic and thermal Enthalpies=    | -1176.166007                |
| Sum of electronic and thermal Free Energies= | -1176.247814                |
| Single-point electronic energy (M06) =       | -1176.07158133              |

|   |             |             |             |
|---|-------------|-------------|-------------|
| C | 0.17309700  | 1.30534000  | -0.31389300 |
| C | -0.00909000 | -1.09951600 | -0.37844000 |
| C | 1.53844600  | 1.19165900  | -0.19956300 |
| C | 1.35317600  | -1.19532000 | -0.23973500 |
| C | 2.19257000  | -0.05969900 | -0.06039200 |
| H | 2.12208800  | 2.10272600  | -0.27019600 |
| H | 1.80412500  | -2.16829300 | -0.40635600 |
| N | -0.66072500 | 0.15530900  | -0.23771800 |
| C | -0.47313500 | 2.60498700  | -0.58352400 |
| C | 0.02007900  | 3.79666000  | -0.01669400 |
| C | -1.58732100 | 2.69417100  | -1.44193200 |
| C | -0.56339800 | 5.02623900  | -0.31247800 |
| H | 0.85353600  | 3.75062000  | 0.67856000  |
| C | -2.17063200 | 3.92476200  | -1.73307400 |
| H | -1.97481700 | 1.78724100  | -1.89587000 |
| C | -1.66210000 | 5.09899400  | -1.17217900 |
| H | -0.16624600 | 5.93054900  | 0.14146200  |
| H | -3.02194800 | 3.96821000  | -2.40773600 |
| C | -0.79933300 | -2.27560000 | -0.80642300 |
| C | -1.70331000 | -2.18437900 | -1.88166200 |
| C | -0.60754200 | -3.53211500 | -0.20454200 |
| C | -2.38694100 | -3.30870900 | -2.33683800 |
| H | -1.85107900 | -1.22343500 | -2.36513900 |
| C | -1.29390000 | -4.65701300 | -0.66088700 |
| H | 0.07609500  | -3.61808300 | 0.63583900  |
| C | -2.18753100 | -4.55130100 | -1.72807700 |
| H | -3.07216800 | -3.21770300 | -3.17581400 |
| H | -1.13500200 | -5.61671600 | -0.17589600 |
| C | 3.64023800  | -0.18782400 | 0.12638500  |
| C | 4.19820400  | -1.37058800 | 0.66147900  |
| C | 4.53611200  | 0.85182800  | -0.20883500 |
| C | 5.57093000  | -1.50713300 | 0.84565800  |
| H | 3.54143400  | -2.18074900 | 0.96453100  |
| C | 5.90790300  | 0.71422100  | -0.02052600 |
| H | 4.15828700  | 1.76872200  | -0.65098900 |
| C | 6.43861400  | -0.46597400 | 0.50722800  |
| H | 5.96469800  | -2.42918900 | 1.26623900  |
| H | 6.56924200  | 1.53148300  | -0.29770400 |
| C | -1.77329600 | 0.26950800  | 0.77820000  |
| C | -3.13889200 | -0.28222500 | 0.34208600  |
| C | -1.35526800 | -0.30484400 | 2.14512700  |
| H | -1.90199000 | 1.34798000  | 0.90492800  |
| C | -4.20192500 | 0.04112600  | 1.40804700  |
| H | -3.08982400 | -1.36638900 | 0.20495600  |
| H | -3.42381000 | 0.15136400  | -0.62381300 |

|   |             |             |             |
|---|-------------|-------------|-------------|
| C | -2.42210900 | -0.00791500 | 3.21232800  |
| H | -1.21679200 | -1.39058200 | 2.05804000  |
| H | -0.38796200 | 0.11907700  | 2.44078300  |
| C | -3.80670300 | -0.51556500 | 2.78431900  |
| H | -5.17125700 | -0.36694900 | 1.09574500  |
| H | -4.33070500 | 1.13132800  | 1.47940300  |
| H | -2.12716800 | -0.45927600 | 4.16809300  |
| H | -2.47123600 | 1.07760100  | 3.38303100  |
| H | -4.55965700 | -0.24452200 | 3.53521400  |
| H | -3.79087300 | -1.61431100 | 2.73731000  |
| H | -2.72390000 | -5.42720500 | -2.08266700 |
| H | 7.51007100  | -0.57155200 | 0.65291300  |
| H | -2.11973200 | 6.05823000  | -1.39782200 |

Ar=4-Me-Ph, R=Cy

|                                              |                             |
|----------------------------------------------|-----------------------------|
| Zero-point correction=                       | 0.576132 (Hartree/Particle) |
| Thermal correction to Energy=                | 0.606473                    |
| Thermal correction to Enthalpy=              | 0.607417                    |
| Thermal correction to Gibbs Free Energy=     | 0.510928                    |
| Sum of electronic and zero-point Energies=   | -1294.063245                |
| Sum of electronic and thermal Energies=      | -1294.032903                |
| Sum of electronic and thermal Enthalpies=    | -1294.031959                |
| Sum of electronic and thermal Free Energies= | -1294.128448                |
| Single-point electronic energy (M06) =       | -1293.95598718              |

|   |             |             |             |
|---|-------------|-------------|-------------|
| C | 0.01789200  | 1.30262200  | -0.22059800 |
| C | -0.06022900 | -1.10960600 | -0.23484800 |
| C | 1.39113900  | 1.25104400  | -0.18760200 |
| C | 1.31116800  | -1.14162600 | -0.17842900 |
| C | 2.10892900  | 0.03239100  | -0.07113700 |
| H | 1.92663200  | 2.18636300  | -0.30718900 |
| H | 1.79423300  | -2.09731700 | -0.35478900 |
| N | -0.75837900 | 0.11860200  | -0.07947400 |
| C | -0.69887800 | 2.56904800  | -0.46622900 |
| C | -0.23813200 | 3.78760200  | 0.06726600  |
| C | -1.85735700 | 2.60820700  | -1.26656900 |
| C | -0.89377600 | 4.98508000  | -0.20424500 |
| H | 0.62768400  | 3.78881800  | 0.72359700  |
| C | -2.50852200 | 3.80918600  | -1.53004300 |
| H | -2.23128100 | 1.68462600  | -1.69784300 |
| C | -2.04004000 | 5.02396500  | -1.00961400 |
| H | -0.51583600 | 5.90783400  | 0.23110500  |
| H | -3.39617700 | 3.80518800  | -2.15948600 |
| C | -0.81960700 | -2.32998100 | -0.58503700 |
| C | -1.79768400 | -2.31358100 | -1.59739500 |
| C | -0.52702500 | -3.56453800 | 0.01853300  |
| C | -2.44847800 | -3.48015300 | -1.98338900 |
| H | -2.02787800 | -1.37507500 | -2.09280400 |
| C | -1.18447600 | -4.73007400 | -0.37276100 |
| H | 0.21735900  | -3.60566900 | 0.80934100  |
| C | -2.15969400 | -4.71267000 | -1.37666600 |
| H | -3.18946600 | -3.43797800 | -2.77931400 |
| H | -0.93882600 | -5.66989200 | 0.11709900  |
| C | 3.56911000  | -0.02929800 | 0.01970000  |
| C | 4.22028400  | -1.17527600 | 0.52547500  |
| C | 4.39736900  | 1.04249400  | -0.38136700 |
| C | 5.60693000  | -1.24511400 | 0.61557300  |
| H | 3.62855500  | -2.01203900 | 0.88525100  |
| C | 5.78164000  | 0.96605000  | -0.28526400 |
| H | 3.95475400  | 1.94093200  | -0.80078500 |
| C | 6.42141200  | -0.17971200 | 0.21075000  |
| H | 6.06713000  | -2.14434800 | 1.02046200  |
| H | 6.38215500  | 1.81299400  | -0.61200900 |
| C | -1.82856400 | 0.20325200  | 0.98260700  |
| C | -3.20499500 | -0.35585500 | 0.58983600  |
| C | -1.35525100 | -0.38564100 | 2.32504800  |
| H | -1.96401000 | 1.27801000  | 1.13239300  |
| C | -4.23175200 | -0.05524500 | 1.69650600  |
| H | -3.15036500 | -1.43784400 | 0.43757200  |
| H | -3.52863000 | 0.08674700  | -0.35956000 |
| C | -2.38637900 | -0.11257600 | 3.43355800  |
| H | -1.20929400 | -1.46854100 | 2.21987900  |

|   |             |             |             |
|---|-------------|-------------|-------------|
| H | -0.38248000 | 0.04514800  | 2.59145400  |
| C | -3.78205100 | -0.62644800 | 3.04950400  |
| H | -5.20873400 | -0.46736800 | 1.41452900  |
| H | -4.36639800 | 1.03288200  | 1.78686300  |
| H | -2.05347000 | -0.57352300 | 4.37217900  |
| H | -2.43857200 | 0.97023600  | 3.62015400  |
| H | -4.50869500 | -0.37180500 | 3.83151900  |
| H | -3.75909200 | -1.72432000 | 2.98708100  |
| C | -2.89343000 | -5.96884600 | -1.78289100 |
| H | -3.00154700 | -6.03604100 | -2.87169000 |
| H | -2.36962900 | -6.86718100 | -1.44037600 |
| H | -3.90580300 | -5.99727900 | -1.35762300 |
| C | 7.92726400  | -0.26640600 | 0.28144300  |
| H | 8.36240200  | -0.51863200 | -0.69559600 |
| H | 8.37186900  | 0.68580900  | 0.59343900  |
| H | 8.25103800  | -1.03687900 | 0.98933400  |
| C | -2.73393300 | 6.32837600  | -1.32275800 |
| H | -2.56725800 | 7.07066500  | -0.53476500 |
| H | -2.36383500 | 6.76313300  | -2.26146700 |
| H | -3.81518900 | 6.19209300  | -1.43536900 |

Ar=4-MeO-Ph, R=Cy

|                                              |                             |
|----------------------------------------------|-----------------------------|
| Zero-point correction=                       | 0.591671 (Hartree/Particle) |
| Thermal correction to Energy=                | 0.624203                    |
| Thermal correction to Enthalpy=              | 0.625147                    |
| Thermal correction to Gibbs Free Energy=     | 0.525122                    |
| Sum of electronic and zero-point Energies=   | -1519.660706                |
| Sum of electronic and thermal Energies=      | -1519.628174                |
| Sum of electronic and thermal Enthalpies=    | -1519.627230                |
| Sum of electronic and thermal Free Energies= | -1519.727255                |
| Single-point electronic energy (M06) =       | -1519.5551246               |

|   |             |             |             |
|---|-------------|-------------|-------------|
| C | 0.21439900  | -1.31653800 | -0.13807300 |
| C | -0.04874400 | 1.08386000  | -0.12214800 |
| C | -1.15047600 | -1.45798700 | -0.22004700 |
| C | -1.41056700 | 0.92275800  | -0.18264200 |
| C | -2.04007100 | -0.35412800 | -0.14414700 |
| H | -1.53920800 | -2.45375400 | -0.40320600 |
| H | -2.00919600 | 1.80160900  | -0.40139000 |
| N | 0.79934000  | -0.03820100 | 0.09713900  |
| C | 1.12820600  | -2.45556400 | -0.34342200 |
| C | 0.79023700  | -3.75935000 | 0.07996400  |
| C | 2.36154700  | -2.29289400 | -0.99703600 |
| C | 1.62746500  | -4.83804400 | -0.15825100 |
| H | -0.13626000 | -3.92048500 | 0.62361100  |
| C | 3.21552800  | -3.36913900 | -1.23948300 |
| H | 2.64573300  | -1.30372200 | -1.34255200 |
| C | 2.85019300  | -4.65451400 | -0.82233700 |
| H | 1.36407200  | -5.83705700 | 0.17549800  |
| H | 4.15125500  | -3.19525400 | -1.75908300 |
| C | 0.56659900  | 2.39818300  | -0.40187800 |
| C | 1.64645100  | 2.52340600  | -1.28990300 |
| C | 0.03899000  | 3.58393700  | 0.14829800  |
| C | 2.18316400  | 3.76648300  | -1.62436500 |
| H | 2.06395000  | 1.62752900  | -1.73931400 |
| C | 0.56256100  | 4.82787500  | -0.17485000 |
| H | -0.78715300 | 3.52068900  | 0.85136000  |
| C | 1.64079000  | 4.93108000  | -1.06577100 |
| H | 3.00990100  | 3.81549900  | -2.32424400 |
| H | 0.15845200  | 5.73789600  | 0.25794000  |
| C | -3.49693700 | -0.49950600 | -0.15791900 |
| C | -4.33681500 | 0.53133300  | 0.30812100  |
| C | -4.13897400 | -1.67033700 | -0.62761500 |
| C | -5.72698300 | 0.41974600  | 0.30611500  |
| H | -3.89519300 | 1.43753700  | 0.71217300  |
| C | -5.51848100 | -1.79600700 | -0.63212600 |
| H | -3.54709300 | -2.48975100 | -1.02398100 |
| C | -6.33067900 | -0.75083100 | -0.16571500 |
| H | -6.32297400 | 1.24268600  | 0.68492500  |
| H | -5.99711100 | -2.69640500 | -1.00548300 |
| C | 1.71903600  | -0.00268600 | 1.29492500  |
| C | 3.02136900  | 0.79289100  | 1.11457500  |

|   |             |             |             |
|---|-------------|-------------|-------------|
| C | 0.98046100  | 0.43329300  | 2.57436700  |
| H | 2.01271600  | -1.04746500 | 1.43093400  |
| C | 3.92710600  | 0.60623200  | 2.34532100  |
| H | 2.80641500  | 1.85832500  | 0.98758400  |
| H | 3.53805800  | 0.45833000  | 0.20706600  |
| C | 1.88387800  | 0.27464100  | 3.80890700  |
| H | 0.67202600  | 1.48261100  | 2.47826200  |
| H | 0.06560700  | -0.16037200 | 2.68920700  |
| C | 3.21259800  | 1.02604500  | 3.63882800  |
| H | 4.85035800  | 1.18483100  | 2.21519200  |
| H | 4.22836700  | -0.44913400 | 2.42209300  |
| H | 1.35649700  | 0.62778200  | 4.70420100  |
| H | 2.09078700  | -0.79356900 | 3.97080100  |
| H | 3.86168100  | 0.85176500  | 4.50645600  |
| H | 3.01513200  | 2.10758100  | 3.60602200  |
| O | -7.67914400 | -0.97457500 | -0.21303400 |
| O | 3.60439300  | -5.77901800 | -1.00207000 |
| O | 2.08577200  | 6.19765600  | -1.31761400 |
| C | -8.54176400 | 0.05381000  | 0.24084500  |
| H | -8.37651900 | 0.28249500  | 1.30254800  |
| H | -8.41962800 | 0.97398500  | -0.34653500 |
| H | -9.55722400 | -0.32501400 | 0.10888900  |
| C | 3.17036500  | 6.36091400  | -2.21631800 |
| H | 4.07597800  | 5.85579700  | -1.85429400 |
| H | 2.92555300  | 5.98431800  | -3.21846000 |
| H | 3.35525300  | 7.43538800  | -2.27101400 |
| C | 4.85192700  | -5.65005500 | -1.66332600 |
| H | 4.72980300  | -5.27412900 | -2.68802500 |
| H | 5.53324500  | -4.98492200 | -1.11581600 |
| H | 5.27890500  | -6.65415600 | -1.69696000 |

Ar=4-CF3-Ph, R=Cy

|                                              |                             |
|----------------------------------------------|-----------------------------|
| Zero-point correction=                       | 0.507728 (Hartree/Particle) |
| Thermal correction to Energy=                | 0.543421                    |
| Thermal correction to Enthalpy=              | 0.544365                    |
| Thermal correction to Gibbs Free Energy=     | 0.432871                    |
| Sum of electronic and zero-point Energies=   | -2187.292029                |
| Sum of electronic and thermal Energies=      | -2187.256336                |
| Sum of electronic and thermal Enthalpies=    | -2187.255392                |
| Sum of electronic and thermal Free Energies= | -2187.366886                |
| Single-point electronic energy (M06) =       | -2187.18016264              |

|   |             |             |             |
|---|-------------|-------------|-------------|
| C | 0.26911200  | -1.27192600 | 0.01687300  |
| C | 0.16313400  | 1.13445900  | 0.05527400  |
| C | -1.10267300 | -1.32477800 | -0.06892300 |
| C | -1.20676500 | 1.06708800  | -0.00327600 |
| C | -1.91611200 | -0.16650400 | -0.01290700 |
| H | -1.55548800 | -2.29239800 | -0.25262400 |
| H | -1.74496800 | 1.98792900  | -0.20262800 |
| N | 0.93533900  | -0.03942800 | 0.25062500  |
| C | 1.09842900  | -2.47185800 | -0.19994400 |
| C | 0.67302400  | -3.74277600 | 0.23650200  |
| C | 2.33225600  | -2.38556800 | -0.87538100 |
| C | 1.43494600  | -4.87811700 | -0.01112600 |
| H | -0.25105800 | -3.83450200 | 0.79908100  |
| C | 3.09657100  | -3.52027800 | -1.12268300 |
| H | 2.67663100  | -1.41759700 | -1.22467000 |
| C | 2.65194000  | -4.77388400 | -0.69291500 |
| H | 1.09662500  | -5.84631800 | 0.34397100  |
| H | 4.04013200  | -3.43443900 | -1.65144900 |
| C | 0.85557600  | 2.41043500  | -0.22689000 |
| C | 1.90444100  | 2.46543400  | -1.16526200 |
| C | 0.42979200  | 3.61204300  | 0.36540400  |
| C | 2.49960600  | 3.67466200  | -1.50024300 |
| H | 2.23251300  | 1.54893000  | -1.64489400 |
| C | 1.02844300  | 4.82561400  | 0.03571700  |
| H | -0.36948500 | 3.59034500  | 1.10057400  |
| C | 2.06531600  | 4.86202000  | -0.89835500 |
| H | 3.29213000  | 3.70415200  | -2.24157400 |
| H | 0.69088500  | 5.74384600  | 0.50429300  |
| C | -3.37876100 | -0.21718200 | -0.01173200 |
| C | -4.14727800 | 0.86353500  | 0.47732300  |

|   |             |             |             |
|---|-------------|-------------|-------------|
| C | -4.08396800 | -1.33652900 | -0.50757800 |
| C | -5.53543100 | 0.83124400  | 0.46646800  |
| H | -3.64692200 | 1.72726000  | 0.90390300  |
| C | -5.47210300 | -1.37184800 | -0.51841300 |
| H | -3.54133800 | -2.18230000 | -0.91737700 |
| C | -6.21026000 | -0.28814200 | -0.03125900 |
| H | -6.10001200 | 1.66921000  | 0.86279000  |
| H | -5.98802000 | -2.24320900 | -0.90860900 |
| C | 1.90099000  | -0.07229200 | 1.41614900  |
| C | 3.22230400  | 0.68559700  | 1.22103600  |
| C | 1.21168100  | 0.34587500  | 2.72844400  |
| H | 2.16245000  | -1.12977400 | 1.50890000  |
| C | 4.15483300  | 0.42520600  | 2.41879000  |
| H | 3.04234400  | 1.76187300  | 1.14071000  |
| H | 3.70198500  | 0.36815300  | 0.28760200  |
| C | 2.14301200  | 0.11523500  | 3.93046700  |
| H | 0.93855400  | 1.40817800  | 2.67460100  |
| H | 0.27969300  | -0.21919500 | 2.85098200  |
| C | 3.49190700  | 0.82522100  | 3.74580900  |
| H | 5.09214100  | 0.97710100  | 2.27877100  |
| H | 4.42233700  | -0.64124200 | 2.45065700  |
| H | 1.65205500  | 0.45720100  | 4.84996400  |
| H | 2.31469300  | -0.96428000 | 4.05235900  |
| H | 4.15838600  | 0.59797500  | 4.58692700  |
| H | 3.33354800  | 1.91348000  | 3.75568900  |
| C | 3.44420900  | -6.01247600 | -1.00354500 |
| C | -7.70967800 | -0.29983800 | -0.09621300 |
| C | 2.75750000  | 6.15493100  | -1.22860900 |
| F | 3.04721800  | 6.24267800  | -2.54690100 |
| F | 2.00856500  | 7.23108700  | -0.90394900 |
| F | 3.93298000  | 6.27716500  | -0.56569100 |
| F | 4.75605600  | -5.74239800 | -1.18538100 |
| F | 3.00752200  | -6.61731400 | -2.13407000 |
| F | 3.35075800  | -6.92912900 | -0.01312900 |
| F | -8.17158500 | 0.24850500  | -1.24691900 |
| F | -8.26445700 | 0.40499800  | 0.91696800  |
| F | -8.20852000 | -1.55581300 | -0.03773100 |

**Ar=4-F-Ph, R=Cy**

|                                              |                |                    |             |
|----------------------------------------------|----------------|--------------------|-------------|
| Zero-point correction=                       | 0.468842       | (Hartree/Particle) |             |
| Thermal correction to Energy=                | 0.496047       |                    |             |
| Thermal correction to Enthalpy=              | 0.496992       |                    |             |
| Thermal correction to Gibbs Free Energy=     | 0.408862       |                    |             |
| Sum of electronic and zero-point Energies=   | -1473.915608   |                    |             |
| Sum of electronic and thermal Energies=      | -1473.888403   |                    |             |
| Sum of electronic and thermal Enthalpies=    | -1473.887458   |                    |             |
| Sum of electronic and thermal Free Energies= | -1473.975588   |                    |             |
| Single-point electronic energy (M06) =       | -1473.79497939 |                    |             |
| C                                            | 0.02327200     | 1.30167000         | -0.22879100 |
| C                                            | -0.06298800    | -1.10920100        | -0.24624700 |
| C                                            | 1.39598400     | 1.24611400         | -0.19131000 |
| C                                            | 1.30798500     | -1.14663000        | -0.18476500 |
| C                                            | 2.10839400     | 0.02468700         | -0.07180300 |
| H                                            | 1.93599100     | 2.17925400         | -0.30887600 |
| H                                            | 1.78947900     | -2.10304800        | -0.36274600 |
| N                                            | -0.75832700    | 0.12074700         | -0.09066900 |
| C                                            | -0.68992100    | 2.57060000         | -0.47592400 |
| C                                            | -0.22640400    | 3.78559900         | 0.06632000  |
| C                                            | -1.84058700    | 2.60885200         | -1.28902000 |
| C                                            | -0.86727400    | 4.99157900         | -0.20472300 |
| H                                            | 0.63550800     | 3.78069000         | 0.72682300  |
| C                                            | -2.49436600    | 3.80662300         | -1.56375500 |
| H                                            | -2.20815000    | 1.68575400         | -1.72545400 |
| C                                            | -1.99524300    | 4.98441900         | -1.01777700 |
| H                                            | -0.51562400    | 5.92781800         | 0.21645600  |
| H                                            | -3.37355600    | 3.84066900         | -2.19913700 |
| C                                            | -0.82636500    | -2.32568300        | -0.60312600 |
| C                                            | -1.79734300    | -2.29808800        | -1.62238500 |
| C                                            | -0.54211100    | -3.56121800        | 0.00661800  |
| C                                            | -2.46023100    | -3.45521600        | -2.02043500 |
| H                                            | -2.01937700    | -1.35643300        | -2.11431000 |

|   |             |             |             |
|---|-------------|-------------|-------------|
| C | -1.19671300 | -4.72897900 | -0.38191500 |
| H | 0.19360200  | -3.60259600 | 0.80466900  |
| C | -2.14892300 | -4.65697700 | -1.39136500 |
| H | -3.20150800 | -3.44180900 | -2.81297200 |
| H | -0.98620700 | -5.68279000 | 0.09080700  |
| C | 3.56869600  | -0.04164500 | 0.02652000  |
| C | 4.20725900  | -1.18297500 | 0.56192700  |
| C | 4.39979700  | 1.01845600  | -0.40010200 |
| C | 5.59237100  | -1.26944000 | 0.66318000  |
| H | 3.60623000  | -2.00720500 | 0.93337500  |
| C | 5.78550900  | 0.94790500  | -0.30039600 |
| H | 3.96049300  | 1.90435700  | -0.84733100 |
| C | 6.36631600  | -0.19888700 | 0.23033900  |
| H | 6.07571300  | -2.14590200 | 1.08287200  |
| H | 6.41881800  | 1.76148600  | -0.63949900 |
| C | -1.82853000 | 0.20740600  | 0.97327800  |
| C | -3.20497800 | -0.35203500 | 0.58159900  |
| C | -1.35459000 | -0.37871200 | 2.31639300  |
| H | -1.96346600 | 1.28250800  | 1.12105900  |
| C | -4.23160100 | -0.04867400 | 1.68777300  |
| H | -3.15114800 | -1.43469000 | 0.43308100  |
| H | -3.52907300 | 0.08764600  | -0.36920200 |
| C | -2.38552400 | -0.10305600 | 3.42460300  |
| H | -1.20940900 | -1.46201800 | 2.21358500  |
| H | -0.38145100 | 0.05194800  | 2.58173300  |
| C | -3.78153300 | -0.61692200 | 3.04184700  |
| H | -5.20824600 | -0.46150000 | 1.40652600  |
| H | -4.36631700 | 1.03958800  | 1.77532800  |
| H | -2.05223200 | -0.56255500 | 4.36361300  |
| H | -2.43666500 | 0.98003800  | 3.60941800  |
| H | -4.50763600 | -0.35959500 | 3.82317100  |
| H | -3.75984500 | -1.71494500 | 2.98249900  |
| F | -2.79209500 | -5.78146700 | -1.77038400 |
| F | 7.71203500  | -0.27304900 | 0.32854600  |
| F | -2.62658200 | 6.14903500  | -1.27706800 |

**Ar=3,5-diF-Ph, R=Cy**

|                                              |                |                    |             |
|----------------------------------------------|----------------|--------------------|-------------|
| Zero-point correction=                       | 0.443792       | (Hartree/Particle) |             |
| Thermal correction to Energy=                | 0.473706       |                    |             |
| Thermal correction to Enthalpy=              | 0.474650       |                    |             |
| Thermal correction to Gibbs Free Energy=     | 0.379861       |                    |             |
| Sum of electronic and zero-point Energies=   | -1771.640088   |                    |             |
| Sum of electronic and thermal Energies=      | -1771.610174   |                    |             |
| Sum of electronic and thermal Enthalpies=    | -1771.609229   |                    |             |
| Sum of electronic and thermal Free Energies= | -1771.704019   |                    |             |
| Single-point electronic energy (M06) =       | -1771.51744378 |                    |             |
| C                                            | -0.02796300    | 1.29604800         | -0.14144100 |
| C                                            | -0.15685800    | -1.10716700        | -0.19969000 |
| C                                            | 1.34439500     | 1.21860300         | -0.15897500 |
| C                                            | 1.21421900     | -1.17212100        | -0.19074000 |
| C                                            | 2.03749500     | -0.01642800        | -0.09025400 |
| H                                            | 1.89484900     | 2.14469400         | -0.27821300 |
| H                                            | 1.66986500     | -2.13459100        | -0.39838800 |
| N                                            | -0.82294600    | 0.12852000         | 0.00160500  |
| C                                            | -0.72343300    | 2.58241300         | -0.34337100 |
| C                                            | -0.20224000    | 3.77382700         | 0.19628300  |
| C                                            | -1.90565200    | 2.64249600         | -1.10650000 |
| C                                            | -0.85203000    | 4.97457500         | -0.05168800 |
| H                                            | 0.68110800     | 3.77103400         | 0.82435400  |
| C                                            | -2.51638300    | 3.86968400         | -1.31949800 |
| H                                            | -2.32810900    | 1.75018700         | -1.55234400 |
| C                                            | -2.01702900    | 5.06221700         | -0.80625000 |
| C                                            | -0.94928700    | -2.30475200        | -0.55914500 |
| C                                            | -1.94293700    | -2.22962600        | -1.55192500 |
| C                                            | -0.65965700    | -3.54981300        | 0.02583300  |
| C                                            | -2.61173400    | -3.38454400        | -1.92990100 |
| H                                            | -2.17879800    | -1.28975600        | -2.03650100 |
| C                                            | -1.35947000    | -4.67546500        | -0.39021400 |
| H                                            | 0.08729100     | -3.64457600        | 0.80591900  |
| C                                            | -2.34694900    | -4.62967900        | -1.36714000 |
| C                                            | 3.49812000     | -0.10806200        | -0.04790100 |

|   |             |             |             |
|---|-------------|-------------|-------------|
| C | 4.12784800  | -1.28906700 | 0.40338900  |
| C | 4.32061500  | 0.96857500  | -0.44643300 |
| C | 5.51135300  | -1.36340800 | 0.43960600  |
| H | 3.55533200  | -2.13698000 | 0.76002900  |
| C | 5.69907200  | 0.84048300  | -0.38778000 |
| H | 3.90907100  | 1.89197400  | -0.83543900 |
| C | 6.33818800  | -0.31478900 | 0.05108500  |
| C | -1.86739200 | 0.21405900  | 1.09417600  |
| C | -3.25965800 | -0.32594900 | 0.73453800  |
| C | -1.36094800 | -0.39348500 | 2.41561600  |
| H | -1.98546200 | 1.28865200  | 1.25736600  |
| C | -4.24980600 | -0.01844900 | 1.87241600  |
| H | -3.22291500 | -1.40818200 | 0.57803200  |
| H | -3.60599400 | 0.12366900  | -0.20333200 |
| C | -2.35633600 | -0.11713800 | 3.55590400  |
| H | -1.23238500 | -1.47724800 | 2.29667400  |
| H | -0.37543500 | 0.02239400  | 2.65798300  |
| C | -3.77017200 | -0.60654800 | 3.20762800  |
| H | -5.23928100 | -0.41455600 | 1.61394200  |
| H | -4.36649100 | 1.07069900  | 1.97302300  |
| H | -2.00195700 | -0.59279600 | 4.47873900  |
| H | -2.38591500 | 0.96419700  | 3.75476400  |
| H | -4.46956600 | -0.34571300 | 4.01156900  |
| H | -3.76733800 | -1.70412400 | 3.13796300  |
| H | -2.51249300 | 6.00937700  | -0.98077400 |
| H | 7.41761300  | -0.39246700 | 0.08878500  |
| H | -2.88447600 | -5.51832500 | -1.67482800 |
| F | -3.63923800 | 3.91324700  | -2.06349900 |
| F | -0.34435700 | 6.10511000  | 0.47695200  |
| F | 6.46081300  | 1.88033700  | -0.78597800 |
| F | 6.08530600  | -2.50026600 | 0.88463500  |
| F | -1.07911600 | -5.86076700 | 0.18536500  |
| F | -3.55342200 | -3.30390100 | -2.89040300 |

**Ar=3,5-diMe-Ph, R=Cy**

Zero-point correction= 0.658547 (Hartree/Particle)  
Thermal correction to Energy= 0.694725  
Thermal correction to Enthalpy= 0.695669  
Thermal correction to Gibbs Free Energy= 0.583914  
Sum of electronic and zero-point Energies= -1411.934138  
Sum of electronic and thermal Energies= -1411.897959  
Sum of electronic and thermal Enthalpies= -1411.897015  
Sum of electronic and thermal Free Energies= -1412.008770  
Single-point electronic energy (M06) = -1411.84106891

|   |             |             |             |
|---|-------------|-------------|-------------|
| C | -0.02737100 | 1.30199800  | -0.14146300 |
| C | -0.16331500 | -1.10654200 | -0.21378300 |
| C | 1.34442000  | 1.21802800  | -0.17276200 |
| C | 1.20796100  | -1.17134800 | -0.21913100 |
| C | 2.03753400  | -0.01896600 | -0.11901800 |
| H | 1.89622100  | 2.14383800  | -0.29000100 |
| H | 1.65943800  | -2.13342700 | -0.43836500 |
| N | -0.82416300 | 0.13241900  | 0.00230200  |
| C | -0.72349700 | 2.59241500  | -0.31944100 |
| C | -0.20619300 | 3.77653300  | 0.23507600  |
| C | -1.90927900 | 2.67367600  | -1.07434800 |
| C | -0.82916500 | 5.01072800  | 0.03130300  |
| H | 0.68590900  | 3.72662400  | 0.85420700  |
| C | -2.55636600 | 3.89223600  | -1.28518700 |
| H | -2.31194200 | 1.76736300  | -1.51764600 |
| C | -2.00420000 | 5.05360800  | -0.72802600 |
| C | -0.96488700 | -2.30203400 | -0.56132200 |
| C | -1.97240400 | -2.23278000 | -1.54134100 |
| C | -0.68130500 | -3.54756800 | 0.01905400  |
| C | -2.67986100 | -3.36808500 | -1.93602400 |
| H | -2.18843500 | -1.27445700 | -2.00537200 |
| C | -1.37392900 | -4.70380600 | -0.35991900 |
| H | 0.08509400  | -3.60951300 | 0.78816700  |
| C | -2.37076000 | -4.59738700 | -1.33386000 |
| C | 3.49930300  | -0.11544800 | -0.09018900 |
| C | 4.13455800  | -1.28681700 | 0.37397600  |
| C | 4.32738000  | 0.94603600  | -0.51343700 |

|   |             |             |             |
|---|-------------|-------------|-------------|
| C | 5.52424600  | -1.40776200 | 0.41312700  |
| H | 3.52904900  | -2.11049400 | 0.74239400  |
| C | 5.71870000  | 0.85404300  | -0.47869200 |
| H | 3.87975200  | 1.85388800  | -0.90767100 |
| C | 6.30842400  | -0.32911700 | -0.01384100 |
| C | -1.84769800 | 0.21299500  | 1.10890200  |
| C | -3.24820900 | -0.31789400 | 0.76540100  |
| C | -1.32743900 | -0.40918000 | 2.41867200  |
| H | -1.96028100 | 1.28643700  | 1.28423500  |
| C | -4.22104800 | -0.01919000 | 1.92009200  |
| H | -3.21746200 | -1.39793300 | 0.59325200  |
| H | -3.60390700 | 0.14589500  | -0.16207600 |
| C | -2.30505200 | -0.14114400 | 3.57574700  |
| H | -1.20388600 | -1.49187500 | 2.28661700  |
| H | -0.33703800 | 0.00092200  | 2.65056900  |
| C | -3.72528800 | -0.62293400 | 3.24254600  |
| H | -5.21692600 | -0.40819200 | 1.67340600  |
| H | -4.33095400 | 1.06948300  | 2.03514400  |
| H | -1.94068500 | -0.62623300 | 4.49024400  |
| H | -2.32977900 | 0.93854300  | 3.78501500  |
| H | -4.41329600 | -0.36961800 | 4.05922100  |
| H | -3.72586100 | -1.71972800 | 3.15997100  |
| H | -2.50248100 | 6.00895100  | -0.88489100 |
| H | 7.39389600  | -0.41040000 | 0.01684200  |
| H | -2.92033000 | -5.48875500 | -1.63227100 |
| C | -1.03404500 | -6.04020300 | 0.26003800  |
| H | -0.18428300 | -6.51144800 | -0.25192800 |
| H | -0.75668800 | -5.93471100 | 1.31468000  |
| H | -1.87705000 | -6.73647300 | 0.19989000  |
| C | -3.76523400 | -3.28204200 | -2.98520100 |
| H | -3.77017200 | -2.30366900 | -3.47590900 |
| H | -3.63563200 | -4.04653400 | -3.76051800 |
| H | -4.75898600 | -3.43692500 | -2.54481000 |
| C | 6.17589400  | -2.68264300 | 0.90016200  |
| H | 6.59697100  | -3.25920200 | 0.06578500  |
| H | 6.99942000  | -2.47350500 | 1.59303100  |
| H | 5.45760900  | -3.32812400 | 1.41599700  |
| C | 6.58206000  | 2.01065700  | -0.93047000 |
| H | 5.98456800  | 2.79506300  | -1.40604500 |
| H | 7.11360400  | 2.46614900  | -0.08463400 |
| H | 7.34372700  | 1.68622600  | -1.64973900 |
| C | -0.23806100 | 6.27688600  | 0.60881900  |
| H | 0.37275600  | 6.06744900  | 1.49323800  |
| H | 0.40827900  | 6.78251800  | -0.12118800 |
| H | -1.01859300 | 6.98952800  | 0.89711700  |
| C | -3.83615900 | 3.96126200  | -2.08767400 |
| H | -4.00396900 | 3.03929300  | -2.65346300 |
| H | -4.70734100 | 4.11169900  | -1.43632600 |
| H | -3.81945500 | 4.79514100  | -2.79900500 |

**Ar=Ph, R=iPr**

Zero-point correction= 0.427019 (Hartree/Particle)  
Thermal correction to Energy= 0.449928  
Thermal correction to Enthalpy= 0.450872  
Thermal correction to Gibbs Free Energy= 0.372792  
Sum of electronic and zero-point Energies= -1059.521583  
Sum of electronic and thermal Energies= -1059.498674  
Sum of electronic and thermal Enthalpies= -1059.497730  
Sum of electronic and thermal Free Energies= -1059.575810  
Single-point electronic energy (M06) = -1059.39458891

|   |             |             |             |
|---|-------------|-------------|-------------|
| C | -2.01460900 | 0.14985800  | 1.40712000  |
| H | -2.19033200 | 1.21943100  | 1.53557000  |
| C | -0.32162600 | 1.27370700  | 0.01512700  |
| C | -0.37462100 | -1.13809800 | 0.00394300  |
| C | 1.04907400  | 1.23642900  | -0.08712800 |
| C | 0.99557600  | -1.15735100 | -0.07236900 |
| C | 1.78685600  | 0.02560000  | -0.04266100 |
| H | 1.56186500  | 2.17662700  | -0.25602600 |
| H | 1.46920200  | -2.10819100 | -0.29428000 |
| N | -1.06747800 | 0.08163400  | 0.22775300  |



|   |             |             |             |   |             |             |             |
|---|-------------|-------------|-------------|---|-------------|-------------|-------------|
| C | -1.07412700 | 2.53195500  | -0.15802100 | H | 4.27359000  | -3.41600400 | -1.42301600 |
| C | -0.56572700 | 3.75768400  | 0.31528000  | C | 1.03598800  | 2.44283700  | -0.12643600 |
| C | -2.31236200 | 2.54713900  | -0.83109900 | C | 2.13284900  | 2.51597900  | -1.00520800 |
| C | -1.25683100 | 4.94882700  | 0.10691800  | C | 0.58058100  | 3.64103400  | 0.44939300  |
| H | 0.36784000  | 3.76818400  | 0.87067300  | C | 2.74052400  | 3.73340900  | -1.29227400 |
| C | -3.00294900 | 3.73921500  | -1.03426400 | H | 2.49056900  | 1.60637900  | -1.47830100 |
| H | -2.71446900 | 1.61405900  | -1.21378400 | C | 1.19565300  | 4.85755700  | 0.15826700  |
| C | -2.47983200 | 4.94792400  | -0.56831400 | H | -0.25876300 | 3.61378200  | 1.13934700  |
| H | -0.84474600 | 5.88049900  | 0.48599100  | C | 2.28848900  | 4.92957500  | -0.71383200 |
| H | -3.95072000 | 3.72556900  | -1.56654500 | H | 3.57696800  | 3.76005300  | -1.98790100 |
| C | -1.15401300 | -2.36619200 | -0.27085300 | H | 0.82217200  | 5.76750200  | 0.62322700  |
| C | -2.21803000 | -2.35367800 | -1.19200700 | C | 3.34501200  | 0.69613200  | 1.37230300  |
| C | -0.79929600 | -3.59287500 | 0.31866200  | H | 3.23302900  | 1.78198900  | 1.34589100  |
| C | -2.89875400 | -3.52535900 | -1.51206900 | H | 3.99372600  | 0.44519000  | 2.22026100  |
| H | -2.49231500 | -1.41620700 | -1.66620000 | H | 3.85168900  | 0.37815300  | 0.45611300  |
| C | -1.48337400 | -4.76520400 | -0.00147700 | C | 1.26384400  | 0.43456700  | 2.80826700  |
| H | 0.01094300  | -3.61828600 | 1.04246600  | H | 1.88584700  | 0.26126600  | 3.69407200  |
| C | -2.53643200 | -4.73762700 | -0.91737200 | H | 1.03299100  | 1.50397100  | 2.76333400  |
| H | -3.71019000 | -3.49521100 | -2.23479500 | H | 0.32604800  | -0.11631300 | 2.93469000  |
| H | -1.19676200 | -5.70081700 | 0.47175400  | C | -3.20519100 | -0.19560400 | -0.07710600 |
| C | -3.38314600 | -0.49798700 | 1.17892100  | C | -3.99678300 | 0.88812000  | 0.36296400  |
| H | -3.33280600 | -1.58808200 | 1.14482200  | C | -3.89631500 | -1.32074500 | -0.57743700 |
| H | -4.04287800 | -0.21708400 | 2.00863900  | C | -5.38537700 | 0.84852700  | 0.29963900  |
| H | -3.84095700 | -0.14336100 | 0.25059400  | H | -3.51575400 | 1.76152000  | 0.79376000  |
| C | -1.33910400 | -0.36890600 | 2.68445500  | C | -5.28512000 | -1.35339200 | -0.63513800 |
| H | -1.97735100 | -0.16315500 | 3.55149900  | H | -3.34057000 | -2.17569000 | -0.95099800 |
| H | -1.17259200 | -1.45023300 | 2.63888300  | C | -6.06366400 | -0.27040000 | -0.20274800 |
| H | -0.37401600 | 0.12274600  | 2.84541200  | H | -5.95701700 | 1.70160200  | 0.66021000  |
| C | 3.25063800  | -0.01980400 | -0.09148200 | H | -5.77771400 | -2.23853600 | -1.03307000 |
| C | 3.95422700  | -1.15804500 | 0.36232000  | C | -7.57047000 | -0.29889900 | -0.29757100 |
| C | 4.01956900  | 1.05858800  | -0.58305600 | H | -7.92114900 | 0.09732200  | -1.26080600 |
| C | 5.34417900  | -1.21589000 | 0.32242300  | H | -7.95928100 | -1.31928100 | -0.20803800 |
| H | 3.40223600  | -1.99542600 | 0.77922900  | H | -8.03355700 | 0.30846800  | 0.48804000  |
| C | 5.40930000  | 0.99952300  | -0.61902500 | C | 2.97508400  | 6.24285600  | -1.00587100 |
| H | 3.52350900  | 1.94308800  | -0.97106100 | H | 3.29515000  | 6.30392700  | -2.05218000 |
| C | 6.08479800  | -0.13764600 | -0.16783800 | H | 2.31576400  | 7.09357600  | -0.80440000 |
| H | 5.85285200  | -2.10522500 | 0.68633900  | H | 3.87312200  | 6.37197300  | -0.38643300 |
| H | 5.96932000  | 1.84442500  | -1.01224500 | C | 3.73467700  | -6.00116000 | -0.69278000 |
| H | 7.16994900  | -0.18190700 | -0.19726600 | H | 4.41605000  | -6.15311400 | 0.15570200  |
| H | -3.07067800 | -5.65061100 | -1.16571300 | H | 3.12458900  | -6.90636000 | -0.78326900 |
| H | -3.02084900 | 5.87701200  | -0.72503500 | H | 4.35390600  | -5.91972000 | -1.59283600 |

**Ar=4-Me-Ph, R=iPr**

Zero-point correction= 0.509460 (Hartree/Particle)  
 Thermal correction to Energy= 0.538079  
 Thermal correction to Enthalpy= 0.539023  
 Thermal correction to Gibbs Free Energy= 0.446616  
 Sum of electronic and zero-point Energies= -1177.393364  
 Sum of electronic and thermal Energies= -1177.364745  
 Sum of electronic and thermal Enthalpies= -1177.363801  
 Sum of electronic and thermal Free Energies= -1177.456208  
 Single-point electronic energy (M06) = -1177.27900367

|   |             |             |             |
|---|-------------|-------------|-------------|
| C | 2.00958400  | -0.03233700 | 1.55021100  |
| H | 2.24392700  | -1.09084200 | 1.67760300  |
| C | 0.44295700  | -1.24715000 | 0.09009500  |
| C | 0.33240100  | 1.16357900  | 0.11101800  |
| C | -0.92440700 | -1.30070600 | -0.04356800 |
| C | -1.03377100 | 1.09109600  | 0.00091400  |
| C | -1.74376500 | -0.14303000 | 0.00046300  |
| H | -1.36882400 | -2.27018100 | -0.23927700 |
| H | -1.56531100 | 2.01031700  | -0.22323400 |
| N | 1.10019000  | -0.01018200 | 0.34038500  |
| C | 1.28479100  | -2.44659000 | -0.08153800 |
| C | 0.85133500  | -3.71620000 | 0.34583000  |
| C | 2.54184600  | -2.36959200 | -0.71280700 |
| C | 1.62878900  | -4.85076100 | 0.13355400  |
| H | -0.09788800 | -3.80940400 | 0.86607600  |
| C | 3.31425400  | -3.50858700 | -0.91773200 |
| H | 2.89482400  | -1.40600800 | -1.06759600 |
| C | 2.87736400  | -4.77309700 | -0.49869100 |
| H | 1.26358800  | -5.81635900 | 0.47725300  |

**Ar=4-MeO-Ph, R=iPr**

Zero-point correction= 0.525211 (Hartree/Particle)  
 Thermal correction to Energy= 0.555999  
 Thermal correction to Enthalpy= 0.556943  
 Thermal correction to Gibbs Free Energy= 0.460750  
 Sum of electronic and zero-point Energies= -1402.990634  
 Sum of electronic and thermal Energies= -1402.959846  
 Sum of electronic and thermal Enthalpies= -1402.958902  
 Sum of electronic and thermal Free Energies= -1403.055095  
 Single-point electronic energy (M06) = -1402.87863584

|   |             |             |             |
|---|-------------|-------------|-------------|
| C | 1.85909300  | 0.16421600  | 1.77486700  |
| H | 2.25456300  | -0.84717900 | 1.88680200  |
| C | 0.58673100  | -1.21995000 | 0.19099400  |
| C | 0.13949500  | 1.15218600  | 0.23449100  |
| C | -0.75232500 | -1.46074900 | -0.00637700 |
| C | -1.19643800 | 0.89187800  | 0.05806500  |
| C | -1.72751700 | -0.42910800 | 0.01601500  |
| H | -1.04679200 | -2.47780100 | -0.24093800 |
| H | -1.84058000 | 1.73013100  | -0.18845500 |
| N | 1.05266300  | 0.09209000  | 0.49554800  |
| C | 1.59822800  | -2.28240800 | 0.03955100  |
| C | 1.32643400  | -3.61933400 | 0.40308900  |
| C | 2.86535600  | -2.01060300 | -0.50407900 |
| C | 2.25965300  | -4.62616900 | 0.21149000  |
| H | 0.37327500  | -3.86412500 | 0.86293900  |
| C | 3.81552400  | -3.01346400 | -0.69877700 |
| H | 3.10138200  | -0.99370700 | -0.80237400 |
| C | 3.51538200  | -4.33386100 | -0.34304800 |
| H | 2.04599700  | -5.65119200 | 0.49861800  |

|   |             |             |             |
|---|-------------|-------------|-------------|
| H | 4.77519700  | -2.75626300 | -1.13215000 |
| C | 0.67204300  | 2.51771400  | 0.04389500  |
| C | 1.80633700  | 2.75348100  | -0.74836500 |
| C | 0.01361400  | 3.64076400  | 0.58446200  |
| C | 2.27268100  | 4.04365600  | -0.99908700 |
| H | 2.32419200  | 1.90736500  | -1.18966300 |
| C | 0.46600700  | 4.93055500  | 0.34408200  |
| H | -0.85880500 | 3.49169500  | 1.21496500  |
| C | 1.60148000  | 5.14436900  | -0.45082400 |
| H | 3.14702600  | 4.17885100  | -1.62608200 |
| H | -0.03885500 | 5.79219800  | 0.76999900  |
| C | 3.06503700  | 1.10711800  | 1.72940800  |
| H | 2.77630100  | 2.16030600  | 1.72815500  |
| H | 3.68055600  | 0.92805200  | 2.61930600  |
| H | 3.68460700  | 0.91732900  | 0.84760300  |
| C | 0.95539600  | 0.45000900  | 2.98266200  |
| H | 1.52859400  | 0.34292100  | 3.91099600  |
| H | 0.55509300  | 1.46882200  | 2.94978500  |
| H | 0.11395000  | -0.24974800 | 3.01723800  |
| C | -3.16263800 | -0.68297900 | -0.12494800 |
| C | -4.11613400 | 0.27197400  | 0.28054300  |
| C | -3.67055500 | -1.88914500 | -0.66431400 |
| C | -5.48831000 | 0.05584200  | 0.15659400  |
| H | -3.78210000 | 1.20092000  | 0.73320100  |
| C | -5.03082600 | -2.11872500 | -0.78955500 |
| H | -2.98614100 | -2.65324200 | -1.01963300 |
| C | -5.95786600 | -1.14757300 | -0.38090500 |
| H | -6.17589700 | 0.82408700  | 0.49267300  |
| H | -5.40502500 | -3.04509600 | -1.21498700 |
| O | -7.27610400 | -1.47159900 | -0.54713500 |
| O | 1.96948900  | 6.44812000  | -0.62472900 |
| O | 4.36440900  | -5.39416600 | -0.48588300 |
| C | -8.25034300 | -0.51791800 | -0.16090900 |
| H | -8.14854000 | 0.41742900  | -0.72784900 |
| H | -9.21893000 | -0.97001100 | -0.38342000 |
| H | -8.19440200 | -0.29323700 | 0.91295500  |
| C | 5.64728100  | -5.15474800 | -1.04020900 |
| H | 6.14954200  | -6.12368500 | -1.06376500 |
| H | 5.57873300  | -4.75757500 | -2.06187900 |
| H | 6.23158700  | -4.45896800 | -0.42303400 |
| C | 3.10936100  | 6.72197000  | -1.42249300 |
| H | 3.21945700  | 7.80803400  | -1.42530300 |
| H | 4.01636500  | 6.26713700  | -1.00204700 |
| H | 2.97558300  | 6.36910500  | -2.45382900 |

Ar=4-CF3-Ph, R=iPr

|                                              |                             |             |             |
|----------------------------------------------|-----------------------------|-------------|-------------|
| Zero-point correction=                       | 0.441261 (Hartree/Particle) |             |             |
| Thermal correction to Energy=                | 0.475226                    |             |             |
| Thermal correction to Enthalpy=              | 0.476171                    |             |             |
| Thermal correction to Gibbs Free Energy=     | 0.368726                    |             |             |
| Sum of electronic and zero-point Energies=   | -2070.621809                |             |             |
| Sum of electronic and thermal Energies=      | -2070.587844                |             |             |
| Sum of electronic and thermal Enthalpies=    | -2070.586900                |             |             |
| Sum of electronic and thermal Free Energies= | -2070.694345                |             |             |
| Single-point electronic energy (M06) =       | -2070.50289602              |             |             |
| C                                            | 2.08077800                  | 0.22704300  | 1.76458900  |
| H                                            | 2.43380500                  | -0.79838700 | 1.88719400  |
| C                                            | 0.68480900                  | -1.16195100 | 0.27847800  |
| C                                            | 0.24852500                  | 1.20645400  | 0.34075500  |
| C                                            | -0.65863400                 | -1.39930700 | 0.10581400  |
| C                                            | -1.09291300                 | 0.95365100  | 0.19253700  |
| C                                            | -1.62709400                 | -0.36413700 | 0.14306200  |
| H                                            | -0.96053100                 | -2.41697300 | -0.11351300 |
| H                                            | -1.73897700                 | 1.79848700  | -0.02183000 |
| N                                            | 1.16302000                  | 0.14480200  | 0.55941800  |
| C                                            | 1.67945500                  | -2.23716600 | 0.10277400  |
| C                                            | 1.41183300                  | -3.55466000 | 0.52302500  |
| C                                            | 2.91417400                  | -1.98303700 | -0.52839000 |
| C                                            | 2.32910400                  | -4.57721300 | 0.30682700  |
| H                                            | 0.48366500                  | -3.77276700 | 1.04254500  |
| C                                            | 3.83218700                  | -3.00332600 | -0.74442300 |

|   |             |             |             |
|---|-------------|-------------|-------------|
| H | 3.13329700  | -0.97832700 | -0.87491700 |
| C | 3.54438900  | -4.30770100 | -0.32875400 |
| H | 2.10473600  | -5.58606400 | 0.63695600  |
| H | 4.76828700  | -2.79323800 | -1.25206600 |
| C | 0.76694200  | 2.57778500  | 0.14566200  |
| C | 1.85881000  | 2.82420900  | -0.70792800 |
| C | 0.13097600  | 3.67972800  | 0.74560700  |
| C | 2.29439800  | 4.12042900  | -0.95517600 |
| H | 2.35425900  | 1.98694600  | -1.18859000 |
| C | 0.56567400  | 4.97929300  | 0.50115000  |
| H | -0.70033900 | 3.51021100  | 1.42373300  |
| C | 1.65060700  | 5.20512100  | -0.34915800 |
| H | 3.13459400  | 4.29450100  | -1.61978800 |
| H | 0.07327800  | 5.81739800  | 0.98308900  |
| C | 3.32301700  | 1.10282800  | 1.57961900  |
| H | 3.08921800  | 2.16923500  | 1.56662400  |
| H | 4.00335700  | 0.92046100  | 2.41966000  |
| H | 3.85663500  | 0.85274600  | 0.65763100  |
| C | 1.29300100  | 0.60208600  | 3.02708200  |
| H | 1.93606400  | 0.49349600  | 3.90755700  |
| H | 0.94607900  | 1.63990900  | 2.299189700 |
| H | 0.42335700  | -0.05044000 | 3.15617400  |
| C | -3.06375800 | -0.61400900 | 0.01715400  |
| C | -4.00668200 | 0.34454800  | 0.45272400  |
| C | -3.57158600 | -1.81096600 | -0.53615100 |
| C | -5.37293900 | 0.12239000  | 0.34168700  |
| H | -3.66263800 | 1.26631700  | 0.91115800  |
| C | -4.93720500 | -2.03663800 | -0.64601300 |
| H | -2.89034100 | -2.56399200 | -0.91856900 |
| C | -5.85035900 | -1.07138900 | -0.20861700 |
| H | -6.07398800 | 0.87618700  | 0.68560900  |
| H | -5.29904700 | -2.95833600 | -1.09018000 |
| C | 2.09282000  | 6.60826500  | -0.65916000 |
| C | 4.56672000  | -5.39404500 | -0.51119000 |
| C | -7.32586700 | -1.33863800 | -0.27143600 |
| F | 1.49345000  | 7.08867700  | -1.77432600 |
| F | 1.79673000  | 7.46404700  | 0.34426800  |
| F | 3.42621000  | 6.67789900  | -0.87368400 |
| F | 5.47026300  | -5.40886400 | 0.49863100  |
| F | 4.00077000  | -6.62053300 | -0.54807700 |
| F | 5.26825500  | -5.23385700 | -1.65625400 |
| F | -8.03879300 | -0.20021500 | -0.43276200 |
| F | -7.78373700 | -1.92442700 | 0.86267300  |
| F | -7.64681500 | -2.16704400 | -1.29148900 |

Ar=4-F-Ph, R=iPr

|                                              |                             |             |             |
|----------------------------------------------|-----------------------------|-------------|-------------|
| Zero-point correction=                       | 0.402139 (Hartree/Particle) |             |             |
| Thermal correction to Energy=                | 0.427638                    |             |             |
| Thermal correction to Enthalpy=              | 0.428582                    |             |             |
| Thermal correction to Gibbs Free Energy=     | 0.344314                    |             |             |
| Sum of electronic and zero-point Energies=   | -1357.245686                |             |             |
| Sum of electronic and thermal Energies=      | -1357.220186                |             |             |
| Sum of electronic and thermal Enthalpies=    | -1357.219242                |             |             |
| Sum of electronic and thermal Free Energies= | -1357.303510                |             |             |
| Single-point electronic energy (M06) =       | -1357.11799303              |             |             |
| C                                            | 2.00993900                  | -0.04636500 | 1.54649700  |
| H                                            | 2.24362600                  | -1.10552100 | 1.66954100  |
| C                                            | 0.43297400                  | -1.24951600 | 0.08602600  |
| C                                            | 0.34344300                  | 1.16103800  | 0.10319400  |
| C                                            | -0.93472800                 | -1.29210900 | -0.04571700 |
| C                                            | -1.02330000                 | 1.10094000  | -0.00497900 |
| C                                            | -1.74344900                 | -0.12707700 | -0.00162900 |
| H                                            | -1.38831100                 | -2.25788400 | -0.23958600 |
| H                                            | -1.54751400                 | 2.02383200  | -0.23214000 |
| N                                            | 1.10238000                  | -0.01845200 | 0.33375500  |
| C                                            | 1.26485300                  | -2.45676300 | -0.08505300 |
| C                                            | 0.82129800                  | -3.71919500 | 0.35667100  |
| C                                            | 2.51905500                  | -2.38701000 | -0.72488400 |
| C                                            | 1.58149500                  | -4.86734400 | 0.15171900  |
| H                                            | -0.12287600                 | -3.79833600 | 0.88712600  |
| C                                            | 3.29203600                  | -3.52601700 | -0.93120700 |

|   |             |             |             |
|---|-------------|-------------|-------------|
| H | 2.87574800  | -1.42608100 | -1.08152300 |
| C | 2.80952200  | -4.75375600 | -0.49078800 |
| H | 1.24419600  | -5.83955800 | 0.49612400  |
| H | 4.25256600  | -3.47662600 | -1.43398400 |
| C | 1.05895200  | 2.43347900  | -0.13895900 |
| C | 2.14924800  | 2.49039800  | -1.02789300 |
| C | 0.61948700  | 3.63406900  | 0.44772100  |
| C | 2.77802100  | 3.69599000  | -1.32369600 |
| H | 2.49204200  | 1.57583200  | -1.50122900 |
| C | 1.23879600  | 4.84961900  | 0.16101400  |
| H | -0.21090600 | 3.61107500  | 1.14765200  |
| C | 2.31156400  | 4.86111900  | -0.72204900 |
| H | 3.61145600  | 3.74777700  | -2.01686900 |
| H | 0.90854000  | 5.77734300  | 0.61682600  |
| C | 3.34545400  | 0.68271500  | 1.37313400  |
| H | 3.23433500  | 1.76889700  | 1.35553700  |
| H | 3.99417700  | 0.42614800  | 2.21908400  |
| H | 3.85303600  | 0.37164000  | 0.45494600  |
| C | 1.26190000  | 0.41500000  | 2.80485700  |
| H | 1.88230100  | 0.23802800  | 3.69083700  |
| H | 1.03144800  | 1.48471000  | 2.76461800  |
| H | 0.32385600  | -0.13620000 | 2.92780500  |
| C | -3.20608500 | -0.16698400 | -0.07836100 |
| C | -3.98447700 | 0.91804400  | 0.38413700  |
| C | -3.90163600 | -1.27814000 | -0.60577200 |
| C | -5.37442800 | 0.90338200  | 0.32168200  |
| H | -3.49276100 | 1.77806400  | 0.82817700  |
| C | -5.29086600 | -1.30851800 | -0.67022500 |
| H | -3.34927300 | -2.12462000 | -1.00132500 |
| C | -6.01195300 | -0.21384700 | -0.20539800 |
| H | -5.96640500 | 1.73671800  | 0.68646600  |
| H | -5.81909800 | -2.16077800 | -1.08566100 |
| F | 2.92042800  | 6.03264500  | -1.00201000 |
| F | -7.36158500 | -0.23803500 | -0.26586700 |
| F | 3.55565300  | -5.86174400 | -0.68422900 |

**Ar=3,5-diF-Ph, R=iPr**

|                                              |                |                    |             |
|----------------------------------------------|----------------|--------------------|-------------|
| Zero-point correction=                       | 0.377262       | (Hartree/Particle) |             |
| Thermal correction to Energy=                | 0.405408       |                    |             |
| Thermal correction to Enthalpy=              | 0.406352       |                    |             |
| Thermal correction to Gibbs Free Energy=     | 0.315813       |                    |             |
| Sum of electronic and zero-point Energies=   | -1654.969943   |                    |             |
| Sum of electronic and thermal Energies=      | -1654.941797   |                    |             |
| Sum of electronic and thermal Enthalpies=    | -1654.940853   |                    |             |
| Sum of electronic and thermal Free Energies= | -1655.031392   |                    |             |
| Single-point electronic energy (M06) =       | -1654.84035734 |                    |             |
| C                                            | -2.00618800    | 0.05531600         | 1.64210300  |
| H                                            | -2.22221600    | 1.11607000         | 1.78075800  |
| C                                            | -0.43462700    | 1.24766000         | 0.16392400  |
| C                                            | -0.39535700    | -1.15916100        | 0.13943700  |
| C                                            | 0.92860300     | 1.26648800         | -0.01397300 |
| C                                            | 0.96794900     | -1.12837400        | -0.01301400 |
| C                                            | 1.71187900     | 0.08465700         | -0.01703400 |
| H                                            | 1.39466300     | 2.22602200         | -0.20582300 |
| H                                            | 1.46378700     | -2.05950200        | -0.26621300 |
| N                                            | -1.12031500    | 0.02924200         | 0.41063200  |
| C                                            | -1.24309000    | 2.47528000         | 0.03160100  |
| C                                            | -0.74603700    | 3.71700700         | 0.47170700  |
| C                                            | -2.51660400    | 2.42789800         | -0.56832400 |
| C                                            | -1.50982500    | 4.86043300         | 0.28575600  |
| H                                            | 0.20982700     | 3.79783000         | 0.97630000  |
| C                                            | -3.23925600    | 3.60156600         | -0.72513800 |
| H                                            | -2.92673200    | 1.49455800         | -0.93485700 |
| C                                            | -2.76677900    | 4.84193500         | -0.30937200 |
| C                                            | -1.14137500    | -2.41315800        | -0.11051400 |
| C                                            | -2.24797900    | -2.41941500        | -0.97860600 |
| C                                            | -0.70459100    | -3.62562300        | 0.45072000  |
| C                                            | -2.88043000    | -3.62096500        | -1.26126900 |
| H                                            | -2.59860400    | -1.50564400        | -1.44327700 |
| C                                            | -1.37467700    | -4.80081600        | 0.13401800  |
| H                                            | 0.13377300     | -3.65859100        | 1.13744300  |

|   |             |             |             |
|---|-------------|-------------|-------------|
| C | -2.47101800 | -4.83583000 | -0.71929300 |
| C | -3.35348100 | -0.65482100 | 1.48863300  |
| H | -3.25618400 | -1.74204100 | 1.46097300  |
| H | -3.97913700 | -0.39742600 | 2.35123400  |
| H | -3.87807500 | -0.33011200 | 0.58520300  |
| C | -1.23506800 | -0.43092300 | 2.87664500  |
| H | -1.83446200 | -0.25897800 | 3.77761500  |
| H | -1.01804700 | -1.50255200 | 2.81761700  |
| H | -0.28862900 | 0.10837600  | 2.98723900  |
| C | 3.17083700  | 0.09745500  | -0.14134100 |
| C | 3.93056900  | -1.03120900 | 0.23788900  |
| C | 3.86351000  | 1.22651900  | -0.63124800 |
| C | 5.31123000  | -1.00579200 | 0.11900800  |
| H | 3.46413900  | -1.91491400 | 0.65687200  |
| C | 5.24549800  | 1.19799400  | -0.72761100 |
| C | 3.34538100  | 2.11518400  | -0.97098700 |
| H | 6.01134900  | 0.09571000  | -0.36131300 |
| H | -3.34952600 | 5.74581300  | -0.43769700 |
| H | 7.09104200  | 0.09617800  | -0.44426100 |
| H | -2.98243700 | -5.76227800 | -0.95041100 |
| F | 5.88083400  | 2.28606400  | -1.20950700 |
| F | 6.01190200  | -2.09413000 | 0.49874000  |
| F | -3.93170100 | -3.61834300 | -2.10412300 |
| F | -0.95293300 | -5.95482700 | 0.68622100  |
| F | -4.44994300 | 3.54209300  | -1.31395100 |
| F | -1.02222600 | 6.04006900  | 0.71678800  |

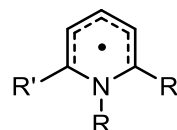

**R'=H, R=iPr**

|                                              |             |                    |             |
|----------------------------------------------|-------------|--------------------|-------------|
| Zero-point correction=                       | 0.182923    | (Hartree/Particle) |             |
| Thermal correction to Energy=                | 0.192108    |                    |             |
| Thermal correction to Enthalpy=              | 0.193052    |                    |             |
| Thermal correction to Gibbs Free Energy=     | 0.148087    |                    |             |
| Sum of electronic and zero-point Energies=   | -366.595521 |                    |             |
| Sum of electronic and thermal Energies=      | -366.586337 |                    |             |
| Sum of electronic and thermal Enthalpies=    | -366.585393 |                    |             |
| Sum of electronic and thermal Free Energies= | -366.630357 |                    |             |
| Single-point electronic energy (M06) =       | -366.58825  |                    |             |
| C                                            | -1.59835200 | -0.38767000        | -0.14831300 |
| H                                            | -1.75745400 | -1.36327100        | -0.62318800 |
| C                                            | 0.72702900  | -1.20190300        | -0.40710500 |
| C                                            | 0.37806300  | 1.12300300         | 0.08432200  |
| C                                            | 2.07081900  | -1.05071400        | -0.21593300 |
| C                                            | 1.72107600  | 1.28656000         | 0.27968800  |
| C                                            | 2.62811300  | 0.20689900         | 0.13321600  |
| H                                            | 2.70668400  | -1.92248000        | -0.34438400 |
| H                                            | 2.07957900  | 2.27654400         | 0.54891000  |
| N                                            | -0.16055600 | -0.11673500        | -0.30648000 |
| C                                            | -1.99750600 | -0.50344600        | 1.33232200  |
| H                                            | -1.84047300 | 0.44859400         | 1.85222000  |
| H                                            | -3.05473900 | -0.77568600        | 1.43085000  |
| H                                            | -1.39455700 | -1.26649500        | 1.83567700  |
| C                                            | -2.46026400 | 0.63317800         | -0.90262800 |
| H                                            | -3.50819200 | 0.31454100         | -0.88706700 |
| H                                            | -2.41674500 | 1.62790600         | -0.44563000 |
| H                                            | -2.13901500 | 0.71937400         | -1.94545000 |
| H                                            | 0.27194500  | -2.14606000        | -0.68429100 |
| H                                            | -0.32885500 | 1.93650600         | 0.18017800  |
| H                                            | 3.69184700  | 0.33222800         | 0.29412100  |

**R'=Me, R=iPr**

|                                            |             |                    |
|--------------------------------------------|-------------|--------------------|
| Zero-point correction=                     | 0.239859    | (Hartree/Particle) |
| Thermal correction to Energy=              | 0.251764    |                    |
| Thermal correction to Enthalpy=            | 0.252708    |                    |
| Thermal correction to Gibbs Free Energy=   | 0.202327    |                    |
| Sum of electronic and zero-point Energies= | -445.164746 |                    |
| Sum of electronic and thermal Energies=    | -445.152840 |                    |
| Sum of electronic and thermal Enthalpies=  | -445.151896 |                    |

Sum of electronic and thermal Free Energies= -445.202277  
 Single-point electronic energy (M06) = -445.17059

|   |             |             |             |
|---|-------------|-------------|-------------|
| C | 1.43998900  | -0.62912300 | 0.23471300  |
| H | 1.34043400  | -1.71271100 | 0.29173300  |
| C | -0.97600800 | -1.07608500 | -0.15596600 |
| C | -0.21253800 | 1.23652700  | -0.19650500 |
| C | -2.24545400 | -0.63873600 | 0.12401300  |
| C | -1.49268700 | 1.64020300  | 0.09474400  |
| C | -2.54098800 | 0.72652500  | 0.32639800  |
| H | -3.04160100 | -1.37861000 | 0.14763900  |
| H | -1.69490500 | 2.70848100  | 0.09356100  |
| N | 0.10654500  | -0.15257300 | -0.23014200 |
| C | 2.58409400  | -0.37914800 | -0.76251300 |
| H | 2.91497700  | 0.66104000  | -0.79071600 |
| H | 3.44852000  | -0.99002200 | -0.47609700 |
| H | 2.28183700  | -0.67087900 | -1.77369900 |
| C | 1.76584100  | -0.15117500 | 1.66005700  |
| H | 2.69130700  | -0.62234400 | 2.01191900  |
| H | 1.90152000  | 0.93301300  | 1.71495300  |
| H | 0.95881400  | -0.42449700 | 2.34788000  |
| H | -3.54314700 | 1.06128700  | 0.56712200  |
| C | 0.82702200  | 2.24126000  | -0.61567700 |
| H | 1.70093000  | 2.28676000  | 0.04565100  |
| H | 1.20159500  | 2.03723300  | -1.62790800 |
| H | 0.37800400  | 3.23862600  | -0.62241100 |
| C | -0.70619400 | -2.52345600 | -0.47718300 |
| H | -0.19383900 | -3.07259700 | 0.32600800  |
| H | -1.65514400 | -3.03774200 | -0.65446700 |
| H | -0.09358300 | -2.62978500 | -1.38266600 |

**R'=Ph, R=iPr**  
 Zero-point correction= 0.345810 (Hartree/Particle)  
 Thermal correction to Energy= 0.363879  
 Thermal correction to Enthalpy= 0.364824  
 Thermal correction to Gibbs Free Energy= 0.298704  
 Sum of electronic and zero-point Energies= -828.541184  
 Sum of electronic and thermal Energies= -828.523115  
 Sum of electronic and thermal Enthalpies= -828.522170  
 Sum of electronic and thermal Free Energies= -828.588290  
 Single-point electronic energy (M06) = -828.449

|   |             |             |             |
|---|-------------|-------------|-------------|
| C | -0.13036100 | -0.32338500 | 1.54212500  |
| H | -1.19677000 | -0.49882700 | 1.69747000  |
| C | -1.28224600 | 0.92515300  | -0.23789300 |
| C | 1.14630100  | 0.92677800  | -0.22509600 |
| C | -1.26984100 | 2.24930000  | -0.63149600 |
| C | 1.13591400  | 2.25255700  | -0.60571700 |
| C | -0.06826400 | 2.96865100  | -0.74280700 |
| H | -2.20467000 | 2.70600700  | -0.94186500 |
| H | 2.07613000  | 2.70892900  | -0.90172000 |
| N | -0.06818800 | 0.28857700  | 0.15798400  |
| C | -2.50536100 | 0.10731700  | -0.27391800 |
| C | -3.77186500 | 0.67115700  | -0.01382200 |
| C | -2.45164100 | -1.26492100 | -0.59584500 |
| C | -4.92992000 | -0.09727500 | -0.09320900 |
| H | -3.84119500 | 1.71589700  | 0.27558600  |
| C | -3.61168900 | -2.03132300 | -0.67040900 |
| H | -1.48778300 | -1.71522500 | -0.81180000 |
| C | -4.85923500 | -1.45383900 | -0.42153400 |
| H | -5.89253800 | 0.36247900  | 0.11599900  |
| H | -3.54210000 | -3.08407800 | -0.93282700 |
| H | -5.76366500 | -2.05328900 | -0.47740300 |
| C | 2.38195000  | 0.12488600  | -0.31822500 |
| C | 2.37567300  | -1.14721200 | -0.92308100 |
| C | 3.61513000  | 0.64127300  | 0.12358900  |
| C | 3.55487000  | -1.86992900 | -1.08084500 |
| H | 1.43534200  | -1.55263100 | -1.28391100 |
| C | 4.79470700  | -0.08444000 | -0.03500100 |
| H | 3.63924300  | 1.61315100  | 0.60933000  |
| C | 4.77185000  | -1.34416400 | -0.63688700 |
| H | 3.52666700  | -2.84503700 | -1.56070800 |

|   |             |             |             |
|---|-------------|-------------|-------------|
| H | 5.73333600  | 0.33248700  | 0.32112900  |
| H | 5.69081000  | -1.91112000 | -0.75803100 |
| C | 0.56662000  | -1.67908700 | 1.68913400  |
| H | 1.65523600  | -1.59945600 | 1.65640100  |
| H | 0.29008400  | -2.10757600 | 2.66002300  |
| H | 0.24761600  | -2.37842500 | 0.91050500  |
| C | 0.33941000  | 0.67860100  | 2.60655800  |
| H | 0.14243600  | 0.27751400  | 3.60754100  |
| H | 1.41439000  | 0.87144700  | 2.52666700  |
| H | -0.19052100 | 1.63167800  | 2.50866500  |
| H | -0.06674800 | 4.00545100  | -1.06067900 |

**R'=CF3, R=iPr**  
 Zero-point correction= 0.193948 (Hartree/Particle)  
 Thermal correction to Energy= 0.209657  
 Thermal correction to Enthalpy= 0.210601  
 Thermal correction to Gibbs Free Energy= 0.150548  
 Sum of electronic and zero-point Energies= -1040.649160  
 Sum of electronic and thermal Energies= -1040.633451  
 Sum of electronic and thermal Enthalpies= -1040.632507  
 Sum of electronic and thermal Free Energies= -1040.692559  
 Single-point electronic energy (M06) = -1040.6421

|   |             |             |             |
|---|-------------|-------------|-------------|
| C | -0.08352900 | -1.48494100 | 0.65751500  |
| H | -1.14264400 | -1.70937500 | 0.76162400  |
| C | -1.27354200 | 0.63933000  | 0.10409000  |
| C | 1.11406300  | 0.71688000  | 0.13144700  |
| C | -1.33330800 | 1.96730100  | 0.44858900  |
| C | 1.06074900  | 2.04568600  | 0.48939200  |
| C | -0.16173700 | 2.68380500  | 0.75396500  |
| H | -2.29551200 | 2.46621700  | 0.42537200  |
| H | 1.98378500  | 2.61324400  | 0.49629000  |
| N | -0.05835800 | -0.07929400 | 0.10827200  |
| C | 0.49086400  | -2.53482000 | -0.30076200 |
| H | 1.57773900  | -2.49880700 | -0.37330900 |
| H | 0.21325100  | -3.52845900 | 0.06892100  |
| H | 0.06432900  | -2.41098900 | -1.29973500 |
| C | 0.51070000  | -1.53896200 | 2.07239000  |
| H | 0.37256800  | -2.54565700 | 2.48247900  |
| H | 1.57870300  | -1.31496400 | 2.07662700  |
| H | 0.00019200  | -0.83059700 | 2.73352700  |
| H | -0.19946200 | 3.72331100  | 1.05589200  |
| C | 2.39501400  | 0.16040600  | -0.42831500 |
| C | -2.51920400 | -0.06832600 | -0.35761700 |
| F | -3.45275000 | 0.80854600  | -0.78067800 |
| F | -2.26507800 | -0.92268700 | -1.37347100 |
| F | -3.11758700 | -0.80458600 | 0.62360200  |
| F | 2.19953200  | -0.41835900 | -1.63513800 |
| F | 3.31935700  | 1.13089500  | -0.58960000 |
| F | 2.98931900  | -0.78570000 | 0.35420000  |

**R'=Cl, R=iPr**  
 Zero-point correction= 0.164026 (Hartree/Particle)  
 Thermal correction to Energy= 0.175535  
 Thermal correction to Enthalpy= 0.176479  
 Thermal correction to Gibbs Free Energy= 0.125601  
 Sum of electronic and zero-point Energies= -1285.795120  
 Sum of electronic and thermal Energies= -1285.783611  
 Sum of electronic and thermal Enthalpies= -1285.782667  
 Sum of electronic and thermal Free Energies= -1285.833544  
 Single-point electronic energy (M06) = -1285.7695

|   |             |             |             |
|---|-------------|-------------|-------------|
| C | -0.23977500 | -1.49395300 | 0.58253100  |
| H | 0.73237500  | -1.84746600 | 0.93347500  |
| C | 1.38282700  | 0.31681600  | 0.01318100  |
| C | -0.90990100 | 0.85981700  | -0.09175300 |
| C | 1.70887300  | 1.61328500  | 0.30793500  |
| C | -0.63508000 | 2.17067000  | 0.20586600  |
| C | 0.68121800  | 2.55651300  | 0.52562800  |
| H | 2.75387700  | 1.90395100  | 0.31663000  |
| H | -1.43408500 | 2.90117700  | 0.13285400  |
| N | 0.06186000  | -0.14486500 | -0.01513600 |
| C | -1.15769400 | -1.38102800 | 1.80524100  |
| H | -2.16788500 | -1.06253100 | 1.53410000  |
| H | -1.23292800 | -2.36233200 | 2.28672600  |

|    |             |             |             |
|----|-------------|-------------|-------------|
| H  | -0.75305500 | -0.67298400 | 2.53576100  |
| C  | -0.74260800 | -2.49245100 | -0.46588700 |
| H  | -0.79017700 | -3.49275700 | -0.01997800 |
| H  | -1.73927400 | -2.23395100 | -0.83108300 |
| H  | -0.05889400 | -2.53120600 | -1.31922800 |
| H  | 0.90743300  | 3.56729300  | 0.84462900  |
| Cl | -2.46576400 | 0.44995200  | -0.83872600 |
| Cl | 2.63179000  | -0.80602000 | -0.54976700 |

**R'=tBu, R=iPr**

|                                              |                             |
|----------------------------------------------|-----------------------------|
| Zero-point correction=                       | 0.409396 (Hartree/Particle) |
| Thermal correction to Energy=                | 0.429204                    |
| Thermal correction to Enthalpy=              | 0.430148                    |
| Thermal correction to Gibbs Free Energy=     | 0.363498                    |
| Sum of electronic and zero-point Energies=   | -680.846012                 |
| Sum of electronic and thermal Energies=      | -680.826204                 |
| Sum of electronic and thermal Enthalpies=    | -680.825260                 |
| Sum of electronic and thermal Free Energies= | -680.891910                 |
| Single-point electronic energy (M06) =       | -680.90275                  |

|   |             |             |             |
|---|-------------|-------------|-------------|
| C | -0.11855200 | -1.53219300 | 0.85471000  |
| H | -1.19237000 | -1.71135800 | 0.94479800  |
| C | -1.26963000 | 0.51588300  | 0.21550100  |
| C | 1.15672600  | 0.57137500  | 0.20008700  |
| C | -1.28903900 | 1.65689500  | 0.98354700  |
| C | 1.11408200  | 1.70659000  | 0.98236100  |
| C | -0.09689200 | 2.20647800  | 1.49744400  |
| H | -2.22719100 | 2.18416000  | 1.13580800  |
| H | 2.02190000  | 2.28093000  | 1.13839900  |
| N | -0.04429000 | -0.21900700 | 0.08785900  |
| C | 0.46050800  | -2.75923300 | 0.14222500  |
| H | 1.55067500  | -2.74566500 | 0.08468900  |
| H | 0.17839200  | -3.65716000 | 0.70555700  |
| H | 0.06335700  | -2.86065700 | -0.87128800 |
| C | 0.42017800  | -1.39041600 | 2.28600500  |
| H | 0.21215900  | -2.30621900 | 2.85225700  |
| H | 1.50119100  | -1.22331500 | 2.29815200  |
| H | -0.05876000 | -0.55160900 | 2.79923000  |
| H | -0.11320100 | 3.07988000  | 2.14101700  |
| C | 2.41113300  | 0.22869000  | -0.63702900 |
| C | -2.53113800 | 0.05547800  | -0.55256400 |
| C | -3.65983400 | -0.34565900 | 0.42740900  |
| H | -4.56927800 | -0.61510200 | -0.12434500 |
| H | -3.37416200 | -1.20778700 | 1.04129400  |
| H | -3.91120100 | 0.47563200  | 1.10690300  |
| C | -2.26434100 | -1.11493200 | -1.52026300 |
| H | -2.05646100 | -2.05438700 | -1.00147200 |
| H | -3.15325100 | -1.28001200 | -2.14030400 |
| H | -1.42018600 | -0.90071300 | -2.18219800 |
| C | -3.03203200 | 1.24476400  | -1.41565200 |
| H | -3.92603500 | 0.95288400  | -1.98155800 |
| H | -3.29375500 | 2.11393200  | -0.80473300 |
| H | -2.26342400 | 1.55824500  | -2.13080700 |
| C | 2.02499300  | -0.50246900 | -1.94108700 |
| H | 2.92403000  | -0.67483100 | -2.54526100 |
| H | 1.55028400  | -1.46685100 | -1.76417200 |
| H | 1.33162300  | 0.10468300  | -2.53371600 |
| C | 3.44902800  | -0.59962700 | 0.16136000  |
| H | 4.34799700  | -0.76943500 | -0.44466700 |
| H | 3.75225600  | -0.06336700 | 1.06808000  |
| H | 3.06984200  | -1.57773700 | 0.46704300  |
| C | 3.12687200  | 1.53601000  | -1.06914900 |
| H | 3.57046100  | 2.07180000  | -0.22377300 |
| H | 3.94426600  | 1.29414900  | -1.75904300 |
| H | 2.43848800  | 2.21715400  | -1.58032600 |

**R'=H, R=Et**

|                                            |                             |
|--------------------------------------------|-----------------------------|
| Zero-point correction=                     | 0.154654 (Hartree/Particle) |
| Thermal correction to Energy=              | 0.162494                    |
| Thermal correction to Enthalpy=            | 0.163438                    |
| Thermal correction to Gibbs Free Energy=   | 0.121580                    |
| Sum of electronic and zero-point Energies= | -327.310000                 |
| Sum of electronic and thermal Energies=    | -327.302161                 |

|                                              |             |             |             |
|----------------------------------------------|-------------|-------------|-------------|
| Sum of electronic and thermal Enthalpies=    | -327.301216 |             |             |
| Sum of electronic and thermal Free Energies= | -327.343074 |             |             |
| Single-point electronic energy (M06) =       | -327.29526  |             |             |
| C                                            | 1.88823400  | 0.00000000  | -0.54730700 |
| H                                            | 2.20087500  | 0.88027300  | -1.12190600 |
| C                                            | -0.25423500 | 1.20340300  | -0.25978200 |
| C                                            | -0.25423500 | -1.20340300 | -0.25978200 |
| C                                            | -1.56766700 | 1.20953100  | 0.11598200  |
| C                                            | -1.56766700 | -1.20953100 | 0.11598200  |
| C                                            | -2.28101800 | 0.00000000  | 0.32161200  |
| H                                            | -2.05790100 | 2.17026700  | 0.24785600  |
| H                                            | -2.05790000 | -2.17026700 | 0.24785600  |
| N                                            | 0.43255200  | 0.00000000  | -0.49068000 |
| C                                            | 2.56419900  | 0.00000000  | 0.82987100  |
| H                                            | 2.27339100  | -0.88580600 | 1.40493400  |
| H                                            | 3.65544000  | 0.00000100  | 0.72438400  |
| H                                            | 2.27338900  | 0.88580400  | 1.40493500  |
| H                                            | -3.31966200 | 0.00000000  | 0.62875200  |
| H                                            | 2.20087500  | -0.88027200 | -1.12190700 |
| H                                            | 0.31898200  | -2.10587600 | -0.43980600 |
| H                                            | 0.31898200  | 2.10587600  | -0.43980600 |

**R'=Me, R=Et**

|                                              |                             |
|----------------------------------------------|-----------------------------|
| Zero-point correction=                       | 0.211731 (Hartree/Particle) |
| Thermal correction to Energy=                | 0.222204                    |
| Thermal correction to Enthalpy=              | 0.223148                    |
| Thermal correction to Gibbs Free Energy=     | 0.175790                    |
| Sum of electronic and zero-point Energies=   | -405.886414                 |
| Sum of electronic and thermal Energies=      | -405.875941                 |
| Sum of electronic and thermal Enthalpies=    | -405.874997                 |
| Sum of electronic and thermal Free Energies= | -405.922354                 |
| Single-point electronic energy (M06) =       | -405.88515                  |

|   |             |             |             |
|---|-------------|-------------|-------------|
| C | 1.80037600  | 0.00167700  | -0.29863700 |
| H | 2.17960900  | -0.87051000 | -0.83583300 |
| C | -0.36001500 | -1.22275100 | -0.18806800 |
| C | -0.36244700 | 1.22197500  | -0.18807200 |
| C | -1.66512900 | -1.20609500 | 0.23105200  |
| C | -1.66753600 | 1.20284700  | 0.23094900  |
| C | -2.36027700 | -0.00235000 | 0.48426200  |
| H | -2.17070900 | -2.16171100 | 0.34340900  |
| H | -2.17500700 | 2.15745600  | 0.34325600  |
| N | 0.33609700  | 0.00034800  | -0.39059200 |
| C | 2.33224500  | 0.00236000  | 1.14182300  |
| H | 3.42886200  | 0.00313600  | 1.14635100  |
| H | 1.98559800  | 0.88632700  | 1.68770400  |
| H | 1.98685700  | -0.88194600 | 1.68796400  |
| H | -3.38819600 | -0.00337300 | 0.82678500  |
| C | 0.34442400  | 2.50362900  | -0.53013800 |
| H | 1.21666600  | 2.70640000  | 0.10706200  |
| H | 0.69958100  | 2.51288000  | -1.57106100 |
| H | -0.34724500 | 3.34166700  | -0.40967800 |
| C | 0.34950400  | -2.50287600 | -0.53015600 |
| H | 1.22194400  | -2.70406800 | 0.10732500  |
| H | -0.34055500 | -3.34231400 | -0.41013900 |
| H | 0.70505700  | -2.51125400 | -1.57093500 |
| H | 2.17799500  | 0.87437400  | -0.83614800 |

**R'=Ph, R=Et**

|                                              |                             |
|----------------------------------------------|-----------------------------|
| Zero-point correction=                       | 0.317841 (Hartree/Particle) |
| Thermal correction to Energy=                | 0.334567                    |
| Thermal correction to Enthalpy=              | 0.335511                    |
| Thermal correction to Gibbs Free Energy=     | 0.272122                    |
| Sum of electronic and zero-point Energies=   | -789.262221                 |
| Sum of electronic and thermal Energies=      | -789.245494                 |
| Sum of electronic and thermal Enthalpies=    | -789.244550                 |
| Sum of electronic and thermal Free Energies= | -789.307940                 |
| Single-point electronic energy (M06) =       | -789.16035                  |

|   |             |             |             |
|---|-------------|-------------|-------------|
| C | -0.00000800 | -0.52456500 | 1.43432800  |
| H | -0.87910900 | -1.17054400 | 1.45631300  |
| C | -1.22022700 | 0.83582700  | -0.22921100 |
| C | 1.22022900  | 0.83583300  | -0.22920900 |
| C | -1.20499800 | 2.14174500  | -0.67505300 |
| C | 1.20502500  | 2.14171700  | -0.67508500 |

|   |             |             |             |
|---|-------------|-------------|-------------|
| C | -0.0000800  | 2.84717400  | -0.84514100 |
| H | -2.14511000 | 2.59188200  | -0.97908600 |
| H | 2.14509000  | 2.59188900  | -0.97918900 |
| N | 0.00003300  | 0.20401000  | 0.13708700  |
| C | -2.45537500 | 0.03409000  | -0.20507200 |
| C | -3.68964000 | 0.61521700  | 0.14830200  |
| C | -2.44851000 | -1.32912500 | -0.56582900 |
| C | -4.86627300 | -0.12927900 | 0.12463000  |
| H | -3.71688900 | 1.65459800  | 0.46350000  |
| C | -3.62614100 | -2.07198300 | -0.58366600 |
| H | -1.51019800 | -1.79135300 | -0.85902900 |
| C | -4.84316400 | -1.47793600 | -0.23944200 |
| H | -5.80440900 | 0.34274100  | 0.40534600  |
| H | -3.59508900 | -3.11837400 | -0.87693500 |
| H | -5.76083300 | -2.05947700 | -0.25074500 |
| C | 2.45543500  | 0.03409800  | -0.20506400 |
| C | 2.44859700  | -1.32909000 | -0.56589500 |
| C | 3.68965500  | 0.61521400  | 0.14845600  |
| C | 3.62624900  | -2.07192100 | -0.58373000 |
| H | 1.51031200  | -1.79133000 | -0.85915400 |
| C | 4.86630900  | -0.12925900 | 0.12480000  |
| H | 3.71685600  | 1.65456100  | 0.46376500  |
| C | 4.84324100  | -1.47788000 | -0.23939200 |
| H | 3.59523700  | -3.11828900 | -0.87708700 |
| H | 5.80440900  | 0.34275000  | 0.40565700  |
| H | 5.76091900  | -2.05940600 | -0.25072200 |
| C | -0.00033600 | 0.41599400  | 2.64191000  |
| H | -0.00025500 | -0.16526300 | 3.57137600  |
| H | 0.88698700  | 1.05796700  | 2.63990700  |
| H | -0.88796000 | 1.05755200  | 2.63977900  |
| H | 0.00003800  | 3.86694000  | -1.21368800 |
| H | 0.87941500  | -1.17013000 | 1.45655200  |

**R'=CF3, R=Et**

|                                              |                             |             |             |
|----------------------------------------------|-----------------------------|-------------|-------------|
| Zero-point correction=                       | 0.166003 (Hartree/Particle) |             |             |
| Thermal correction to Energy=                | 0.180267                    |             |             |
| Thermal correction to Enthalpy=              | 0.181211                    |             |             |
| Thermal correction to Gibbs Free Energy=     | 0.124015                    |             |             |
| Sum of electronic and zero-point Energies=   | -1001.370311                |             |             |
| Sum of electronic and thermal Energies=      | -1001.356046                |             |             |
| Sum of electronic and thermal Enthalpies=    | -1001.355102                |             |             |
| Sum of electronic and thermal Free Energies= | -1001.412299                |             |             |
| Single-point electronic energy (M06) =       | -1001.3557                  |             |             |
| C                                            | 0.00007100                  | -1.63274200 | -0.10980000 |
| H                                            | 0.87082300                  | -2.03062800 | 0.40818100  |
| C                                            | 1.20181700                  | 0.57080500  | -0.06073300 |
| C                                            | -1.20183400                 | 0.57076200  | -0.06075400 |
| C                                            | 1.20072600                  | 1.88951700  | -0.44317300 |
| C                                            | -1.20077500                 | 1.88947700  | -0.44318800 |
| C                                            | -0.00003400                 | 2.57630100  | -0.69873800 |
| H                                            | 2.15230000                  | 2.40285800  | -0.50986600 |
| H                                            | -2.15236500                 | 2.40278900  | -0.50988500 |
| N                                            | 0.00000600                  | -0.16177500 | 0.07367200  |
| C                                            | 0.00010100                  | -2.05975700 | -1.57999600 |
| H                                            | 0.00016700                  | -3.15395000 | -1.64324900 |
| H                                            | -0.89038300                 | -1.68920200 | -2.09500700 |
| H                                            | 0.89054400                  | -1.68909500 | -2.09500000 |
| H                                            | -0.00004900                 | 3.61239600  | -1.01308900 |
| C                                            | -2.49063900                 | -0.10522300 | 0.30625200  |
| C                                            | 2.49062100                  | -0.10518100 | 0.30626500  |
| H                                            | -0.87063000                 | -2.03072900 | 0.40818400  |
| F                                            | -3.51390000                 | 0.77005300  | 0.33999500  |
| F                                            | -2.42525800                 | -0.70123200 | 1.52290200  |
| F                                            | -2.85146700                 | -1.08307700 | -0.57195600 |
| F                                            | 2.42523300                  | -0.70118500 | 1.52291600  |
| F                                            | 2.85141000                  | -1.08305700 | -0.57193300 |
| F                                            | 3.51389900                  | 0.77007900  | 0.33999100  |

**R'=Cl, R=Et**

|                                 |                             |  |  |
|---------------------------------|-----------------------------|--|--|
| Zero-point correction=          | 0.135947 (Hartree/Particle) |  |  |
| Thermal correction to Energy=   | 0.146085                    |  |  |
| Thermal correction to Enthalpy= | 0.147029                    |  |  |

|                                              |              |             |             |
|----------------------------------------------|--------------|-------------|-------------|
| Thermal correction to Gibbs Free Energy=     | 0.098520     |             |             |
| Sum of electronic and zero-point Energies=   | -1246.512837 |             |             |
| Sum of electronic and thermal Energies=      | -1246.502700 |             |             |
| Sum of electronic and thermal Enthalpies=    | -1246.501755 |             |             |
| Sum of electronic and thermal Free Energies= | -1246.550264 |             |             |
| Single-point electronic energy (M06) =       | -1246.4793   |             |             |
| C                                            | 0.00003500   | -1.77594600 | 0.15321100  |
| H                                            | 0.87946300   | -2.22470600 | -0.31162700 |
| C                                            | 1.18425600   | 0.40297300  | -0.07669900 |
| C                                            | -1.18418200  | 0.40297500  | -0.07669500 |
| C                                            | 1.20766600   | 1.68610000  | 0.39867600  |
| C                                            | -1.20759400  | 1.68612900  | 0.39867200  |
| C                                            | 0.00002500   | 2.33195500  | 0.74073900  |
| H                                            | 2.15951000   | 2.20252800  | 0.46108600  |
| H                                            | -2.15945700  | 2.20252200  | 0.46108300  |
| N                                            | 0.00002000   | -0.33822700 | -0.21023700 |
| C                                            | -0.00024200  | -2.00839100 | 1.66506500  |
| H                                            | -0.88829600  | -1.56746900 | 2.13025100  |
| H                                            | -0.00009400  | -3.08316800 | 1.87906600  |
| H                                            | 0.88748400   | -1.56716800 | 2.13060500  |
| H                                            | 0.00005200   | 3.31737900  | 1.19110800  |
| Cl                                           | -2.64700500  | -0.32471900 | -0.74639000 |
| Cl                                           | 2.64704100   | -0.32482900 | -0.74630300 |
| H                                            | -0.87920300  | -2.22477400 | -0.31195500 |

**R'=tBu, R=Et**

|                                              |                             |             |             |
|----------------------------------------------|-----------------------------|-------------|-------------|
| Zero-point correction=                       | 0.381522 (Hartree/Particle) |             |             |
| Thermal correction to Energy=                | 0.400062                    |             |             |
| Thermal correction to Enthalpy=              | 0.401006                    |             |             |
| Thermal correction to Gibbs Free Energy=     | 0.336250                    |             |             |
| Sum of electronic and zero-point Energies=   | -641.571756                 |             |             |
| Sum of electronic and thermal Energies=      | -641.553216                 |             |             |
| Sum of electronic and thermal Enthalpies=    | -641.552272                 |             |             |
| Sum of electronic and thermal Free Energies= | -641.617028                 |             |             |
| Single-point electronic energy (M06) =       | -641.62025                  |             |             |
| C                                            | 0.00001900                  | -1.52132600 | 0.88458100  |
| H                                            | 0.87153000                  | -2.10808400 | 0.59356700  |
| C                                            | -1.22559400                 | 0.47883900  | 0.10395400  |
| C                                            | 1.22558200                  | 0.47886200  | 0.10395800  |
| C                                            | -1.20521300                 | 1.77246700  | 0.57111000  |
| C                                            | 1.20516500                  | 1.77248700  | 0.57111500  |
| C                                            | -0.00002000                 | 2.41245400  | 0.92474900  |
| H                                            | -2.12891000                 | 2.33996100  | 0.60665900  |
| H                                            | 2.12889100                  | 2.33993700  | 0.60675700  |
| N                                            | -0.00002100                 | -0.26254300 | 0.09822900  |
| C                                            | 0.00040300                  | -1.29961400 | 2.40061400  |
| H                                            | -0.88554200                 | -0.73801700 | 2.71408000  |
| H                                            | 0.00061700                  | -2.26293300 | 2.92507300  |
| H                                            | 0.88640100                  | -0.73786500 | 2.71363700  |
| H                                            | -0.00004500                 | 3.42168900  | 1.32214300  |
| C                                            | 2.49615300                  | -0.16655700 | -0.49248400 |
| C                                            | -2.49622000                 | -0.16659700 | -0.49238400 |
| C                                            | -3.33639300                 | -0.91989300 | 0.57337300  |
| H                                            | -4.27496700                 | -1.27700700 | 0.13091200  |
| H                                            | -2.82033200                 | -1.78952800 | 0.99019200  |
| H                                            | -3.58880500                 | -0.25198300 | 1.40455300  |
| C                                            | -2.13522000                 | -1.11778600 | -1.65709100 |
| H                                            | -1.51653800                 | -1.96274400 | -1.34599200 |
| H                                            | -3.05280100                 | -1.52335100 | -2.09986900 |
| H                                            | -1.58943100                 | -0.58108500 | -2.44056400 |
| C                                            | -3.41682500                 | 0.92960800  | -1.08619800 |
| H                                            | -4.25954500                 | 0.45848800  | -1.60598600 |
| H                                            | -3.84076800                 | 1.57997300  | -0.31426800 |
| H                                            | -2.87968900                 | 1.55722700  | -1.80491700 |
| C                                            | 2.13501800                  | -1.11716700 | -1.65761100 |
| H                                            | 3.05249900                  | -1.52314900 | -2.10020400 |
| H                                            | 1.51563900                  | -1.96179400 | -1.34701100 |
| H                                            | 1.58985900                  | -0.57983900 | -2.44110200 |
| C                                            | 3.33612200                  | -0.92045200 | 0.57300600  |
| H                                            | 4.27477400                  | -1.27730700 | 0.13050100  |
| H                                            | 3.58841600                  | -0.25304300 | 1.40463100  |
| H                                            | 2.81999500                  | -1.79033200 | 0.98921300  |

|   |             |             |             |
|---|-------------|-------------|-------------|
| C | 3.41701900  | 0.92972700  | -1.08576100 |
| H | 3.84092100  | 1.57975400  | -0.31351800 |
| H | 4.25973800  | 0.45867700  | -1.60561500 |
| H | 2.88007300  | 1.55767100  | -1.80433600 |
| H | -0.87180900 | -2.10782900 | 0.59405900  |

### Dissociation Transition States

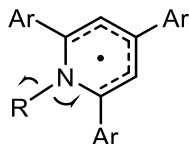

**Ar=Ph, R=Cy**

|                                              |                             |
|----------------------------------------------|-----------------------------|
| Zero-point correction=                       | 0.490520 (Hartree/Particle) |
| Thermal correction to Energy=                | 0.515381                    |
| Thermal correction to Enthalpy=              | 0.516325                    |
| Thermal correction to Gibbs Free Energy=     | 0.432964                    |
| Sum of electronic and zero-point Energies=   | -1176.166291                |
| Sum of electronic and thermal Energies=      | -1176.141431                |
| Sum of electronic and thermal Enthalpies=    | -1176.140487                |
| Sum of electronic and thermal Free Energies= | -1176.223848                |
| Single-point electronic energy (M06) =       | -1176.03771012              |

|   |             |             |             |
|---|-------------|-------------|-------------|
| C | 0.27214500  | 1.31682900  | -0.48976900 |
| C | -0.02329700 | -1.00245700 | -0.67280600 |
| C | 1.62995500  | 1.14583300  | -0.24463600 |
| C | 1.32729500  | -1.21598700 | -0.41760700 |
| C | 2.19753900  | -0.13942200 | -0.16371300 |
| H | 2.26398700  | 2.02049700  | -0.14926700 |
| H | 1.73113800  | -2.21787300 | -0.51870900 |
| N | -0.58870300 | 0.24939500  | -0.61585300 |
| C | -0.32288100 | 2.66680600  | -0.64050400 |
| C | 0.23323400  | 3.79818100  | -0.01562600 |
| C | -1.47234800 | 2.84580700  | -1.43174700 |
| C | -0.32838400 | 5.06149800  | -0.18949700 |
| H | 1.09721700  | 3.68583400  | 0.63305000  |
| C | -2.03263300 | 4.10950000  | -1.60507700 |
| H | -1.90916300 | 1.97933200  | -1.91644200 |
| C | -1.46298600 | 5.22500100  | -0.98719900 |
| H | 0.11587200  | 5.91931500  | 0.30880700  |
| H | -2.91506000 | 4.22478300  | -2.22947500 |
| C | -0.90868800 | -2.12195700 | -1.07877200 |
| C | -1.95831700 | -1.89804600 | -1.98726600 |
| C | -0.70911600 | -3.43099400 | -0.60510300 |
| C | -2.77219400 | -2.94586700 | -2.41226200 |
| H | -2.11686200 | -0.89154700 | -2.35976200 |
| C | -1.52568400 | -4.47848300 | -1.02816900 |
| H | 0.07785900  | -3.62600400 | 0.11821300  |
| C | -2.56054500 | -4.24184100 | -1.93517700 |
| H | -3.57172600 | -2.75163600 | -3.12276100 |
| H | -1.35772800 | -5.48049200 | -0.64181600 |
| C | 3.63469300  | -0.35030500 | 0.10476700  |
| C | 4.07763100  | -1.50152300 | 0.78349700  |
| C | 4.60477200  | 0.58407500  | -0.30510100 |
| C | 5.43105200  | -1.71046300 | 1.04003300  |
| H | 3.34839600  | -2.22498100 | 1.13717100  |
| C | 5.95763200  | 0.37576000  | -0.04672200 |
| H | 4.29844300  | 1.46709400  | -0.85865500 |
| C | 6.37949600  | -0.77264000 | 0.62729900  |
| H | 5.74464800  | -2.60448400 | 1.57296300  |
| H | 6.68671300  | 1.10871400  | -0.38258500 |
| C | -1.88535800 | 0.38830900  | 1.04915100  |
| C | -3.28387300 | -0.00760200 | 0.66723700  |
| C | -1.26124900 | -0.43957500 | 2.13610200  |
| H | -1.73381400 | 1.46131900  | 1.14840300  |
| C | -4.19062300 | 0.03058900  | 1.92558500  |
| H | -3.29201400 | -1.02712900 | 0.26310000  |
| H | -3.68060500 | 0.65518800  | -0.11001000 |
| C | -2.16459000 | -0.41615600 | 3.39629600  |
| H | -1.16099300 | -1.48138000 | 1.80028200  |
| H | -0.25578200 | -0.07813100 | 2.38191400  |

|   |             |             |             |
|---|-------------|-------------|-------------|
| C | -3.60499900 | -0.83018800 | 3.05620100  |
| H | -5.20061500 | -0.31243000 | 1.66487400  |
| H | -4.28930300 | 1.06953000  | 2.27125200  |
| H | -1.74484300 | -1.07799600 | 4.16551200  |
| H | -2.16667500 | 0.59811500  | 3.81990600  |
| H | -4.23784900 | -0.76139800 | 3.95046000  |
| H | -3.61340000 | -1.88565800 | 2.74644700  |
| H | -3.19698100 | -5.05847100 | -2.26529500 |
| H | 7.43500700  | -0.93436700 | 0.82826400  |
| H | -1.90102400 | 6.21040600  | -1.12136200 |

**Ar=4-Me-Ph, R=Cy**

|                                              |                             |
|----------------------------------------------|-----------------------------|
| Zero-point correction=                       | 0.573013 (Hartree/Particle) |
| Thermal correction to Energy=                | 0.603623                    |
| Thermal correction to Enthalpy=              | 0.604567                    |
| Thermal correction to Gibbs Free Energy=     | 0.506387                    |
| Sum of electronic and zero-point Energies=   | -1294.038232                |
| Sum of electronic and thermal Energies=      | -1294.007622                |
| Sum of electronic and thermal Enthalpies=    | -1294.006678                |
| Sum of electronic and thermal Free Energies= | -1294.104858                |
| Single-point electronic energy (M06) =       | -1293.92240646              |

|   |             |             |             |
|---|-------------|-------------|-------------|
| C | 0.12004500  | 1.30090200  | -0.42953800 |
| C | -0.08994400 | -1.03402600 | -0.52397900 |
| C | 1.49773600  | 1.19241000  | -0.27975500 |
| C | 1.28372700  | -1.18413000 | -0.36190100 |
| C | 2.12392100  | -0.06599900 | -0.20474200 |
| H | 2.09894200  | 2.09477900  | -0.25732000 |
| H | 1.72190000  | -2.17144000 | -0.46405100 |
| N | -0.70209000 | 0.19626700  | -0.46232500 |
| C | -0.54001500 | 2.61980300  | -0.57487200 |
| C | 0.00505600  | 3.79356600  | -0.02269900 |
| C | -1.74326000 | 2.73646900  | -1.29161300 |
| C | -0.61866500 | 5.02549600  | -0.19461500 |
| H | 0.91550500  | 3.74005800  | 0.56755200  |
| C | -2.36171200 | 3.97294400  | -1.46051200 |
| H | -2.17773800 | 1.84387400  | -1.72894200 |
| C | -1.81488400 | 5.14211100  | -0.91688200 |
| H | -0.17291500 | 5.91372400  | 0.24865300  |
| H | -3.28543800 | 4.03268600  | -2.03245500 |
| C | -0.95369600 | -2.19944900 | -0.83253300 |
| C | -2.08072300 | -2.05024700 | -1.65971000 |
| C | -0.66318600 | -3.48867900 | -0.35467100 |
| C | -2.87370700 | -3.14311500 | -1.99636500 |
| H | -2.31630300 | -1.06413400 | -2.04592400 |
| C | -1.46260700 | -4.57844600 | -0.69296600 |
| H | 0.18746500  | -3.63935800 | 0.30446400  |
| C | -2.58409500 | -4.42932800 | -1.51843500 |
| H | -3.73173200 | -2.99768100 | -2.64976900 |
| H | -1.21375300 | -5.56291200 | -0.30229500 |
| C | 3.58460800  | -0.20953500 | -0.04523000 |
| C | 4.13560700  | -1.31783600 | 0.62451600  |
| C | 4.48168200  | 0.74914400  | -0.55082700 |
| C | 5.51198800  | -1.45866600 | 0.77727800  |
| H | 3.47397600  | -2.06241000 | 1.05851900  |
| C | 5.85718400  | 0.60318300  | -0.39433000 |
| H | 4.10002200  | 1.60711300  | -1.09714100 |
| C | 6.40282800  | -0.50382500 | 0.26914900  |
| H | 5.90214800  | -2.32263900 | 1.31151700  |
| H | 6.52201700  | 1.36078900  | -0.80412100 |
| C | -1.89425000 | 0.33911000  | 1.27119300  |
| C | -3.31050200 | -0.05843000 | 0.96111900  |
| C | -1.21684400 | -0.48494400 | 2.32951000  |
| H | -1.73937600 | 1.41261900  | 1.36124100  |
| C | -4.15450700 | -0.02089300 | 2.26153200  |
| H | -3.33513800 | -1.07778200 | 0.55731400  |
| H | -3.74553000 | 0.60329300  | 0.20374800  |
| C | -2.05809300 | -0.46035800 | 3.63187600  |
| H | -1.13032600 | -1.52721000 | 1.99194400  |
| H | -0.20132000 | -0.12106400 | 2.52567100  |
| C | -3.51246200 | -0.87846700 | 3.36349800  |
| H | -5.17564800 | -0.36617300 | 2.05176800  |

|   |             |             |             |
|---|-------------|-------------|-------------|
| H | -4.23820200 | 1.01831200  | 2.61057400  |
| H | -1.60013700 | -1.11895300 | 4.38194400  |
| H | -2.04274000 | 0.55517700  | 4.05232200  |
| H | -4.10063700 | -0.80926000 | 4.28779400  |
| H | -3.53349400 | -1.93463100 | 3.05677900  |
| C | -3.46708600 | -5.60583400 | -1.86146000 |
| H | -4.33546800 | -5.66369800 | -1.19096500 |
| H | -3.85483500 | -5.53155000 | -2.88359000 |
| H | -2.92526000 | -6.55344700 | -1.77360500 |
| C | -2.49907500 | 6.47907000  | -1.07815900 |
| H | -3.23199700 | 6.45756800  | -1.89126900 |
| H | -3.03351700 | 6.76854900  | -0.16319500 |
| H | -1.77853000 | 7.27629700  | -1.29437200 |
| C | 7.89688900  | -0.67554900 | 0.40903900  |
| H | 8.15717100  | -1.18143500 | 1.34534700  |
| H | 8.30855900  | -1.28077800 | -0.41027800 |
| H | 8.41521400  | 0.28913800  | 0.39093100  |

Ar=4-MeO-Ph, R=Cy

Zero-point correction= 0.588631 (Hartree/Particle)

Thermal correction to Energy= 0.621396

Thermal correction to Enthalpy= 0.622341

Thermal correction to Gibbs Free Energy= 0.520749

Sum of electronic and zero-point Energies= -1519.636610

Sum of electronic and thermal Energies= -1519.603845

Sum of electronic and thermal Enthalpies= -1519.602901

Sum of electronic and thermal Free Energies= -1519.704492

Single-point electronic energy (M06) = -1519.52298931

|   |             |             |             |
|---|-------------|-------------|-------------|
| C | -0.09409500 | 1.32279300  | -0.34423500 |
| C | 0.00065600  | -1.02196600 | -0.41354900 |
| C | 1.29367800  | 1.39773600  | -0.30787200 |
| C | 1.39042600  | -0.98686500 | -0.36866400 |
| C | 2.08573500  | 0.23424700  | -0.28001500 |
| H | 1.77036800  | 2.37145400  | -0.33954600 |
| H | 1.94596300  | -1.90808300 | -0.51104500 |
| N | -0.76306000 | 0.11760100  | -0.29729500 |
| C | -0.93301900 | 2.53894900  | -0.44275500 |
| C | -0.50005800 | 3.79253700  | 0.03612100  |
| C | -2.20344100 | 2.48041000  | -1.03592100 |
| C | -1.28857000 | 4.92659700  | -0.08734200 |
| H | 0.46025700  | 3.87736600  | 0.53640400  |
| C | -3.00802600 | 3.61249900  | -1.16772500 |
| H | -2.55699900 | 1.52605700  | -1.41122200 |
| C | -2.55120300 | 4.84805700  | -0.69429100 |
| H | -0.95383500 | 5.88766600  | 0.29077000  |
| H | -3.97823100 | 3.52074300  | -1.64327300 |
| C | -0.72288100 | -2.29431000 | -0.64436900 |
| C | -1.92823000 | -2.31022300 | -1.36105200 |
| C | -0.22119400 | -3.53162200 | -0.19319800 |
| C | -2.60999100 | -3.49767200 | -1.62904300 |
| H | -2.33071900 | -1.36914200 | -1.72078700 |
| C | -0.88804100 | -4.72079600 | -0.44938800 |
| H | 0.69578100  | -3.55918800 | 0.38874100  |
| C | -2.09019300 | -4.71506700 | -1.17250900 |
| H | -3.53362500 | -3.46250500 | -2.19591800 |
| H | -0.50321200 | -5.67041900 | -0.09046500 |
| C | 3.55969000  | 0.28637200  | -0.23532500 |
| C | 4.30468800  | -0.73463100 | 0.37587700  |
| C | 4.28325100  | 1.35654900  | -0.80282800 |
| C | 5.69921500  | -0.70623700 | 0.42562700  |
| H | 3.78498500  | -1.56226700 | 0.85040000  |
| C | 5.66817900  | 1.40037400  | -0.76045500 |
| C | 3.75077200  | 2.15370200  | -1.31338600 |
| H | 6.39149600  | 0.36759100  | -0.14476500 |
| H | 6.22821600  | -1.51438000 | 0.91813700  |
| H | 6.21821800  | 2.22141000  | -1.21006600 |
| C | -1.79323100 | 0.12237900  | 1.52626700  |
| C | -3.16121200 | -0.47860200 | 1.35671300  |
| C | -0.91226200 | -0.57192500 | 2.52736800  |
| H | -1.79035800 | 1.20838000  | 1.59844100  |
| C | -3.88024500 | -0.52901900 | 2.72969000  |

|   |             |             |             |
|---|-------------|-------------|-------------|
| H | -3.07928400 | -1.50127500 | 0.96897500  |
| H | -3.75392700 | 0.09658000  | 0.63613600  |
| C | -1.62682200 | -0.63705500 | 3.90200400  |
| H | -0.70563600 | -1.59914600 | 2.19517500  |
| H | 0.05330100  | -0.06157300 | 2.62413200  |
| C | -3.02463000 | -1.26235700 | 3.77469700  |
| H | -4.85708900 | -1.01917200 | 2.62071500  |
| H | -4.07825900 | 0.49596500  | 3.07488100  |
| H | -1.01361500 | -1.20759600 | 4.61243800  |
| H | -1.71786900 | 0.37956600  | 4.31027400  |
| H | -3.53002000 | -1.25713800 | 4.74921600  |
| H | -2.92236500 | -2.31726900 | 3.48005000  |
| O | 7.75045300  | 0.50433100  | -0.15586400 |
| O | -3.24969800 | 6.01917300  | -0.76720900 |
| O | -2.66971400 | -5.93533400 | -1.37195500 |
| C | 8.53115600  | -0.51600900 | 0.44395900  |
| H | 9.57176200  | -0.21197400 | 0.31583300  |
| H | 8.31274300  | -0.61548800 | 1.51573400  |
| H | 8.37431400  | -1.48637200 | -0.04595600 |
| C | -3.89105600 | -5.98784800 | -2.09079800 |
| H | -3.77461400 | -5.60832100 | -3.11471300 |
| H | -4.17206000 | -7.04207200 | -2.12759300 |
| H | -4.68286000 | -5.41922700 | -1.58495900 |
| C | -4.53413600 | 5.99660700  | -1.36786100 |
| C | -4.90559300 | 7.02199800  | -1.31995000 |
| H | -4.48407100 | 5.67824700  | -2.41766500 |
| H | -5.22314200 | 5.33594100  | -0.82480100 |

Ar=4-CF3-Ph, R=Cy

Zero-point correction= 0.504496 (Hartree/Particle)

Thermal correction to Energy= 0.540501

Thermal correction to Enthalpy= 0.541445

Thermal correction to Gibbs Free Energy= 0.427898

Sum of electronic and zero-point Energies= -2187.265827

Sum of electronic and thermal Energies= -2187.229822

Sum of electronic and thermal Enthalpies= -2187.228878

Sum of electronic and thermal Free Energies= -2187.342425

Single-point electronic energy (M06) = -2187.14485341

|   |             |             |             |
|---|-------------|-------------|-------------|
| C | -0.15592300 | 1.27274700  | -0.24568200 |
| C | -0.18689200 | -1.06941100 | -0.24872900 |
| C | 1.23379900  | 1.27799300  | -0.20611400 |
| C | 1.20272600  | -1.11025600 | -0.19257100 |
| C | 1.96019400  | 0.07443000  | -0.14336600 |
| H | 1.76153400  | 2.22373100  | -0.25922000 |
| H | 1.70868300  | -2.06442000 | -0.29485900 |
| N | -0.88711200 | 0.10987900  | -0.18234200 |
| C | -0.92796900 | 2.53105500  | -0.37947500 |
| C | -0.43137700 | 3.76204400  | 0.09136500  |
| C | -2.19121800 | 2.51961600  | -0.99543100 |
| C | -1.16165300 | 4.93392000  | -0.06224500 |
| H | 0.52313000  | 3.79983600  | 0.60721200  |
| C | -2.92505600 | 3.69235300  | -1.15276300 |
| H | -2.58464700 | 1.57804000  | -1.36144300 |
| C | -2.41299400 | 4.90467700  | -0.68812100 |
| H | -0.76762800 | 5.87280000  | 0.31532700  |
| H | -3.89378500 | 3.66714000  | -1.63972200 |
| C | -0.97597100 | -2.30884200 | -0.45164000 |
| C | -2.17494300 | -2.27069800 | -1.18497100 |
| C | -0.54380500 | -3.55082600 | 0.04778500  |
| C | -2.90857400 | -3.42872800 | -1.42057400 |
| H | -2.51849700 | -1.31880300 | -1.57429800 |
| C | -1.27592100 | -4.71098300 | -0.18264300 |
| C | 0.36076000  | -3.60667300 | 0.64594800  |
| H | -2.46210200 | -4.65512200 | -0.91977700 |
| H | -3.82966000 | -3.38248600 | -1.99237600 |
| H | -0.93626300 | -5.65832100 | 0.22333600  |
| C | 3.43544100  | 0.04807700  | -0.10110600 |
| C | 4.11792200  | -0.99195200 | 0.55858100  |
| C | 4.20687700  | 1.05394500  | -0.71379900 |
| C | 5.50736900  | -1.02942900 | 0.60164900  |
| H | 3.55122500  | -1.76412000 | 1.07006400  |



|   |             |             |             |
|---|-------------|-------------|-------------|
| C | 5.59618500  | 1.02144400  | -0.67188900 |
| H | 3.71515100  | 1.85617800  | -1.25522600 |
| C | 6.25445600  | -0.02135600 | -0.01349600 |
| H | 6.01360400  | -1.83215800 | 1.12785000  |
| H | 6.17238500  | 1.80454900  | -1.15385100 |
| C | -1.96471000 | 0.22768100  | 1.66854500  |
| C | -3.36452200 | -0.27799500 | 1.47402800  |
| C | -1.14617400 | -0.51428600 | 2.68429500  |
| H | -1.87316300 | 1.31135400  | 1.70703000  |
| C | -4.10855400 | -0.26396900 | 2.83628600  |
| H | -3.34480200 | -1.30878800 | 1.10012700  |
| H | -3.90335000 | 0.32800100  | 0.73743400  |
| C | -1.88810700 | -0.51427000 | 4.04828000  |
| H | -1.00902700 | -1.55731300 | 2.36633600  |
| H | -0.14928600 | -0.07127200 | 2.79300900  |
| C | -3.32318300 | -1.04318600 | 3.90248400  |
| H | -5.11345600 | -0.68712200 | 2.71072400  |
| H | -4.24227900 | 0.77574000  | 3.16660200  |
| H | -1.32503400 | -1.11754800 | 4.77217700  |
| H | -1.91437200 | 0.51056400  | 4.44409100  |
| H | -3.84225400 | -0.98959900 | 4.86778300  |
| H | -3.29065900 | -2.10632500 | 3.62283400  |
| C | -3.22069800 | -5.91846300 | -1.21813600 |
| C | 7.75589000  | -0.08962200 | -0.01985000 |
| C | -3.17617900 | 6.18993500  | -0.84734900 |
| F | 8.23709300  | -0.71150900 | 1.08020900  |
| F | 8.22327000  | -0.77462600 | -1.09103800 |
| F | 8.31569100  | 1.14015600  | -0.06948900 |
| F | -2.76120700 | -6.52672800 | -2.33738100 |
| F | -3.11273100 | -6.81849500 | -0.21423300 |
| F | -4.53740300 | -5.68332200 | -1.41316800 |
| F | -4.39059400 | 6.00252000  | -1.40604400 |
| F | -2.50676300 | 7.07235900  | -1.62630600 |
| F | -3.37008200 | 6.80239100  | 0.34501400  |

#### Ar=4-F-Ph, R=Cy

|                                              |                |                    |             |
|----------------------------------------------|----------------|--------------------|-------------|
| Zero-point correction=                       | 0.465726       | (Hartree/Particle) |             |
| Thermal correction to Energy=                | 0.493168       |                    |             |
| Thermal correction to Enthalpy=              | 0.494112       |                    |             |
| Thermal correction to Gibbs Free Energy=     | 0.404635       |                    |             |
| Sum of electronic and zero-point Energies=   | -1473.891076   |                    |             |
| Sum of electronic and thermal Energies=      | -1473.863633   |                    |             |
| Sum of electronic and thermal Enthalpies=    | -1473.862689   |                    |             |
| Sum of electronic and thermal Free Energies= | -1473.952167   |                    |             |
| Single-point electronic energy (M06) =       | -1473.76156402 |                    |             |
| C                                            | 0.12537900     | 1.30057300         | -0.43099900 |
| C                                            | -0.09533800    | -1.03217000        | -0.53369100 |
| C                                            | 1.50152700     | 1.18544800         | -0.27414900 |
| C                                            | 1.27638400     | -1.19020100        | -0.36574200 |
| C                                            | 2.12072400     | -0.07639100        | -0.19971400 |
| H                                            | 2.10753000     | 2.08458900         | -0.24650200 |
| H                                            | 1.71080200     | -2.17888400        | -0.47179700 |
| N                                            | -0.70267300    | 0.20045400         | -0.47022000 |
| C                                            | -0.52836400    | 2.62277700         | -0.57718800 |
| C                                            | 0.01825100     | 3.79016200         | -0.01252400 |
| C                                            | -1.72764200    | 2.74032700         | -1.30431900 |
| C                                            | -0.59338500    | 5.03039000         | -0.17843400 |
| H                                            | 0.92112200     | 3.72851200         | 0.58741500  |
| C                                            | -2.35126400    | 3.97288000         | -1.47866600 |
| H                                            | -2.15979100    | 1.84779800         | -1.74288900 |
| C                                            | -1.77127100    | 5.10307200         | -0.91346000 |
| H                                            | -0.17912400    | 5.93145000         | 0.26198700  |
| H                                            | -3.27023100    | 4.06981100         | -2.04785500 |
| C                                            | -0.96404100    | -2.19160500        | -0.85152500 |
| C                                            | -2.08207400    | -2.02834300        | -1.68939700 |
| C                                            | -0.68492300    | -3.48200200        | -0.36601600 |
| C                                            | -2.88931000    | -3.10784700        | -2.03809800 |
| H                                            | -2.30567000    | -1.03878300        | -2.07252700 |
| C                                            | -1.48354800    | -4.57249200        | -0.70408400 |
| H                                            | 0.15598100     | -3.63459600        | 0.30412200  |
| C                                            | -2.57595600    | -4.36755100        | -1.53883200 |

|   |             |              |             |
|---|-------------|--------------|-------------|
| H | -3.74728800 | -2.98904700  | -2.69201000 |
| H | -1.27756300 | -5.56771400  | -0.32383600 |
| C | 3.58011800  | -0.22729000  | -0.03296900 |
| C | 4.11756400  | -1.33639100  | 0.64815100  |
| C | 4.48177700  | 0.72403200   | -0.54825500 |
| C | 5.49160100  | -1.49599400  | 0.81027200  |
| H | 3.44772900  | -2.07308800  | 1.08153200  |
| C | 5.85784400  | 0.58071800   | -0.39252700 |
| H | 4.10406400  | 1.57540400   | -1.10641400 |
| C | 6.34382900  | -0.53109100  | 0.28651700  |
| H | 5.90579600  | -2.34580600  | 1.34304700  |
| H | 6.55379100  | 1.30743400   | -0.79892500 |
| C | -1.89887600 | 0.34187500   | 1.26235700  |
| C | -3.31163000 | -0.07083700  | 0.95712900  |
| C | -1.21260300 | -0.46758900  | 2.32579700  |
| H | -1.75410400 | 1.41740200   | 1.34509900  |
| C | -4.15390900 | -0.102564100 | 2.25881800  |
| H | -3.32897400 | -1.09531600  | 0.56604400  |
| H | -3.75400800 | 0.57823800   | 0.19305300  |
| C | -2.05198400 | -0.43643800  | 3.62963700  |
| H | -1.11972900 | -1.51244200  | 1.99781500  |
| H | -0.19941400 | -0.09458900  | 2.51673500  |
| C | -3.50381400 | -0.86719900  | 3.36821200  |
| H | -5.17229100 | -0.38062100  | 2.05330500  |
| H | -4.24490200 | 1.01651200   | 2.59659700  |
| H | -1.58732600 | -1.08450200  | 4.38446000  |
| H | -2.04239200 | 0.58309700   | 4.04012800  |
| H | -4.09048800 | -0.79163500  | 4.29269900  |
| H | -3.51887900 | -1.92678800  | 3.07337300  |
| F | -2.37056300 | 6.30149100   | -1.07618500 |
| F | 7.67696400  | -0.67658900  | 0.44098400  |
| F | -3.35599200 | -5.41831400  | -1.86934400 |

#### Ar=3,5-diF-Ph, R=Cy

|                                              |                |                    |             |
|----------------------------------------------|----------------|--------------------|-------------|
| Zero-point correction=                       | 0.440580       | (Hartree/Particle) |             |
| Thermal correction to Energy=                | 0.470740       |                    |             |
| Thermal correction to Enthalpy=              | 0.471684       |                    |             |
| Thermal correction to Gibbs Free Energy=     | 0.375527       |                    |             |
| Sum of electronic and zero-point Energies=   | -1771.614472   |                    |             |
| Sum of electronic and thermal Energies=      | -1771.584313   |                    |             |
| Sum of electronic and thermal Enthalpies=    | -1771.583369   |                    |             |
| Sum of electronic and thermal Free Energies= | -1771.679526   |                    |             |
| Single-point electronic energy (M06) =       | -1771.48262919 | C                  |             |
| 0.06000000                                   | 1.30042300     | -0.34090100        |             |
| C                                            | -0.17921300    | -1.02313600        | -0.49357400 |
| C                                            | 1.43989100     | 1.17593000         | -0.23243500 |
| C                                            | 1.19562700     | -1.19632600        | -0.37228200 |
| C                                            | 2.05107100     | -0.09118400        | -0.21098000 |
| H                                            | 2.05205800     | 2.07017700         | -0.19990800 |
| H                                            | 1.61869400     | -2.18562500        | -0.50948100 |
| N                                            | -0.77463100    | 0.20911300         | -0.38729000 |
| C                                            | -0.58865900    | 2.63080900         | -0.43493700 |
| C                                            | 0.00221000     | 3.77730500         | 0.12626300  |
| C                                            | -1.81719900    | 2.75742500         | -1.10612800 |
| C                                            | -0.63189900    | 5.00439600         | -0.00936500 |
| H                                            | 0.92725100     | 3.72762900         | 0.68865400  |
| C                                            | -2.40811800    | 4.00817100         | -1.21365200 |
| H                                            | -2.29345700    | 1.89229000         | -1.54952100 |
| C                                            | -1.84195700    | 5.15914200         | -0.67641900 |
| C                                            | -1.06423800    | -2.17029000        | -0.81539000 |
| C                                            | -2.21054800    | -1.96516800        | -1.60151000 |
| C                                            | -0.75931000    | -3.47224700        | -0.38064300 |
| C                                            | -3.00846300    | -3.04998500        | -1.93595300 |
| H                                            | -2.46663600    | -0.97417500        | -1.95436500 |
| C                                            | -1.59264600    | -4.52244600        | -0.74126400 |
| H                                            | 0.09733500     | -3.67642700        | 0.25134100  |
| C                                            | -2.72979200    | -4.34832900        | -1.52160900 |
| C                                            | 3.51456400     | -0.25442300        | -0.10053700 |
| C                                            | 4.05835800     | -1.39802700        | 0.51309100  |
| C                                            | 4.39278400     | 0.72220200         | -0.60610800 |
| C                                            | 5.43639700     | -1.53625000        | 0.60360300  |

|   |             |             |             |
|---|-------------|-------------|-------------|
| H | 3.42507600  | -2.16264300 | 0.94784500  |
| C | 5.76261600  | 0.53540200  | -0.48876600 |
| H | 4.02856000  | 1.60391600  | -1.12039800 |
| C | 6.32399800  | -0.58578700 | 0.11256500  |
| C | -1.93023400 | 0.31809100  | 1.41407200  |
| C | -3.35142000 | -0.07824300 | 1.13727600  |
| C | -1.21291100 | -0.52411900 | 2.42842900  |
| H | -1.76695300 | 1.38993100  | 1.50732400  |
| C | -4.15304600 | -0.06448700 | 2.46624000  |
| H | -3.38505500 | -1.09239100 | 0.72144500  |
| H | -3.81324000 | 0.59217300  | 0.40439100  |
| C | -2.01295700 | -0.52557500 | 3.75895000  |
| H | -1.13723000 | -1.56030900 | 2.06975100  |
| H | -0.19261600 | -0.16111200 | 2.59885400  |
| C | -3.47444300 | -0.94105000 | 3.53022900  |
| H | -5.17897300 | -0.40723100 | 2.28023300  |
| H | -4.22674100 | 0.96821000  | 2.83520500  |
| H | -1.52753300 | -1.19757100 | 4.47849900  |
| H | -1.98376600 | 0.48153600  | 4.19773700  |
| H | -4.03120300 | -0.88769600 | 4.47436100  |
| H | -3.50579700 | -1.99190800 | 3.20720600  |
| H | -2.32105400 | 6.12627700  | -0.76834100 |
| H | 7.39667000  | -0.71187700 | 0.19361300  |
| H | -3.36780900 | -5.18123400 | -1.79105900 |
| F | -3.58009400 | 4.11804500  | -1.87034100 |
| F | -0.05839600 | 6.09327700  | 0.54075800  |
| F | 6.58870400  | 1.47512600  | -0.98952200 |
| F | 5.93835600  | -2.63338700 | 1.20421800  |
| F | -1.29465300 | -5.76345200 | -0.30755200 |
| F | -4.09924300 | -2.84284100 | -2.69999800 |

**Ar=Ph, R=iPr**

|                                              |                             |             |             |
|----------------------------------------------|-----------------------------|-------------|-------------|
| Zero-point correction=                       | 0.423278 (Hartree/Particle) |             |             |
| Thermal correction to Energy=                | 0.446653                    |             |             |
| Thermal correction to Enthalpy=              | 0.447597                    |             |             |
| Thermal correction to Gibbs Free Energy=     | 0.368156                    |             |             |
| Sum of electronic and zero-point Energies=   | -1059.498069                |             |             |
| Sum of electronic and thermal Energies=      | -1059.474695                |             |             |
| Sum of electronic and thermal Enthalpies=    | -1059.473750                |             |             |
| Sum of electronic and thermal Free Energies= | -1059.553192                |             |             |
| Single-point electronic energy (M06) =       | -1059.36246244              |             |             |
| C                                            | -2.05422100                 | 0.19140600  | 1.74943900  |
| H                                            | -1.98802600                 | 1.27602300  | 1.78816500  |
| C                                            | -0.27864400                 | 1.24122300  | -0.15534800 |
| C                                            | -0.37025900                 | -1.10155300 | -0.20962100 |
| C                                            | 1.11108000                  | 1.20836400  | -0.14580400 |
| C                                            | 1.01824900                  | -1.17637700 | -0.18995500 |
| C                                            | 1.80933000                  | -0.01364800 | -0.12711400 |
| H                                            | 1.66049700                  | 2.14237900  | -0.19036000 |
| H                                            | 1.49582100                  | -2.14063100 | -0.32892500 |
| N                                            | -1.04017700                 | 0.09462700  | -0.09547700 |
| C                                            | -1.01922100                 | 2.52309000  | -0.24592900 |
| C                                            | -0.48764100                 | 3.72525100  | 0.25587700  |
| C                                            | -2.28634100                 | 2.56319300  | -0.85573600 |
| C                                            | -1.18938300                 | 4.92343600  | 0.13763200  |
| H                                            | 0.47134400                  | 3.71880900  | 0.76606800  |
| C                                            | -2.98662100                 | 3.76167600  | -0.97391800 |
| H                                            | -2.70395600                 | 1.64136700  | -1.24633900 |
| C                                            | -2.44175100                 | 4.94897100  | -0.47975900 |
| H                                            | -0.76077300                 | 5.83811600  | 0.53907000  |
| H                                            | -3.95984000                 | 3.76988900  | -1.45825500 |
| C                                            | -1.19551300                 | -2.31834100 | -0.40924900 |
| C                                            | -2.40194900                 | -2.24546400 | -1.12763100 |
| C                                            | -0.78807700                 | -3.57346600 | 0.07722200  |
| C                                            | -3.16761000                 | -3.38625800 | -1.35798200 |
| H                                            | -2.72252000                 | -1.28160600 | -1.50854300 |
| C                                            | -1.55550400                 | -4.71441800 | -0.15163300 |
| H                                            | 0.12633200                  | -3.65233900 | 0.65876200  |
| C                                            | -2.74868100                 | -4.62716400 | -0.87156000 |
| H                                            | -4.09231900                 | -3.30783100 | -1.92412400 |
| H                                            | -1.22450400                 | -5.67236300 | 0.24113500  |

|   |             |             |             |
|---|-------------|-------------|-------------|
| C | 3.28464000  | -0.07843500 | -0.10968000 |
| C | 3.94973800  | -1.15346200 | 0.51042000  |
| C | 4.07283000  | 0.92357000  | -0.70722100 |
| C | 5.34099800  | -1.22432700 | 0.53154700  |
| H | 3.36761400  | -1.92632500 | 1.00453000  |
| C | 5.46379300  | 0.85340100  | -0.68406100 |
| C | 3.59085600  | 1.74966300  | -1.22207000 |
| H | 6.10696200  | -0.22068500 | -0.06461900 |
| H | 5.82830600  | -2.06196000 | 1.02403700  |
| H | 6.04799100  | 1.63602500  | -1.16135700 |
| C | -3.44309200 | -0.33230000 | 1.54273900  |
| H | -3.45074400 | -1.40927400 | 1.35030900  |
| H | -4.05288200 | -0.15627600 | 2.44570800  |
| H | -3.94141900 | 0.17351100  | 0.71001300  |
| C | -1.15690600 | -0.52390600 | 2.71299300  |
| H | -1.53552700 | -0.41686900 | 3.74341800  |
| H | -1.10894800 | -1.59837900 | 2.50108300  |
| H | -0.13909000 | -0.11928200 | 2.69684500  |
| H | 7.19204000  | -0.27468600 | -0.04732000 |
| H | -3.34726800 | -5.51647300 | -1.04958800 |
| H | -2.98896300 | 5.88344500  | -0.57021100 |

**Ar=4-Me-Ph, R=iPr**

|                                              |                             |             |             |
|----------------------------------------------|-----------------------------|-------------|-------------|
| Zero-point correction=                       | 0.505786 (Hartree/Particle) |             |             |
| Thermal correction to Energy=                | 0.534897                    |             |             |
| Thermal correction to Enthalpy=              | 0.535841                    |             |             |
| Thermal correction to Gibbs Free Energy=     | 0.441459                    |             |             |
| Sum of electronic and zero-point Energies=   | -1177.370013                |             |             |
| Sum of electronic and thermal Energies=      | -1177.340901                |             |             |
| Sum of electronic and thermal Enthalpies=    | -1177.339957                |             |             |
| Sum of electronic and thermal Free Energies= | -1177.434339                |             |             |
| Single-point electronic energy (M06) =       | -1177.24747336              |             |             |
| C                                            | -2.04144600                 | 0.15557100  | 1.86349400  |
| H                                            | -2.00105900                 | 1.24190800  | 1.88754100  |
| C                                            | -0.34847300                 | 1.22629700  | -0.09746200 |
| C                                            | -0.37188900                 | -1.11927600 | -0.11437800 |
| C                                            | 1.04145200                  | 1.23358200  | -0.11931400 |
| C                                            | 1.01839700                  | -1.15290800 | -0.12768000 |
| C                                            | 1.77651100                  | 0.03313500  | -0.09961200 |
| H                                            | 1.56181000                  | 2.18245800  | -0.19090300 |
| H                                            | 1.51994200                  | -2.10516000 | -0.26535300 |
| N                                            | -1.07454200                 | 0.05861100  | -0.00089200 |
| C                                            | -1.12844600                 | 2.48328400  | -0.18985800 |
| C                                            | -0.62311000                 | 3.71294300  | 0.26860200  |
| C                                            | -2.41238400                 | 2.48117000  | -0.76303100 |
| C                                            | -1.36358100                 | 4.88551800  | 0.14489800  |
| H                                            | 0.35154100                  | 3.75187900  | 0.74692800  |
| C                                            | -3.14696200                 | 3.65730000  | -0.88431900 |
| H                                            | -2.81747100                 | 1.54355800  | -1.12868100 |
| C                                            | -2.64051300                 | 4.88333400  | -0.43242700 |
| H                                            | -0.94495800                 | 5.82004400  | 0.51275300  |
| H                                            | -4.13210200                 | 3.62472300  | -1.34542600 |
| C                                            | -1.16419800                 | -2.36232200 | -0.27417100 |
| C                                            | -2.39323500                 | -2.34184800 | -0.95672800 |
| C                                            | -0.71168900                 | -3.59895700 | -0.21564000 |
| C                                            | -3.12793800                 | -3.50790300 | -1.14640000 |
| H                                            | -2.75968800                 | -1.39563900 | -1.34085100 |
| H                                            | -1.45295100                 | -4.76331800 | 0.02413800  |
| C                                            | 0.21830300                  | -3.64767400 | 0.77557900  |
| C                                            | -2.67257600                 | -4.74362800 | -0.66353900 |
| H                                            | -4.07280800                 | -3.46077900 | -1.68431300 |
| H                                            | -1.08106600                 | -5.70361200 | 0.42557400  |
| C                                            | 3.25230300                  | 0.01312700  | -0.11737900 |
| C                                            | 3.97038000                  | -1.03926600 | -0.03926600 |
| C                                            | 3.99981600                  | 1.03479900  | -0.73203500 |
| C                                            | 5.36199000                  | -1.06630100 | 0.46350100  |
| H                                            | 3.43025400                  | -1.83504400 | 0.98597100  |
| C                                            | 5.39125200                  | 1.00341300  | -0.74393400 |
| H                                            | 3.48591400                  | 1.84690700  | -1.23836500 |
| C                                            | 6.10302600                  | -0.04444800 | -0.14447000 |
| H                                            | 5.88387200                  | -1.89406700 | 0.93942800  |

|   |             |             |             |
|---|-------------|-------------|-------------|
| H | 5.93664000  | 1.80365900  | -1.23998700 |
| C | -3.42276300 | -0.40333900 | 1.70040900  |
| H | -3.40950300 | -1.48257800 | 1.52115500  |
| H | -4.01308800 | -0.23042600 | 2.61690900  |
| H | -3.95447400 | 0.07962200  | 0.87472100  |
| C | -1.10536600 | -0.52446600 | 2.81606400  |
| H | -1.46341900 | -0.41347300 | 3.85348000  |
| H | -1.03487800 | -1.60006100 | 2.61642400  |
| H | -0.09864300 | -0.09503700 | 2.77152100  |
| C | -3.46298200 | -6.00953100 | -0.89647300 |
| H | -4.53961800 | -5.83791500 | -0.78444400 |
| H | -3.30320700 | -6.39870100 | -1.91117200 |
| H | -3.17202500 | -6.79865700 | -0.19530200 |
| C | -3.45382400 | 6.15197000  | -0.53458600 |
| H | -4.14721800 | 6.11631600  | -1.38174400 |
| H | -4.05551600 | 6.31520400  | 0.37007500  |
| H | -2.81276000 | 7.03153800  | -0.65879400 |
| C | 7.61328600  | -0.05918400 | -0.13191700 |
| H | 8.00494900  | -1.08218600 | -0.14469400 |
| H | 8.02658400  | 0.47194600  | -0.99617300 |
| H | 8.01096600  | 0.42848500  | 0.76872800  |

Ar=4-MeO-Ph, R=iPr

Zero-point correction= 0.521401 (Hartree/Particle)

Thermal correction to Energy= 0.552736

Thermal correction to Enthalpy= 0.553680

Thermal correction to Gibbs Free Energy= 0.455001

Sum of electronic and zero-point Energies= -1402.968304

Sum of electronic and thermal Energies= -1402.936969

Sum of electronic and thermal Enthalpies= -1402.936025

Sum of electronic and thermal Free Energies= -1403.034704

Single-point electronic energy (M06) = -1402.84753984

|   |             |             |             |
|---|-------------|-------------|-------------|
| C | 1.90931900  | 0.03734400  | 2.02953200  |
| H | 2.02602400  | -1.04366900 | 2.03919000  |
| C | 0.46964600  | -1.21117500 | -0.01310800 |
| C | 0.19897500  | 1.12060400  | -0.01056700 |
| C | -0.90631200 | -1.39096600 | -0.09796500 |
| C | -1.18215500 | 0.97999300  | -0.08842700 |
| C | -1.78662800 | -0.29217700 | -0.10238900 |
| H | -1.30038900 | -2.39609000 | -0.20212400 |
| H | -1.79272800 | 1.86302600  | -0.24669800 |
| N | 1.03867500  | 0.03757100  | 0.13070200  |
| C | 1.40394600  | -2.35809600 | -0.08190900 |
| C | 1.03499900  | -3.65445200 | 0.33208300  |
| C | 2.70432100  | -2.18724200 | -0.58067800 |
| C | 1.91433300  | -4.72252000 | 0.23630900  |
| H | 0.05137900  | -3.82487800 | 0.76010300  |
| C | 3.59994900  | -3.25186100 | -0.68389000 |
| H | 3.00916700  | -1.19788800 | -0.90501000 |
| C | 3.20641600  | -4.53199400 | -0.27648400 |
| H | 1.62843800  | -5.71703300 | 0.56479000  |
| H | 4.59103500  | -3.07370800 | -1.08612200 |
| C | 0.83662100  | 2.45279700  | -0.12852000 |
| C | 2.08037500  | 2.59517500  | -0.76018900 |
| C | 0.21274800  | 3.62362900  | 0.34686200  |
| C | 2.68392400  | 3.84212800  | -0.92470600 |
| H | 2.57606700  | 1.70669500  | -1.13702600 |
| C | 0.80100600  | 4.87081300  | 0.19355800  |
| H | -0.73967000 | 3.55186600  | 0.86474600  |
| C | 2.04322300  | 4.99197200  | -0.44677300 |
| H | 3.64165800  | 3.90567700  | -1.42909500 |
| H | 0.32210300  | 5.76928000  | 0.57050400  |
| C | -3.25027700 | -0.45617500 | -0.18669200 |
| C | -4.12092500 | 0.48328300  | 0.38840900  |
| C | -3.83908600 | -1.55669300 | -0.84497800 |
| C | -5.50819000 | 0.34829700  | 0.31815100  |
| H | -3.70902400 | 1.33043400  | 0.92961400  |
| C | -5.21521300 | -1.70614800 | -0.92195800 |
| H | -3.20588400 | -2.29332100 | -1.33108300 |
| C | -6.06543700 | -0.75358900 | -0.33990500 |
| H | -6.13723000 | 1.09671400  | 0.78697700  |

|   |             |             |             |
|---|-------------|-------------|-------------|
| H | -5.66017400 | -2.54993400 | -1.44047400 |
| C | 3.20376200  | 0.79095200  | 1.95581000  |
| H | 3.04564100  | 1.86031700  | 1.78596800  |
| H | 3.75901000  | 0.68817800  | 2.90424600  |
| H | 3.84685000  | 0.40472900  | 1.15860200  |
| C | 0.83835400  | 0.55551600  | 2.94137200  |
| H | 1.15302000  | 0.47246800  | 3.99528600  |
| H | 0.62542700  | 1.61448500  | 2.75392700  |
| H | -0.09300700 | -0.01081300 | 2.83328100  |
| O | -7.40431100 | -0.99114400 | -0.46963900 |
| O | 3.99468700  | -5.64566900 | -0.32950300 |
| O | 2.53814700  | 6.26060700  | -0.54863300 |
| C | 3.79316900  | 6.44151300  | -1.18374300 |
| H | 3.76861000  | 6.10959800  | -2.23028300 |
| H | 3.99377200  | 7.51407100  | -1.15108100 |
| H | 4.59434400  | 5.90685100  | -0.65615800 |
| C | 5.31337500  | -5.51023500 | -0.83342000 |
| H | 5.75672500  | -6.50660100 | -0.78445600 |
| H | 5.31471200  | -5.16429300 | -1.87568600 |
| H | 5.91006300  | -4.81792300 | -0.22450500 |
| C | -8.30714200 | -0.05066100 | 0.08778800  |
| H | -8.18366800 | 0.94363600  | -0.36199100 |
| H | -9.30757900 | -0.42580800 | -0.13602300 |
| H | -8.18617800 | 0.03038800  | 1.17641600  |

Ar=4-CF3-Ph, R=iPr

Zero-point correction= 0.437316 (Hartree/Particle)

Thermal correction to Energy= 0.471807

Thermal correction to Enthalpy= 0.472751

Thermal correction to Gibbs Free Energy= 0.363474

Sum of electronic and zero-point Energies= -2070.597595

Sum of electronic and thermal Energies= -2070.563103

Sum of electronic and thermal Enthalpies= -2070.562159

Sum of electronic and thermal Free Energies= -2070.671437

Single-point electronic energy (M06) = -2070.46969683

|   |             |             |             |
|---|-------------|-------------|-------------|
| C | 2.10337300  | -0.07664300 | 2.04941500  |
| H | 2.12672300  | -1.16355800 | 2.03911700  |
| C | 0.45811700  | -1.19942400 | 0.04071500  |
| C | 0.36348400  | 1.14039300  | 0.06036600  |
| C | -0.92944200 | -1.27768000 | 0.00139100  |
| C | -1.02677300 | 1.10770900  | 0.03468400  |
| C | -1.72268300 | -0.11575900 | 0.02765300  |
| H | -1.40129400 | -2.24972300 | -0.08893700 |
| H | -1.57387000 | 2.03650700  | -0.08784800 |
| N | 1.12351700  | -0.00033900 | 0.15351800  |
| C | 1.29969700  | -2.41549100 | -0.06204400 |
| C | 0.84569200  | -3.67278900 | 0.37781300  |
| C | 2.58719700  | -2.33581700 | -0.62272600 |
| C | 1.64004500  | -4.80696000 | 0.24981900  |
| H | -0.12952200 | -3.76338600 | 0.84625000  |
| C | 3.38471300  | -3.46811500 | -0.75225800 |
| H | 2.94624900  | -1.37361900 | -0.97031500 |
| C | 2.91386000  | -4.71005700 | -0.31808600 |
| H | 1.27331400  | -5.76871400 | 0.59393800  |
| H | 4.36910200  | -3.39199400 | -1.20229000 |
| C | 1.09325000  | 2.42459800  | -0.07388400 |
| C | 2.31528100  | 2.47403700  | -0.76808000 |
| C | 0.57711900  | 3.62384600  | 0.44756200  |
| C | 2.99106800  | 3.67641800  | -0.94214000 |
| H | 2.71946700  | 1.55627900  | -1.18065100 |
| C | 1.25247600  | 4.82927000  | 0.27962700  |
| H | -0.35304000 | 3.61155700  | 1.00789900  |
| C | 2.46206700  | 4.86055500  | -0.41814800 |
| H | 3.92374400  | 3.70162900  | -1.49674300 |
| H | 0.84163600  | 5.74543100  | 0.69056700  |
| C | -3.19665800 | -0.16999500 | -0.02120500 |
| C | -3.97621900 | 0.82695300  | 0.59579800  |
| C | -3.87119400 | -1.21480800 | -0.68193000 |
| C | -5.36570900 | 0.78610500  | 0.55236000  |
| H | -3.48743400 | 1.62744500  | 1.14277500  |
| C | -5.25982400 | -1.26080700 | -0.72608000 |

|   |             |             |             |
|---|-------------|-------------|-------------|
| H | -3.30240800 | -1.98568100 | -1.19264500 |
| C | -6.01539800 | -0.25956500 | -0.10865100 |
| H | -5.94792100 | 1.55668600  | 1.04699000  |
| H | -5.75989200 | -2.07323500 | -1.24332200 |
| C | 3.44278800  | 0.57459700  | 1.89634100  |
| H | 3.35955300  | 1.65529000  | 1.74788100  |
| H | 4.04377600  | 0.41604800  | 2.80796800  |
| H | 4.00423600  | 0.14851500  | 1.05941600  |
| C | 1.11448100  | 0.52289800  | 3.00004900  |
| H | 1.46693700  | 0.40944400  | 4.03875900  |
| H | 0.98179900  | 1.59694200  | 2.82551100  |
| H | 0.13708000  | 0.03289600  | 2.93429400  |
| C | 3.22673700  | 6.14768500  | -0.55704300 |
| C | 3.79125800  | -5.92828900 | -0.39798100 |
| F | 2.41748600  | 7.22780900  | -0.48614500 |
| F | 4.15462700  | 6.28751600  | 0.42039500  |
| F | 3.88993300  | 6.21192600  | -1.73341800 |
| F | 4.71646600  | -5.82290800 | -1.37713700 |
| F | 3.07260900  | -7.04906300 | -0.63509700 |
| F | 4.46561700  | -6.13670100 | 0.75849500  |
| C | -7.51496000 | -0.27813900 | -0.20790700 |
| F | -7.95277800 | 0.35850500  | -1.32054000 |
| F | -8.09839200 | 0.33429700  | 0.84694100  |
| F | -7.99955600 | -1.53924000 | -0.26525200 |

#### Ar=4-F-Ph, R=iPr

|                                              |                             |
|----------------------------------------------|-----------------------------|
| Zero-point correction=                       | 0.398534 (Hartree/Particle) |
| Thermal correction to Energy=                | 0.424468                    |
| Thermal correction to Enthalpy=              | 0.425412                    |
| Thermal correction to Gibbs Free Energy=     | 0.339779                    |
| Sum of electronic and zero-point Energies=   | -1357.222748                |
| Sum of electronic and thermal Energies=      | -1357.196813                |
| Sum of electronic and thermal Enthalpies=    | -1357.195869                |
| Sum of electronic and thermal Free Energies= | -1357.281502                |
| Single-point electronic energy (M06) =       | -1357.08654296              |

|   |             |             |             |
|---|-------------|-------------|-------------|
| C | -2.04427600 | 0.15561100  | 1.85972500  |
| H | -2.01050500 | 1.24222500  | 1.88243500  |
| C | -0.34421600 | 1.22769700  | -0.09610700 |
| C | -0.37586500 | -1.11710500 | -0.12051400 |
| C | 1.04556600  | 1.23079000  | -0.11437600 |
| C | 1.01404200  | -1.15614600 | -0.13056100 |
| C | 1.77568300  | 0.02744600  | -0.09625300 |
| H | 1.56987500  | 2.17787100  | -0.18259300 |
| H | 1.51347800  | -2.10900800 | -0.27252500 |
| N | -1.07517900 | 0.06262900  | -0.00393400 |
| C | -1.12012000 | 2.48750200  | -0.18799800 |
| C | -0.61177600 | 3.71164200  | 0.28474200  |
| C | -2.40111600 | 2.48598500  | -0.77075100 |
| C | -1.34067500 | 4.89275200  | 0.16754900  |
| H | 0.35696900  | 3.74157800  | 0.77426800  |
| C | -3.14223800 | 3.65799600  | -0.89484400 |
| H | -2.80413200 | 1.54890800  | -1.13861800 |
| C | -2.59779800 | 4.84781500  | -0.42452900 |
| H | -0.95532400 | 5.83703900  | 0.53811800  |
| H | -4.12589900 | 3.66308000  | -1.35337200 |
| C | -1.17389000 | -2.35582600 | -0.28730100 |
| C | -2.39794400 | -2.32252400 | -0.97940600 |
| C | -0.72555600 | -3.59540500 | 0.20359200  |
| C | -3.14596000 | -3.47884900 | -1.18326200 |
| H | -2.75289000 | -1.37287600 | -1.36442900 |
| C | -1.46226100 | -4.76181400 | 0.00881400  |
| H | 0.20238700  | -3.64751900 | 0.76545700  |
| C | -2.66435900 | -4.68478200 | -0.68493200 |
| H | -4.08614700 | -3.46030800 | -1.72506700 |
| H | -1.12485000 | -5.71858800 | 0.39376200  |
| C | 3.25171300  | 0.00154100  | -0.11195600 |
| C | 3.96088000  | -1.04580900 | 0.50740900  |
| C | 3.99988600  | 1.01447200  | -0.74272000 |
| C | 5.35289300  | -1.08763200 | 0.50016600  |
| H | 3.41414900  | -1.82703700 | 1.02698700  |
| C | 5.39178600  | 0.98929200  | -0.75612000 |

|   |             |             |             |
|---|-------------|-------------|-------------|
| H | 3.48660600  | 1.82038500  | -1.25831100 |
| C | 6.04978100  | -0.06504400 | -0.13255200 |
| H | 5.89967700  | -1.88972900 | 0.98523200  |
| H | 5.96860600  | 1.76371500  | -1.25126400 |
| C | -3.42235400 | -0.41149100 | 1.69807600  |
| H | -3.40448900 | -1.49266900 | 1.53134200  |
| H | -4.01510200 | -0.23153600 | 2.61125900  |
| H | -3.95545700 | 0.06020200  | 0.86676300  |
| C | -1.10369600 | -0.51659500 | 2.81320100  |
| H | -1.46269300 | -0.40465500 | 3.84990600  |
| H | -1.02744300 | -1.59247600 | 2.61723100  |
| H | -0.09955200 | -0.08132600 | 2.76798600  |
| F | 7.39929300  | -0.09575800 | -0.14194800 |
| F | -3.31054800 | 5.98816100  | -0.53922800 |
| F | -3.38538700 | -5.80960200 | -0.87566500 |

#### Ar=3,5-diF-Ph, R=iPr

|                                              |                             |
|----------------------------------------------|-----------------------------|
| Zero-point correction=                       | 0.373428 (Hartree/Particle) |
| Thermal correction to Energy=                | 0.402057                    |
| Thermal correction to Enthalpy=              | 0.403002                    |
| Thermal correction to Gibbs Free Energy=     | 0.311003                    |
| Sum of electronic and zero-point Energies=   | -1654.946057                |
| Sum of electronic and thermal Energies=      | -1654.917428                |
| Sum of electronic and thermal Enthalpies=    | -1654.916483                |
| Sum of electronic and thermal Free Energies= | -1655.008482                |
| Single-point electronic energy (M06) =       | -1654.80782651              |

|   |             |             |             |
|---|-------------|-------------|-------------|
| C | -2.03047500 | 0.12172100  | 1.97544400  |
| H | -1.99651000 | 1.20811800  | 2.00049000  |
| C | -0.37313200 | 1.22195800  | -0.02729100 |
| C | -0.41075100 | -1.11737000 | -0.09529600 |
| C | 1.01554500  | 1.22512600  | -0.08312900 |
| C | 0.97819500  | -1.16170800 | -0.14132900 |
| C | 1.74155100  | 0.02010900  | -0.10907100 |
| H | 1.53987900  | 2.17207800  | -0.14470100 |
| H | 1.47080100  | -2.11366300 | -0.30778800 |
| N | -1.10365100 | 0.05910500  | 0.05549800  |
| C | -1.14748400 | 2.48607600  | -0.07581500 |
| C | -0.60510100 | 3.69785900  | 0.38870300  |
| C | -2.44902000 | 2.48245700  | -0.60663200 |
| C | -1.35923900 | 4.85953800  | 0.29770500  |
| H | 0.37744800  | 3.74860100  | 0.84319000  |
| C | -3.15958900 | 3.67220200  | -0.67504700 |
| H | -2.89049600 | 1.56521200  | -0.97508300 |
| C | -2.64466300 | 4.88548200  | -0.23154300 |
| C | -1.21530700 | -2.35204000 | -0.26916300 |
| C | -2.45725000 | -2.28779100 | -0.92270400 |
| C | -0.74240100 | -3.59863800 | 0.17718000  |
| C | -3.18327700 | -3.45382300 | -1.11813800 |
| H | -2.84306600 | -1.34186400 | -1.28130500 |
| C | -1.50911900 | -4.73511700 | -0.04260000 |
| H | 0.19591000  | -3.69433300 | 0.71141400  |
| C | -2.73892200 | -4.70042700 | -0.68963400 |
| C | 3.21647000  | -0.00703300 | -0.16877600 |
| C | 3.93065600  | -1.08642500 | 0.38404500  |
| C | 3.93759100  | 1.03822500  | -0.77575400 |
| C | 5.31682000  | -1.09638200 | 0.31699000  |
| H | 3.42506100  | -1.89930700 | 0.89222900  |
| C | 5.32326800  | 0.98007400  | -0.81404400 |
| H | 3.43792200  | 1.87528200  | -1.24920100 |
| C | 6.05100800  | -0.07568900 | -0.27580800 |
| C | -3.40702500 | -0.45226800 | 1.84204300  |
| H | -3.38626500 | -1.53117100 | 1.66204700  |
| H | -3.97335100 | -0.28820500 | 2.77471900  |
| H | -3.96768000 | 0.02656000  | 1.03372000  |
| C | -1.05068600 | -0.56014000 | 2.87901600  |
| H | -1.37329300 | -0.46821200 | 3.92946500  |
| H | -0.97575700 | -1.63219100 | 2.66274700  |
| H | -0.05192900 | -0.11655500 | 2.80673900  |
| H | -3.32284300 | -5.59859400 | -0.84990500 |
| H | 7.13302500  | -0.10127100 | -0.31665100 |
| H | -3.21706700 | 5.80318300  | -0.29064600 |

|   |             |             |             |
|---|-------------|-------------|-------------|
| F | -1.04893900 | -5.92212600 | 0.39995600  |
| F | -4.36846700 | -3.38198700 | -1.75570300 |
| F | -4.40182900 | 3.65703800  | -1.19768000 |
| F | -0.82950300 | 6.01171800  | 0.75441900  |
| F | 5.99644100  | 1.98450700  | -1.40907900 |
| F | 5.98316100  | -2.13395500 | 0.86074600  |

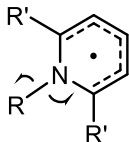

**R'=H, R=Et**

|                                              |             |                    |             |
|----------------------------------------------|-------------|--------------------|-------------|
| Zero-point correction=                       | 0.151394    | (Hartree/Particle) |             |
| Thermal correction to Energy=                | 0.159446    |                    |             |
| Thermal correction to Enthalpy=              | 0.160390    |                    |             |
| Thermal correction to Gibbs Free Energy=     | 0.117531    |                    |             |
| Sum of electronic and zero-point Energies=   | -327.273418 |                    |             |
| Sum of electronic and thermal Energies=      | -327.265366 |                    |             |
| Sum of electronic and thermal Enthalpies=    | -327.264422 |                    |             |
| Sum of electronic and thermal Free Energies= | -327.307281 |                    |             |
| Single-point electronic energy (M06) =       | -327.24944  |                    |             |
| C                                            | 2.26418800  | 0.00000800         | -0.37227400 |
| H                                            | 2.57175800  | -0.91046500        | -0.88153300 |
| C                                            | -0.33894800 | -1.15604000        | -0.57313000 |
| C                                            | -0.33895600 | 1.15605000         | -0.57311600 |
| C                                            | -1.49236700 | -1.19804100        | 0.19510800  |
| C                                            | -1.49237600 | 1.19803400         | 0.19512200  |
| C                                            | -2.09356900 | -0.00000800        | 0.60206400  |
| H                                            | -1.92906600 | -2.15960900        | 0.45175600  |
| H                                            | -1.92908300 | 2.15959600         | 0.45178000  |
| N                                            | 0.27326200  | 0.00001000         | -0.95482900 |
| C                                            | 2.27326000  | -0.00000900        | 1.12296400  |
| H                                            | 3.29670300  | -0.00005400        | 1.53302100  |
| H                                            | 1.76617900  | 0.88665300         | 1.52422600  |
| H                                            | 1.76611100  | -0.88664300        | 1.52420400  |
| H                                            | -2.99592200 | -0.00001500        | 1.20539200  |
| H                                            | 2.57176300  | 0.91048800         | -0.88151500 |
| H                                            | 0.14067600  | -2.07205600        | -0.91198800 |
| H                                            | 0.14066200  | 2.07207400         | -0.91196000 |

**R'=Me, R=Et**

|                                              |             |                    |             |
|----------------------------------------------|-------------|--------------------|-------------|
| Zero-point correction=                       | 0.207315    | (Hartree/Particle) |             |
| Thermal correction to Energy=                | 0.218477    |                    |             |
| Thermal correction to Enthalpy=              | 0.219421    |                    |             |
| Thermal correction to Gibbs Free Energy=     | 0.169921    |                    |             |
| Sum of electronic and zero-point Energies=   | -405.856036 |                    |             |
| Sum of electronic and thermal Energies=      | -405.844874 |                    |             |
| Sum of electronic and thermal Enthalpies=    | -405.843930 |                    |             |
| Sum of electronic and thermal Free Energies= | -405.893430 |                    |             |
| Single-point electronic energy (M06) =       | -405.84598  |                    |             |
| C                                            | -0.20456400 | 2.14411600         | 0.00945300  |
| H                                            | 0.67039000  | 2.59144500         | -0.45295000 |
| C                                            | 1.20928000  | -0.27793000        | -0.36769000 |
| C                                            | -1.12751200 | -0.50374000        | -0.37361000 |
| C                                            | 1.34323300  | -1.44104200        | 0.38146000  |
| C                                            | -1.04027700 | -1.67169600        | 0.37479800  |
| C                                            | 0.20808200  | -2.15284500        | 0.78204500  |
| H                                            | 2.33886500  | -1.80850000        | 0.61666400  |
| H                                            | -1.94837800 | -2.22318900        | 0.60455200  |
| N                                            | -0.01856500 | 0.23329600         | -0.70846600 |
| C                                            | -0.21795000 | 2.04361400         | 1.50345900  |
| H                                            | -0.30469300 | 3.03235900         | 1.98323400  |
| H                                            | -1.06192100 | 1.43838100         | 1.85715300  |
| H                                            | 0.70216800  | 1.58110800         | 1.88200200  |
| H                                            | 0.29480400  | -3.06482900        | 1.36462400  |
| C                                            | -2.45308500 | 0.01612000         | -0.86725000 |
| H                                            | -2.79343900 | 0.88205300         | -0.28395200 |
| H                                            | -2.37659600 | 0.34060000         | -1.91087200 |
| H                                            | -3.22750200 | -0.75368300        | -0.79598700 |
| C                                            | 2.41364100  | 0.48565900         | -0.85519600 |

|   |             |             |             |
|---|-------------|-------------|-------------|
| H | 2.58951200  | 1.39173800  | -0.26026900 |
| H | 3.31785800  | -0.12765600 | -0.79506200 |
| H | 2.27457200  | 0.80384700  | -1.89417100 |
| H | -1.13077600 | 2.42972000  | -0.48051500 |

**R'=Ph, R=Et**

|                                              |             |                    |             |
|----------------------------------------------|-------------|--------------------|-------------|
| Zero-point correction=                       | 0.313664    | (Hartree/Particle) |             |
| Thermal correction to Energy=                | 0.330896    |                    |             |
| Thermal correction to Enthalpy=              | 0.331841    |                    |             |
| Thermal correction to Gibbs Free Energy=     | 0.266468    |                    |             |
| Sum of electronic and zero-point Energies=   | -789.231777 |                    |             |
| Sum of electronic and thermal Energies=      | -789.214545 |                    |             |
| Sum of electronic and thermal Enthalpies=    | -789.213600 |                    |             |
| Sum of electronic and thermal Free Energies= | -789.278973 |                    |             |
| Single-point electronic energy (M06) =       | -789.12222  |                    |             |
| C                                            | -0.00005200 | -0.54782400        | 1.84442300  |
| H                                            | -0.91347000 | -1.13176900        | 1.79460300  |
| C                                            | -1.17741400 | 0.81645100         | -0.36708300 |
| C                                            | 1.17746300  | 0.81644700         | -0.36704300 |
| C                                            | -1.19913100 | 2.17774700         | -0.67439400 |
| C                                            | 1.19918500  | 2.17774800         | -0.67435100 |
| C                                            | 0.00003100  | 2.87911600         | -0.81244700 |
| H                                            | -2.14557400 | 2.67064200         | -0.87162300 |
| H                                            | 2.14563100  | 2.67064600         | -0.87155400 |
| N                                            | 0.00001900  | 0.14599000         | -0.14692300 |
| C                                            | -2.42259900 | 0.01677700         | -0.28688800 |
| C                                            | -3.65446300 | 0.60043400         | 0.06040700  |
| C                                            | -2.39790000 | -1.36179400        | -0.56545200 |
| C                                            | -4.81936500 | -0.16237200        | 0.11244900  |
| H                                            | -3.69861100 | 1.65497500         | 0.31724300  |
| C                                            | -3.56314800 | -2.12359400        | -0.51320300 |
| H                                            | -1.45220900 | -1.82032100        | -0.83451700 |
| C                                            | -4.78072500 | -1.52821900        | -0.17590700 |
| H                                            | -5.75834700 | 0.30982600         | 0.38962800  |
| H                                            | -3.52147100 | -3.18562000        | -0.74148700 |
| H                                            | -5.68930000 | -2.12286800        | -0.13373300 |
| C                                            | 2.42264800  | 0.01677800         | -0.28682700 |
| C                                            | 2.39793900  | -1.36182000        | -0.56526600 |
| C                                            | 3.65452900  | 0.60046200         | 0.06036400  |
| C                                            | 3.56318900  | -2.12361500        | -0.51300800 |
| H                                            | 1.45223500  | -1.82037300        | -0.83423900 |
| C                                            | 4.81943500  | -0.16233900        | 0.11241300  |
| H                                            | 3.69869000  | 1.65502000         | 0.31712600  |
| C                                            | 4.78078400  | -1.52820900        | -0.17582700 |
| H                                            | 3.52150100  | -3.18566100        | -0.74119400 |
| H                                            | 5.75842900  | 0.30988500         | 0.38950800  |
| H                                            | 5.68936200  | -2.12285300        | -0.13364900 |
| C                                            | -0.00031700 | 0.67835300         | 2.69749900  |
| H                                            | -0.00021700 | 0.42215400         | 3.76996000  |
| H                                            | 0.88820700  | 1.29492900         | 2.51545400  |
| H                                            | -0.88914400 | 1.29450500         | 2.51551100  |
| H                                            | 0.00003700  | 3.93321600         | -1.07243100 |
| H                                            | 0.91358200  | -1.13143600        | 1.79469500  |

**R'=CF3, R=Et**

|                                              |              |                    |             |
|----------------------------------------------|--------------|--------------------|-------------|
| Zero-point correction=                       | 0.161513     | (Hartree/Particle) |             |
| Thermal correction to Energy=                | 0.176318     |                    |             |
| Thermal correction to Enthalpy=              | 0.177262     |                    |             |
| Thermal correction to Gibbs Free Energy=     | 0.117982     |                    |             |
| Sum of electronic and zero-point Energies=   | -1001.337570 |                    |             |
| Sum of electronic and thermal Energies=      | -1001.322765 |                    |             |
| Sum of electronic and thermal Enthalpies=    | -1001.321821 |                    |             |
| Sum of electronic and thermal Free Energies= | -1001.381100 |                    |             |
| Single-point electronic energy (M06) =       | -1001.3175   |                    |             |
| C                                            | -0.00002100  | -2.02666600        | 0.50644500  |
| H                                            | -0.91030600  | -2.37161500        | 0.02996300  |
| C                                            | -1.15137100  | 0.59475000         | -0.04184300 |
| C                                            | 1.15136700   | 0.59476900         | -0.04186100 |
| C                                            | -1.19627900  | 1.81543000         | 0.61764800  |
| C                                            | 1.19626300   | 1.81546000         | 0.61760700  |
| C                                            | -0.00001100  | 2.44194300         | 0.97701700  |
| H                                            | -2.15460500  | 2.28376800         | 0.81244900  |
| H                                            | 2.15458300   | 2.28381500         | 0.81239100  |

|   |             |             |             |
|---|-------------|-------------|-------------|
| N | -0.0000100  | -0.07097100 | -0.34168100 |
| C | 0.00007600  | -1.84463400 | 1.98729500  |
| H | -0.00045600 | -2.81962800 | 2.50238800  |
| H | 0.89324500  | -1.30705000 | 2.32500300  |
| H | -0.89255200 | -1.30614200 | 2.32501600  |
| H | -0.00001400 | 3.39752400  | 1.48977400  |
| C | 2.43950400  | -0.08443400 | -0.44385100 |
| C | -2.43951200 | -0.08444600 | -0.44383900 |
| H | 0.91017400  | -2.37167600 | 0.02983400  |
| F | -2.31609100 | -0.77745300 | -1.58762100 |
| F | -3.43585400 | 0.81440100  | -0.60563500 |
| F | -2.86365300 | -0.96058200 | 0.50755900  |
| F | 2.31609100  | -0.77739500 | -1.58765800 |
| F | 3.43586900  | 0.81440000  | -0.60557700 |
| F | 2.86362100  | -0.96061900 | 0.50751700  |

**R'=Cl, R=Et**

|                                              |              |                    |             |
|----------------------------------------------|--------------|--------------------|-------------|
| Zero-point correction=                       | 0.132320     | (Hartree/Particle) |             |
| Thermal correction to Energy=                | 0.142643     |                    |             |
| Thermal correction to Enthalpy=              | 0.143587     |                    |             |
| Thermal correction to Gibbs Free Energy=     | 0.094328     |                    |             |
| Sum of electronic and zero-point Energies=   | -1246.487075 |                    |             |
| Sum of electronic and thermal Energies=      | -1246.476752 |                    |             |
| Sum of electronic and thermal Enthalpies=    | -1246.475808 |                    |             |
| Sum of electronic and thermal Free Energies= | -1246.525067 |                    |             |
| Single-point electronic energy (M06) =       | -1246.4478   |                    |             |
| C                                            | -0.00037400  | -2.09890800        | 0.32476000  |
| H                                            | -0.91149600  | -2.46051700        | -0.14108200 |
| C                                            | -1.13947500  | 0.44727900         | -0.21077100 |
| C                                            | 1.13999300   | 0.44675100         | -0.21049500 |
| C                                            | -1.20284500  | 1.63773400         | 0.49304100  |
| C                                            | 1.20372000   | 1.63716800         | 0.49335800  |
| C                                            | 0.00052700   | 2.24023500         | 0.88016300  |
| H                                            | -2.16336600  | 2.09567700         | 0.70000500  |
| H                                            | 2.16439800   | 2.09466500         | 0.70058300  |
| N                                            | 0.00013500   | -0.21809800        | -0.51407600 |
| C                                            | -0.00195000  | -1.90022800        | 1.80599300  |
| H                                            | -0.00172000  | -2.86740100        | 2.33420500  |
| H                                            | 0.88680700   | -1.35270300        | 2.14220000  |
| H                                            | -0.89211300  | -1.35400400        | 2.14055700  |
| H                                            | 0.00067100   | 3.16535900         | 1.44666100  |
| Cl                                           | 2.63182600   | -0.28862500        | -0.79503600 |
| Cl                                           | -2.63145400  | -0.28753000        | -0.79565600 |
| H                                            | 0.91197700   | -2.45993800        | -0.13911700 |

**R'=tBu, R=Et**

|                                              |             |                    |             |
|----------------------------------------------|-------------|--------------------|-------------|
| Zero-point correction=                       | 0.377570    | (Hartree/Particle) |             |
| Thermal correction to Energy=                | 0.396469    |                    |             |
| Thermal correction to Enthalpy=              | 0.397413    |                    |             |
| Thermal correction to Gibbs Free Energy=     | 0.332007    |                    |             |
| Sum of electronic and zero-point Energies=   | -641.549332 |                    |             |
| Sum of electronic and thermal Energies=      | -641.530433 |                    |             |
| Sum of electronic and thermal Enthalpies=    | -641.529489 |                    |             |
| Sum of electronic and thermal Free Energies= | -641.594895 |                    |             |
| Single-point electronic energy (M06) =       | -641.58933  |                    |             |
| C                                            | 0.00001700  | -1.74111800        | 1.16149400  |
| H                                            | 0.90127200  | -2.26302800        | 0.85567500  |
| C                                            | -1.18229400 | 0.47501000         | 0.00506400  |
| C                                            | 1.18237700  | 0.47494300         | 0.00517800  |
| C                                            | -1.19884400 | 1.71607600         | 0.63213600  |
| C                                            | 1.19894300  | 1.71599800         | 0.63227100  |
| C                                            | 0.00004900  | 2.33092900         | 1.00677900  |
| H                                            | -2.14033900 | 2.23317500         | 0.79079700  |
| H                                            | 2.14045700  | 2.23303700         | 0.79102700  |
| N                                            | 0.00003300  | -0.22215800        | -0.15444900 |
| C                                            | -0.00063400 | -1.16927200        | 2.54708500  |
| H                                            | -0.88755700 | -0.55133400        | 2.72654200  |
| H                                            | -0.00045500 | -1.96788600        | 3.30635200  |
| H                                            | 0.88562600  | -0.55050600        | 2.72698500  |
| H                                            | 0.00005100  | 3.29230700         | 1.51170100  |
| C                                            | 2.47972800  | -0.15160900        | -0.54800200 |
| C                                            | -2.47962700 | -0.15153500        | -0.54815400 |
| C                                            | -3.38229700 | -0.66545200        | 0.60049100  |

|   |             |             |             |
|---|-------------|-------------|-------------|
| H | -4.32459100 | -1.05824000 | 0.19832700  |
| H | -2.90449600 | -1.46805800 | 1.17114100  |
| H | -3.62800900 | 0.14084800  | 1.30106400  |
| C | -2.18402200 | -1.29935100 | -1.53474800 |
| H | -1.65730100 | -2.13437800 | -1.06895100 |
| H | -3.12803600 | -1.68051100 | -1.94294300 |
| H | -1.56763900 | -0.94976900 | -2.36913100 |
| C | -3.27033800 | 0.92642500  | -1.33256600 |
| H | -4.16114400 | 0.47659000  | -1.78769100 |
| H | -3.61147600 | 1.74574200  | -0.69165900 |
| C | -2.66034500 | 1.35701300  | -2.13431900 |
| H | 2.18421400  | -1.29970700 | -1.53430100 |
| H | 3.12825300  | -1.68073300 | -1.94256200 |
| H | 1.65777800  | -2.13477300 | -1.06825000 |
| H | 1.56760900  | -0.95046200 | -2.36865900 |
| C | 3.38256900  | -0.66510800 | 0.60069100  |
| H | 4.32489300  | -1.05784400 | 0.19854700  |
| H | 3.62820800  | 0.14139000  | 1.30106200  |
| H | 2.90494100  | -1.46765400 | 1.17157400  |
| C | 3.27020900  | 0.92627800  | -1.33275700 |
| H | 3.61116800  | 1.74586100  | -0.69209500 |
| H | 4.16110500  | 0.47649800  | -1.78776000 |
| H | 2.66011400  | 1.35650200  | -2.13462900 |
| H | -0.90062100 | -2.26372700 | 0.85503000  |

**R'=H, R=iPr**

|                                              |             |                    |             |
|----------------------------------------------|-------------|--------------------|-------------|
| Zero-point correction=                       | 0.179888    | (Hartree/Particle) |             |
| Thermal correction to Energy=                | 0.189290    |                    |             |
| Thermal correction to Enthalpy=              | 0.190235    |                    |             |
| Thermal correction to Gibbs Free Energy=     | 0.144371    |                    |             |
| Sum of electronic and zero-point Energies=   | -366.564620 |                    |             |
| Sum of electronic and thermal Energies=      | -366.555218 |                    |             |
| Sum of electronic and thermal Enthalpies=    | -366.554274 |                    |             |
| Sum of electronic and thermal Free Energies= | -366.600137 |                    |             |
| Single-point electronic energy (M06) =       | -366.54903  |                    |             |
| C                                            | 1.86841700  | -0.48637600        | -0.06333900 |
| H                                            | 1.95331400  | -1.38299400        | -0.67686200 |
| C                                            | -0.80770900 | -1.01610500        | -0.80762700 |
| C                                            | -0.45791900 | 1.19602500         | -0.22733800 |
| C                                            | -2.05272100 | -1.02245800        | -0.20149400 |
| C                                            | -1.68853700 | 1.26564600         | 0.40776000  |
| C                                            | -2.51834300 | 0.13759000         | 0.43471400  |
| H                                            | -2.66394800 | -1.92001200        | -0.24728100 |
| H                                            | -2.00685400 | 2.20547300         | 0.85142600  |
| N                                            | 0.02655300  | 0.06519500         | -0.81974400 |
| C                                            | 2.77750100  | 0.63521000         | -0.46632100 |
| H                                            | 2.53002500  | 1.56277400         | 0.06648800  |
| H                                            | 3.82956400  | 0.40753800         | -0.22865600 |
| H                                            | 2.71450600  | 0.82850800         | -1.54266000 |
| C                                            | 1.62727300  | -0.72862500        | 1.39533500  |
| H                                            | 2.53857500  | -1.07873500        | 1.90849900  |
| H                                            | 1.30912700  | 0.19323300         | 1.90073200  |
| H                                            | 0.85119400  | -1.48676000        | 1.55374500  |
| H                                            | -0.42937400 | -1.90185700        | -1.31402000 |
| H                                            | 0.18904500  | 2.06810400         | -0.28335300 |
| H                                            | -3.48882100 | 0.16292200         | 0.92001000  |

**R'=Me, R=iPr**

|                                              |             |                    |             |
|----------------------------------------------|-------------|--------------------|-------------|
| Zero-point correction=                       | 0.235786    | (Hartree/Particle) |             |
| Thermal correction to Energy=                | 0.248383    |                    |             |
| Thermal correction to Enthalpy=              | 0.249327    |                    |             |
| Thermal correction to Gibbs Free Energy=     | 0.196755    |                    |             |
| Sum of electronic and zero-point Energies=   | -445.143130 |                    |             |
| Sum of electronic and thermal Energies=      | -445.130533 |                    |             |
| Sum of electronic and thermal Enthalpies=    | -445.129589 |                    |             |
| Sum of electronic and thermal Free Energies= | -445.182162 |                    |             |
| Single-point electronic energy (M06) =       | -445.14119  |                    |             |
| C                                            | -1.67204300 | 0.66857600         | 0.42994200  |
| H                                            | -1.44036200 | 1.73090600         | 0.44956600  |
| C                                            | 0.99417000  | 1.05653500         | -0.29993300 |
| C                                            | 0.31273700  | -1.18980100        | -0.40569700 |
| C                                            | 2.19780500  | 0.68683100         | 0.28538100  |
| C                                            | 1.50326600  | -1.60009600        | 0.17917600  |

|   |             |             |             |
|---|-------------|-------------|-------------|
| C | 2.46248800  | -0.65805000 | 0.56706400  |
| H | 2.94763700  | 1.44998500  | 0.47941200  |
| H | 1.69847600  | -2.66401000 | 0.28851200  |
| N | -0.00070500 | 0.14233200  | -0.57751800 |
| C | -2.85086100 | 0.35640700  | -0.45024100 |
| H | -3.12559200 | -0.70298700 | -0.42163100 |
| H | -3.73764000 | 0.92887100  | -0.13351400 |
| H | -2.64053000 | 0.62551600  | -1.49170300 |
| C | -1.57549300 | 0.01786800  | 1.78080000  |
| H | -2.38890900 | 0.35734900  | 2.44346500  |
| H | -1.65012700 | -1.07407100 | 1.71871600  |
| H | -0.62830200 | 0.26395800  | 2.27412200  |
| H | 3.39794700  | -0.96356700 | 1.02520400  |
| C | -0.68918800 | -2.19406600 | -0.91509900 |
| H | -1.55382600 | -2.29582100 | -0.24771300 |
| H | -1.07397100 | -1.89104700 | -1.89512800 |
| H | -0.23200100 | -3.18395900 | -1.01008300 |
| C | 0.72657900  | 2.49158800  | -0.68394200 |
| H | 0.21151100  | 3.05236600  | 0.10808300  |
| H | 1.66448200  | 3.01793500  | -0.88925700 |
| H | 0.09938500  | 2.53749500  | -1.58013400 |

**R'=Ph, R=iPr**

|                                              |             |                    |             |
|----------------------------------------------|-------------|--------------------|-------------|
| Zero-point correction=                       | 0.342272    | (Hartree/Particle) |             |
| Thermal correction to Energy=                | 0.360822    |                    |             |
| Thermal correction to Enthalpy=              | 0.361766    |                    |             |
| Thermal correction to Gibbs Free Energy=     | 0.293837    |                    |             |
| Sum of electronic and zero-point Energies=   | -828.519544 |                    |             |
| Sum of electronic and thermal Energies=      | -828.500995 |                    |             |
| Sum of electronic and thermal Enthalpies=    | -828.500050 |                    |             |
| Sum of electronic and thermal Free Energies= | -828.567980 |                    |             |
| Single-point electronic energy (M06) =       | -828.41989  |                    |             |
| C                                            | -0.14944500 | -0.49966600        | 1.80185900  |
| H                                            | -1.23681100 | -0.50961700        | 1.81247200  |
| C                                            | -1.24500000 | 0.94387600         | -0.32035000 |
| C                                            | 1.11086100  | 0.94998800         | -0.33311400 |
| C                                            | -1.26985400 | 2.32613200         | -0.49596100 |
| C                                            | 1.12713300  | 2.33410300         | -0.50297800 |
| C                                            | -0.07323700 | 3.04598600         | -0.55614900 |
| H                                            | -2.21748300 | 2.83018000         | -0.65691900 |
| H                                            | 2.07222900  | 2.84156800         | -0.66945400 |
| N                                            | -0.06279700 | 0.25544100         | -0.13717700 |
| C                                            | -2.48639400 | 0.13592800         | -0.34182800 |
| C                                            | -3.72890600 | 0.67555000         | 0.04037200  |
| C                                            | -2.44984800 | -1.20738100        | -0.75969100 |
| C                                            | -4.89002000 | -0.09298100        | -0.00863500 |
| H                                            | -3.78327400 | 1.69783900         | 0.40358400  |
| C                                            | -3.61159600 | -1.97447700        | -0.80874000 |
| H                                            | -1.49732600 | -1.63229400        | -1.05788900 |
| C                                            | -4.83887000 | -1.42184400        | -0.43532200 |
| H                                            | -5.83654500 | 0.34487100         | 0.29791300  |
| H                                            | -3.55972600 | -3.00708400        | -1.14480400 |
| H                                            | -5.74470600 | -2.02102800        | -0.47161600 |
| C                                            | 2.36118300  | 0.15729200         | -0.40481200 |
| C                                            | 2.35079500  | -1.13385400        | -0.96237600 |
| C                                            | 3.59074200  | 0.67717700         | 0.03934300  |
| C                                            | 3.52570800  | -1.87306300        | -1.07804400 |
| H                                            | 1.40819200  | -1.54179000        | -1.31185800 |
| C                                            | 4.76572400  | -0.06429400        | -0.07391700 |
| H                                            | 3.62272400  | 1.66180800         | 0.49785000  |
| C                                            | 4.73997400  | -1.34286300        | -0.63444400 |
| H                                            | 3.49508700  | -2.86545700        | -1.52083400 |
| H                                            | 5.70227400  | 0.35518500         | 0.28453200  |
| H                                            | 5.65580600  | -1.92112400        | -0.72248700 |
| C                                            | 0.47167700  | -1.86486300        | 1.81072100  |
| H                                            | 1.55438300  | -1.82496000        | 1.65880100  |
| H                                            | 0.29553400  | -2.35457000        | 2.78391500  |
| H                                            | 0.03626900  | -2.50778500        | 1.03951400  |
| C                                            | 0.47262700  | 0.56621000         | 2.65334100  |
| H                                            | 0.38061200  | 0.30994900         | 3.72200700  |
| H                                            | 1.54294800  | 0.67673900         | 2.44302400  |

|   |             |            |             |
|---|-------------|------------|-------------|
| H | -0.01264900 | 1.53710900 | 2.50664100  |
| H | -0.07748400 | 4.12064200 | -0.70980800 |

**R'=CF3, R=iPr**

|                                              |              |                    |             |
|----------------------------------------------|--------------|--------------------|-------------|
| Zero-point correction=                       | 0.190042     | (Hartree/Particle) |             |
| Thermal correction to Energy=                | 0.206264     |                    |             |
| Thermal correction to Enthalpy=              | 0.207208     |                    |             |
| Thermal correction to Gibbs Free Energy=     | 0.145177     |                    |             |
| Sum of electronic and zero-point Energies=   | -1040.626580 |                    |             |
| Sum of electronic and thermal Energies=      | -1040.610358 |                    |             |
| Sum of electronic and thermal Enthalpies=    | -1040.609414 |                    |             |
| Sum of electronic and thermal Free Energies= | -1040.671445 |                    |             |
| Single-point electronic energy (M06) =       | -1040.6151   |                    |             |
| C                                            | -0.07882900  | -1.80418200        | 0.80090900  |
| H                                            | -1.15934000  | -1.89533600        | 0.76182000  |
| C                                            | -1.24566900  | 0.66184700         | 0.00144700  |
| C                                            | 1.05581800   | 0.78040000         | -0.00228000 |
| C                                            | -1.35389200  | 1.89224500         | 0.62974600  |
| C                                            | 1.03420000   | 2.01168300         | 0.63892800  |
| C                                            | -0.19109200  | 2.57472800         | 1.00562700  |
| H                                            | -2.33444200  | 2.33032500         | 0.78414400  |
| H                                            | 1.96345800   | 2.54651800         | 0.80152300  |
| N                                            | -0.06028100  | 0.02250800         | -0.24260700 |
| C                                            | 0.64287300   | -2.77570100        | -0.08150100 |
| H                                            | 1.72096800   | -2.60189900        | -0.09624500 |
| H                                            | 0.47884000   | -3.80202800        | 0.28557200  |
| H                                            | 0.26149000   | -2.72612800        | -1.10575800 |
| C                                            | 0.45807200   | -1.48213000        | 2.16208300  |
| H                                            | 0.40128600   | -2.37256800        | 2.80982300  |
| H                                            | 1.50766000   | -1.17662300        | 2.12713700  |
| H                                            | -0.12587100  | -0.69291800        | 2.64866000  |
| H                                            | -0.24041800  | 3.53442900         | 1.50795900  |
| C                                            | 2.36904800   | 0.23814600         | -0.51604800 |
| C                                            | -2.50534200  | -0.04435300        | -0.44527600 |
| F                                            | 3.24976800   | 1.23943600         | -0.74165800 |
| F                                            | 2.97967500   | -0.60430100        | 0.36606800  |
| F                                            | 2.21930600   | -0.44540300        | -1.66282800 |
| F                                            | -2.27531800  | -0.93482100        | -1.42327100 |
| F                                            | -3.42406600  | 0.84100700         | -0.89256500 |
| F                                            | -3.10078800  | -0.72007500        | 0.57778800  |

**R'=Cl, R=iPr**

|                                              |              |                    |             |
|----------------------------------------------|--------------|--------------------|-------------|
| Zero-point correction=                       | 0.160874     | (Hartree/Particle) |             |
| Thermal correction to Energy=                | 0.172553     |                    |             |
| Thermal correction to Enthalpy=              | 0.173497     |                    |             |
| Thermal correction to Gibbs Free Energy=     | 0.121748     |                    |             |
| Sum of electronic and zero-point Energies=   | -1285.776172 |                    |             |
| Sum of electronic and thermal Energies=      | -1285.764493 |                    |             |
| Sum of electronic and thermal Enthalpies=    | -1285.763549 |                    |             |
| Sum of electronic and thermal Free Energies= | -1285.815298 |                    |             |
| Single-point electronic energy (M06) =       | -1285.7453   |                    |             |
| C                                            | 0.41507700   | -1.72321200        | 0.67741900  |
| H                                            | -0.61426600  | -2.03795000        | 0.83558900  |
| C                                            | -1.39083400  | 0.26511200         | -0.14398700 |
| C                                            | 0.77711200   | 0.96009900         | -0.25064500 |
| C                                            | -1.81074100  | 1.45106000         | 0.42806700  |
| C                                            | 0.47720900   | 2.18569500         | 0.31692900  |
| C                                            | -0.84598000  | 2.43021700         | 0.70596300  |
| H                                            | -2.86534500  | 1.62029300         | 0.61378000  |
| H                                            | 1.24882900   | 2.94119800         | 0.41327300  |
| N                                            | -0.09769400  | -0.06831000        | -0.39994400 |
| C                                            | 1.17560700   | -2.59608600        | -0.27598600 |
| H                                            | 2.17337800   | -2.19969600        | -0.48569100 |
| H                                            | 1.30050400   | -3.60434000        | 0.15130100  |
| H                                            | 0.63842000   | -2.70231800        | -1.22350300 |
| C                                            | 1.09922400   | -1.21743200        | 1.91278000  |
| H                                            | 1.29909100   | -2.05304800        | 2.60312100  |
| H                                            | 2.06397700   | -0.75103300        | 1.68620500  |
| H                                            | 0.47857700   | -0.49395000        | 2.45316500  |
| H                                            | -1.12411600  | 3.36796100         | 1.17478800  |
| Cl                                           | 2.40313400   | 0.68891700         | -0.88534900 |
| Cl                                           | -2.59697100  | -0.93254400        | -0.62321900 |

**R<sup>+</sup>=tBu, R<sup>-</sup>=iPr**

|                                              |                             |
|----------------------------------------------|-----------------------------|
| Zero-point correction=                       | 0.406663 (Hartree/Particle) |
| Thermal correction to Energy=                | 0.426629                    |
| Thermal correction to Enthalpy=              | 0.427573                    |
| Thermal correction to Gibbs Free Energy=     | 0.360668                    |
| Sum of electronic and zero-point Energies=   | -680.832042                 |
| Sum of electronic and thermal Energies=      | -680.812076                 |
| Sum of electronic and thermal Enthalpies=    | -680.811132                 |
| Sum of electronic and thermal Free Energies= | -680.878037                 |
| Single-point electronic energy (M06) =       | -680.88171                  |

|   |             |             |             |
|---|-------------|-------------|-------------|
| C | 0.13486800  | 1.82369300  | 0.80410000  |
| H | 1.22101000  | 1.86818800  | 0.80069000  |
| C | 1.24254800  | -0.53679100 | 0.20014100  |
| C | -1.11932600 | -0.61814700 | 0.17196000  |
| C | 1.28521500  | -1.54221300 | 1.15520300  |
| C | -1.10953400 | -1.61286000 | 1.14436000  |
| C | 0.09704200  | -2.04402800 | 1.70407100  |
| H | 2.23737700  | -1.98185000 | 1.43853600  |
| H | -2.03606900 | -2.10295700 | 1.42769900  |
| N | 0.04295700  | 0.08092100  | -0.13625000 |
| C | -0.47714400 | 2.93241500  | -0.00992500 |
| H | -1.56898400 | 2.87192500  | -0.04686900 |
| H | -0.22846400 | 3.90587400  | 0.44317100  |
| H | -0.09617200 | 2.94167500  | -1.03559900 |
| C | -0.42029100 | 1.60612000  | 2.18656200  |
| H | -0.30191400 | 2.52098400  | 2.78929300  |
| H | -1.48894400 | 1.36779300  | 2.16906000  |
| H | 0.10195500  | 0.79648000  | 2.70413100  |
| H | 0.11535100  | -2.80944700 | 2.47408800  |
| C | -2.40422400 | -0.32574000 | -0.63617800 |
| C | 2.52570800  | -0.12987700 | -0.55966700 |
| C | 3.62636700  | 0.35996700  | 0.41066400  |
| H | 4.54277300  | 0.59831100  | -0.14331300 |
| H | 3.31920500  | 1.26327600  | 0.95018900  |
| H | 3.87848200  | -0.40165600 | 1.15620200  |
| C | 2.27376300  | 0.95161800  | -1.62799700 |
| H | 2.01103200  | 1.91910100  | -1.19259300 |
| H | 3.18654900  | 1.09537400  | -2.21837800 |
| H | 1.46582200  | 0.66145300  | -2.30492800 |
| C | 3.04965900  | -1.38931700 | -1.30006200 |
| H | 3.95951200  | -1.14733200 | -1.86402000 |
| H | 3.29122300  | -2.20088400 | -0.60627800 |
| H | 2.30169500  | -1.76560000 | -2.00703200 |
| C | -2.08988400 | 0.42824200  | -1.94323600 |
| H | -3.01614800 | 0.57694200  | -2.51195400 |
| H | -1.63957100 | 1.40442800  | -1.76592800 |
| H | -1.39641800 | -0.14496900 | -2.56763700 |
| C | -3.43946100 | 0.46958400  | 0.19453600  |
| H | -4.36986800 | 0.59401200  | -0.37385000 |
| H | -3.68455000 | -0.05411400 | 1.12597300  |
| H | -3.07747200 | 1.46776400  | 0.45802100  |
| C | -3.06200800 | -1.67070900 | -1.04186400 |
| H | -3.42546900 | -2.23784600 | -0.17900100 |
| H | -3.92482100 | -1.47949000 | -1.69159600 |
| H | -2.35760000 | -2.30562300 | -1.59033700 |

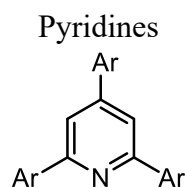

**Ar=Ph**

|                                            |                             |
|--------------------------------------------|-----------------------------|
| Zero-point correction=                     | 0.332101 (Hartree/Particle) |
| Thermal correction to Energy=              | 0.350321                    |
| Thermal correction to Enthalpy=            | 0.351265                    |
| Thermal correction to Gibbs Free Energy=   | 0.283764                    |
| Sum of electronic and zero-point Energies= | -941.131314                 |
| Sum of electronic and thermal Energies=    | -941.113094                 |
| Sum of electronic and thermal Enthalpies=  | -941.112150                 |

|                                              |               |
|----------------------------------------------|---------------|
| Sum of electronic and thermal Free Energies= | -941.179651   |
| Single-point electronic energy (M06) =       | -940.96754439 |

|   |             |             |             |
|---|-------------|-------------|-------------|
| C | -0.76765100 | -1.19627000 | -0.01396800 |
| C | 0.63393200  | -1.15960600 | 0.00686500  |
| C | 0.63393200  | 1.15960500  | -0.00681100 |
| C | -0.76765000 | 1.19627000  | 0.01400600  |
| C | -1.49410700 | 0.00000000  | 0.00001700  |
| H | -1.29173400 | -2.14507500 | -0.02984500 |
| H | -1.29173100 | 2.14507700  | 0.02987100  |
| C | -2.97945200 | 0.00000100  | 0.00000700  |
| C | -3.69859900 | 0.93080800  | 0.76758900  |
| C | -3.69858500 | -0.93080900 | -0.76758900 |
| C | -5.09264500 | 0.92933400  | 0.76926300  |
| H | -3.16035500 | 1.64241600  | 1.38747400  |
| C | -5.09263000 | -0.92934000 | -0.76928500 |
| H | -3.16032800 | -1.64241500 | -1.38746600 |
| C | -5.79524500 | -0.00000400 | -0.00001600 |
| H | -5.63042400 | 1.65130000  | 1.37801300  |
| H | -5.63039800 | -1.65130700 | -1.37804200 |
| H | -6.88182600 | -0.00000700 | -0.00002400 |
| C | 1.44906100  | 2.40537400  | -0.01882800 |
| C | 0.93644300  | 3.62159700  | -0.49816600 |
| C | 2.77086900  | 2.37659600  | 0.45514100  |
| C | 1.71713500  | 4.77686300  | -0.49215100 |
| H | -0.06936600 | 3.66522200  | -0.90575300 |
| C | 3.54859500  | 3.53195200  | 0.46500500  |
| H | 3.17089900  | 1.43519900  | 0.81547500  |
| C | 3.02507400  | 4.73813800  | -0.00658200 |
| H | 1.30443500  | 5.70638300  | -0.87549200 |
| H | 4.56678700  | 3.49156600  | 0.84335800  |
| H | 3.63296000  | 5.63900500  | -0.00060700 |
| C | 1.44906400  | -2.40537400 | 0.01885400  |
| C | 2.77087100  | -2.37658000 | -0.45511900 |
| C | 0.93644700  | -3.62161400 | 0.49814700  |
| C | 3.54860200  | -3.53193100 | -0.46501300 |
| H | 3.17089600  | -1.43517000 | -0.81542600 |
| C | 1.71714300  | -4.77687700 | 0.49210000  |
| H | -0.06936400 | -3.66525800 | 0.90572700  |
| C | 3.02508400  | -4.73813200 | 0.00653800  |
| H | 4.56679400  | -3.49153300 | -0.84336400 |
| H | 1.30444500  | -5.70641000 | 0.87541100  |
| H | 3.63297400  | -5.63899600 | 0.00053800  |
| N | 1.31160300  | -0.00000100 | 0.00002000  |

**Ar=4-Me-Ph**

|                                              |                             |
|----------------------------------------------|-----------------------------|
| Zero-point correction=                       | 0.414574 (Hartree/Particle) |
| Thermal correction to Energy=                | 0.438549                    |
| Thermal correction to Enthalpy=              | 0.439493                    |
| Thermal correction to Gibbs Free Energy=     | 0.356785                    |
| Sum of electronic and zero-point Energies=   | -1059.003663                |
| Sum of electronic and thermal Energies=      | -1058.979688                |
| Sum of electronic and thermal Enthalpies=    | -1058.978743                |
| Sum of electronic and thermal Free Energies= | -1059.061451                |
| Single-point electronic energy (M06) =       | -1058.8533696               |

|   |             |             |             |
|---|-------------|-------------|-------------|
| C | -0.77901200 | -1.20299100 | -0.01099100 |
| C | 0.62247300  | -1.15703300 | 0.00861800  |
| C | 0.60661600  | 1.16258400  | -0.00789900 |
| C | -0.79531500 | 1.18935400  | 0.01370400  |
| C | -1.51408500 | -0.01179300 | 0.00171600  |
| H | -1.29652900 | -2.15545000 | -0.02442400 |
| H | -1.32580500 | 2.13464900  | 0.02809100  |
| C | -2.99847700 | -0.02120300 | 0.00199000  |
| C | -3.72869400 | 0.91072700  | 0.75717700  |
| C | -3.71759800 | -0.96378700 | -0.74912700 |
| C | -5.12103200 | 0.89687400  | 0.75984100  |
| H | -3.20003100 | 1.63342600  | 1.37265500  |
| C | -5.11077500 | -0.96968200 | -0.74667100 |
| H | -3.18117500 | -1.68482600 | -1.35978300 |
| C | -5.84001800 | -0.03971800 | 0.00494700  |
| H | -5.65965200 | 1.62190700  | 1.36624600  |
| H | -5.64142800 | -1.70739600 | -1.34455000 |
| C | 1.41195700  | 2.41331300  | -0.02204600 |



|   |             |             |             |
|---|-------------|-------------|-------------|
| C | 0.89186700  | 3.63063500  | -0.48755900 |
| C | 2.74079600  | 2.39688800  | 0.43155500  |
| C | 1.66749500  | 4.78819000  | -0.48587500 |
| H | -0.11751000 | 3.67568700  | -0.88634200 |
| C | 3.50851000  | 3.55698900  | 0.43490400  |
| H | 3.15782000  | 1.45804300  | 0.77931400  |
| C | 2.98724100  | 4.77719500  | -0.01822000 |
| H | 1.24171400  | 5.71508300  | -0.86421300 |
| H | 4.53407900  | 3.51628000  | 0.79623000  |
| C | 1.44500400  | -2.39652100 | 0.02176000  |
| C | 2.77250900  | -2.36185600 | -0.43480000 |
| C | 0.94295500  | -3.62059400 | 0.48927800  |
| C | 3.55630200  | -3.51110900 | -0.43899900 |
| H | 3.17565400  | -1.41753700 | -0.78410100 |
| C | 1.73471100  | -4.76722500 | 0.48681900  |
| H | -0.06485400 | -3.67939200 | 0.89024500  |
| C | 3.05312400  | -4.73812200 | 0.01627800  |
| H | 4.58041000  | -3.45640600 | -0.80262400 |
| H | 1.32278000  | -5.69967500 | 0.86682000  |
| N | 1.29248300  | 0.00740600  | -0.00015000 |
| C | 3.89935000  | -5.98875000 | -0.01781400 |
| H | 3.56657000  | -6.71905500 | 0.72736100  |
| H | 3.84684000  | -6.47845600 | -0.99975900 |
| H | 4.95441700  | -5.76493200 | 0.17449400  |
| C | 3.81569300  | 6.03967500  | 0.01520200  |
| H | 3.47479200  | 6.76348100  | -0.73266700 |
| H | 3.75338500  | 6.53100400  | 0.99577200  |
| H | 4.87433600  | 5.83031000  | -0.17356500 |
| C | -7.35031800 | -0.02921800 | -0.01551800 |
| H | -7.76298100 | 0.25674900  | 0.95815700  |
| H | -7.73301600 | 0.68963100  | -0.75254200 |
| H | -7.75486700 | -1.01189100 | -0.27939400 |

**Ar=4-MeO-Ph**

|                                              |                             |             |             |
|----------------------------------------------|-----------------------------|-------------|-------------|
| Zero-point correction=                       | 0.430231 (Hartree/Particle) |             |             |
| Thermal correction to Energy=                | 0.456366                    |             |             |
| Thermal correction to Enthalpy=              | 0.457310                    |             |             |
| Thermal correction to Gibbs Free Energy=     | 0.371414                    |             |             |
| Sum of electronic and zero-point Energies=   | -1284.602968                |             |             |
| Sum of electronic and thermal Energies=      | -1284.576833                |             |             |
| Sum of electronic and thermal Enthalpies=    | -1284.575889                |             |             |
| Sum of electronic and thermal Free Energies= | -1284.661785                |             |             |
| Single-point electronic energy (M06) =       | -1284.45413195              |             |             |
| C                                            | 0.98612300                  | 1.07011500  | 0.05273300  |
| C                                            | -0.41291000                 | 1.16825500  | 0.04699600  |
| C                                            | -0.63395300                 | -1.14154400 | -0.01429900 |
| C                                            | 0.75766000                  | -1.31161800 | 0.02715600  |
| C                                            | 1.59608500                  | -0.19038400 | 0.05158800  |
| H                                            | 1.59900400                  | 1.96401400  | 0.07077900  |
| H                                            | 1.18887000                  | -2.30607500 | 0.02890300  |
| C                                            | 3.07223800                  | -0.33307300 | 0.07514400  |
| C                                            | 3.69292100                  | -1.37231300 | 0.79452200  |
| C                                            | 3.90028000                  | 0.55935200  | -0.61821000 |
| C                                            | 5.07289900                  | -1.50900200 | 0.82034900  |
| H                                            | 3.08304300                  | -2.06734500 | 1.36470300  |
| C                                            | 5.29025100                  | 0.43332900  | -0.60638800 |
| H                                            | 3.45401000                  | 1.35717700  | -1.20534500 |
| C                                            | 5.88543000                  | -0.60624600 | 0.11787400  |
| H                                            | 5.54923000                  | -2.30350300 | 1.38627000  |
| H                                            | 5.89120100                  | 1.13937300  | -1.16807900 |
| C                                            | -1.56307200                 | -2.30054400 | -0.06275800 |
| C                                            | -1.15824700                 | -3.57246200 | -0.50894800 |
| C                                            | -2.89632600                 | -2.14735100 | 0.34047100  |
| C                                            | -2.04169400                 | -4.64188200 | -0.53821300 |
| H                                            | -0.14427800                 | -3.72834900 | -0.86513000 |
| C                                            | -3.79526900                 | -3.21277800 | 0.32090500  |
| C                                            | -3.22381100                 | -1.17020000 | 0.67814300  |
| H                                            | -3.36919000                 | -4.47226800 | -0.11863500 |
| H                                            | -1.72997400                 | -5.61976100 | -0.89184500 |
| H                                            | -4.81552100                 | -3.05199600 | 0.65073400  |
| C                                            | -1.10547400                 | 2.48311100  | 0.07063300  |

|   |             |             |             |
|---|-------------|-------------|-------------|
| C | -2.42994700 | 2.58649000  | -0.37518800 |
| C | -0.48038500 | 3.65503500  | 0.53598600  |
| C | -3.11002800 | 3.80352700  | -0.37736400 |
| H | -2.92654800 | 1.68936800  | -0.72831200 |
| C | -1.14470100 | 4.87303300  | 0.54394800  |
| H | 0.53273500  | 3.61506400  | 0.92492200  |
| C | -2.46653400 | 4.95899200  | 0.08295900  |
| H | -4.13129600 | 3.83965100  | -0.73967000 |
| H | -0.66411000 | 5.77373200  | 0.91309000  |
| N | -1.19784100 | 0.07820300  | 0.00459000  |
| O | -3.03151100 | 6.20052200  | 0.12809000  |
| O | 7.22861300  | -0.82576200 | 0.20345500  |
| O | -4.15797300 | -5.58427200 | -0.18021500 |
| C | 8.09974500  | 0.06450200  | -0.47654300 |
| H | 9.11101700  | -0.28965100 | -0.26872500 |
| H | 7.92624600  | 0.04987700  | -1.56066200 |
| H | 7.99259800  | 1.09332700  | -0.10821300 |
| C | -4.37318800 | 6.34340200  | -0.30993700 |
| H | -4.61893300 | 7.39934500  | -0.18235500 |
| H | -4.48439700 | 6.07074600  | -1.36783100 |
| H | -5.06147400 | 5.73557300  | 0.29216900  |
| C | -5.51375600 | -5.46831300 | 0.22060200  |
| H | -5.95063100 | -6.46004800 | 0.08914800  |
| H | -5.59989000 | -5.17126400 | 1.27424200  |
| H | -6.05899000 | -4.74659100 | -0.40198800 |

**Ar=4-CF3-Ph**

|                                              |                             |             |             |
|----------------------------------------------|-----------------------------|-------------|-------------|
| Zero-point correction=                       | 0.346222 (Hartree/Particle) |             |             |
| Thermal correction to Energy=                | 0.375484                    |             |             |
| Thermal correction to Enthalpy=              | 0.376428                    |             |             |
| Thermal correction to Gibbs Free Energy=     | 0.279721                    |             |             |
| Sum of electronic and zero-point Energies=   | -1952.229041                |             |             |
| Sum of electronic and thermal Energies=      | -1952.199778                |             |             |
| Sum of electronic and thermal Enthalpies=    | -1952.198834                |             |             |
| Sum of electronic and thermal Free Energies= | -1952.295541                |             |             |
| Single-point electronic energy (M06) =       | -1952.07201957              |             |             |
| C                                            | -0.79429300                 | -1.22623700 | 0.00639200  |
| C                                            | 0.60566800                  | -1.15155000 | 0.02177700  |
| C                                            | 0.54498500                  | 1.16528200  | -0.01135000 |
| C                                            | -0.85680700                 | 1.16679000  | 0.01400200  |
| C                                            | -1.55041200                 | -0.04867000 | 0.01268000  |
| H                                            | -1.29367900                 | -2.18831000 | 0.00060300  |
| H                                            | -1.40559600                 | 2.10155200  | 0.02352100  |
| C                                            | -3.03501700                 | -0.08665200 | 0.01756800  |
| C                                            | -3.77443600                 | 0.82481200  | 0.78873700  |
| C                                            | -3.73237400                 | -1.03665000 | -0.74610000 |
| C                                            | -5.16573200                 | 0.78967600  | 0.79693000  |
| H                                            | -3.25535700                 | 1.54850900  | 1.41009300  |
| C                                            | -5.12374200                 | -1.07294800 | -0.74405400 |
| H                                            | -3.18141400                 | -1.73786900 | -1.36572300 |
| C                                            | -5.84453400                 | -0.15930500 | 0.02867300  |
| H                                            | -5.72463000                 | 1.48868400  | 1.41021400  |
| H                                            | -5.65007900                 | -1.80989800 | -1.34155400 |
| C                                            | 1.32837400                  | 2.43089500  | -0.03616900 |
| C                                            | 0.78286600                  | 3.62994100  | -0.52118200 |
| C                                            | 2.65410900                  | 2.43756500  | 0.42726800  |
| C                                            | 1.53118800                  | 4.80383800  | -0.52857100 |
| H                                            | -0.22415300                 | 3.64852100  | -0.92609600 |
| C                                            | 3.40389500                  | 3.60846300  | 0.42451600  |
| H                                            | 3.08348900                  | 1.51009300  | 0.78857900  |
| C                                            | 2.84339500                  | 4.79765000  | -0.05120000 |
| H                                            | 1.10195800                  | 5.72046300  | -0.91902200 |
| H                                            | 4.42687100                  | 3.60049500  | 0.78662500  |
| C                                            | 1.45492100                  | -2.37403000 | 0.04082800  |
| C                                            | 2.77547500                  | -2.31019700 | -0.43316300 |
| C                                            | 0.97815100                  | -3.59994700 | 0.53085800  |
| C                                            | 3.58675800                  | -3.43920400 | -0.43528800 |
| H                                            | 3.15187200                  | -1.36146200 | -0.79829800 |
| C                                            | 1.78835000                  | -4.73222900 | 0.53343400  |
| H                                            | -0.02334600                 | -3.67189300 | 0.94347500  |
| C                                            | 3.09448400                  | -4.65619900 | 0.04586400  |

|   |             |             |             |
|---|-------------|-------------|-------------|
| H | 4.60510900  | -3.37688000 | -0.80518500 |
| H | 1.41192600  | -5.66997800 | 0.92811800  |
| N | 1.25251800  | 0.02458900  | 0.00281400  |
| C | 3.95470200  | -5.88912300 | -0.01166400 |
| C | -7.34926000 | -0.15885600 | -0.01196800 |
| C | 3.63463400  | 6.07607400  | 0.00188400  |
| F | 3.60434300  | -6.79462200 | 0.92855500  |
| F | 3.85602800  | -6.51028000 | -1.21094100 |
| F | 5.26203800  | -5.59820700 | 0.17023000  |
| F | -7.84573000 | -1.39336800 | -0.24631900 |
| F | -7.88244700 | 0.28242600  | 1.14850400  |
| F | -7.81955600 | 0.64704800  | -0.99244700 |
| F | 4.95677100  | 5.85696600  | -0.17291200 |
| F | 3.49614000  | 6.69849700  | 1.19662300  |
| F | 3.23878200  | 6.95495200  | -0.94565400 |

#### Ar=4-F-Ph

|                                              |                             |             |             |
|----------------------------------------------|-----------------------------|-------------|-------------|
| Zero-point correction=                       | 0.307295 (Hartree/Particle) |             |             |
| Thermal correction to Energy=                | 0.328101                    |             |             |
| Thermal correction to Enthalpy=              | 0.329045                    |             |             |
| Thermal correction to Gibbs Free Energy=     | 0.255143                    |             |             |
| Sum of electronic and zero-point Energies=   | -1238.856473                |             |             |
| Sum of electronic and thermal Energies=      | -1238.835667                |             |             |
| Sum of electronic and thermal Enthalpies=    | -1238.834723                |             |             |
| Sum of electronic and thermal Free Energies= | -1238.908625                |             |             |
| Single-point electronic energy (M06) =       | -1238.69155330              |             |             |
| C                                            | 0.78913700                  | -1.19650300 | 0.01379200  |
| C                                            | -0.61239600                 | -1.15975900 | -0.00708300 |
| C                                            | -0.61254500                 | 1.15970300  | 0.00685300  |
| C                                            | 0.78899200                  | 1.19665900  | -0.01378500 |
| C                                            | 1.51525000                  | 0.00012600  | 0.00002700  |
| H                                            | 1.31381000                  | -2.14504300 | 0.02919000  |
| H                                            | 1.31350500                  | 2.14528700  | -0.02901300 |
| C                                            | 2.99985000                  | 0.00014900  | 0.00008200  |
| C                                            | 3.72071900                  | 0.93399400  | -0.76325400 |
| C                                            | 3.72080000                  | -0.93364300 | 0.76335600  |
| C                                            | 5.11375400                  | 0.93979900  | -0.77036200 |
| H                                            | 3.18554100                  | 1.64916100  | -1.38090700 |
| C                                            | 5.11382000                  | -0.93923600 | 0.77033300  |
| H                                            | 3.18581300                  | -1.64893300 | 1.38103900  |
| C                                            | 5.78941800                  | 0.00031400  | -0.00002200 |
| H                                            | 5.67665700                  | 1.65049600  | -1.36639400 |
| H                                            | 5.67699200                  | -1.64980900 | 1.36626900  |
| C                                            | -1.42897700                 | 2.40316300  | 0.01873200  |
| C                                            | -0.91802900                 | 3.62402400  | 0.48898200  |
| C                                            | -2.75504200                 | 2.36953400  | -0.44530400 |
| C                                            | -1.69521800                 | 4.78057800  | 0.48677500  |
| H                                            | 0.08977500                  | 3.67594000  | 0.88932500  |
| C                                            | -3.54301400                 | 3.51646900  | -0.45777400 |
| H                                            | -3.15636400                 | 1.42657300  | -0.79903100 |
| C                                            | -2.99786800                 | 4.70815900  | 0.00803400  |
| H                                            | -1.31070300                 | 5.72501600  | 0.85749800  |
| H                                            | -4.56485900                 | 3.50107600  | -0.82279400 |
| C                                            | -1.42867200                 | -2.40332000 | -0.01883500 |
| C                                            | -2.75480700                 | -2.36976500 | 0.44501200  |
| C                                            | -0.91750900                 | -3.62420900 | -0.48877300 |
| C                                            | -3.54264800                 | -3.51678800 | 0.45757100  |
| H                                            | -3.15629200                 | -1.42678400 | 0.79849900  |
| C                                            | -1.69456200                 | -4.78085400 | -0.48646600 |
| H                                            | 0.09036100                  | -3.67608200 | -0.88895700 |
| C                                            | -2.99729000                 | -4.70850100 | -0.00792900 |
| H                                            | -4.56455400                 | -3.50144800 | 0.82242400  |
| H                                            | -1.30988100                 | -5.72531300 | -0.85696500 |
| N                                            | -1.29002100                 | -0.00006900 | -0.00013500 |
| F                                            | -3.75503600                 | -5.82471300 | -0.00007600 |
| F                                            | -3.75573000                 | 5.82429100  | 0.00024600  |
| F                                            | 7.13758400                  | 0.00039800  | -0.00006100 |

#### Ar=3,5-diF-Ph

|                                 |                             |
|---------------------------------|-----------------------------|
| Zero-point correction=          | 0.282248 (Hartree/Particle) |
| Thermal correction to Energy=   | 0.305701                    |
| Thermal correction to Enthalpy= | 0.306645                    |

|                                              |                |             |             |
|----------------------------------------------|----------------|-------------|-------------|
| Thermal correction to Gibbs Free Energy=     | 0.226401       |             |             |
| Sum of electronic and zero-point Energies=   | -1536.577612   |             |             |
| Sum of electronic and thermal Energies=      | -1536.554160   |             |             |
| Sum of electronic and thermal Enthalpies=    | -1536.553216   |             |             |
| Sum of electronic and thermal Free Energies= | -1536.633459   |             |             |
| Single-point electronic energy (M06) =       | -1536.40995294 |             |             |
| C                                            | 0.79092700     | -1.19717400 | 0.00888100  |
| C                                            | -0.61009400    | -1.15847100 | -0.01160800 |
| C                                            | -0.60996400    | 1.15848100  | 0.01159500  |
| C                                            | 0.79106500     | 1.19705200  | -0.00881700 |
| C                                            | 1.51502500     | -0.00009900 | 0.00003800  |
| H                                            | 1.31616900     | -2.14509300 | 0.02037400  |
| H                                            | 1.31637800     | 2.14493200  | -0.02025500 |
| C                                            | 3.00079900     | -0.00022000 | 0.00005000  |
| C                                            | 3.70935600     | 0.93725400  | -0.76753400 |
| C                                            | 3.70930700     | -0.93769100 | 0.76755400  |
| C                                            | 5.09823700     | 0.91435500  | -0.75193800 |
| H                                            | 3.19903600     | 1.65841900  | -1.39579300 |
| C                                            | 5.09823600     | -0.91480400 | 0.75178600  |
| H                                            | 3.19911800     | -1.65889200 | 1.39588700  |
| C                                            | 5.82646400     | -0.00024700 | -0.00010800 |
| C                                            | -1.42785900    | 2.40319200  | 0.02837400  |
| C                                            | -0.89565600    | 3.62226900  | 0.47720000  |
| C                                            | -2.75942700    | 2.35402800  | -0.41085800 |
| C                                            | -1.69817000    | 4.75554400  | 0.46759600  |
| H                                            | 0.11395100     | 3.70568500  | 0.86168600  |
| C                                            | -3.51681700    | 3.51623400  | -0.40420900 |
| H                                            | -3.18998200    | 1.42134500  | -0.75241700 |
| C                                            | -3.01629400    | 4.73977200  | 0.02867000  |
| C                                            | -1.42814100    | -2.40308300 | -0.02834800 |
| C                                            | -2.75977500    | -2.35368500 | 0.41066400  |
| C                                            | -0.89604400    | -3.62228800 | -0.47695500 |
| C                                            | -3.51732700    | -3.51578500 | 0.40403100  |
| H                                            | -3.19025300    | -1.42090000 | 0.75204100  |
| C                                            | -1.69871500    | -4.75545000 | -0.46733400 |
| H                                            | 0.11360500     | -3.70589800 | -0.86128500 |
| C                                            | -3.01690400    | -4.73944600 | -0.02861500 |
| N                                            | -1.28676700    | 0.00004600  | -0.00001300 |
| H                                            | 6.90973200     | -0.00040500 | -0.00003100 |
| H                                            | -3.62644100    | -5.63497400 | -0.02847300 |
| H                                            | -3.62570600    | 5.63538500  | 0.02854100  |
| F                                            | -4.79145500    | 3.46455100  | -0.83710000 |
| F                                            | -1.18006800    | 5.91873900  | 0.90940100  |
| F                                            | -4.79202500    | -3.46387200 | 0.83671800  |
| F                                            | -1.18070900    | -5.91876700 | -0.90893200 |
| F                                            | 5.76893900     | 1.80913200  | -1.50093000 |
| F                                            | 5.76891700     | -1.80960100 | 1.50074500  |

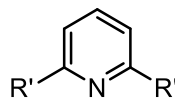

#### R'=H

|                                              |                             |
|----------------------------------------------|-----------------------------|
| Zero-point correction=                       | 0.089031 (Hartree/Particle) |
| Thermal correction to Energy=                | 0.093300                    |
| Thermal correction to Enthalpy=              | 0.094244                    |
| Thermal correction to Gibbs Free Energy=     | 0.061630                    |
| Sum of electronic and zero-point Energies=   | -248.195942                 |
| Sum of electronic and thermal Energies=      | -248.191673                 |
| Sum of electronic and thermal Enthalpies=    | -248.190729                 |
| Sum of electronic and thermal Free Energies= | -248.223343                 |
| Single-point electronic energy (M06) =       | -248.15741                  |

248.15741

|   |             |             |            |
|---|-------------|-------------|------------|
| C | -1.14254700 | -0.72168300 | 0.00009600 |
| C | 1.14209000  | -0.72239800 | 0.00010200 |
| C | -1.19846000 | 0.67342700  | 0.00003400 |
| C | 1.19887900  | 0.67272800  | 0.00002600 |

|   |             |             |             |
|---|-------------|-------------|-------------|
| C | 0.00043400  | 1.38561100  | -0.00019300 |
| H | -2.15737300 | 1.18342400  | 0.00027100  |
| H | 2.15812200  | 1.18208800  | 0.00023900  |
| N | -0.00043900 | -1.42100500 | -0.00024600 |
| H | -2.06044400 | -1.30796700 | 0.00035600  |
| H | 2.05966200  | -1.30920600 | 0.00039700  |
| H | 0.00073100  | 2.47257800  | 0.00006400  |

**R<sup>+</sup>=Me**

|                                              |                             |
|----------------------------------------------|-----------------------------|
| Zero-point correction=                       | 0.143931 (Hartree/Particle) |
| Thermal correction to Energy=                | 0.151865                    |
| Thermal correction to Enthalpy=              | 0.152809                    |
| Thermal correction to Gibbs Free Energy=     | 0.110133                    |
| Sum of electronic and zero-point Energies=   | -326.782652                 |
| Sum of electronic and thermal Energies=      | -326.774718                 |
| Sum of electronic and thermal Enthalpies=    | -326.773774                 |
| Sum of electronic and thermal Free Energies= | -326.816450                 |

Single-point electronic energy (M06) =

326.75408

|   |             |             |             |
|---|-------------|-------------|-------------|
| C | -1.15719800 | -0.26557900 | -0.00000100 |
| C | 1.15717700  | -0.26560400 | -0.00006600 |
| C | -1.19986800 | 1.13439200  | 0.00004700  |
| C | 1.19987600  | 1.13439500  | -0.00004700 |
| C | 0.00001500  | 1.84127700  | 0.00001400  |
| H | -2.15416700 | 1.65311400  | 0.00009500  |
| H | 2.15419600  | 1.65307600  | -0.00008400 |
| N | -0.00000400 | -0.94599700 | -0.00005700 |
| H | 0.00000000  | 2.92846100  | 0.00003100  |
| C | -2.41786000 | -1.09593900 | 0.00000200  |
| H | -2.44588600 | -1.74813000 | -0.88029500 |
| H | -2.44597700 | -1.74800400 | 0.88039100  |
| H | -3.31623100 | -0.47119300 | -0.00008300 |
| C | 2.41785700  | -1.09594500 | 0.00004600  |
| H | 2.44660500  | -1.74696800 | 0.88119900  |
| H | 2.44527800  | -1.74918100 | -0.87948500 |
| H | 3.31621200  | -0.47118200 | -0.00134600 |

**R<sup>+</sup>=Ph**

|                                              |                             |
|----------------------------------------------|-----------------------------|
| Zero-point correction=                       | 0.251122 (Hartree/Particle) |
| Thermal correction to Energy=                | 0.264555                    |
| Thermal correction to Enthalpy=              | 0.265499                    |
| Thermal correction to Gibbs Free Energy=     | 0.209552                    |
| Sum of electronic and zero-point Energies=   | -710.154467                 |
| Sum of electronic and thermal Energies=      | -710.141034                 |
| Sum of electronic and thermal Enthalpies=    | -710.140090                 |
| Sum of electronic and thermal Free Energies= | -710.196037                 |

Single-point electronic energy (M06) =

710.02588

|   |             |             |             |
|---|-------------|-------------|-------------|
| C | 1.20117700  | 2.25246500  | 0.03539700  |
| C | 1.16336700  | 0.84818700  | 0.01452400  |
| C | -1.16336700 | 0.84818700  | -0.01452500 |
| C | -1.20117700 | 2.25246500  | -0.03539700 |
| C | 0.00000000  | 2.95329700  | 0.00000000  |
| H | 2.14543200  | 2.78228400  | 0.09521800  |
| H | -2.14543300 | 2.78228400  | -0.09521800 |
| C | -2.40478500 | 0.02760600  | -0.03195600 |
| C | -3.63432900 | 0.53832100  | 0.41440400  |
| C | -2.36016700 | -1.29555200 | -0.50091700 |
| C | -4.78686200 | -0.24563200 | 0.38191200  |
| H | -3.69106400 | 1.54581200  | 0.81627700  |
| C | -3.51267600 | -2.07667000 | -0.53717500 |
| H | -1.40902300 | -1.69367500 | -0.83692100 |
| C | -4.73189300 | -1.55510800 | -0.09796600 |
| H | -5.72714700 | 0.16569300  | 0.73957500  |
| H | -3.46003000 | -3.09588200 | -0.91123200 |
| H | -5.63057700 | -2.16563700 | -0.12495700 |
| C | 2.40478600  | 0.02760600  | 0.03195500  |

|   |            |             |             |
|---|------------|-------------|-------------|
| C | 2.36016600 | -1.29555300 | 0.50091500  |
| C | 3.63433000 | 0.53832100  | -0.41440300 |
| C | 3.51267500 | -2.07667100 | 0.53717400  |
| H | 1.40902200 | -1.69367500 | 0.83691800  |
| C | 4.78686300 | -0.24563200 | -0.38190900 |
| H | 3.69106500 | 1.54581300  | -0.81627400 |
| C | 4.73189300 | -1.55510900 | 0.09796800  |
| H | 3.46002900 | -3.09588300 | 0.91123000  |
| H | 5.72714800 | 0.16569300  | -0.73957100 |
| H | 5.63057600 | -2.16563800 | 0.12495900  |
| N | 0.00000000 | 0.17706200  | -0.00000100 |
| H | 0.00000000 | 4.04020800  | 0.00000000  |

**R<sup>+</sup>=CF3**

|                                              |                             |
|----------------------------------------------|-----------------------------|
| Zero-point correction=                       | 0.098393 (Hartree/Particle) |
| Thermal correction to Energy=                | 0.109798                    |
| Thermal correction to Enthalpy=              | 0.110742                    |
| Thermal correction to Gibbs Free Energy=     | 0.057051                    |
| Sum of electronic and zero-point Energies=   | -922.255939                 |
| Sum of electronic and thermal Energies=      | -922.244534                 |
| Sum of electronic and thermal Enthalpies=    | -922.243590                 |
| Sum of electronic and thermal Free Energies= | -922.297281                 |

Single-point electronic energy (M06) =

922.22041

|   |             |             |             |
|---|-------------|-------------|-------------|
| C | -1.13937200 | 0.36533700  | 0.00007300  |
| C | 1.13936500  | 0.36530000  | -0.00030200 |
| C | -1.20120400 | 1.75977500  | 0.00017400  |
| C | 1.20125300  | 1.75977500  | -0.00021300 |
| C | 0.00004100  | 2.46599400  | 0.00000500  |
| H | -2.15779000 | 2.26795200  | 0.00035500  |
| H | 2.15787100  | 2.26789200  | -0.00034600 |
| N | 0.00000500  | -0.32672900 | -0.00015100 |
| H | 0.00002700  | 3.55185000  | 0.00007400  |
| C | -2.40050700 | -0.47964500 | 0.00005200  |
| C | 2.40049500  | -0.47968600 | 0.00000200  |
| F | -2.45739100 | -1.26948800 | -1.08668800 |
| F | -3.50741700 | 0.29855900  | 0.00042500  |
| F | -2.45712100 | -1.27026100 | 1.08611700  |
| F | 2.45620800  | -1.27190900 | -1.08498900 |
| F | 2.45827700  | -1.26787200 | 1.08784300  |
| F | 3.50738100  | 0.29856100  | -0.00245900 |

**R<sup>+</sup>=Cl**

|                                              |                             |
|----------------------------------------------|-----------------------------|
| Zero-point correction=                       | 0.069558 (Hartree/Particle) |
| Thermal correction to Energy=                | 0.076079                    |
| Thermal correction to Enthalpy=              | 0.077024                    |
| Thermal correction to Gibbs Free Energy=     | 0.037619                    |
| Sum of electronic and zero-point Energies=   | -1167.409711                |
| Sum of electronic and thermal Energies=      | -1167.403190                |
| Sum of electronic and thermal Enthalpies=    | -1167.402246                |
| Sum of electronic and thermal Free Energies= | -1167.441651                |

Single-point electronic energy (M06) =

1167.3518

|    |             |             |             |
|----|-------------|-------------|-------------|
| C  | -1.13015500 | 0.00428900  | 0.00059100  |
| C  | 1.13012700  | 0.00425100  | 0.00049600  |
| C  | -1.20613300 | 1.39778300  | 0.00025900  |
| C  | 1.20612300  | 1.39778800  | 0.00018000  |
| C  | 0.00001000  | 2.09656000  | -0.00061300 |
| H  | -2.16447100 | 1.90262000  | 0.00034200  |
| H  | 2.16450100  | 1.90254500  | 0.00020300  |
| N  | -0.00001400 | -0.68516700 | -0.00037500 |
| H  | -0.00001900 | 3.18282400  | -0.00048400 |
| Cl | -2.61901400 | -0.92929500 | -0.00010300 |
| Cl | 2.61902900  | -0.92928400 | -0.00006900 |

**R<sup>+</sup>=tBu**

|                        |                             |
|------------------------|-----------------------------|
| Zero-point correction= | 0.314735 (Hartree/Particle) |
|------------------------|-----------------------------|

Thermal correction to Energy= 0.330041  
 Thermal correction to Enthalpy= 0.330986  
 Thermal correction to Gibbs Free Energy= 0.273329  
 Sum of electronic and zero-point Energies= -562.490393  
 Sum of electronic and thermal Energies= -562.475086  
 Sum of electronic and thermal Enthalpies= -562.474142  
 Sum of electronic and thermal Free Energies= -562.531799  
 Single-point electronic energy (M06) =

562.50686

|   |             |             |             |
|---|-------------|-------------|-------------|
| C | -1.16641800 | 0.42507300  | 0.00002300  |
| C | 1.16641800  | 0.42507500  | -0.00001600 |
| C | -1.20346700 | 1.82590500  | 0.00001900  |
| C | 1.20346100  | 1.82591400  | -0.00001100 |
| C | -0.00000300 | 2.52602900  | 0.00000100  |
| H | -2.14492500 | 2.36213000  | 0.00003500  |
| H | 2.14492200  | 2.36213300  | -0.00002100 |
| N | 0.00000300  | -0.23906600 | 0.00000700  |
| H | -0.00001200 | 3.61341500  | -0.00000900 |
| C | -2.42719400 | -0.45546900 | 0.00000400  |
| C | 2.42719600  | -0.45546700 | 0.00000300  |
| C | -3.72354700 | 0.37372600  | 0.00001100  |
| H | -4.59030300 | -0.29669900 | -0.00003700 |
| H | -3.80174000 | 1.01159700  | 0.88837100  |
| H | -3.80169600 | 1.01167600  | -0.88829500 |
| C | -2.40312500 | -1.35043900 | -1.25989100 |
| H | -1.48813500 | -1.94794400 | -1.28988300 |
| H | -3.26486800 | -2.02900000 | -1.26157300 |
| H | -2.44610700 | -0.74623400 | -2.17415100 |
| C | -2.40312900 | -1.35049600 | 1.25984600  |
| H | -2.44613900 | -0.74634700 | 2.17414600  |
| H | -3.26485300 | -2.02908400 | 1.26149600  |
| H | -1.48812800 | -1.94798700 | 1.28983000  |
| C | 2.40309700  | -1.35051200 | -1.25983800 |
| H | 3.26481800  | -2.02910100 | -1.26148400 |
| H | 1.48808800  | -1.94799000 | -1.28979600 |
| H | 2.44609900  | -0.74636000 | -2.17413400 |
| C | 3.72356300  | 0.37371500  | -0.00005500 |
| H | 3.80174300  | 1.01168900  | 0.88823200  |
| H | 4.59031200  | -0.29672000 | -0.00000400 |
| H | 3.80175200  | 1.01155700  | -0.88843500 |
| C | 2.40314300  | -1.35041500 | 1.25990100  |
| H | 3.26484200  | -2.02903600 | 1.26155700  |
| H | 2.44622000  | -0.74620300 | 2.17415600  |
| H | 1.48811900  | -1.94786500 | 1.28997000  |

**iPr radical**  
 Zero-point correction= 0.088607 (Hartree/Particle)  
 Thermal correction to Energy= 0.093743  
 Thermal correction to Enthalpy= 0.094687  
 Thermal correction to Gibbs Free Energy= 0.061414  
 Sum of electronic and zero-point Energies= -118.389546  
 Sum of electronic and thermal Energies= -118.384410  
 Sum of electronic and thermal Enthalpies= -118.383466  
 Sum of electronic and thermal Free Energies= -118.416739  
 Single-point electronic energy (M06, dioxane) = -118.40388  
 (M06, DMF) = -118.4047906

|   |             |             |             |
|---|-------------|-------------|-------------|
| C | 0.00000000  | 0.53171400  | -0.05308700 |
| H | 0.00000000  | 1.60552600  | 0.12080200  |
| C | -1.30116800 | -0.19768700 | 0.00372000  |
| H | -1.52795400 | -0.57058200 | 1.02006600  |
| H | -2.14157400 | 0.44011800  | -0.29321000 |
| H | -1.29744500 | -1.08132300 | -0.65031200 |
| C | 1.30116800  | -0.19768700 | 0.00372000  |
| H | 1.29744600  | -1.08132000 | -0.65031600 |
| H | 2.14157500  | 0.44011900  | -0.29320600 |
| H | 1.52795200  | -0.57058600 | 1.02006500  |

**Cy radical**  
 Zero-point correction= 0.156344 (Hartree/Particle)  
 Thermal correction to Energy= 0.162374  
 Thermal correction to Enthalpy= 0.163318  
 Thermal correction to Gibbs Free Energy= 0.126621  
 Sum of electronic and zero-point Energies= -235.057573  
 Sum of electronic and thermal Energies= -235.051542  
 Sum of electronic and thermal Enthalpies= -235.050598  
 Sum of electronic and thermal Free Energies= -235.087295  
 Single-point electronic energy (M06) = -235.08084

|   |             |             |             |
|---|-------------|-------------|-------------|
| C | -0.00001400 | 1.46430000  | -0.16685600 |
| C | 1.29089700  | 0.77842400  | 0.15640000  |
| C | -1.29091300 | 0.77840200  | 0.15639900  |
| H | -0.00002200 | 2.53025400  | -0.38200200 |
| C | 1.26829900  | -0.71304900 | -0.24239900 |
| H | 1.48483400  | 0.83687900  | 1.24649500  |
| H | 2.13564500  | 1.29023600  | -0.32199100 |
| C | -1.26828500 | -0.71307200 | -0.24239700 |
| H | -1.48485400 | 0.83685500  | 1.24649300  |
| H | -2.13566900 | 1.29019700  | -0.32199500 |
| C | 0.00001300  | -1.41137800 | 0.27081800  |
| H | 2.16541800  | -1.21644500 | 0.13990200  |
| H | 1.30183300  | -0.79145900 | -1.33804600 |
| H | -2.16539400 | -1.21648400 | 0.13990500  |
| H | -1.30182000 | -0.79148200 | -1.33804400 |
| H | 0.00002400  | -2.46586000 | -0.03408200 |
| H | 0.00001500  | -1.40445000 | 1.37157200  |

## Relative Contributions of Sterics and Electronics (Eq 3)

Parameters were normalized using average values of each range and standard deviation as:

$$p_{i\text{ norm}} = \frac{(p_i - \bar{p})}{\sigma}$$

Bilinear regression analysis performed with normalized parameters in MS Excel returned the following:

| Bilinear fit with normalized parameters |                |          |          |            |                       |          |
|-----------------------------------------|----------------|----------|----------|------------|-----------------------|----------|
|                                         | $\sigma$       | $\nu$    |          | Prediction |                       |          |
| H                                       | -0.25556       | -1.65933 | 1.2      | 1.265348   | SUMMARY OUTPUT        |          |
| Me                                      | -0.92394       | -0.29334 | -11.4    | -9.69852   |                       |          |
| Ph                                      | -0.29487       | -0.16199 | -5.1     | -8.92137   | Regression Statistics |          |
| CF <sub>3</sub>                         | 1.867538       | 0.731156 | -9       | -9.22395   | Multiple R 0.966491   |          |
| Cl                                      | 0.648724       | -0.21453 | -8       | -6.07518   | R Square 0.934105     |          |
| tBu                                     | -1.04189       | 1.598036 | -23.1    | -22.7463   | Adjusted R 0.890176   |          |
|                                         |                |          |          |            | Standard E 2.66973    |          |
|                                         |                |          |          |            | Observatic 6          |          |
| ANOVA                                   |                |          |          |            |                       |          |
|                                         | df             | SS       | MS       | F          | Significance F        |          |
| Regression                              | 2              | 303.111  | 151.5555 | 21.2636    | 0.016915              |          |
| Residual                                | 3              | 21.38238 | 7.12746  |            |                       |          |
| Total                                   | 5              | 324.4933 |          |            |                       |          |
| Coefficients                            |                |          |          |            |                       |          |
|                                         | Standard Error | t Stat   | P-value  | Lower 95%  | Upper 95%             |          |
| Intercept                               | -9.23333       | 1.089913 | -8.47163 | 0.003453   | -12.7019              | -5.76474 |
| X Variable                              | 2.641386       | 1.091316 | 2.420367 | 0.094138   | -0.83167              | 6.11444  |
| X Variable                              | -6.73386       | 1.091316 | -6.17041 | 0.008569   | -10.2069              | -3.26081 |

Coefficients for Hammett (2.64) and Charton (-6.73) parameters indicate that ~25% of variance in the thermodynamics of dissociation can be ascribed to the electronic factors, while rest of the energetics results from sterics.

## References

- Pangborn, A. B.; Giardello, M. A.; Grubbs, R. H.; Rosen, R. K.; Timmers, F. J., Safe and Convenient Procedure for Solvent Purification. *Organometallics* **1996**, *15* (5), 1518-1520. 10.1021/om9503712.
- (a) Basch, C. H.; Liao, J.; Xu, J.; Piane, J. J.; Watson, M. P., Harnessing Alkyl Amines as Electrophiles for Nickel-Catalyzed Cross Couplings via C–N Bond Activation. *J. Am. Chem. Soc.* **2017**, *139* (15), 5313-5316. 10.1021/jacs.7b02389; (b) Liao, J.; Basch, C. H.; Hoerner, M. E.; Talley, M. R.; Boscoe, B. P.; Tucker, J. W.; Garnsey, M. R.; Watson, M. P., Deaminative Reductive Cross-Electrophile Couplings of Alkylpyridinium Salts and Aryl Bromides. *Org. Lett.* **2019**, *21* (8), 2941-2946. 10.1021/acs.orglett.9b01014.
- Mouradzadegan, A.; Abadast, F., An improved organic/inorganic solid receptor for colorimetric cyanide-chemosensing in water: towards new mechanism aspects, simplistic use and portability. *Chem. Commun.* **2014**, *50* (100), 15983-15986. 10.1039/C4CC06756H.
- Messina, M. S.; Axtell, J. C.; Wang, Y.; Chong, P.; Wixtrom, A. I.; Kirlikovali, K. O.; Upton, B. M.; Hunter, B. M.; Shafaat, O. S.; Khan, S. I.; Winkler, J. R.; Gray, H. B.; Alexandrova, A. N.; Maynard, H. D.; Spokoyny, A. M., Visible-Light-Induced Olefin Activation Using 3D Aromatic Boron-Rich Cluster Photooxidants. *J. Am. Chem. Soc.* **2016**, *138* (22), 6952-6955. 10.1021/jacs.6b03568.
- Liao, J.; Guan, W.; Boscoe, B. P.; Tucker, J. W.; Tomlin, J. W.; Garnsey, M. R.; Watson, M. P., Transforming Benzylic Amines into Diarylmethanes: Cross-Couplings of Benzylic Pyridinium Salts via C–N Bond Activation. *Org. Lett.* **2018**, *20* (10), 3030-3033. 10.1021/acs.orglett.8b01062.
- Michels, T. D.; Rhee, J. U.; Vanderwal, C. D., Synthesis of  $\delta$ -Tributylstannyl- $\alpha,\beta,\gamma,\delta$ -Unsaturated Aldehydes from Pyridines. *Org. Lett.* **2008**, *10* (21), 4787-4790. 10.1021/ol8020435.
- Kuttab, S.; Shang, J.; Castagnoli, N., Rat liver microsomal enzyme catalyzed oxidation of 4-phenyl-trans-1-(2-phenylcyclopropyl)-1,2,3,6-tetrahydropyridine. *Bioorg. Med. Chem.* **2001**, *9* (7), 1685-1689. [https://doi.org/10.1016/S0968-0896\(01\)00091-8](https://doi.org/10.1016/S0968-0896(01)00091-8).

8. *Apex3*, Bruker AXS, Inc.: Madison, WI, 2015.
9. Sheldrick, G., SHELXT - Integrated space-group and crystal-structure determination. *Acta Crystallographica Section A* **2015**, *71* (1), 3-8. doi:10.1107/S2053273314026370.
10. Sheldrick, G., Crystal structure refinement with SHELXL. *Acta Crystallographica Section C* **2015**, *71* (1), 3-8. doi:10.1107/S2053229614024218.
11. Frisch, M. J.; Trucks, G. W.; Schlegel, H. B.; Scuseria, G. E.; Robb, M. A.; Cheeseman, J. R.; Scalmani, G.; Barone, V.; Mennucci, B.; Petersson, G. A.; Nakatsuji, H.; Caricato, M.; Li, X.; Hratchian, H. P.; Izmaylov, A. F.; Bloino, J.; Zheng, G.; Sonnenberg, J. L.; Hada, M.; Ehara, M.; Toyota, K.; Fukuda, R.; Hasegawa, J.; Ishida, M.; Nakajima, T.; Honda, Y.; Kitao, O.; Nakai, H.; Vreven, T.; J. A. Montgomery, J.; Peralta, J. E.; Ogliaro, F.; Bearpark, M.; Heyd, J. J.; Brothers, E.; Kudin, K. N.; Staroverov, V. N.; Kobayashi, R.; Normand, J.; Raghavachari, K.; Rendell, A.; Burant, J. C.; Iyengar, S. S.; Tomasi, J.; Cossi, M.; Rega, N.; Millam, J. M.; Klene, M.; Knox, J. E.; Cross, J. B.; Bakken, V.; Adamo, C.; Jaramillo, J.; Gomperts, R.; Stratmann, R. E.; Yazyev, O.; Austin, A. J.; Cammi, R.; Pomelli, C.; Ochterski, J. W.; Martin, R. L.; Morokuma, K.; Zakrzewski, V. G.; Voth, G. A.; Salvador, P.; Dannenberg, J. J.; Dapprich, S.; Daniels, A. D.; Farkas, Ö.; Foresman, J. B.; Ortiz, J. V.; Cioslowski, J.; Fox, D. J. *Gaussian 09, Revision D.01*, Gaussian, Inc.: Wallingford, CT, 2009.
12. (a) Becke, A. D., A new mixing of Hartree–Fock and local density-functional theories. *The Journal of Chemical Physics* **1993**, *98* (2), 1372-1377. 10.1063/1.464304; (b) Lee, C.; Yang, W.; Parr, R. G., Development of the Colle-Salvetti correlation-energy formula into a functional of the electron density. *Physical Review B* **1988**, *37* (2), 785-789. 10.1103/PhysRevB.37.785.
13. Marenich, A. V.; Cramer, C. J.; Truhlar, D. G., Universal Solvation Model Based on Solute Electron Density and on a Continuum Model of the Solvent Defined by the Bulk Dielectric Constant and Atomic Surface Tensions. *The Journal of Physical Chemistry B* **2009**, *113* (18), 6378-6396. 10.1021/jp810292n.
14. Zhao, Y.; Truhlar, D. G., The M06 suite of density functionals for main group thermochemistry, thermochemical kinetics, noncovalent interactions, excited states, and transition elements: two new functionals and systematic testing of four M06-class functionals and 12 other functionals. *Theor. Chem. Acc.* **2008**, *120* (1), 215-241. 10.1007/s00214-007-0310-x.
15. (a) Paton, R. S.; Kim, S.; Ross, A. G.; Danishefsky, S. J.; Houk, K. N., Experimental Diels–Alder Reactivities of Cycloalkenones and Cyclic Dienes Explained through Transition-State Distortion Energies. *Angew. Chem., Int. Ed.* **2011**, *50* (44), 10366-10368. <https://doi.org/10.1002/anie.201103998>; (b) Pham, H. V.; Paton, R. S.; Ross, A. G.; Danishefsky, S. J.; Houk, K. N., Intramolecular Diels–Alder Reactions of Cycloalkenones: Stereoselectivity, Lewis Acid Acceleration, and Halogen Substituent Effects. *J. Am. Chem. Soc.* **2014**, *136* (6), 2397-2403. 10.1021/ja410220w; (c) Yang, Y.-F.; Hong, X.; Yu, J.-Q.; Houk, K. N., Experimental–Computational Synergy for Selective Pd(II)-Catalyzed C–H Activation of Aryl and Alkyl Groups. *Acc. Chem. Res.* **2017**, *50* (11), 2853-2860. 10.1021/acs.accounts.7b00440.
16. (a) Mok, D. K. W.; Neumann, R.; Handy, N. C., Dynamical and Nondynamical Correlation. *The Journal of Physical Chemistry* **1996**, *100* (15), 6225-6230. 10.1021/jp9528020; (b) Lee, T. J.; Taylor, P. R., A diagnostic for determining the quality of single-reference electron correlation methods. *Int. J. Quantum Chem.* **1989**, *36* (S23), 199-207. <https://doi.org/10.1002/qua.560360824>; (c) Yang, Z.; Lin, X.; Zhou, J.; Hu, M.; Gai, Y.; Zhao, W.; Long, B.; Zhang, W., Computational study on the mechanism and kinetics for the reaction between HO<sub>2</sub> and n-propyl peroxy radical. *RSC Advances* **2019**, *9* (69), 40437-40444. 10.1039/C9RA07503H.

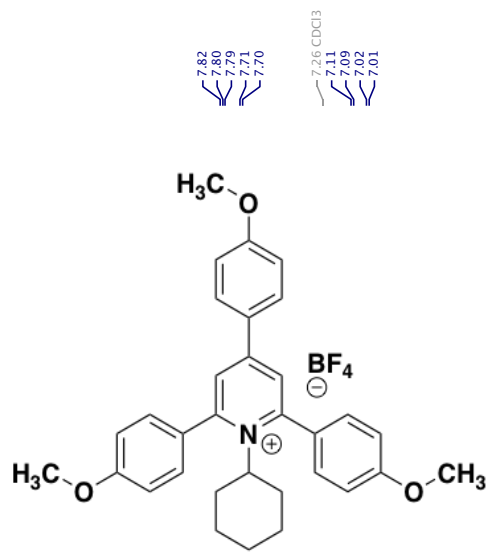

Compound 1a-Cy  
<sup>1</sup>H NMR (600 MHz, CDCl<sub>3</sub>)

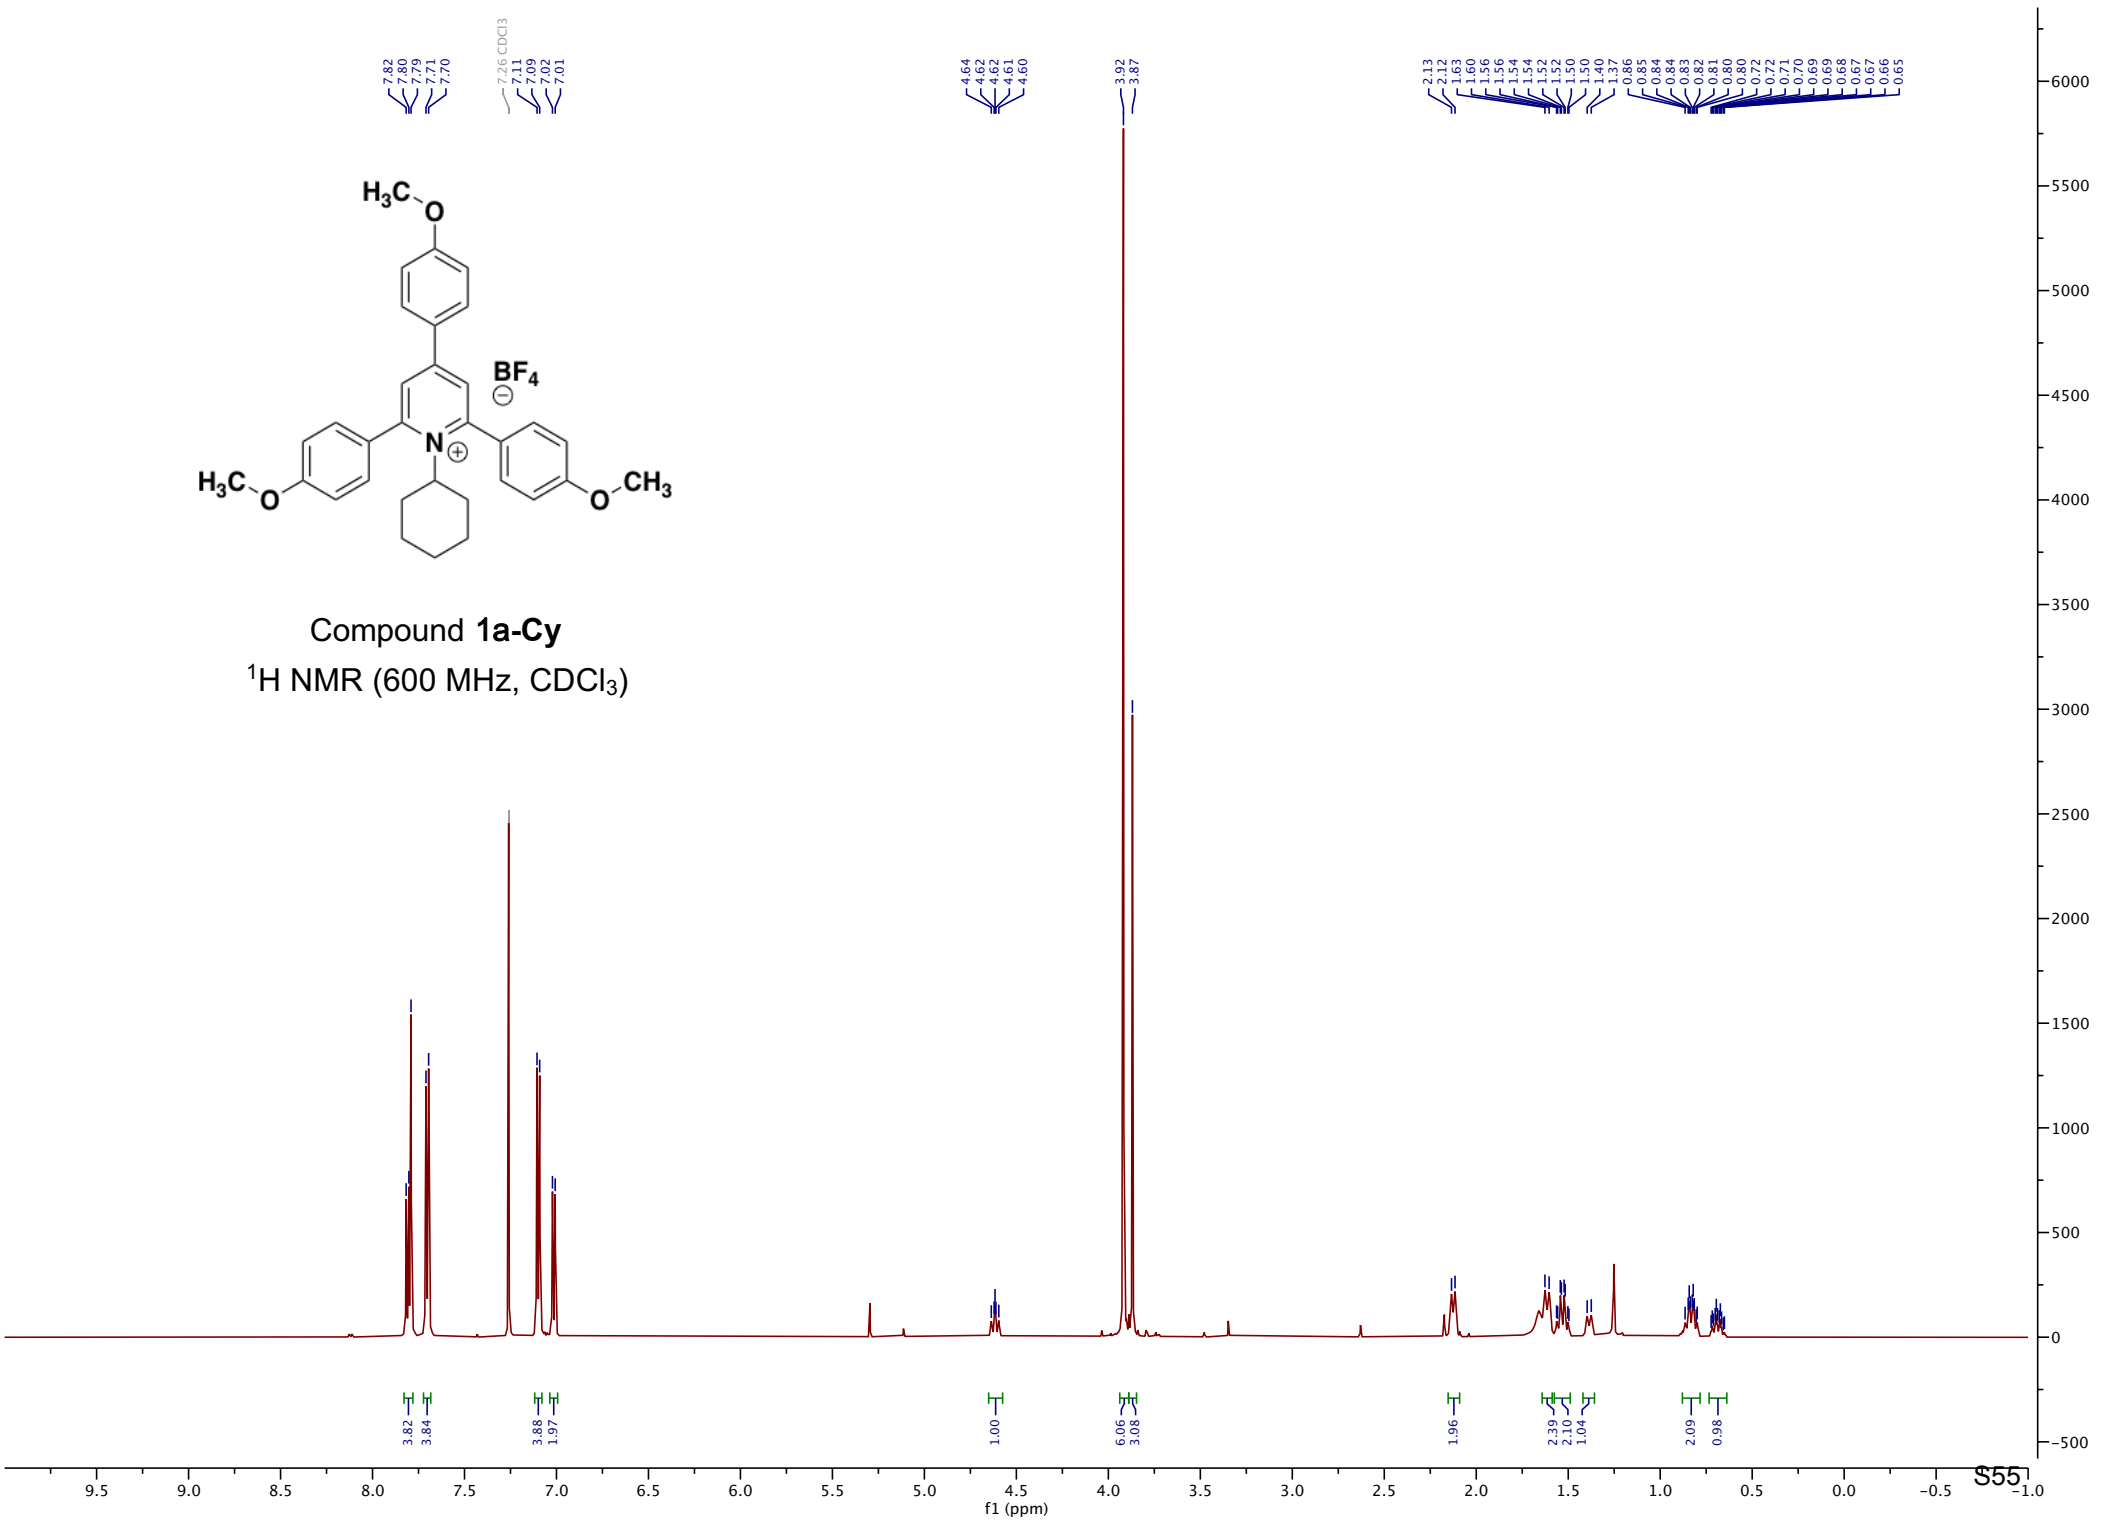

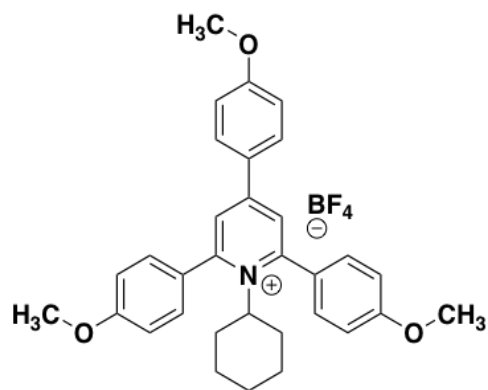

Compound 1a-Cy  
<sup>13</sup>C NMR (151 MHz, CDCl<sub>3</sub>)

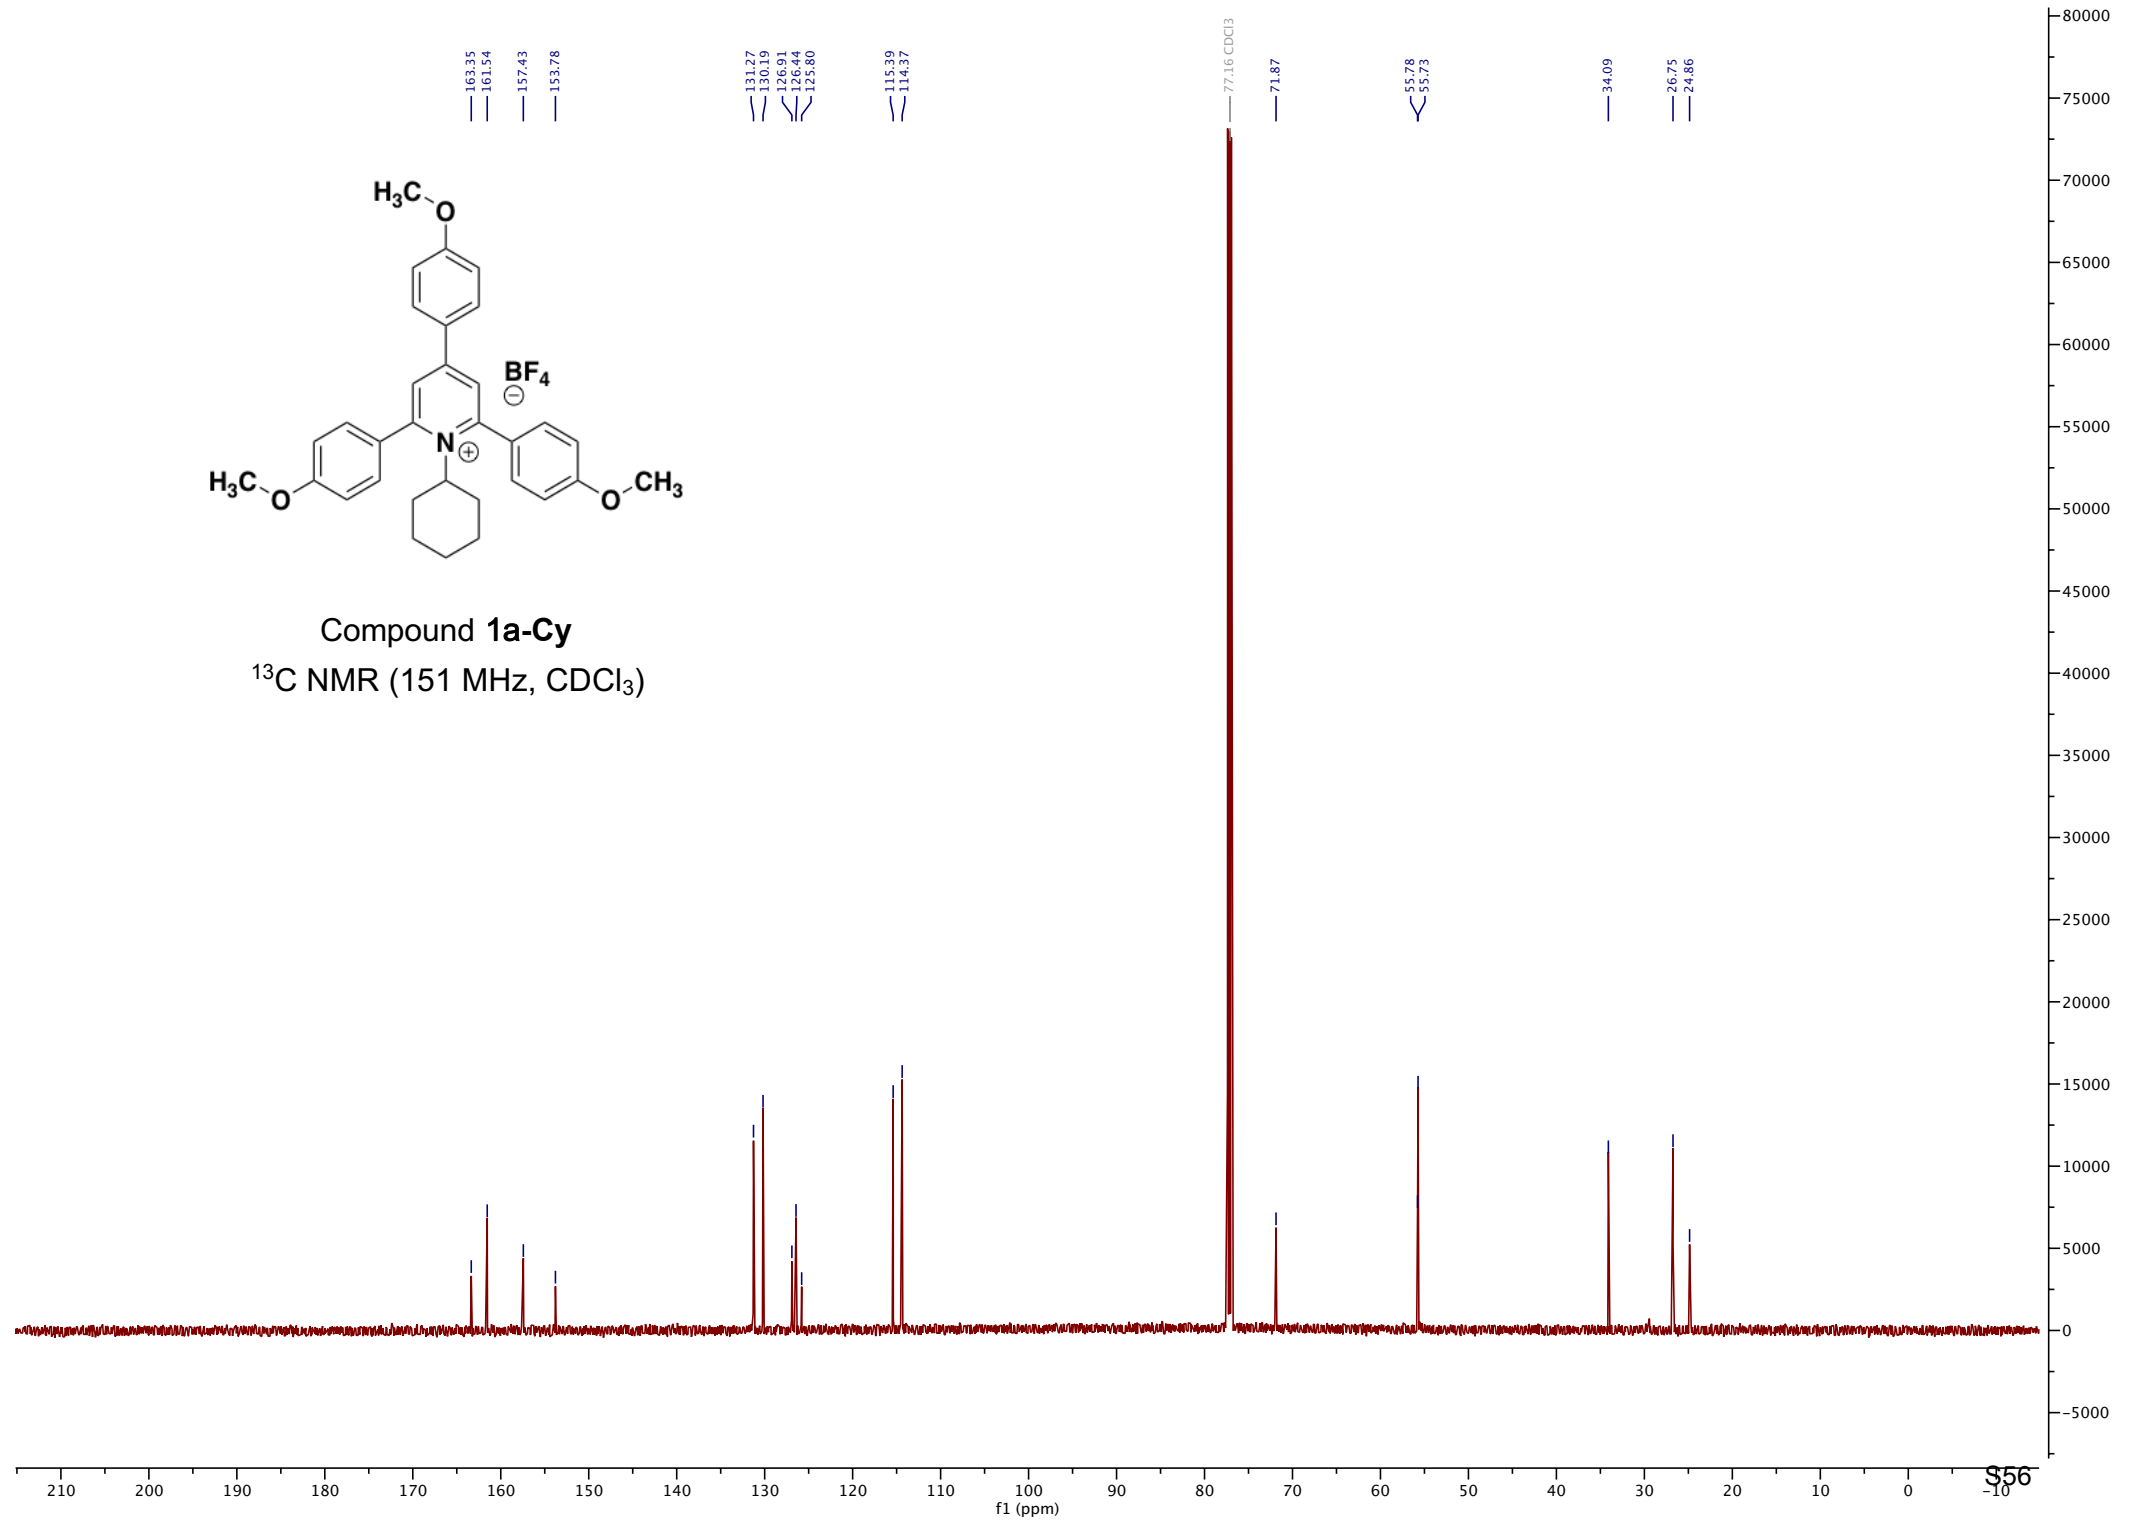





Compound 1a-Cy  
<sup>19</sup>F NMR (376 MHz, CDCl<sub>3</sub>)

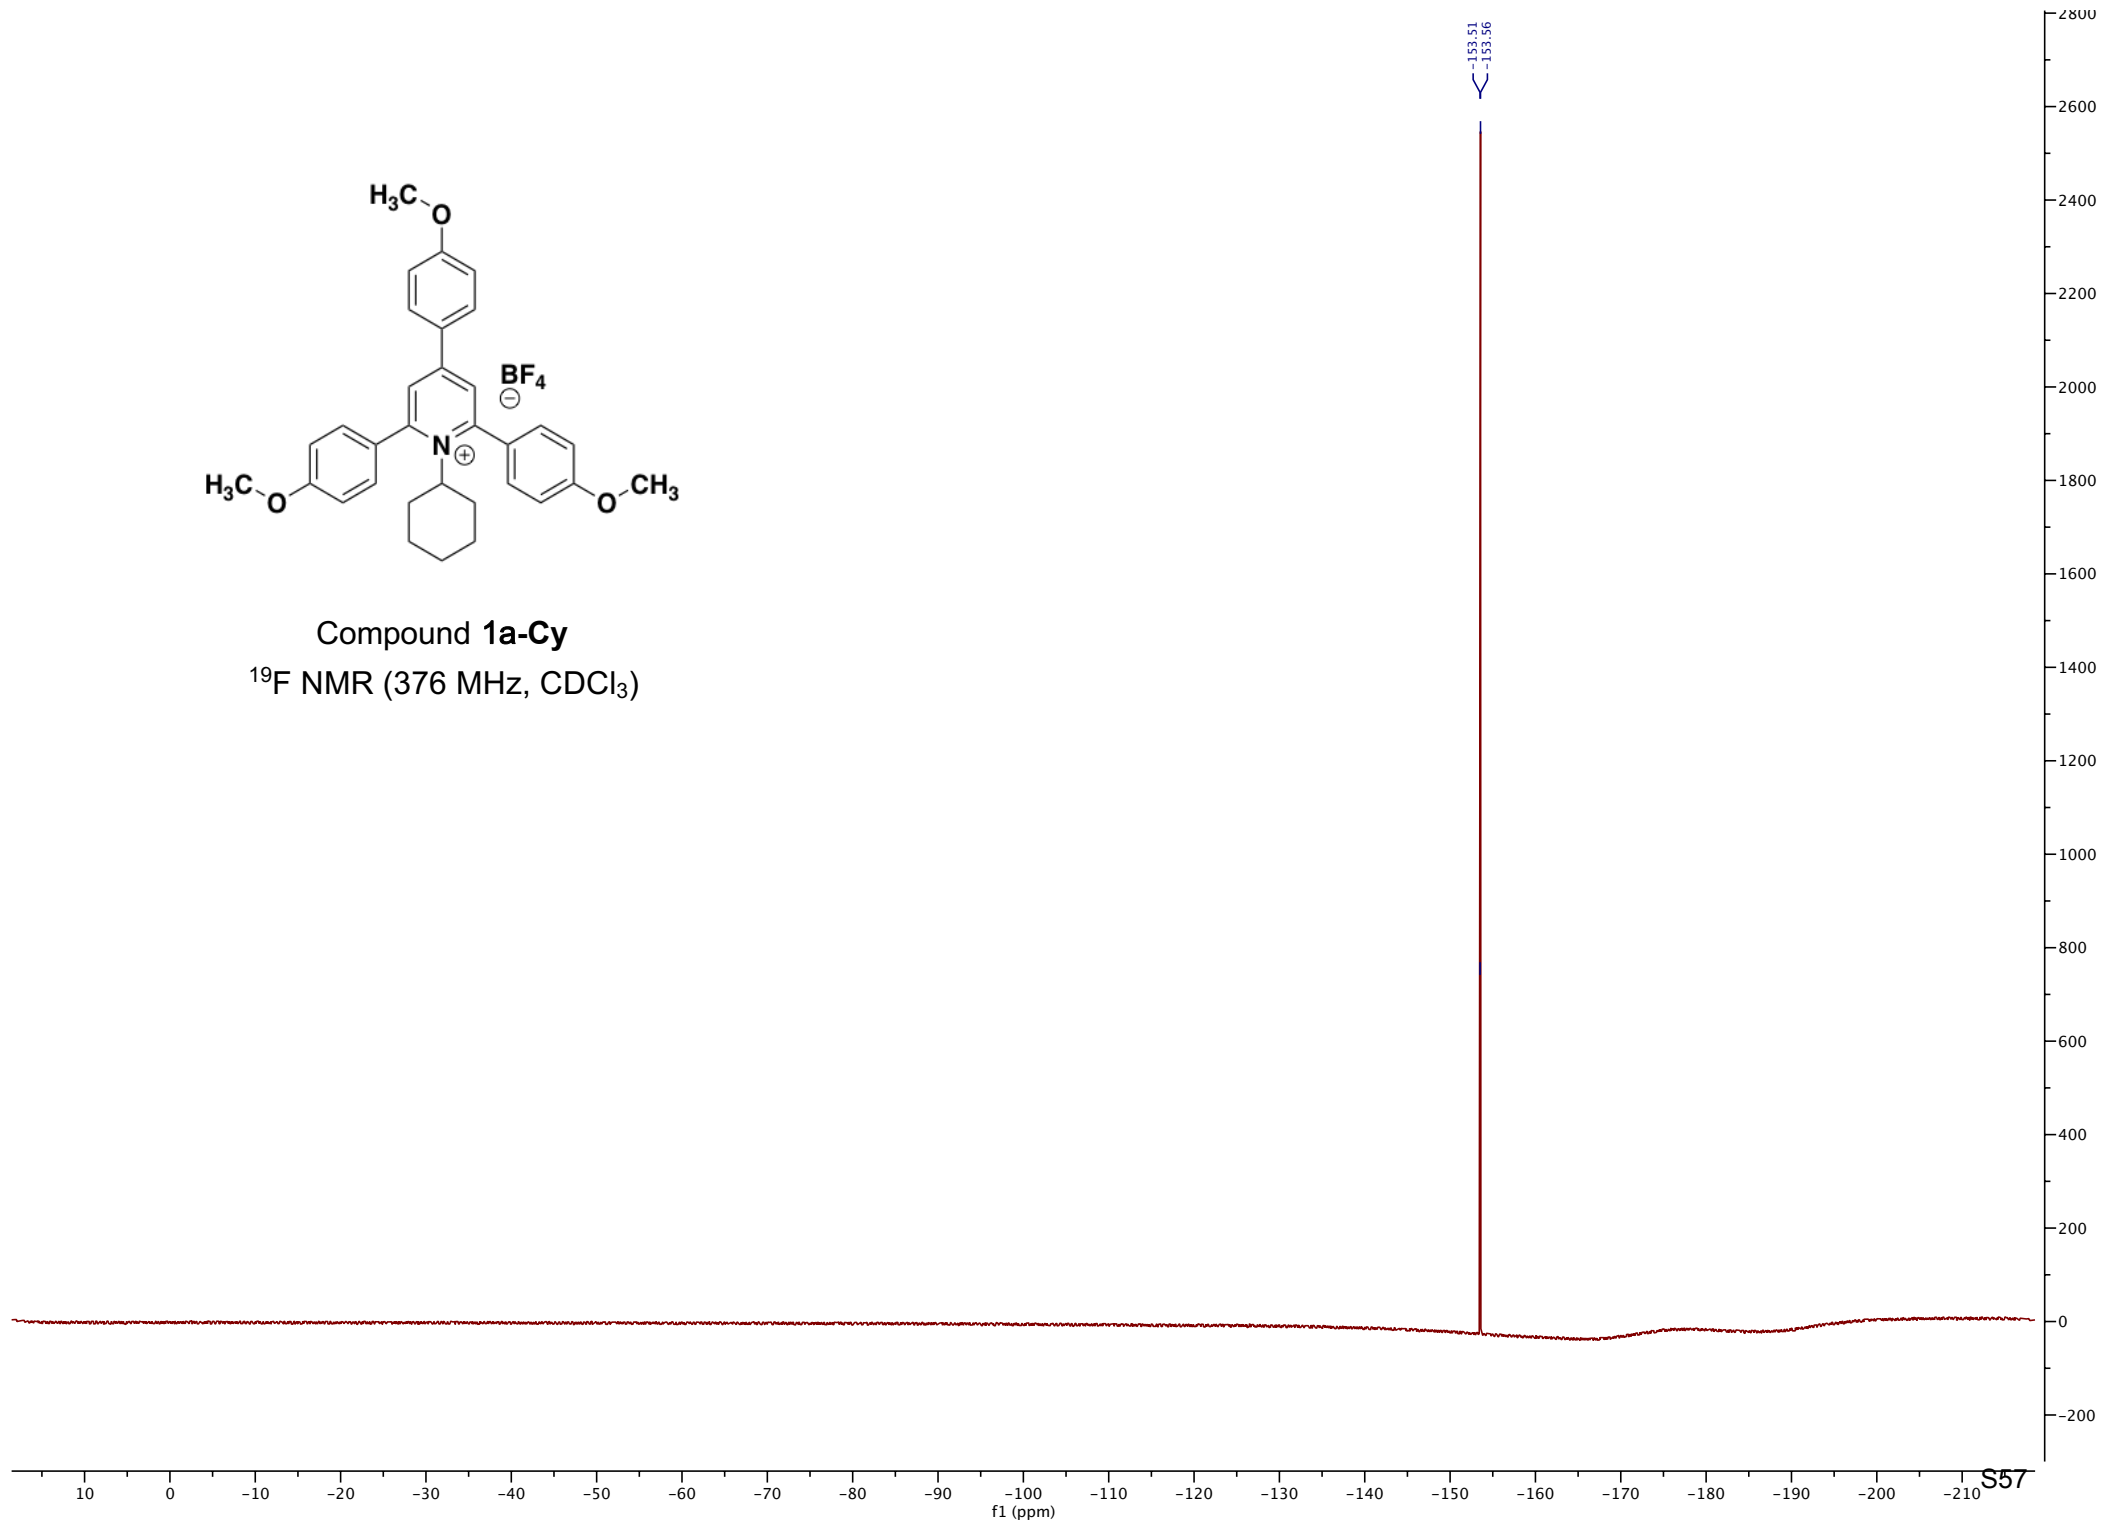

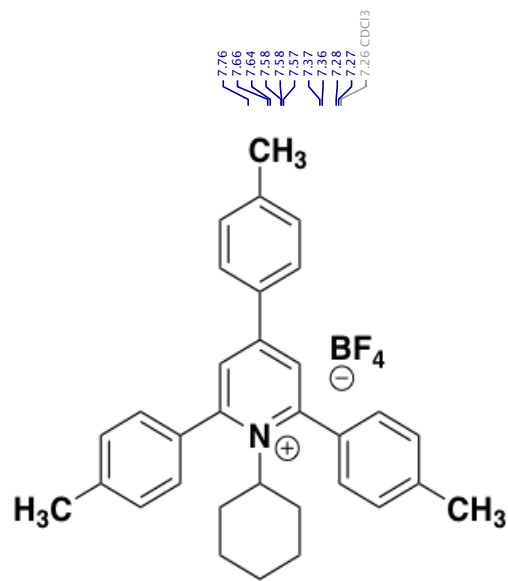

Compound 1b-Cy  
 $^1\text{H}$  NMR (600 MHz,  $\text{CDCl}_3$ )

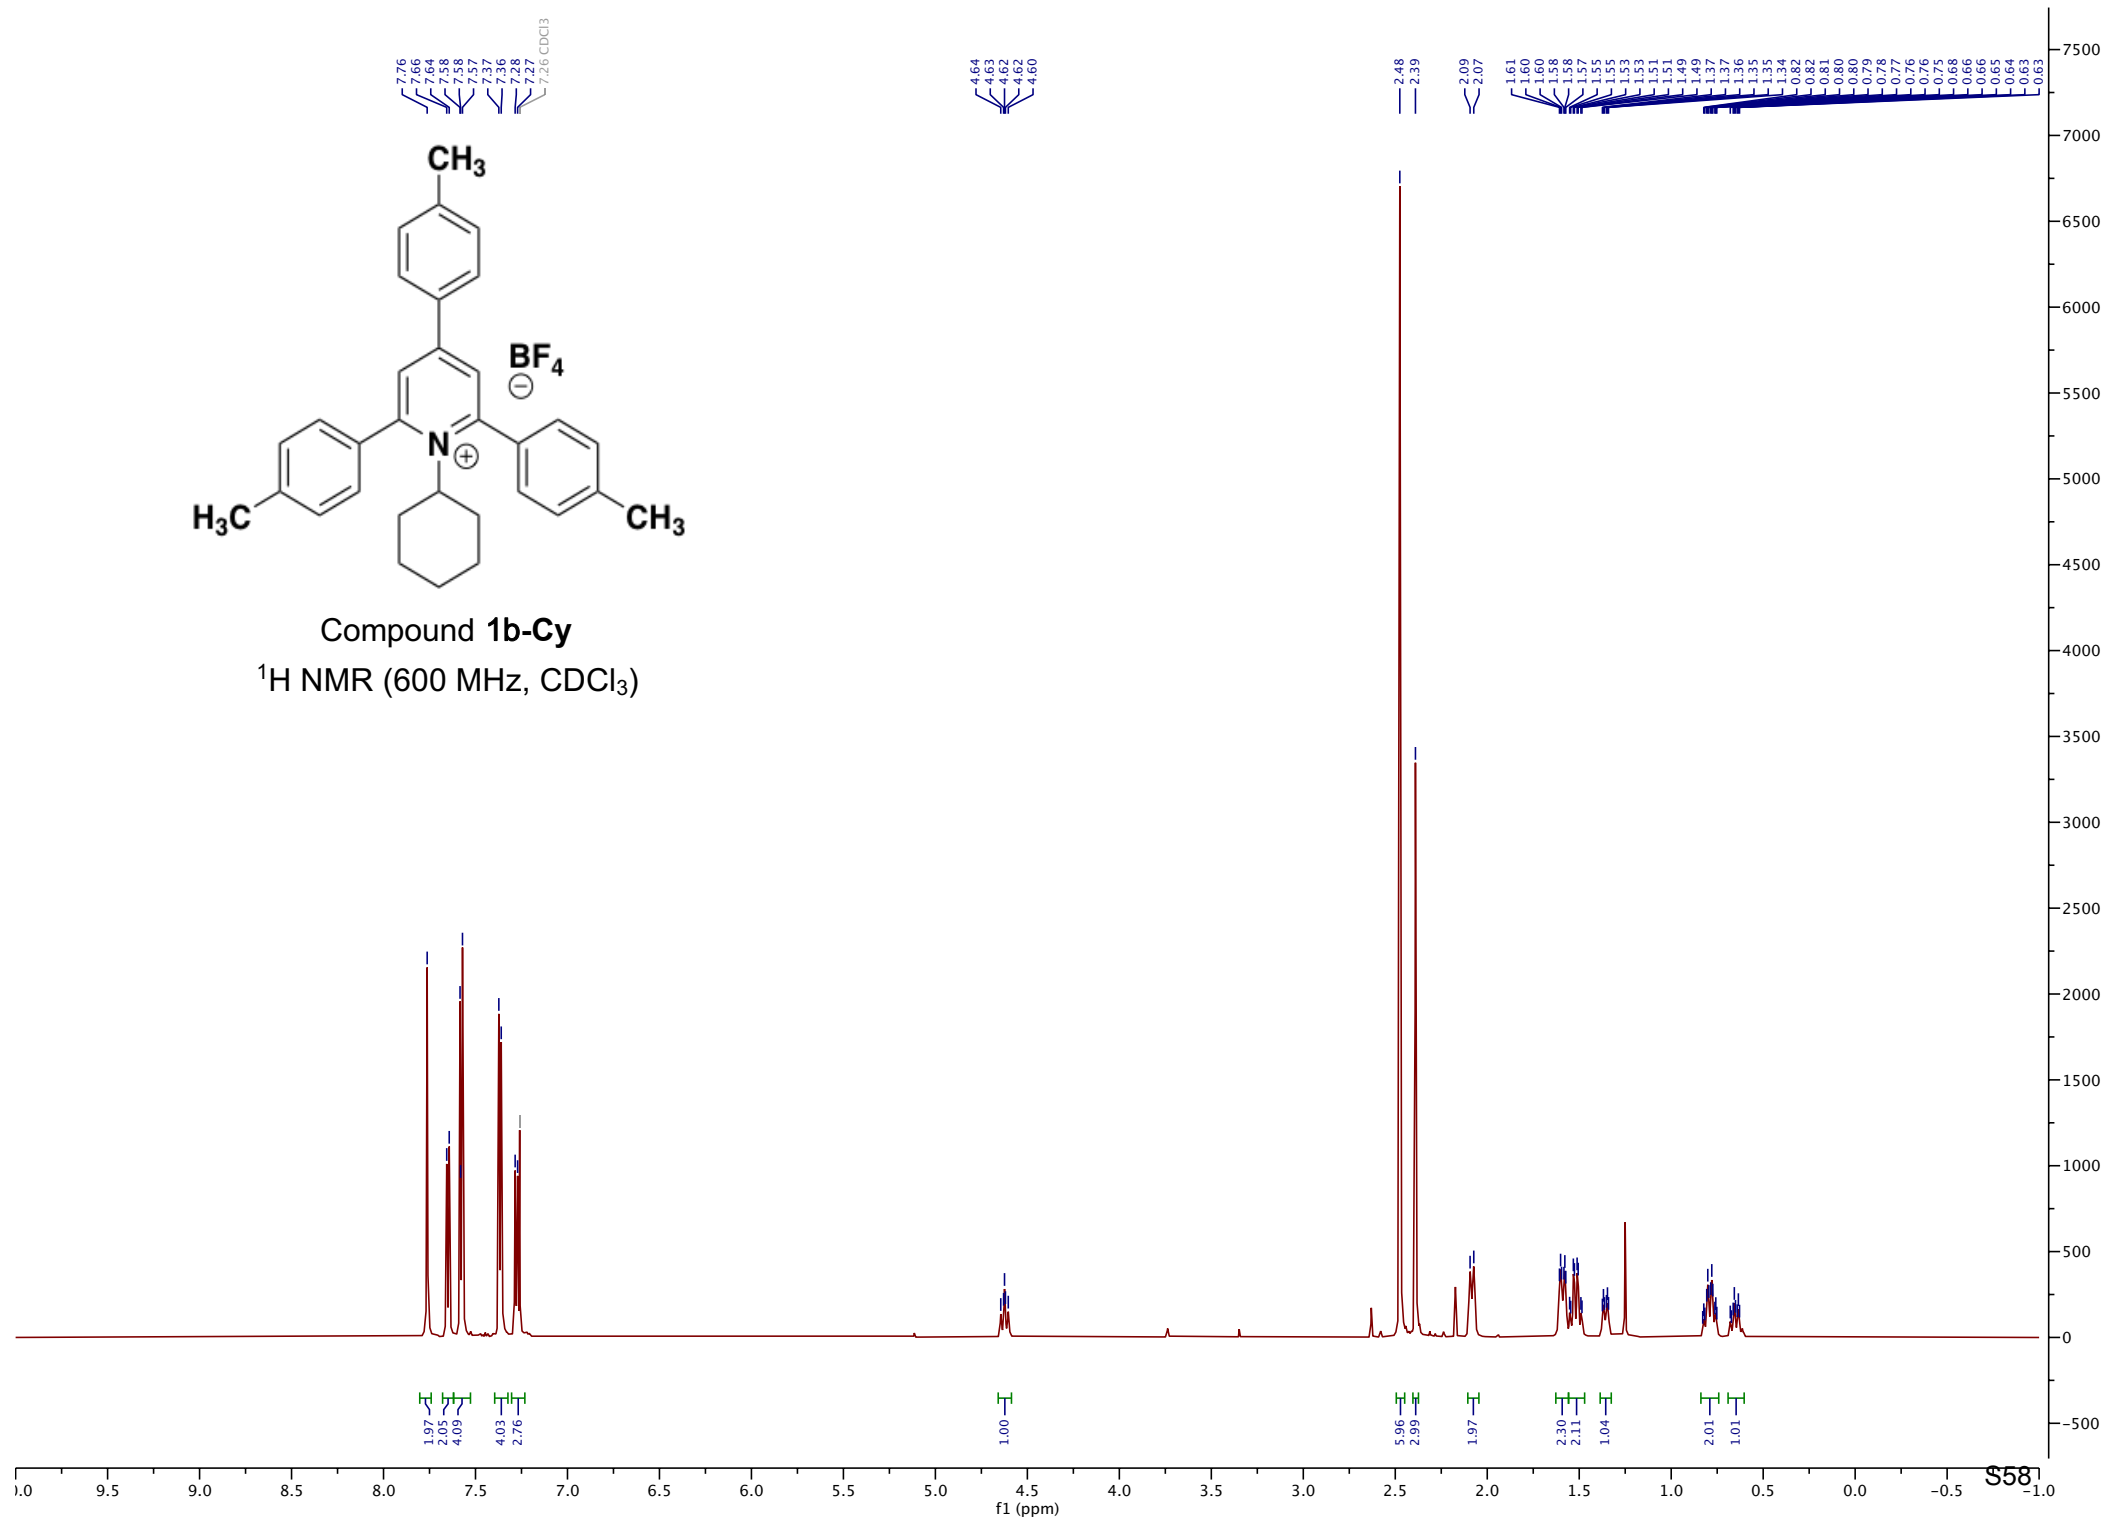

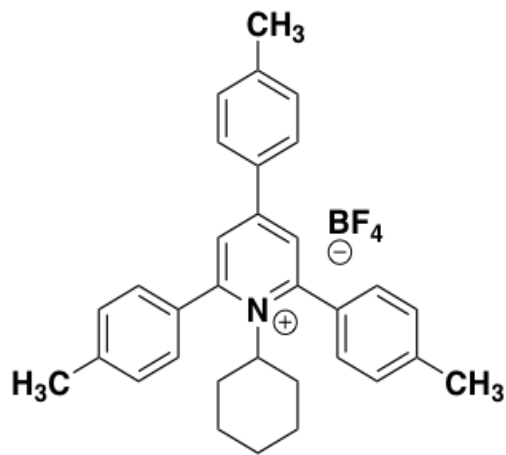

Compound 1b-Cy  
<sup>13</sup>C NMR (151 MHz, CDCl<sub>3</sub>)

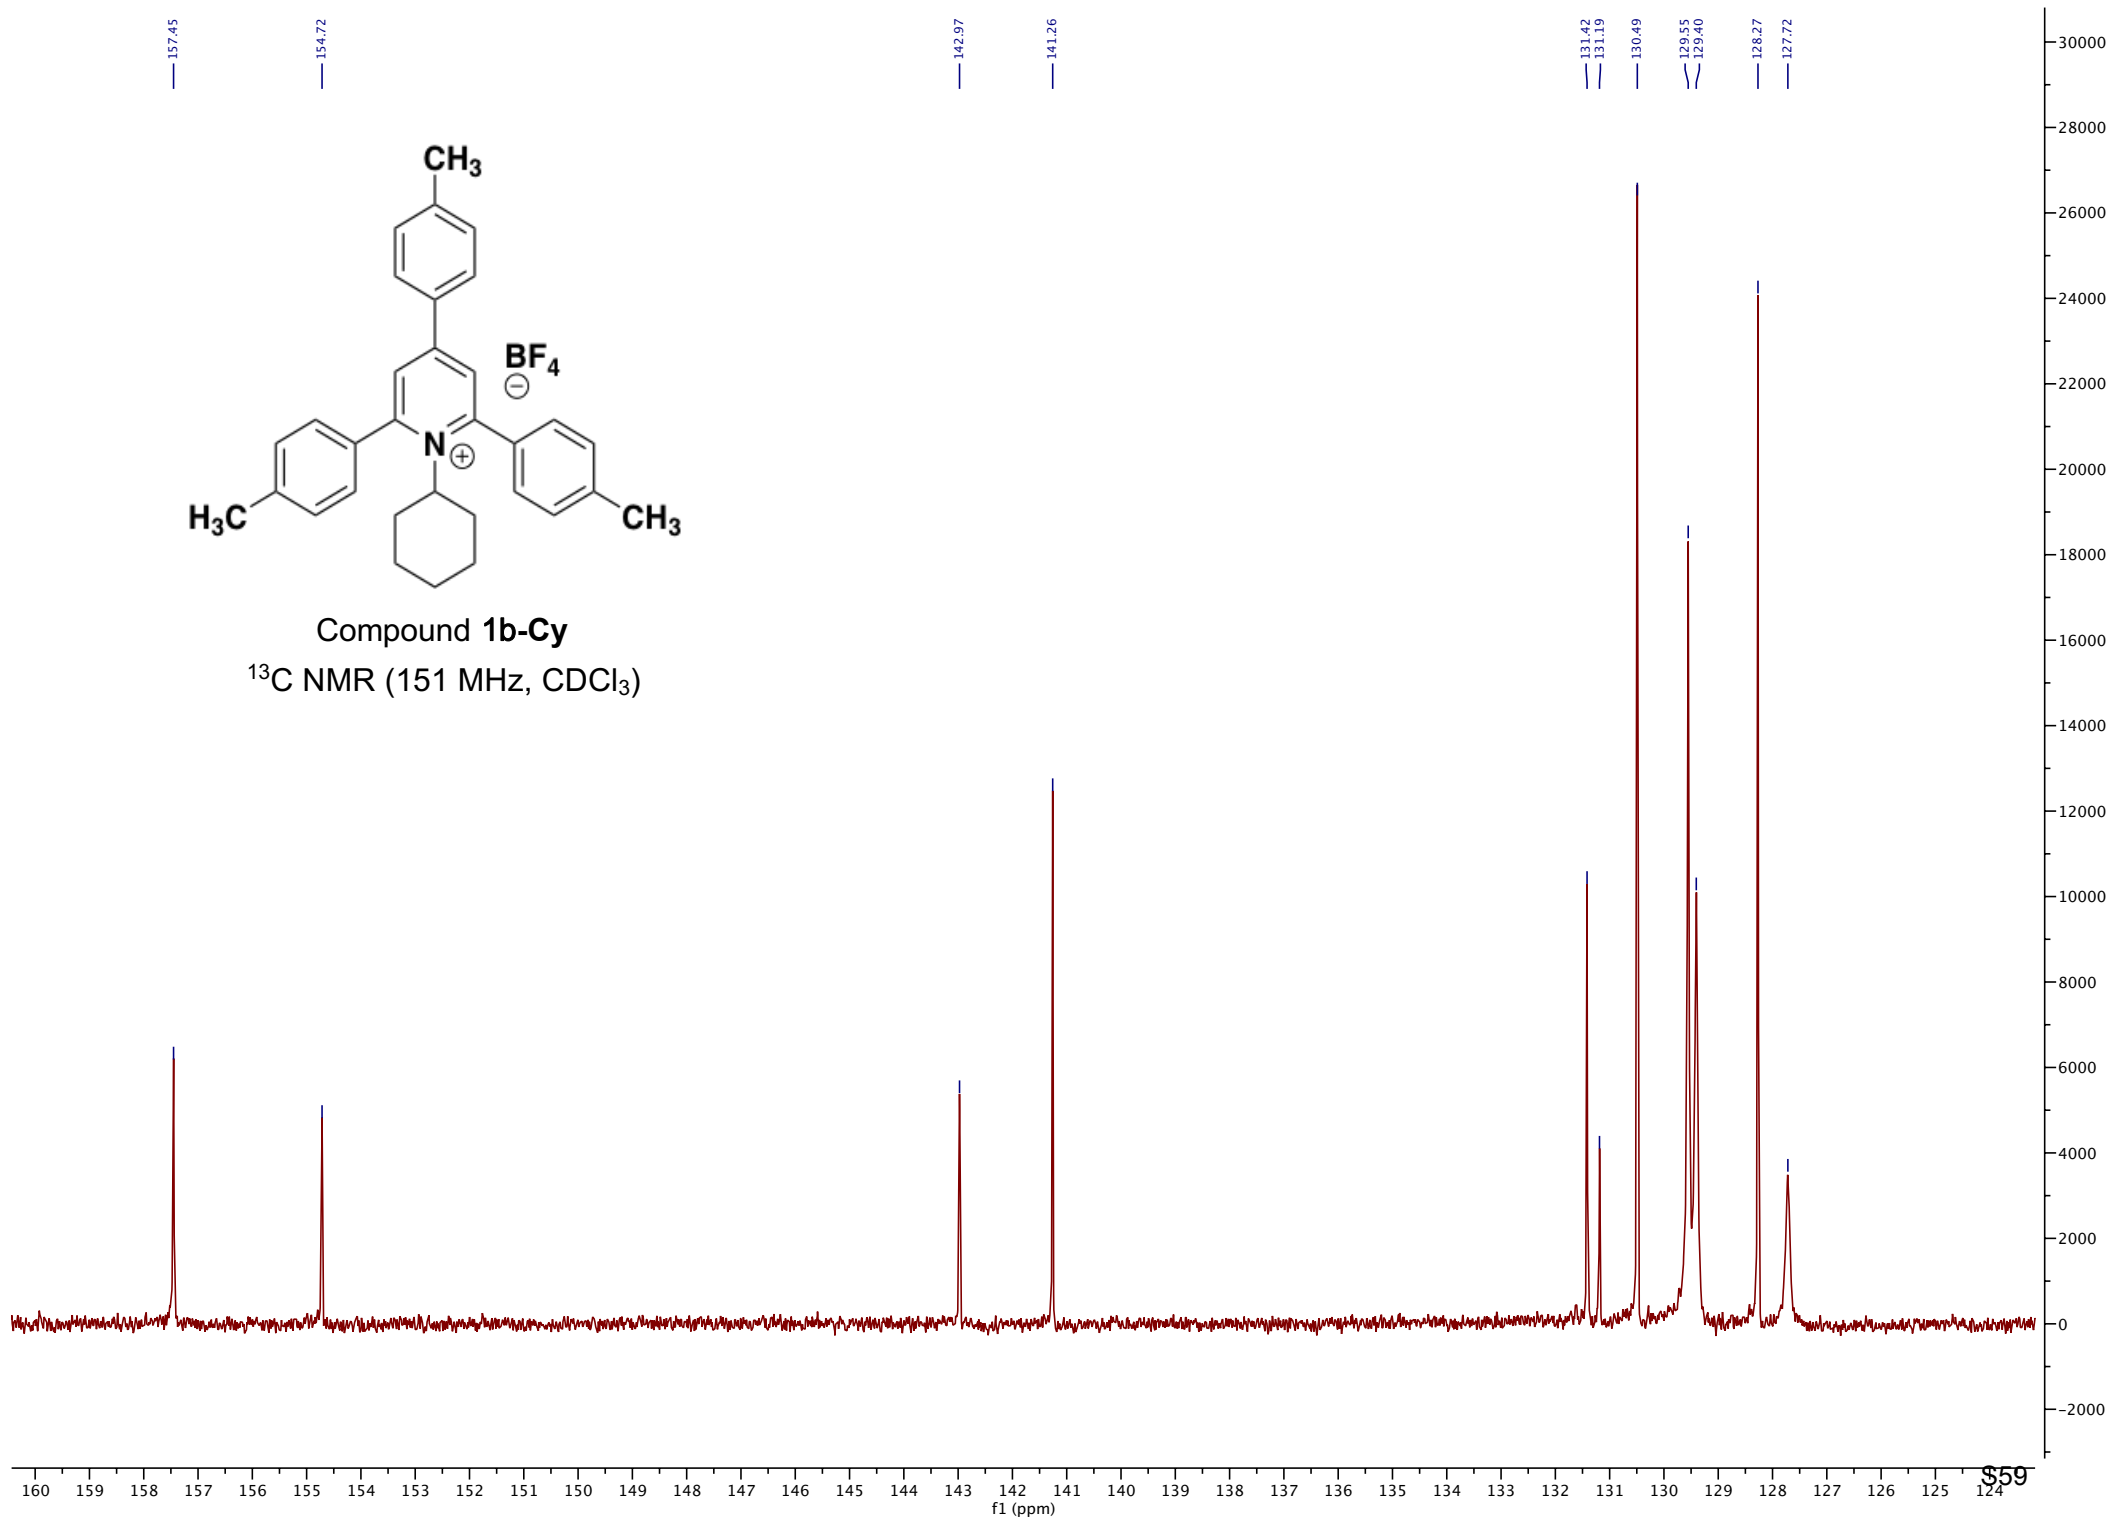

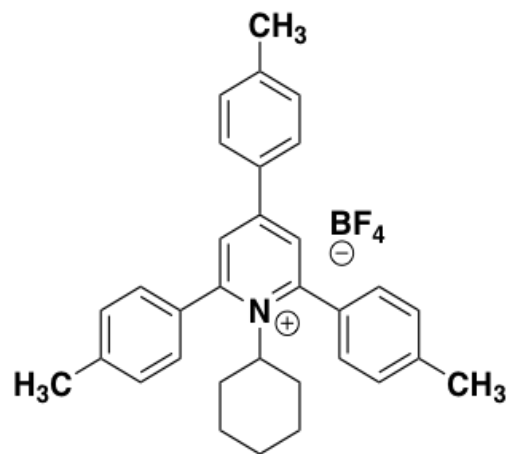

Compound 1b-Cy

<sup>19</sup>F NMR (376 MHz, CDCl<sub>3</sub>)

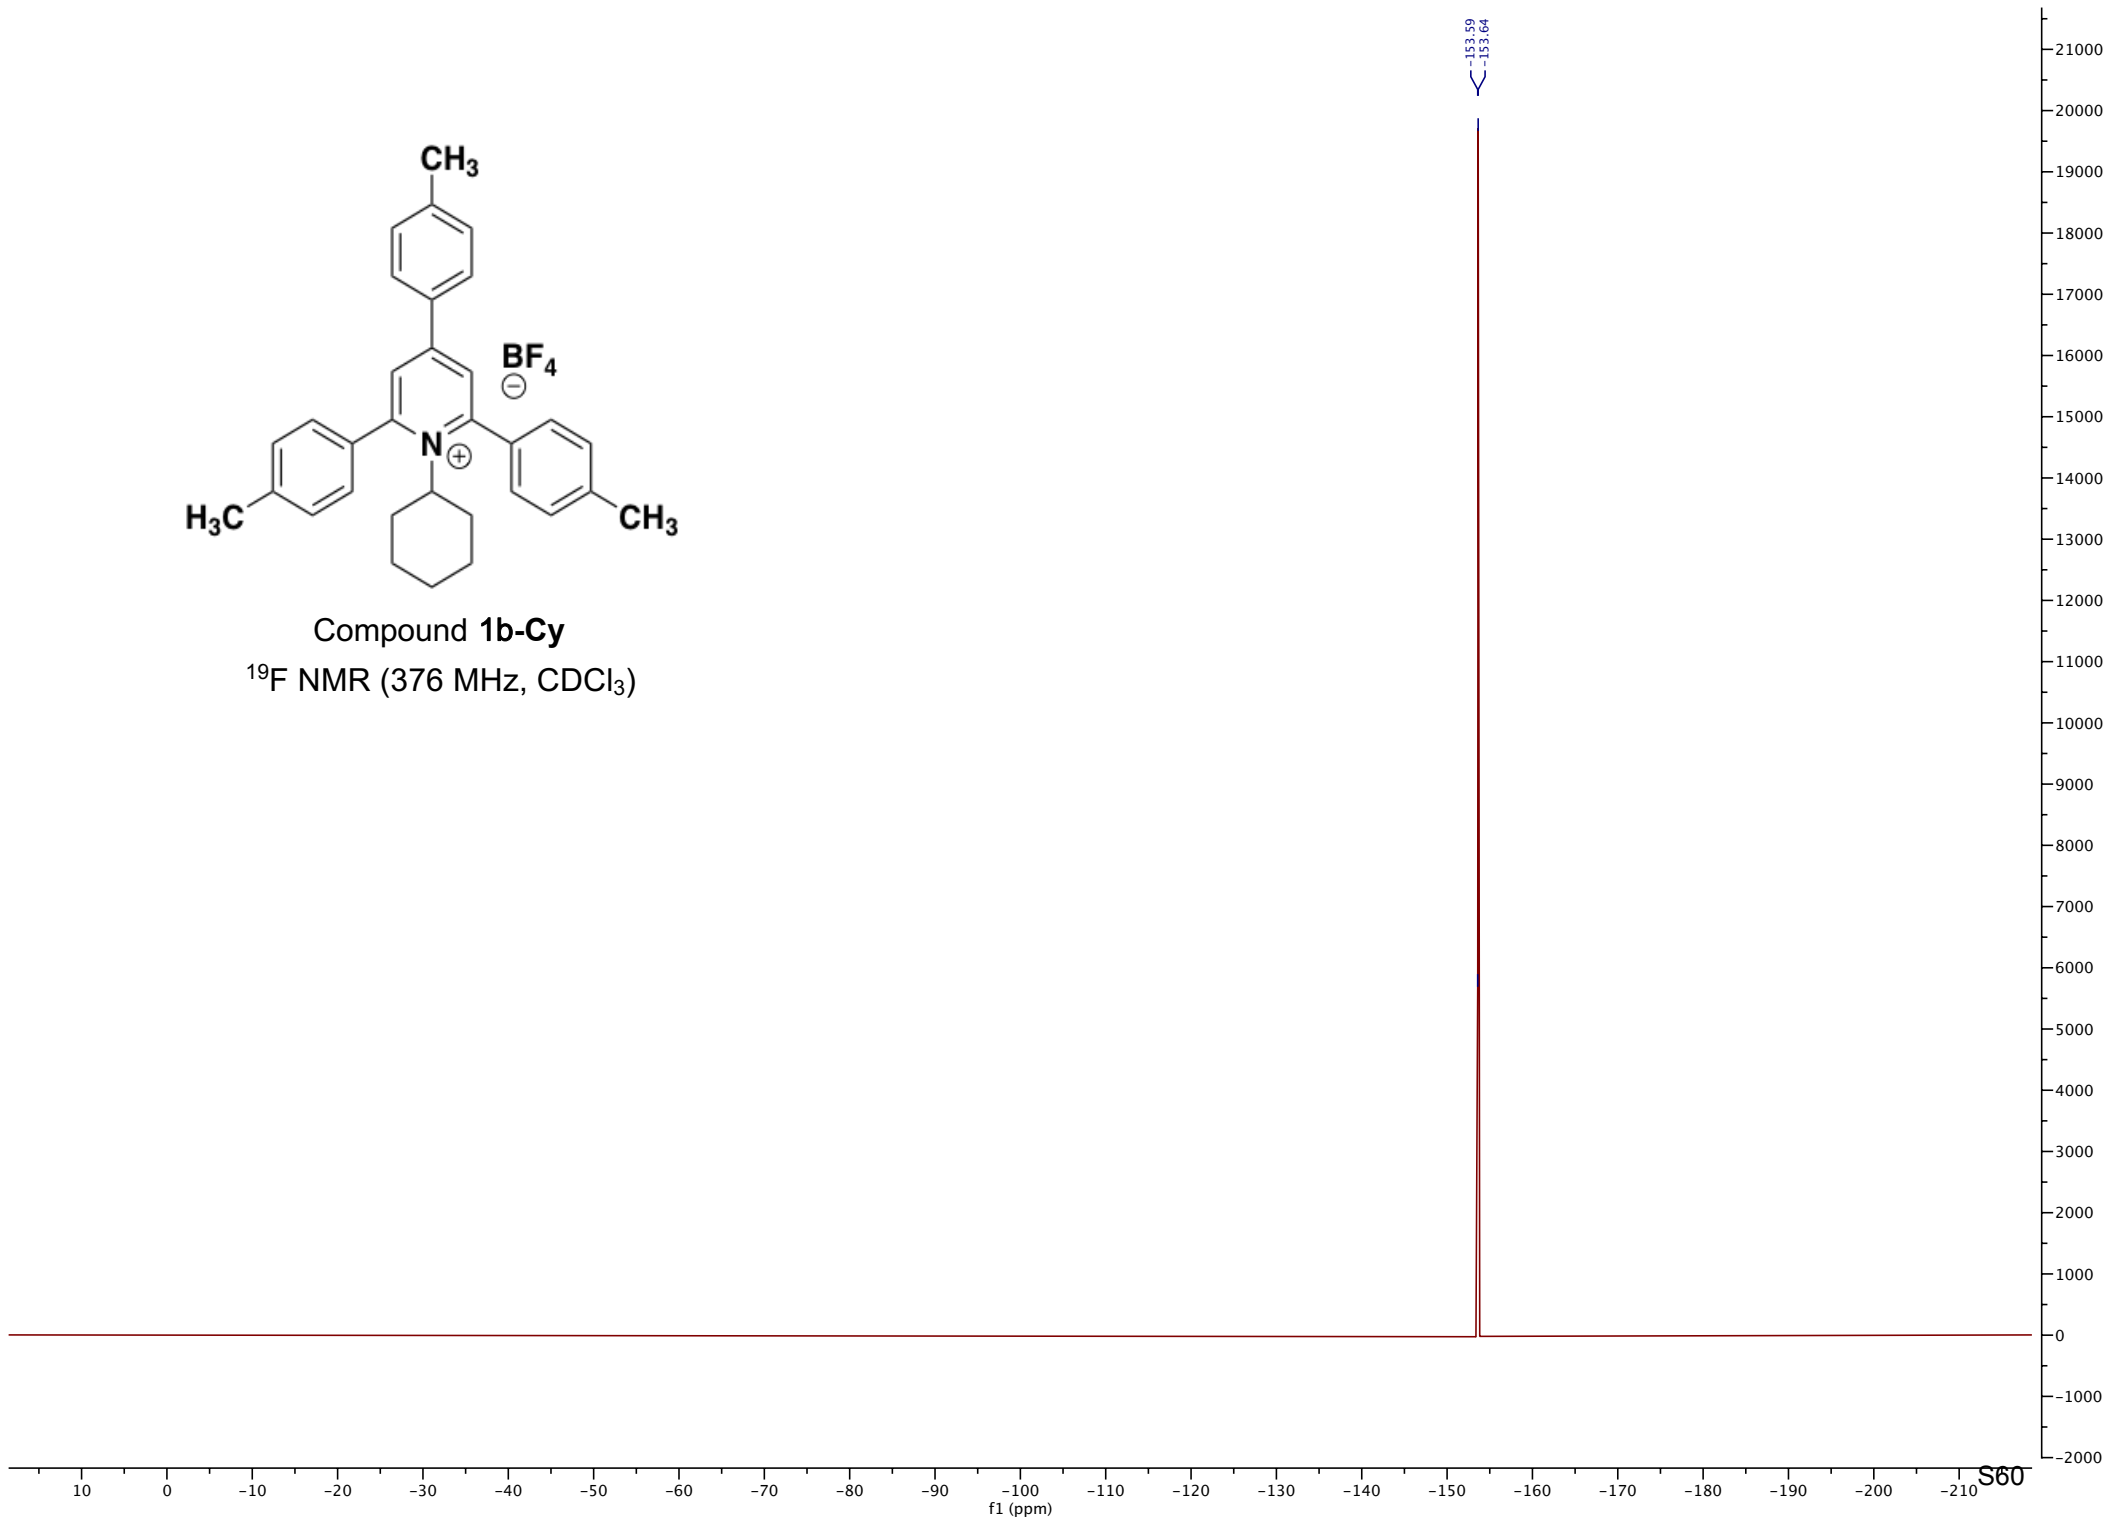

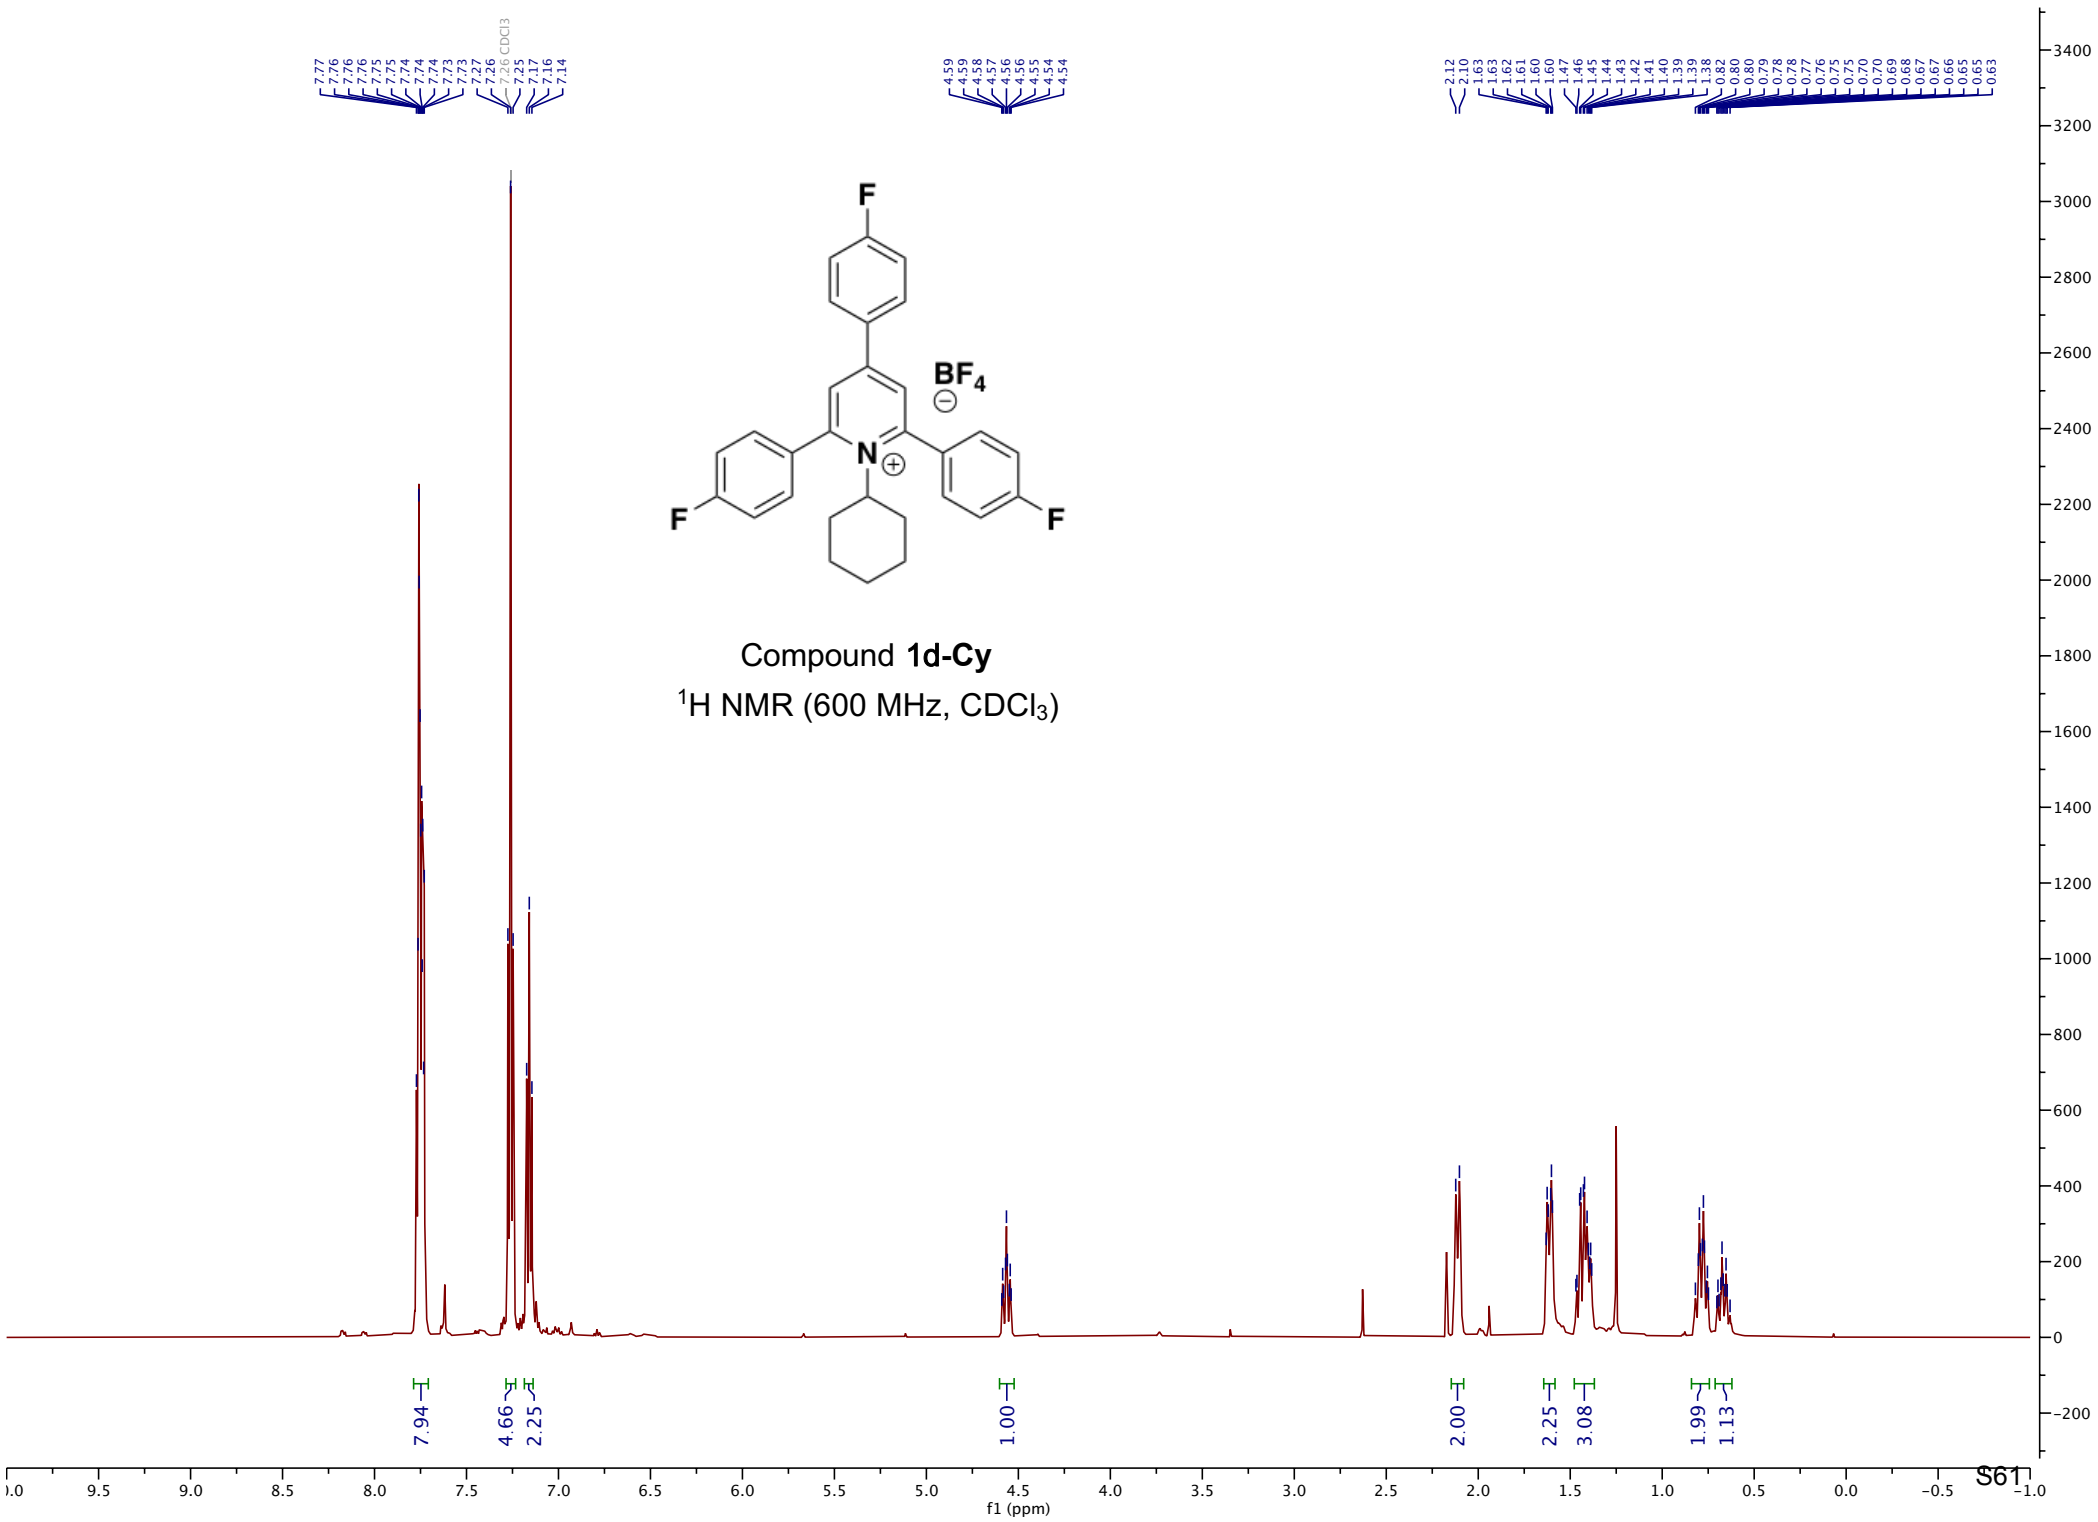

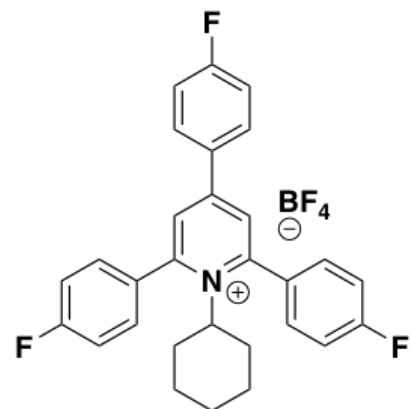

Compound 1d-Cy

$^{13}\text{C}$  NMR (151 MHz,  $\text{CDCl}_3$ )

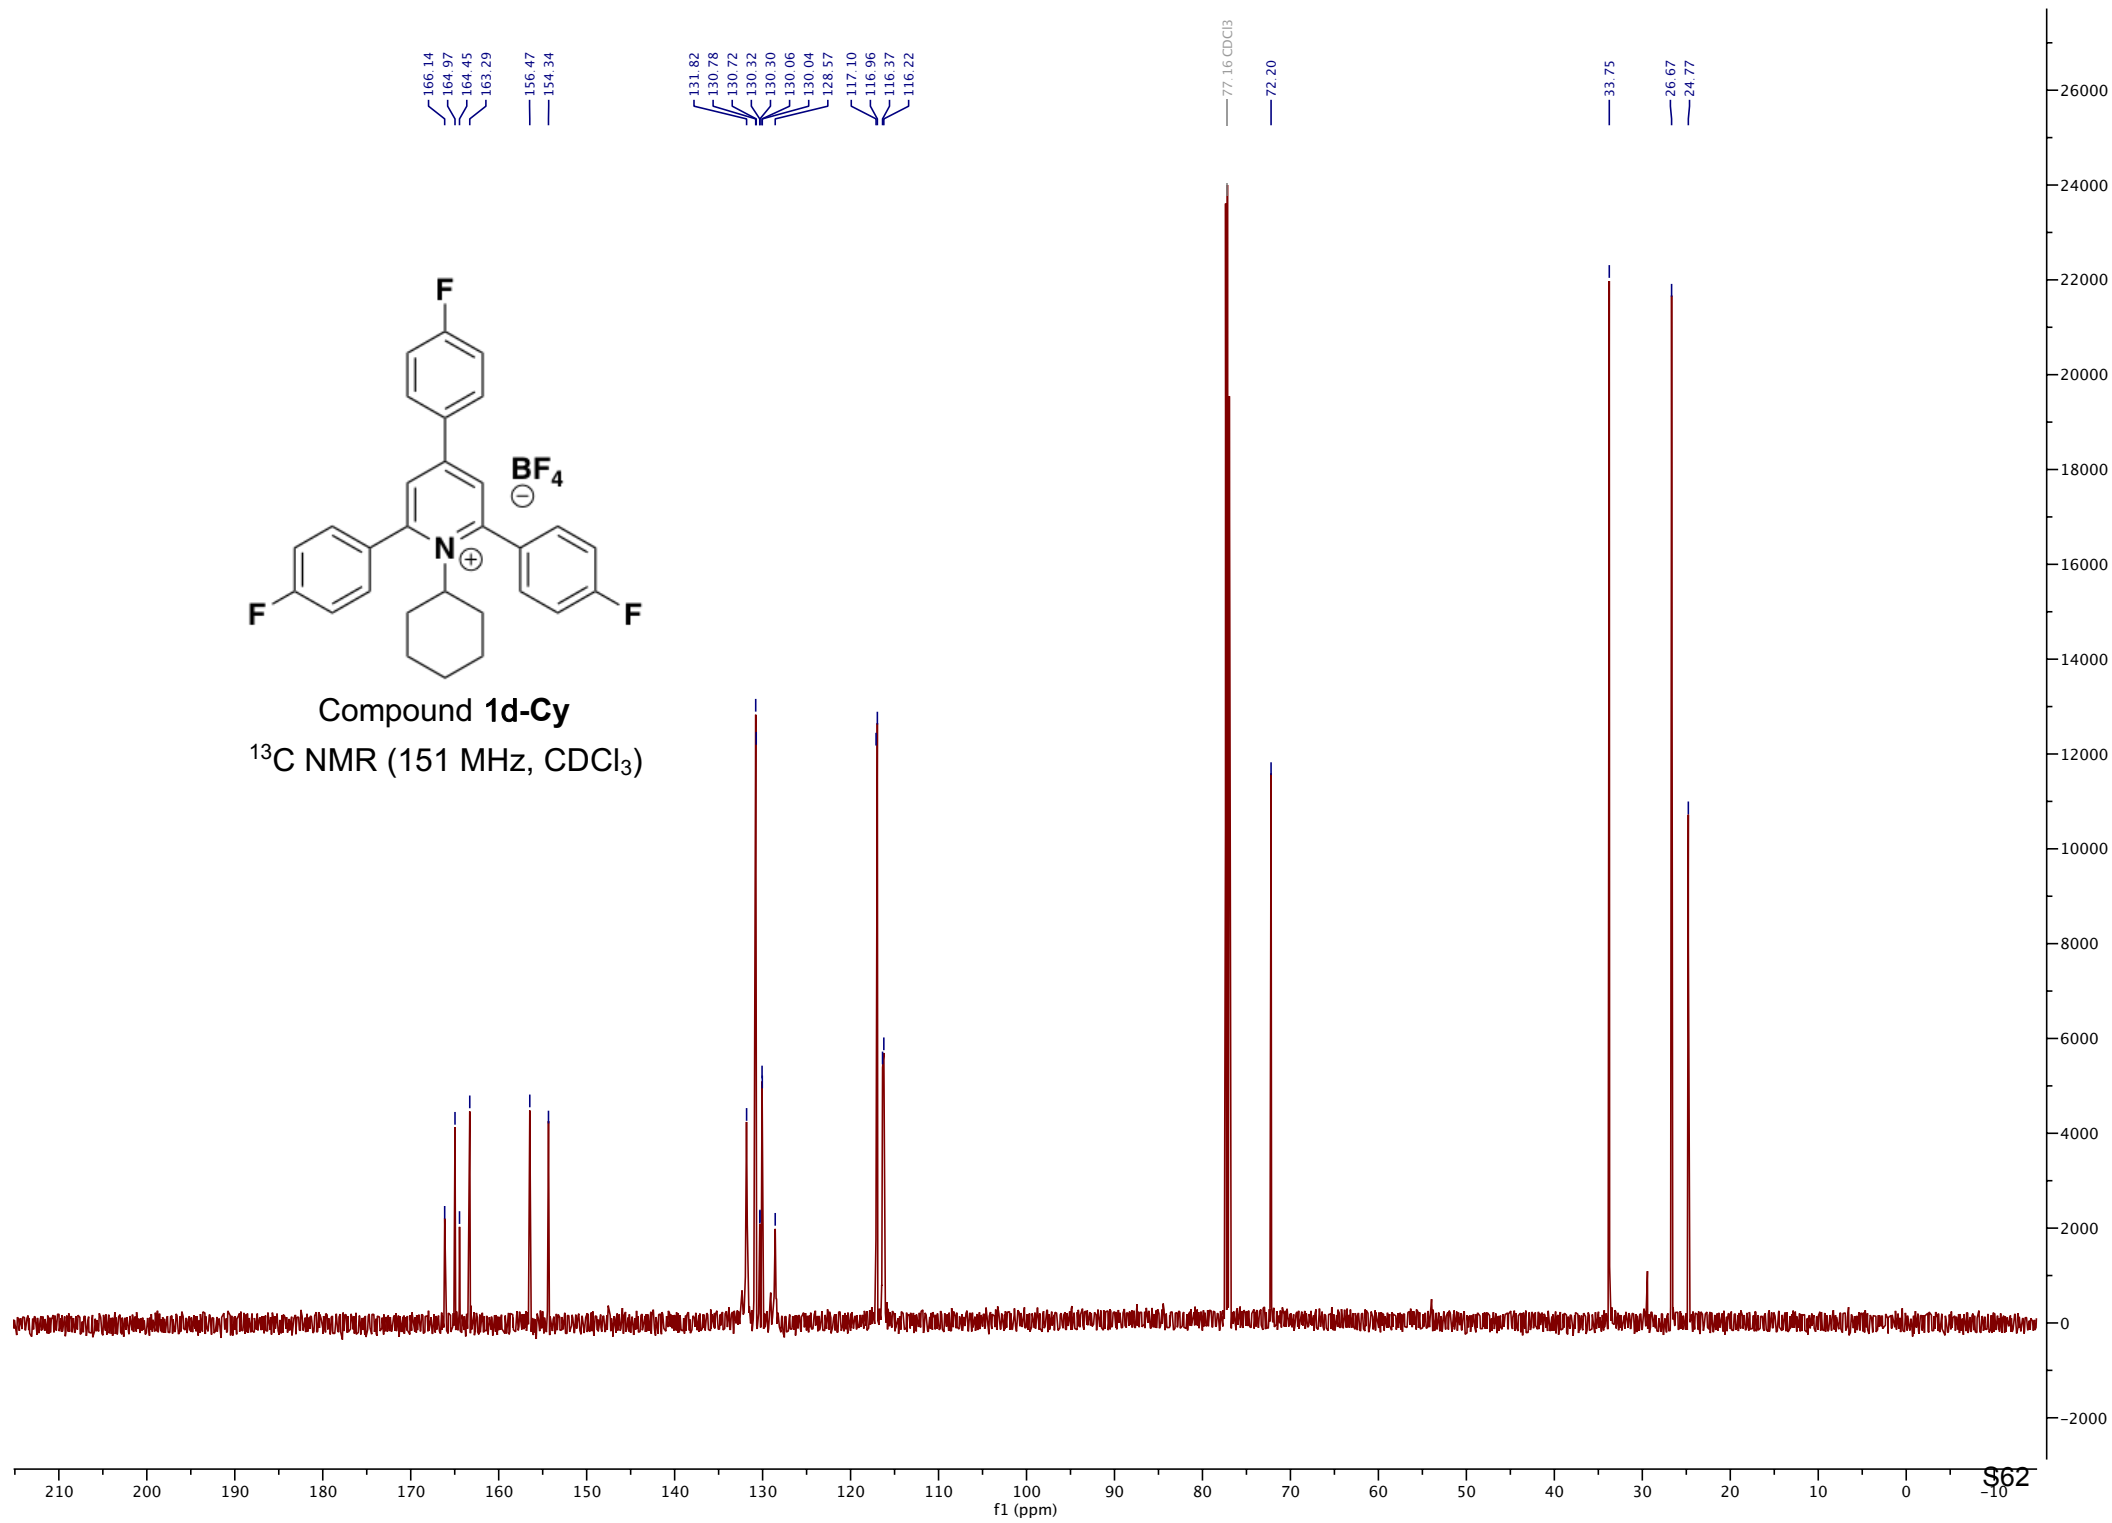

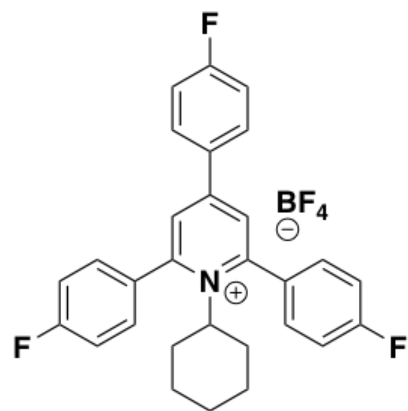

Compound 1d-Cy

<sup>19</sup>F NMR (376 MHz, CDCl<sub>3</sub>)

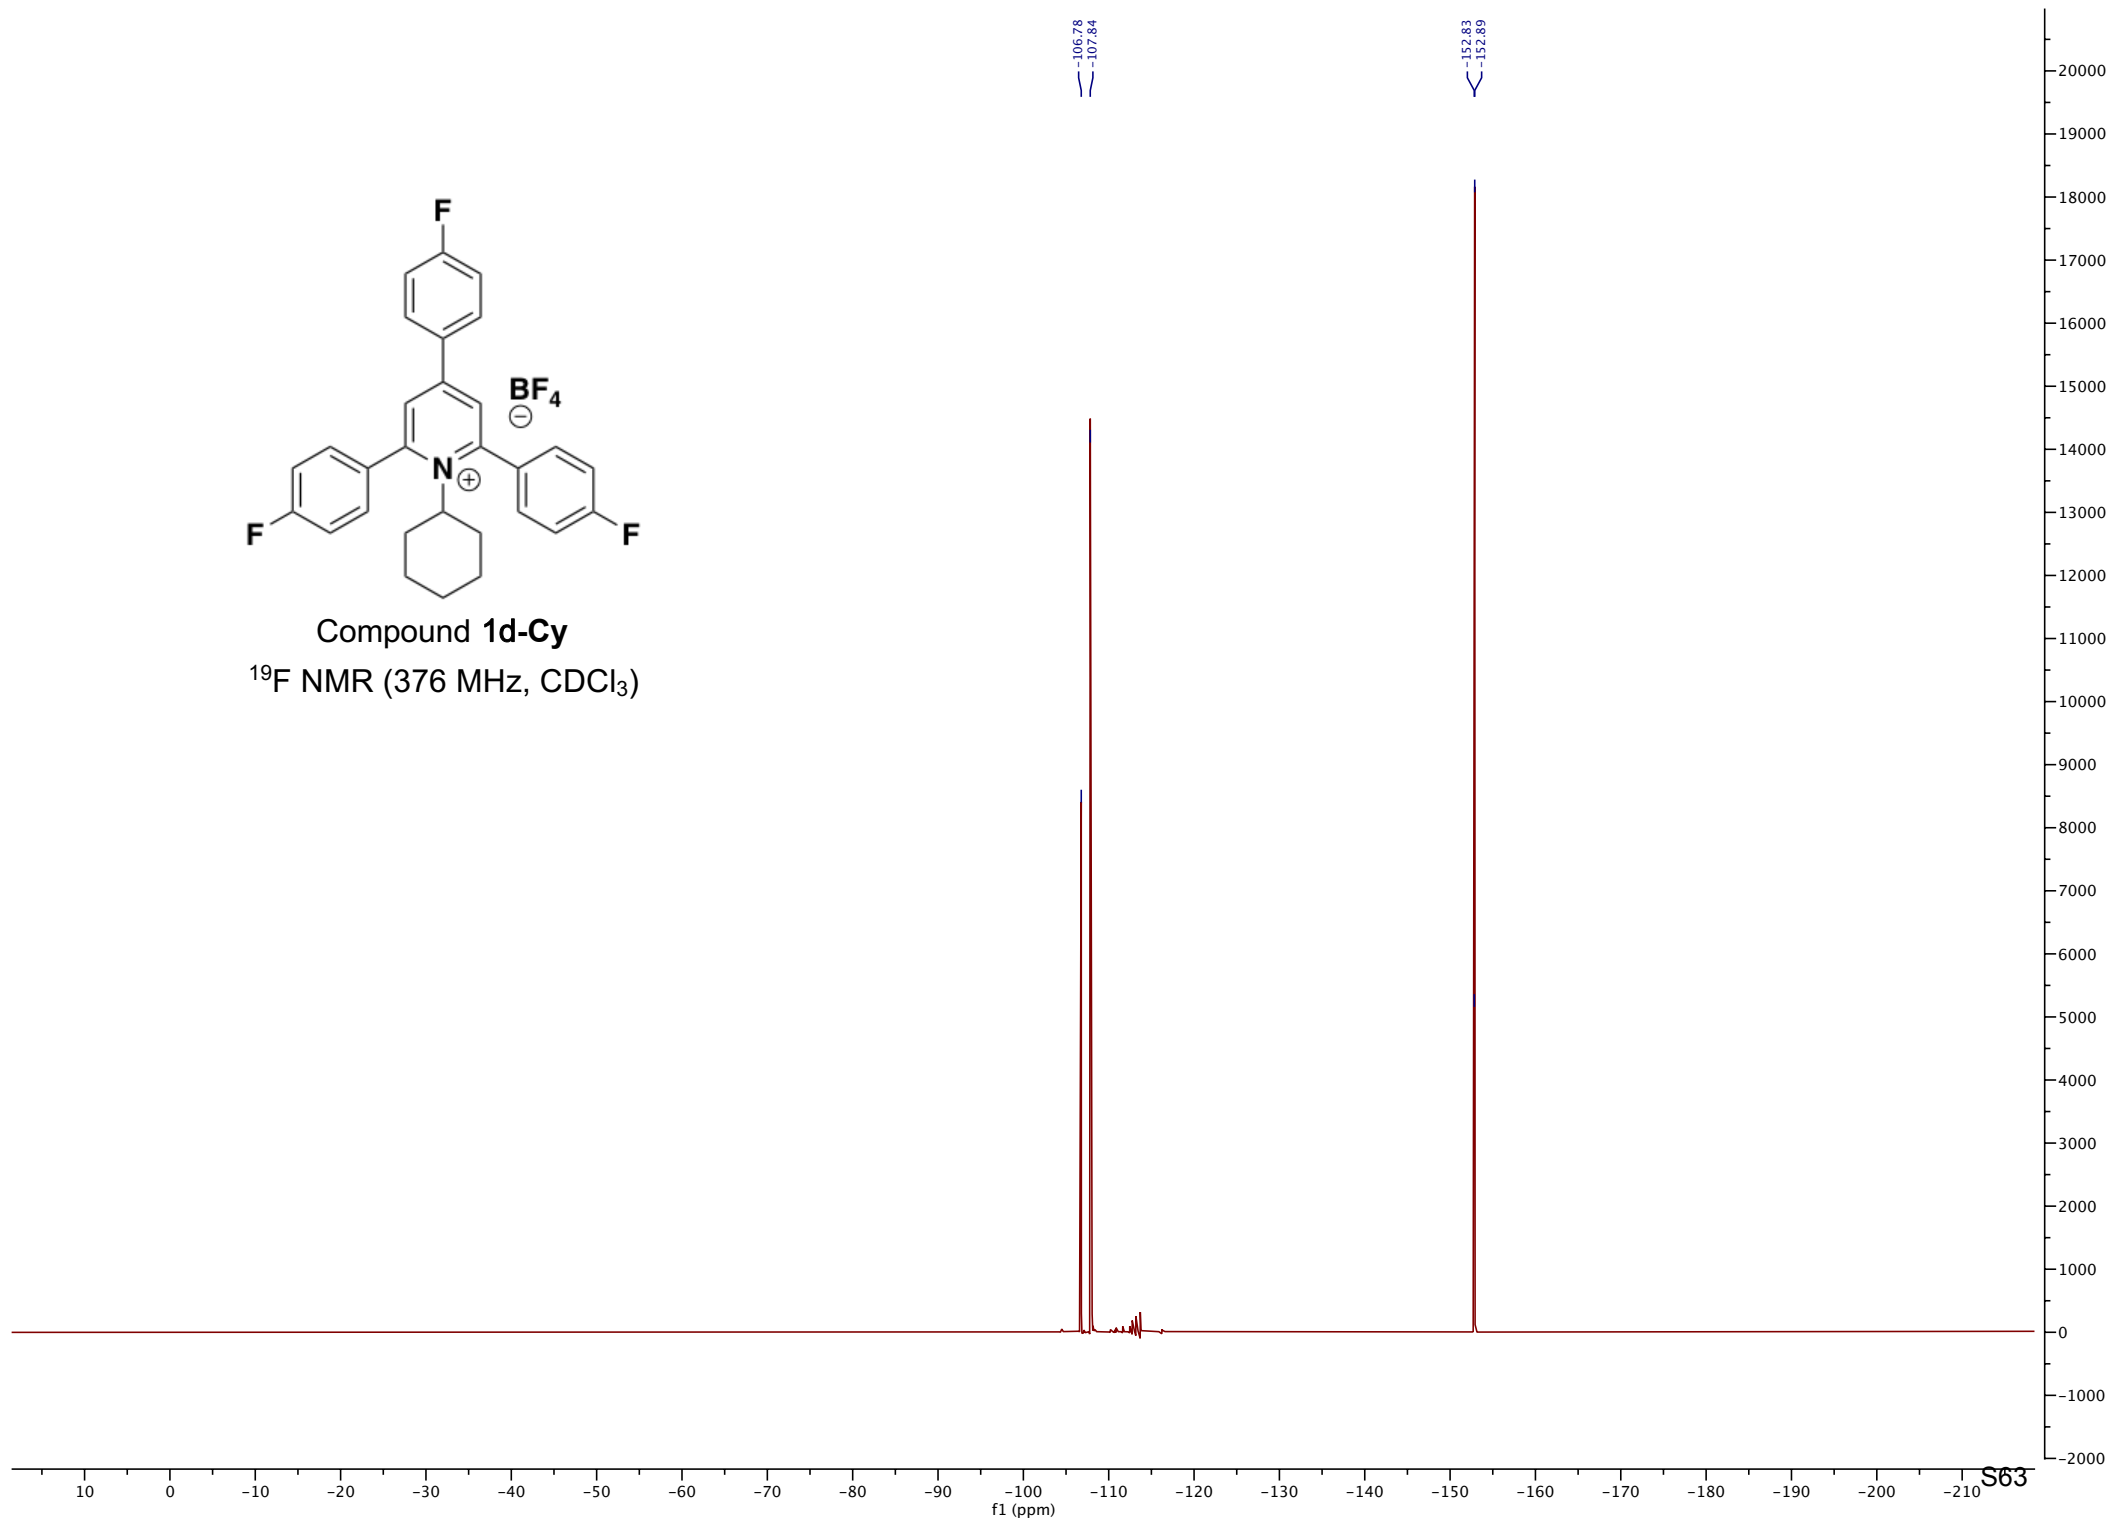

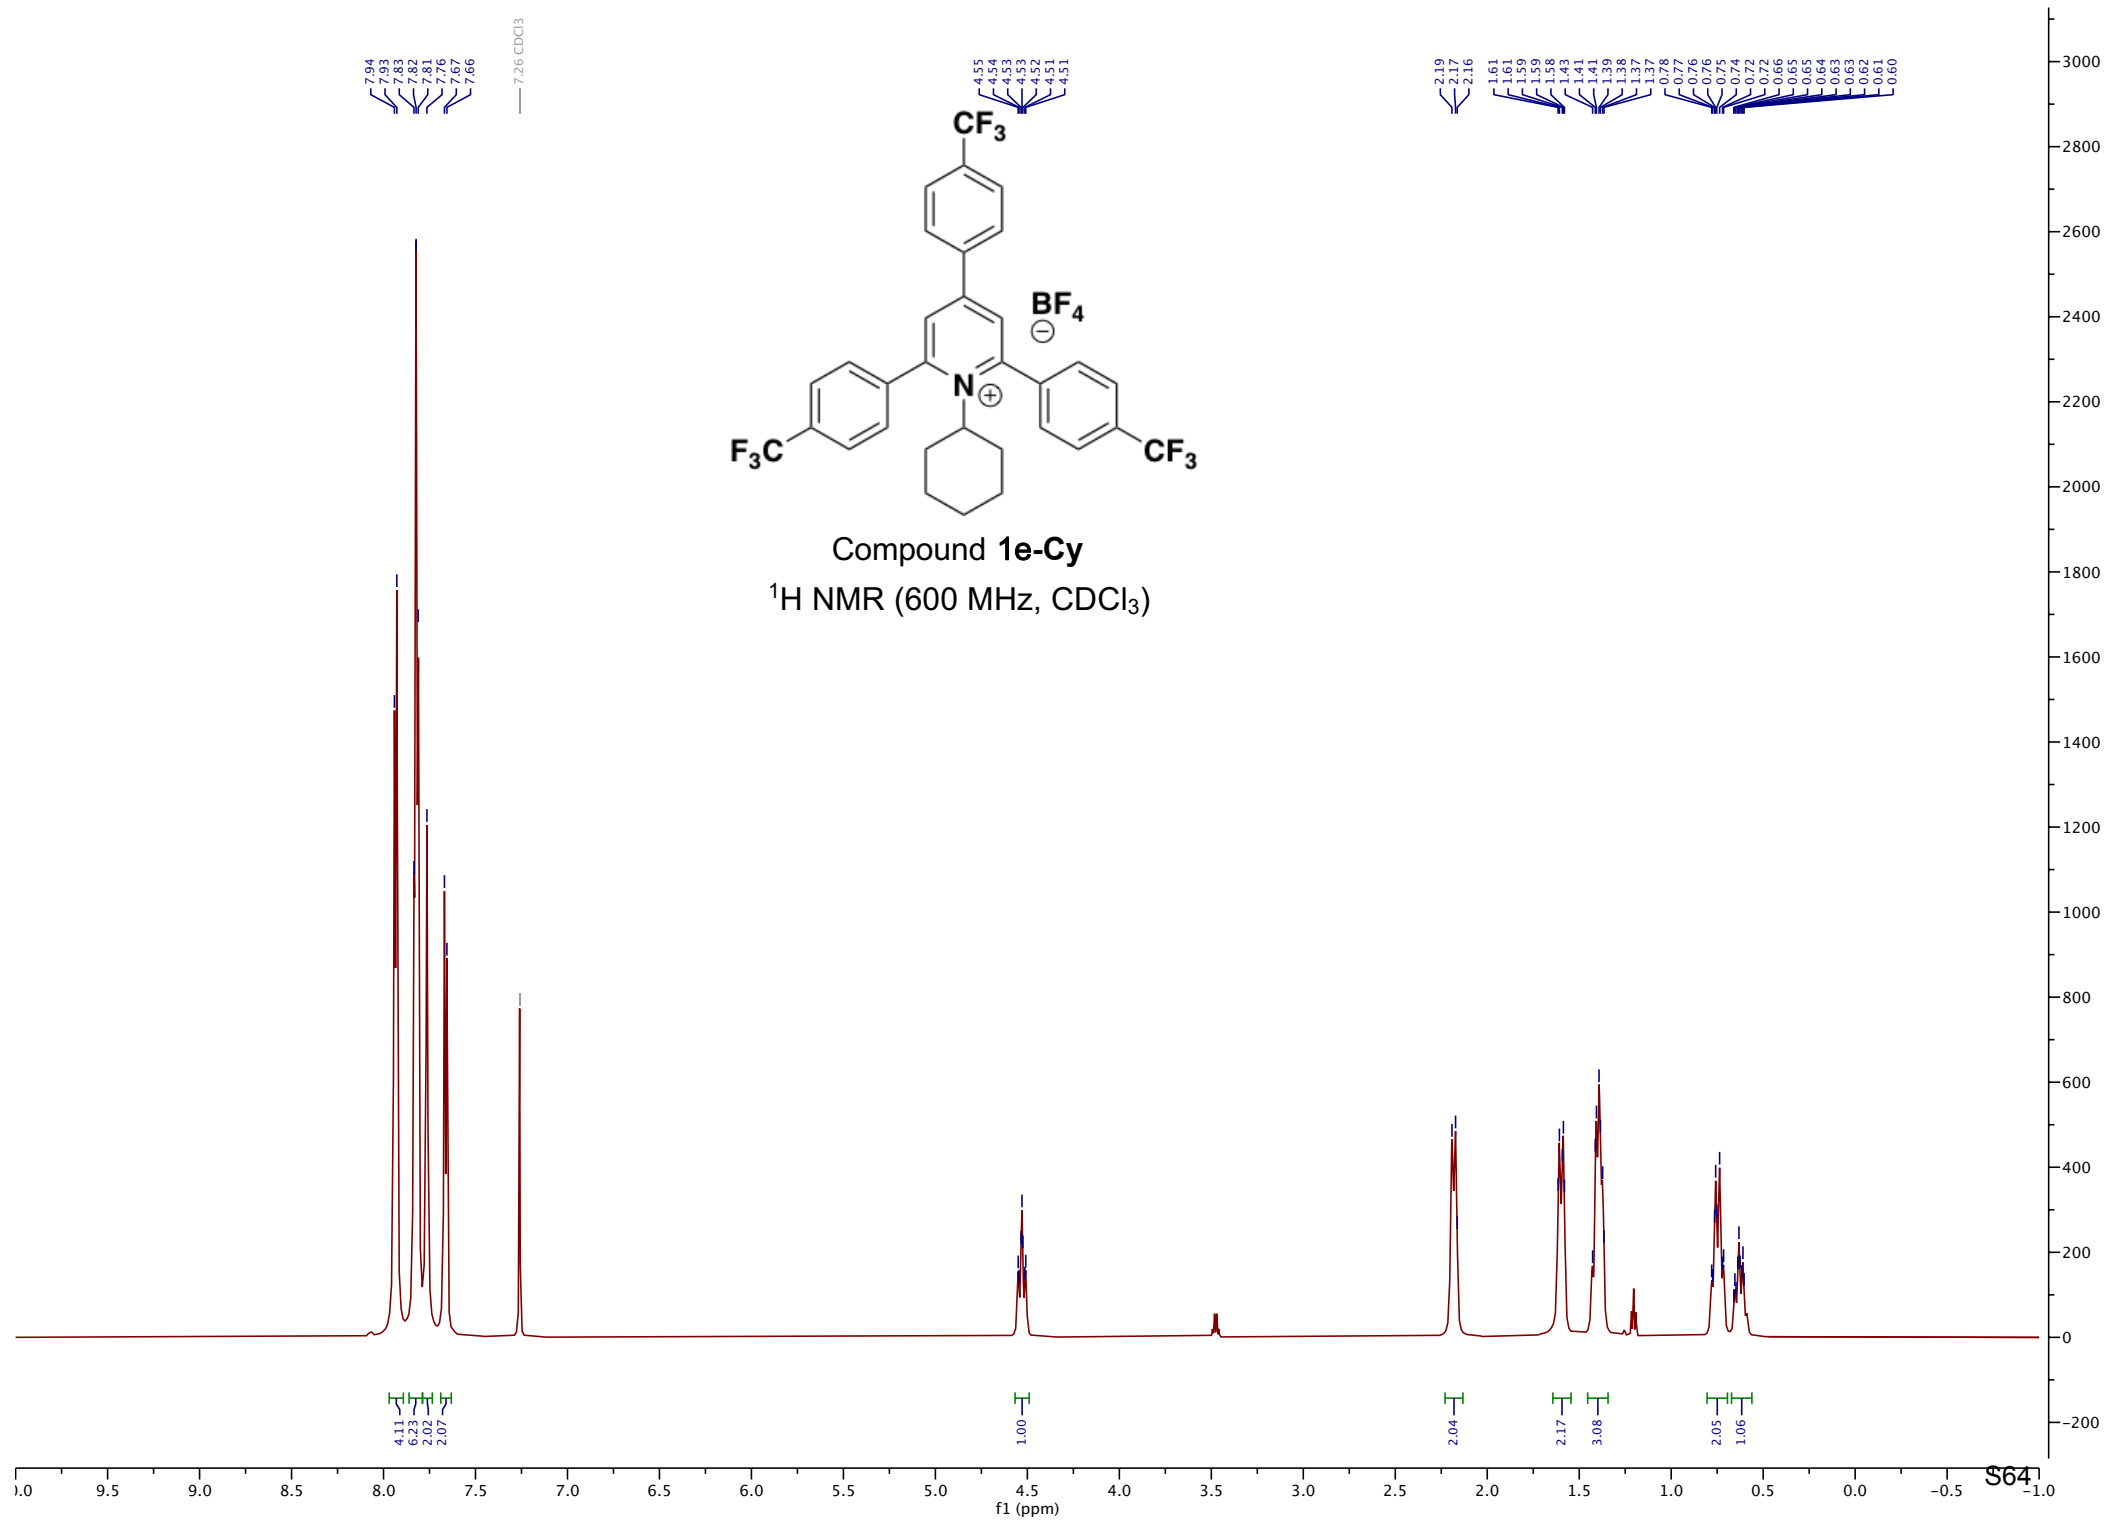



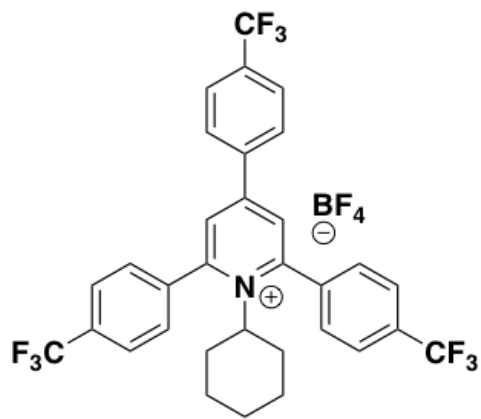

Compound 1e-Cy  
<sup>13</sup>C NMR (151 MHz, CDCl<sub>3</sub>)

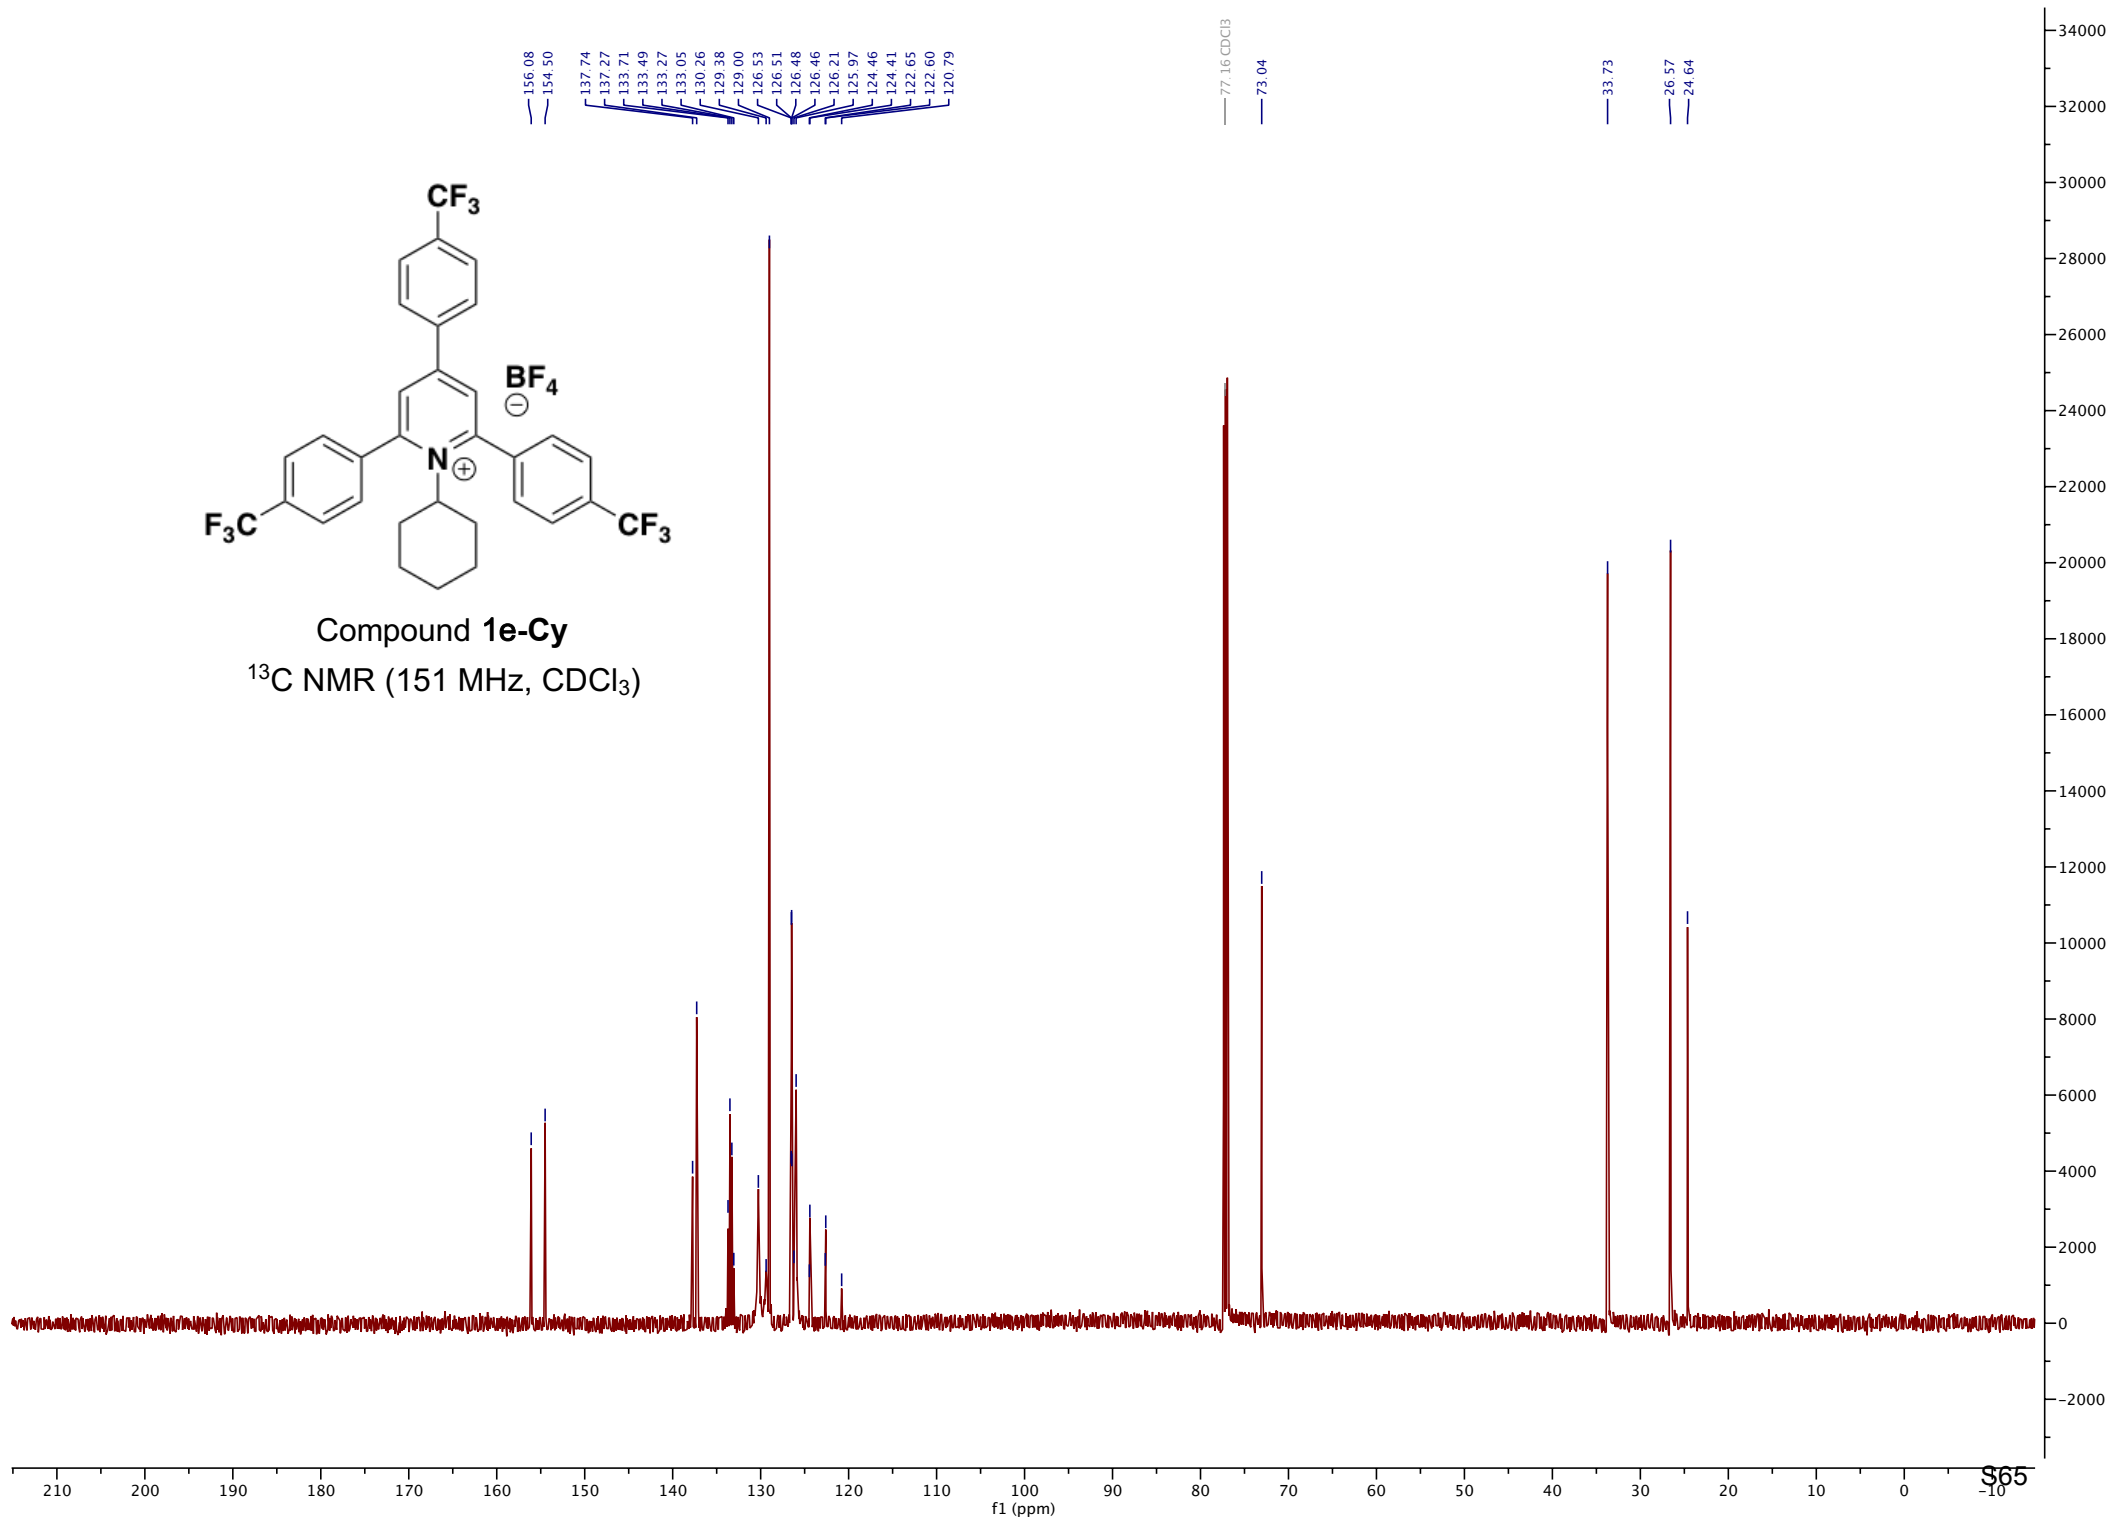

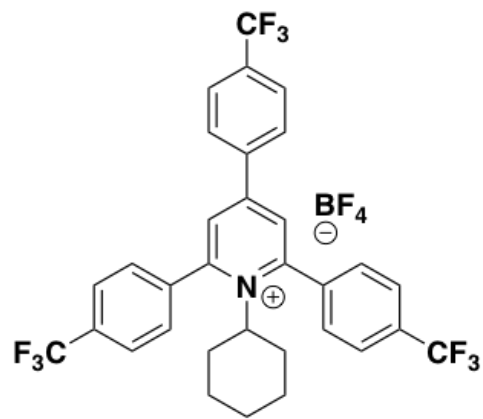

Compound 1e-Cy  
<sup>19</sup>F NMR (376 MHz, CDCl<sub>3</sub>)

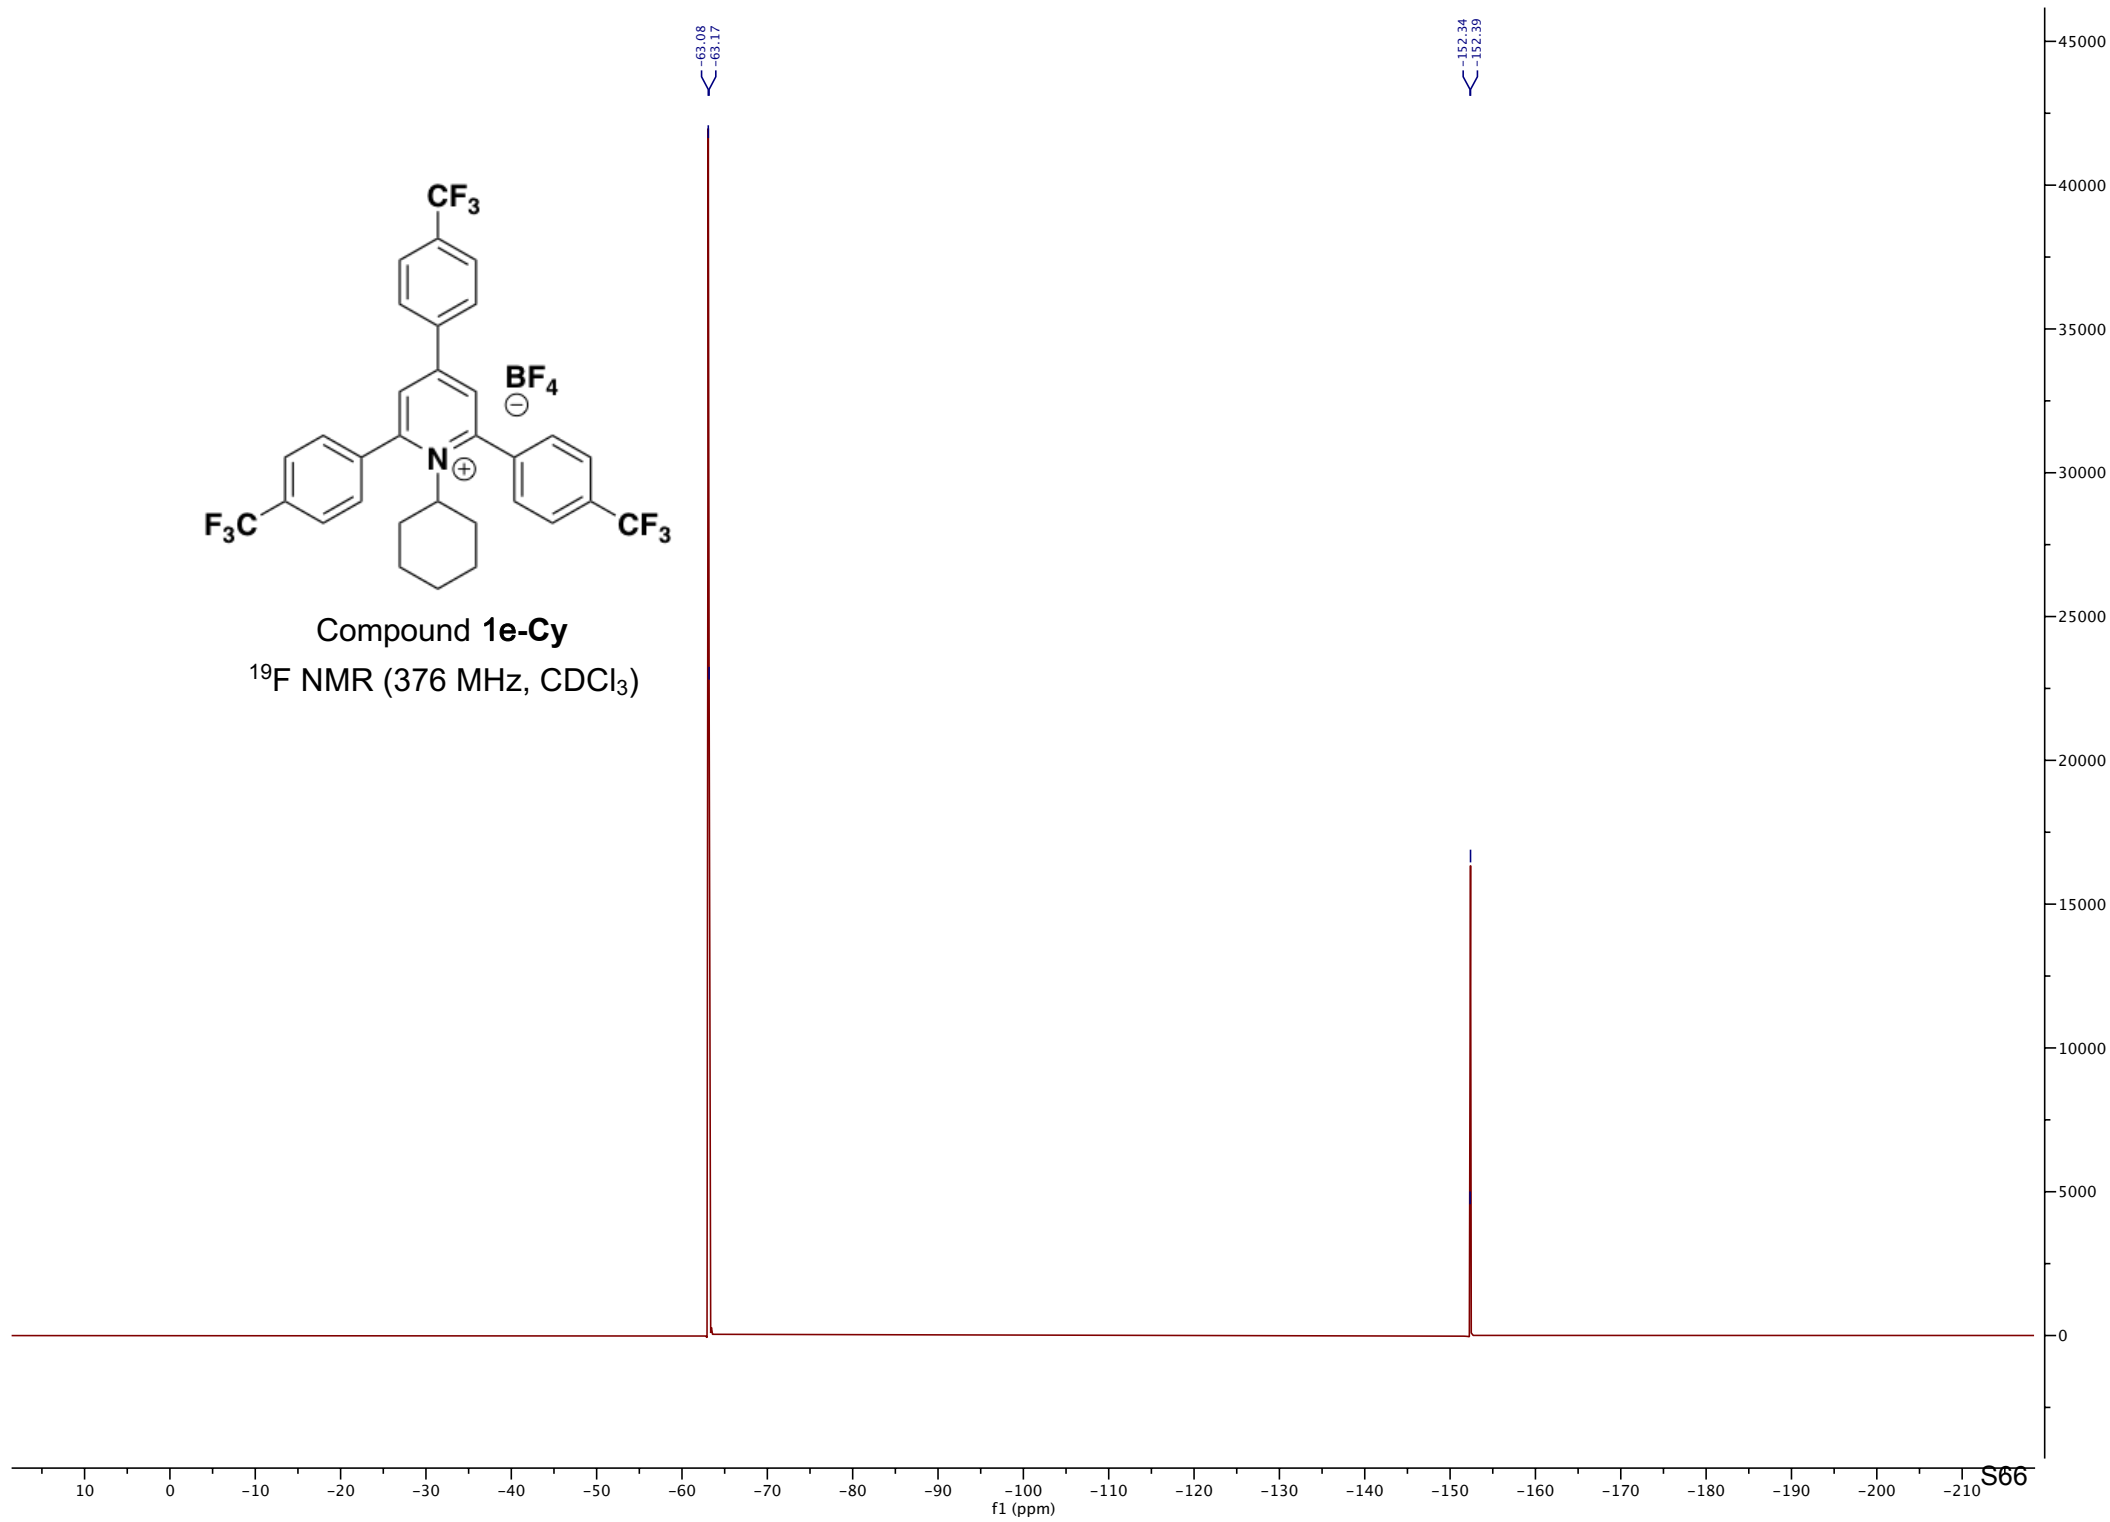

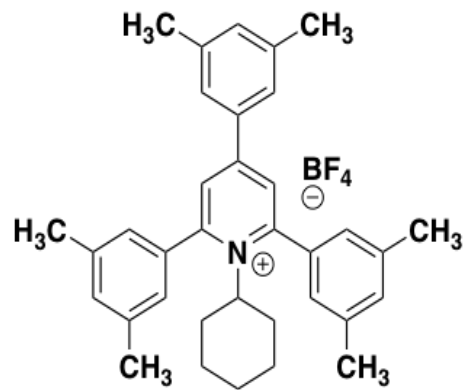

Compound 1g-Cy

$^1\text{H}$  NMR (600 MHz,  $\text{CDCl}_3$ )

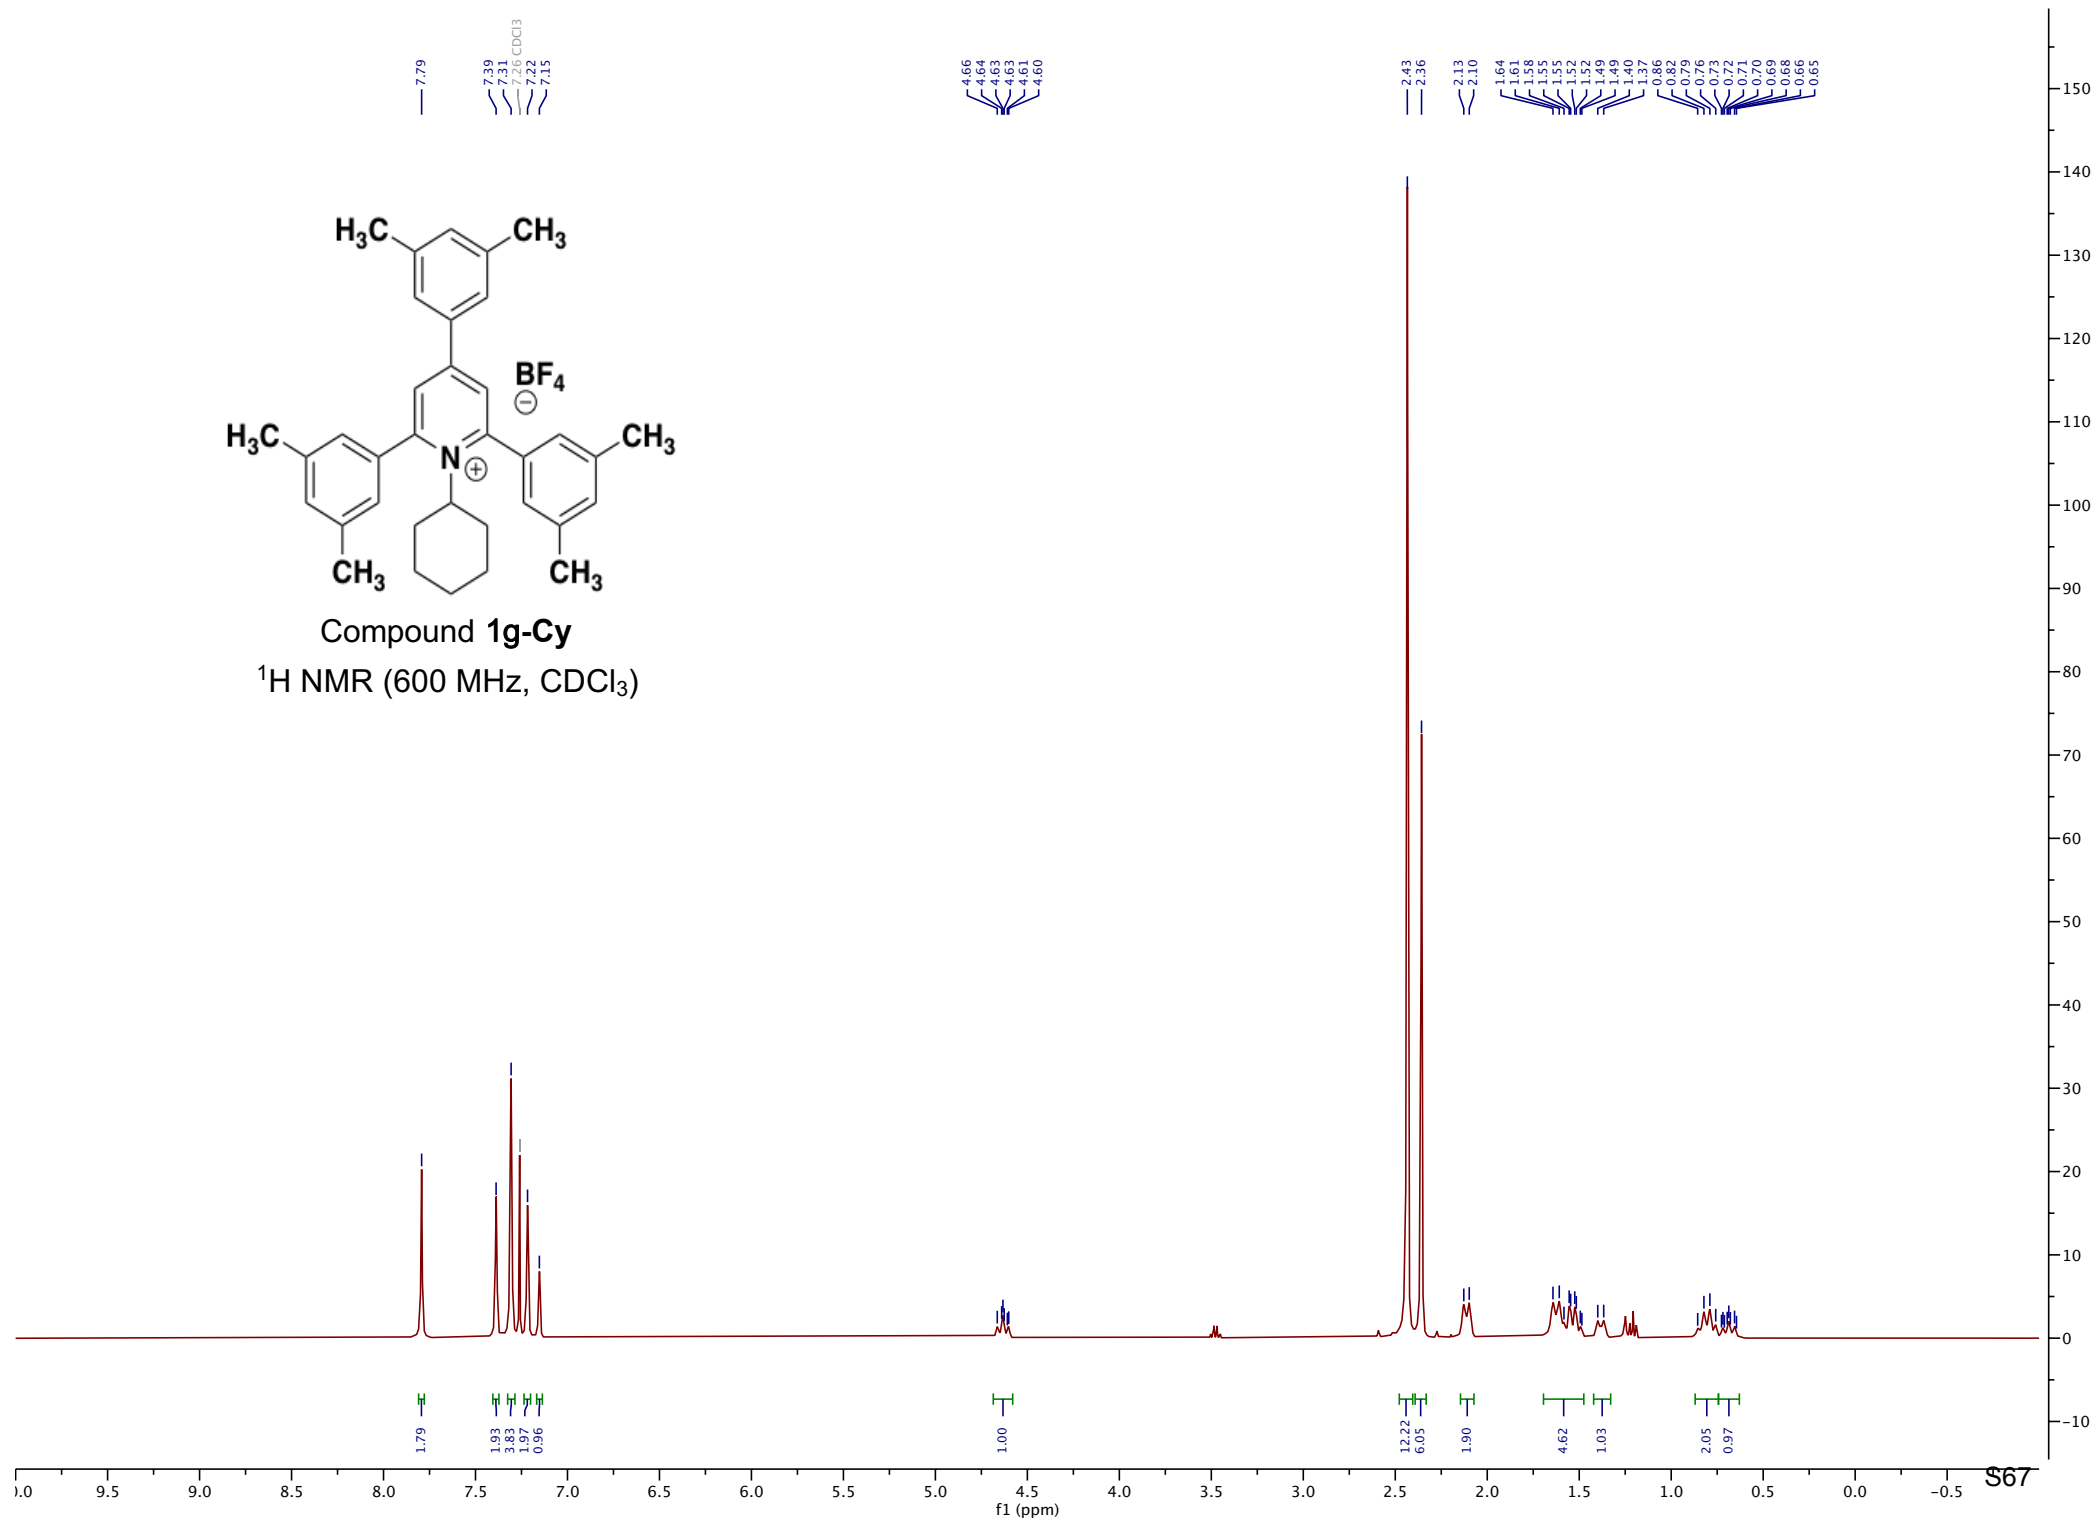

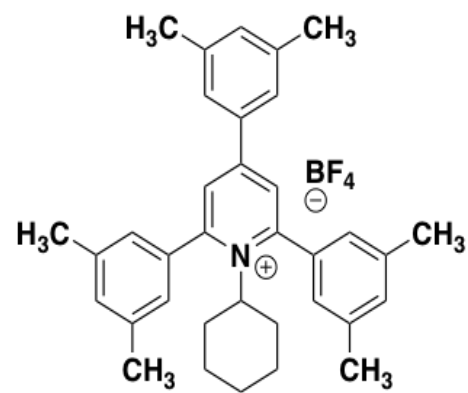

Compound 1g-Cy

<sup>13</sup>C NMR (151 MHz, CDCl<sub>3</sub>)

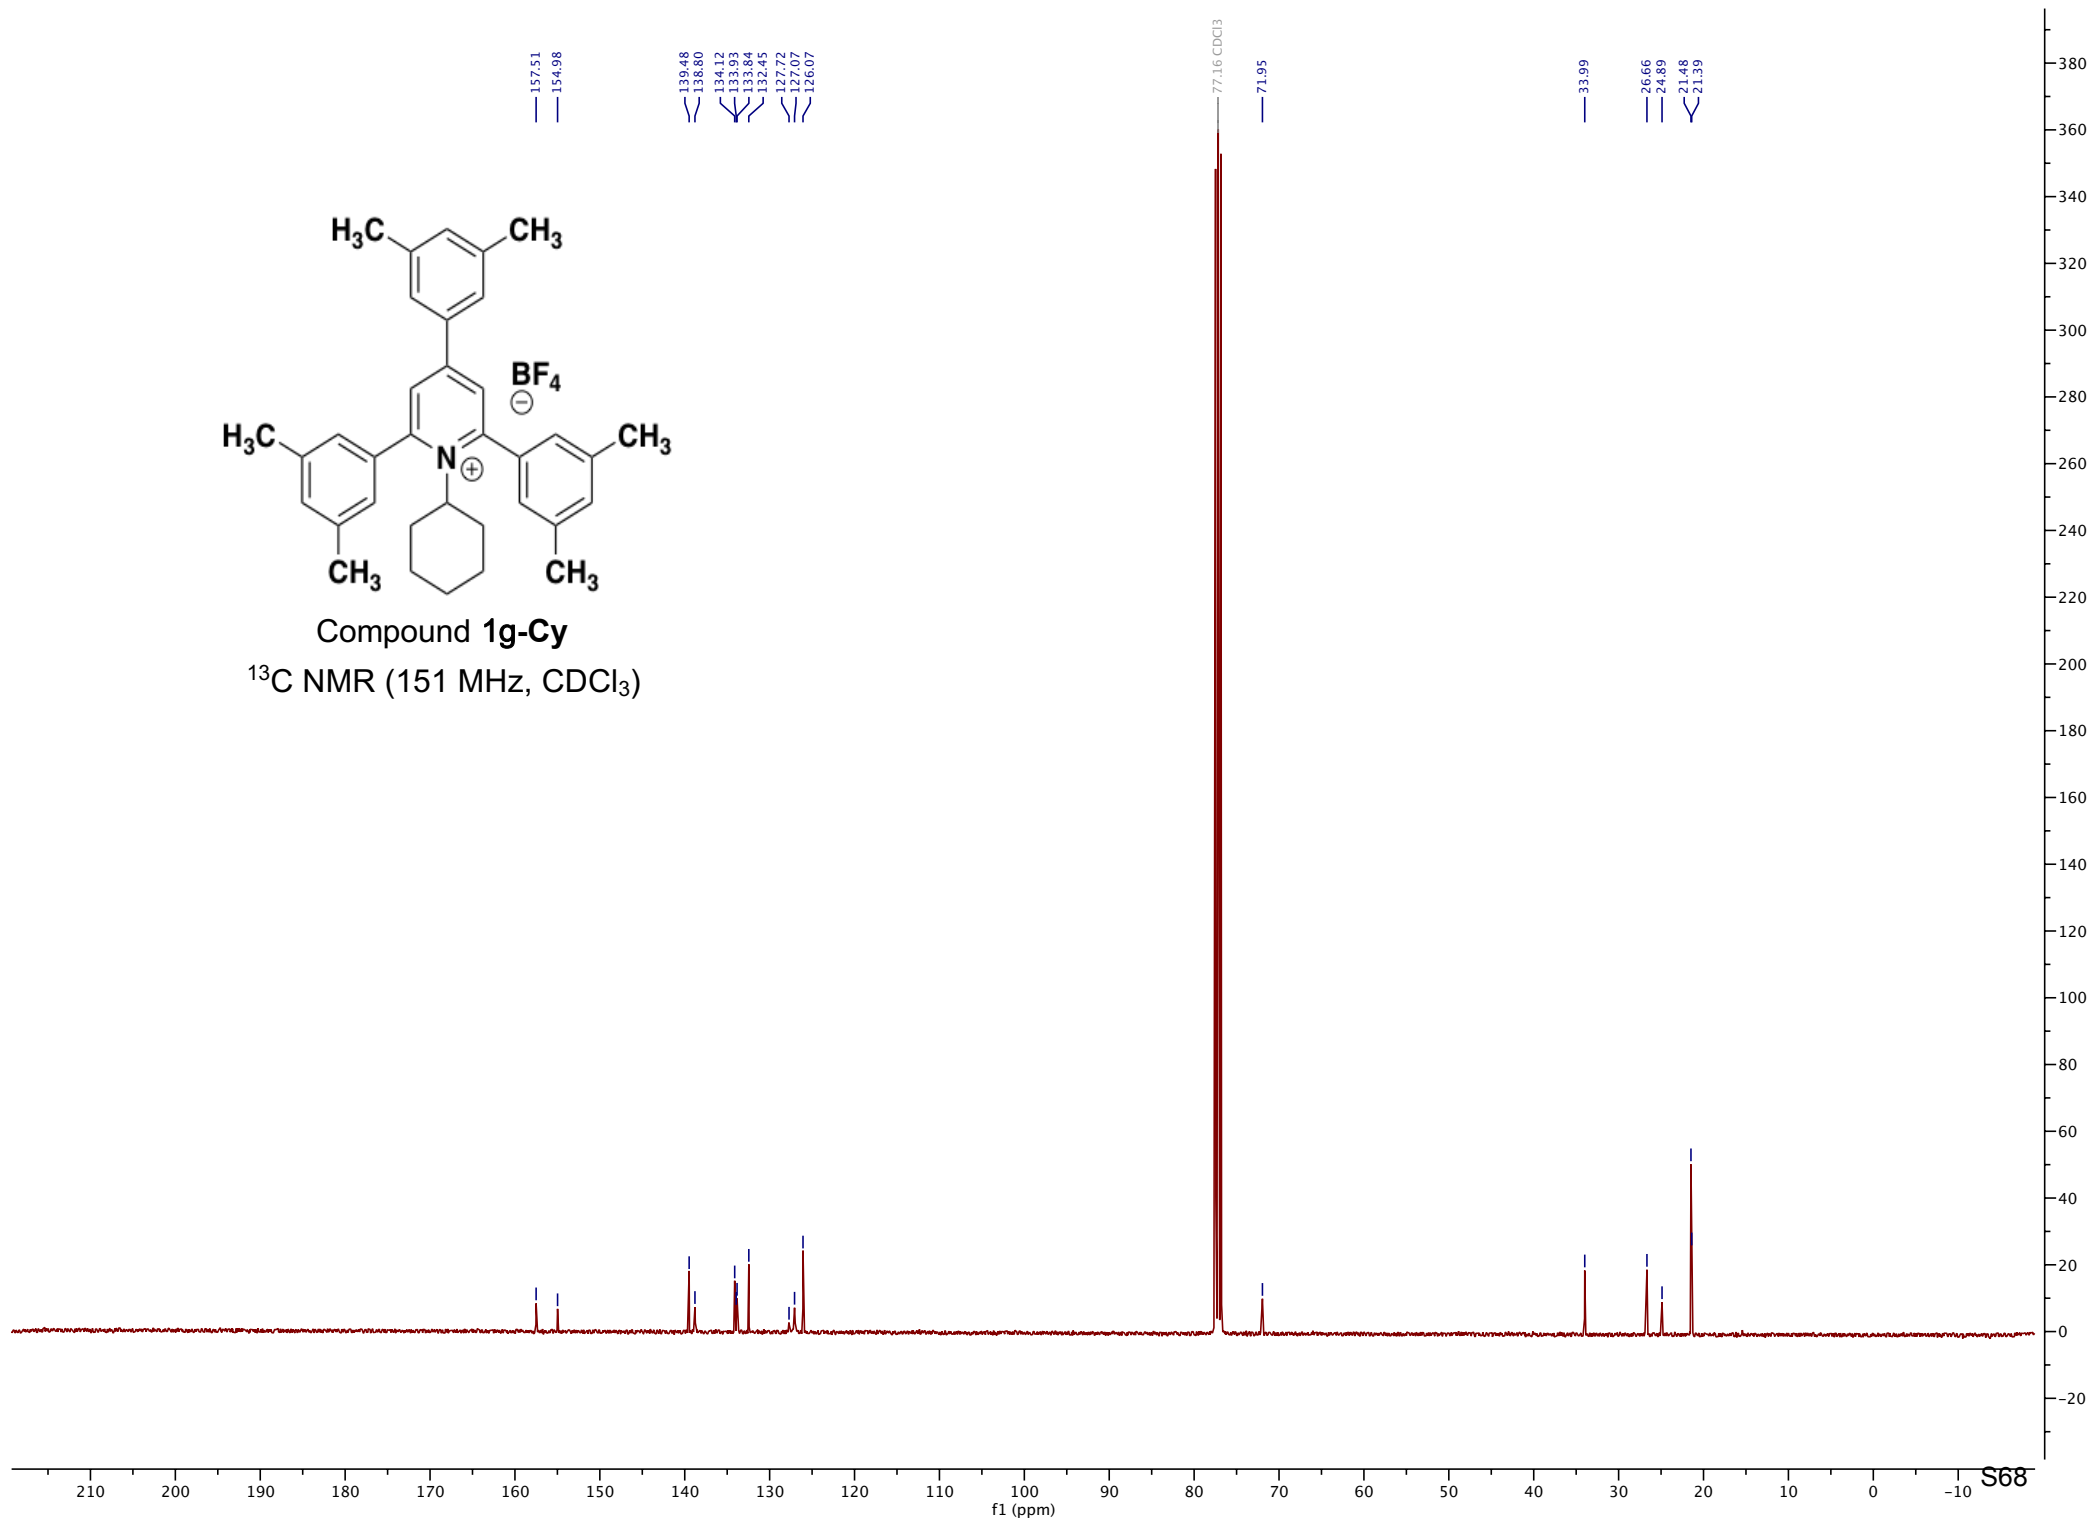



Compound 1g-Cy

<sup>19</sup>F NMR (376 MHz, CDCl<sub>3</sub>)

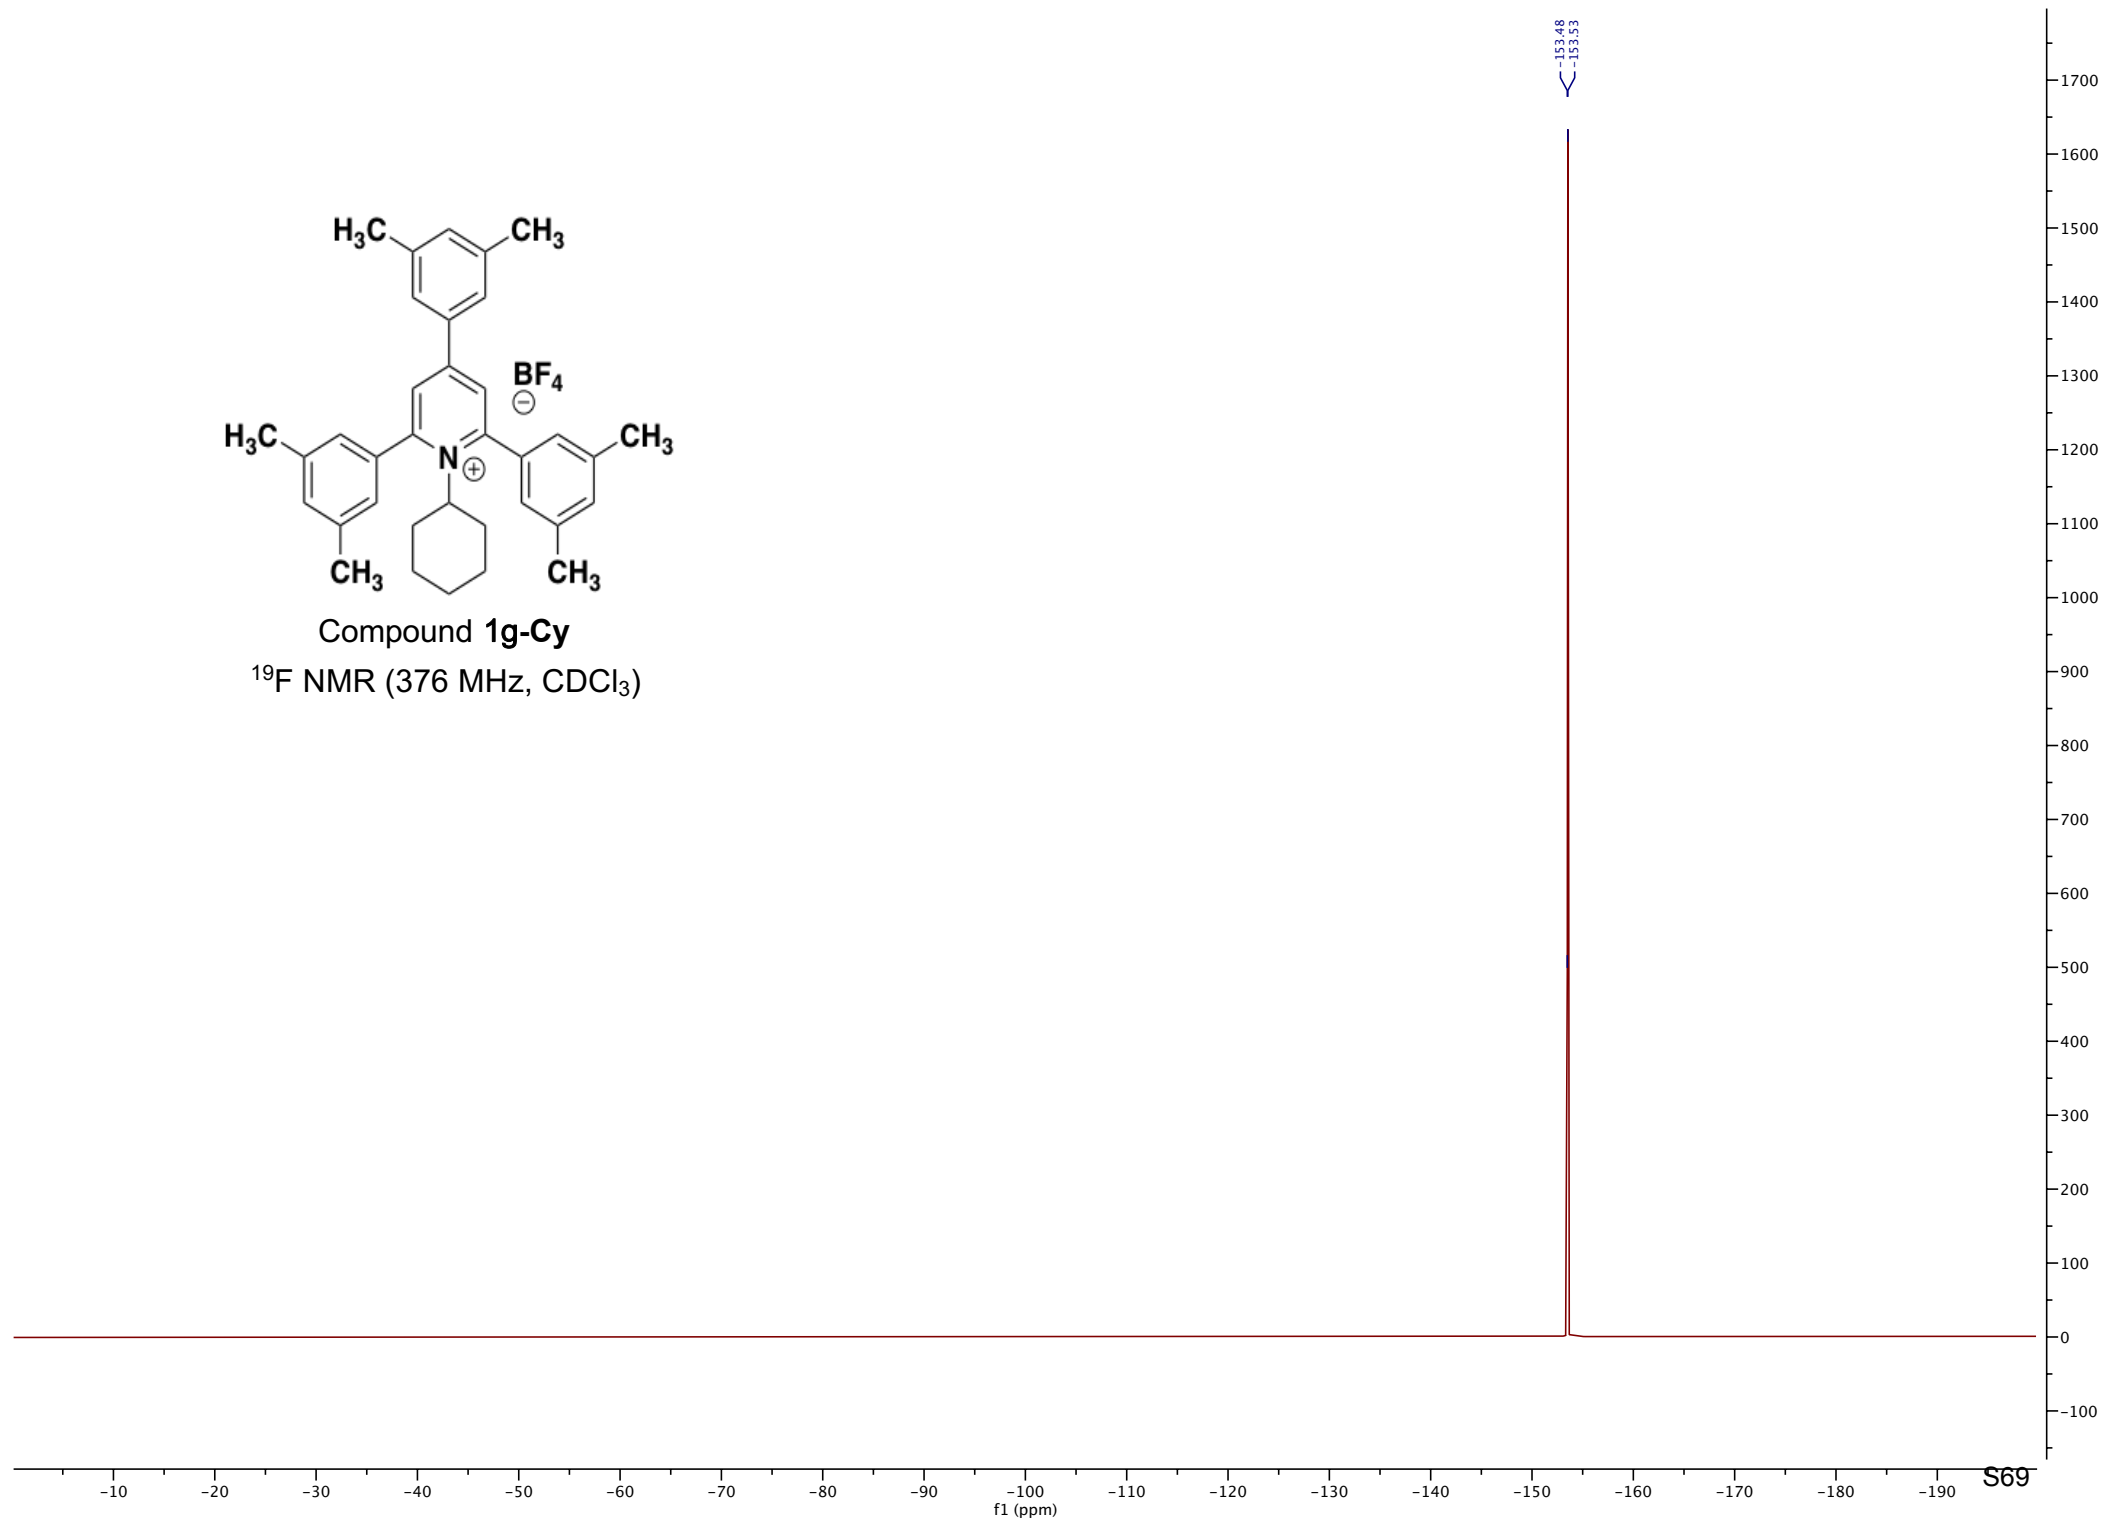

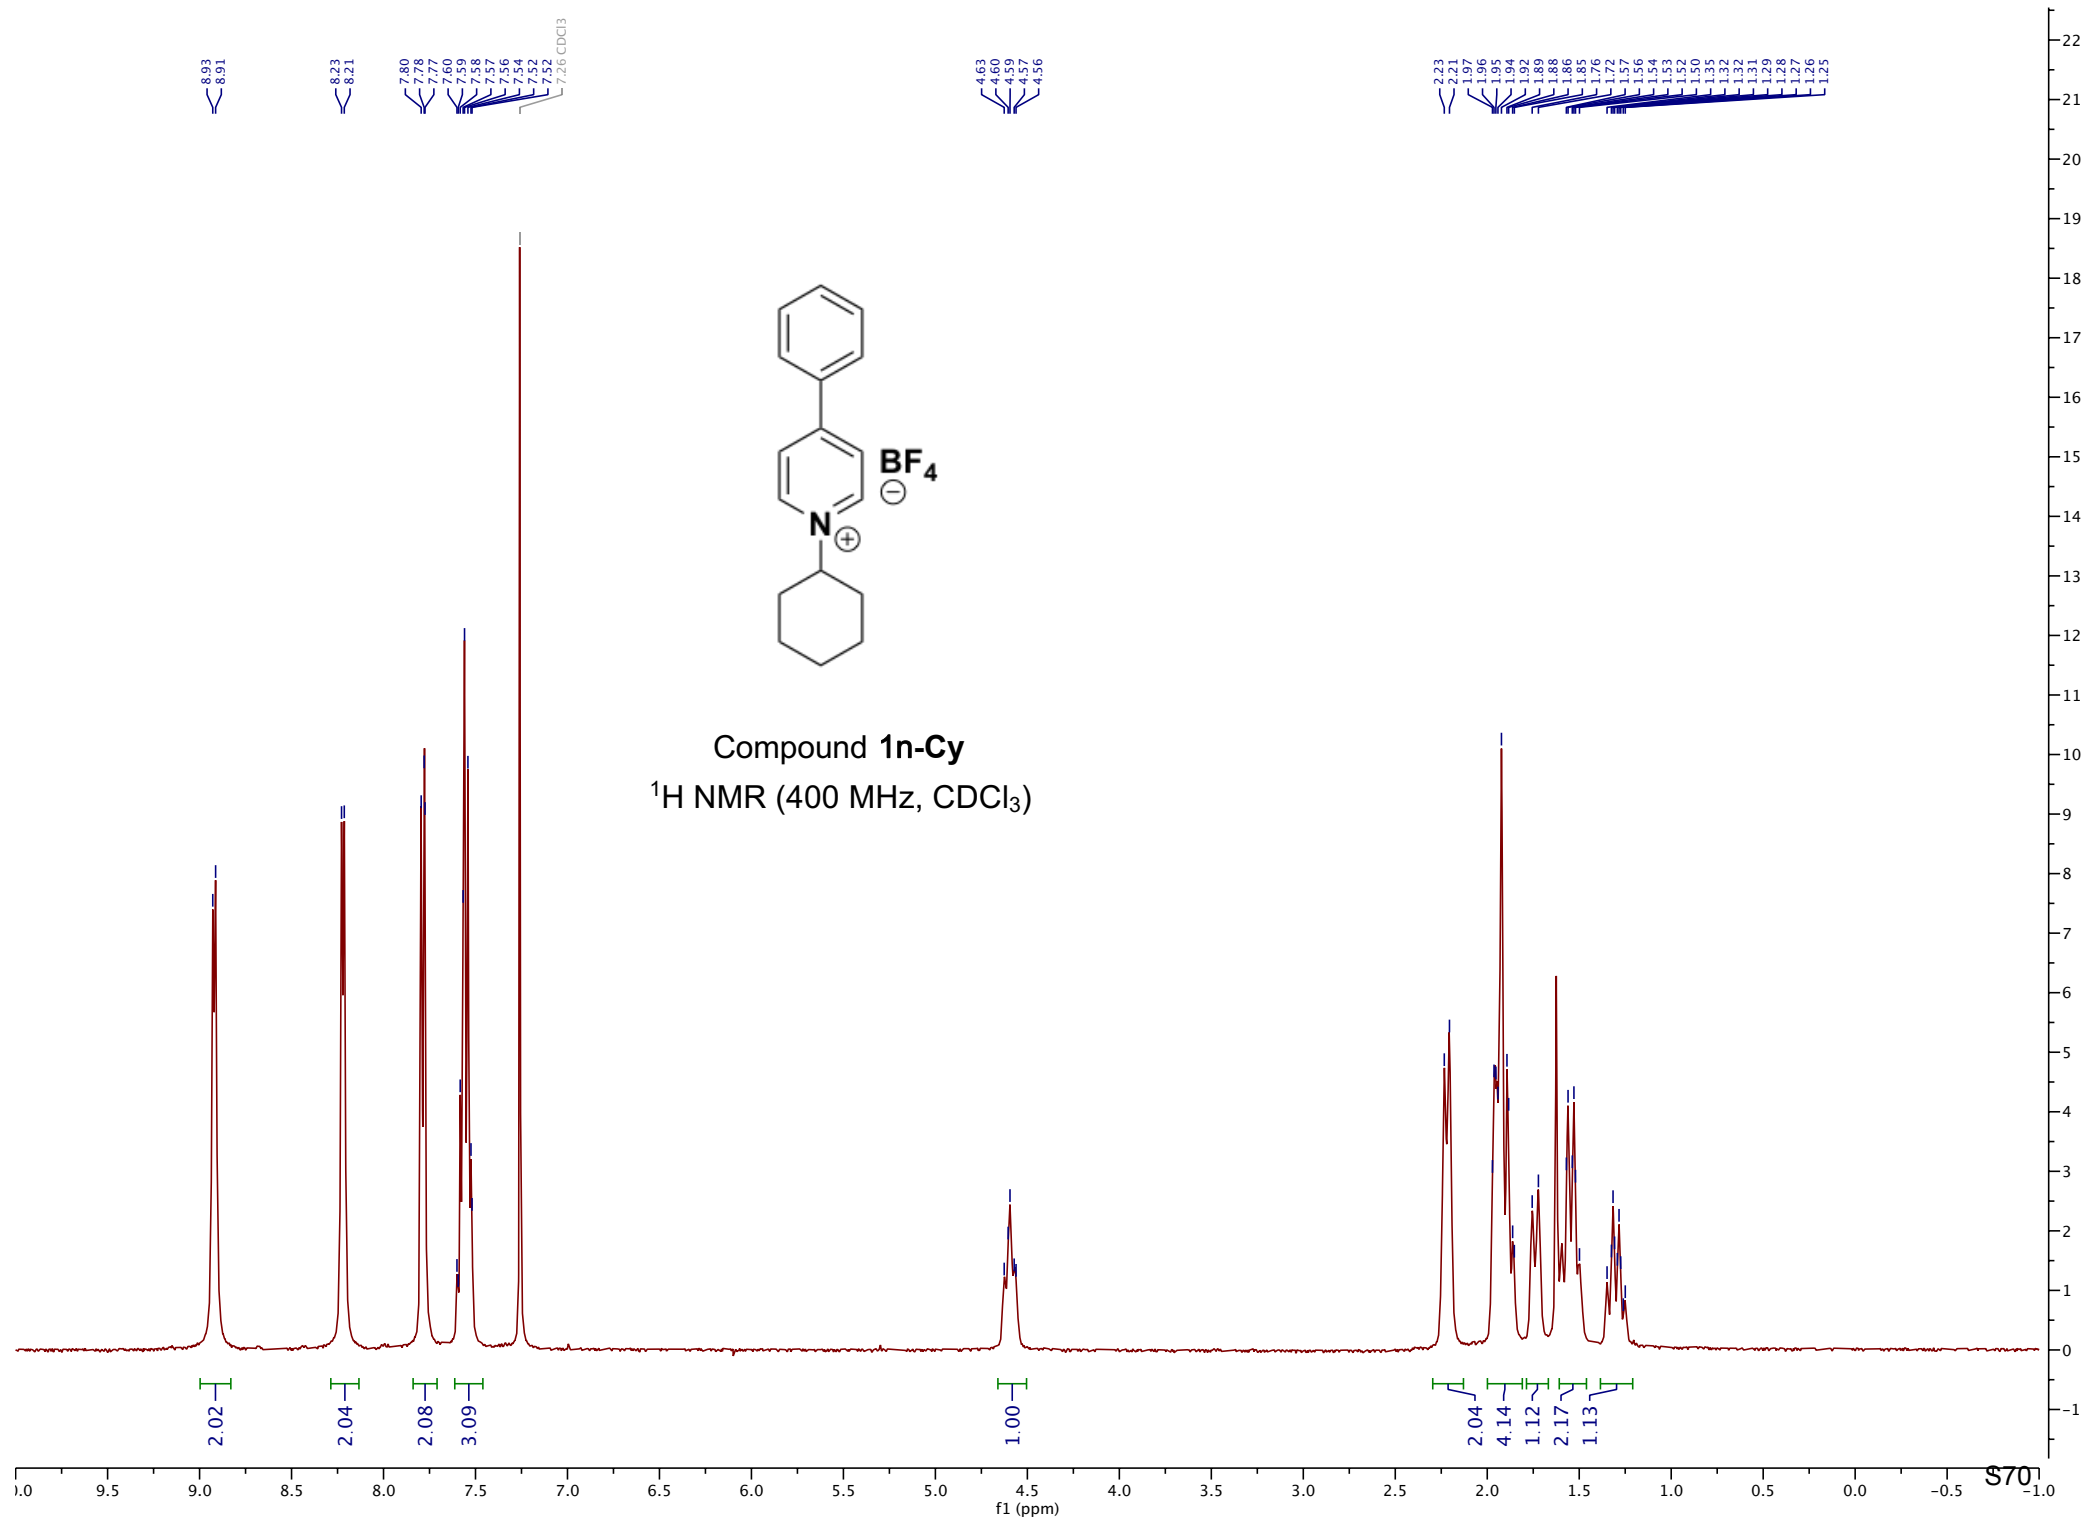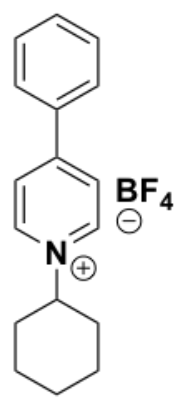

Compound 1n-Cy  
<sup>1</sup>H NMR (400 MHz, CDCl<sub>3</sub>)

8.93  
8.91

8.23  
8.21

7.80  
7.78  
7.77  
7.60  
7.59  
7.58  
7.57  
7.56  
7.54  
7.52  
7.26 CDCl<sub>3</sub>

4.63  
4.60  
4.59  
4.57  
4.56

2.23  
2.21  
1.97  
1.96  
1.95  
1.94  
1.92  
1.89  
1.88  
1.85  
1.85  
1.76  
1.72  
1.57  
1.56  
1.54  
1.53  
1.52  
1.39  
1.39  
1.32  
1.32  
1.31  
1.29  
1.28  
1.27  
1.26  
1.25

2.02

2.04

2.08

3.09

1.00

2.04

4.14

1.12

2.17

1.13

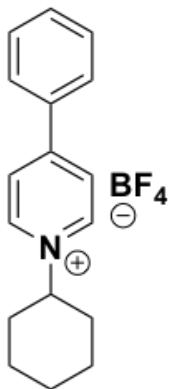

Compound 1n-Cy

<sup>13</sup>C NMR (101 MHz, CDCl<sub>3</sub>)

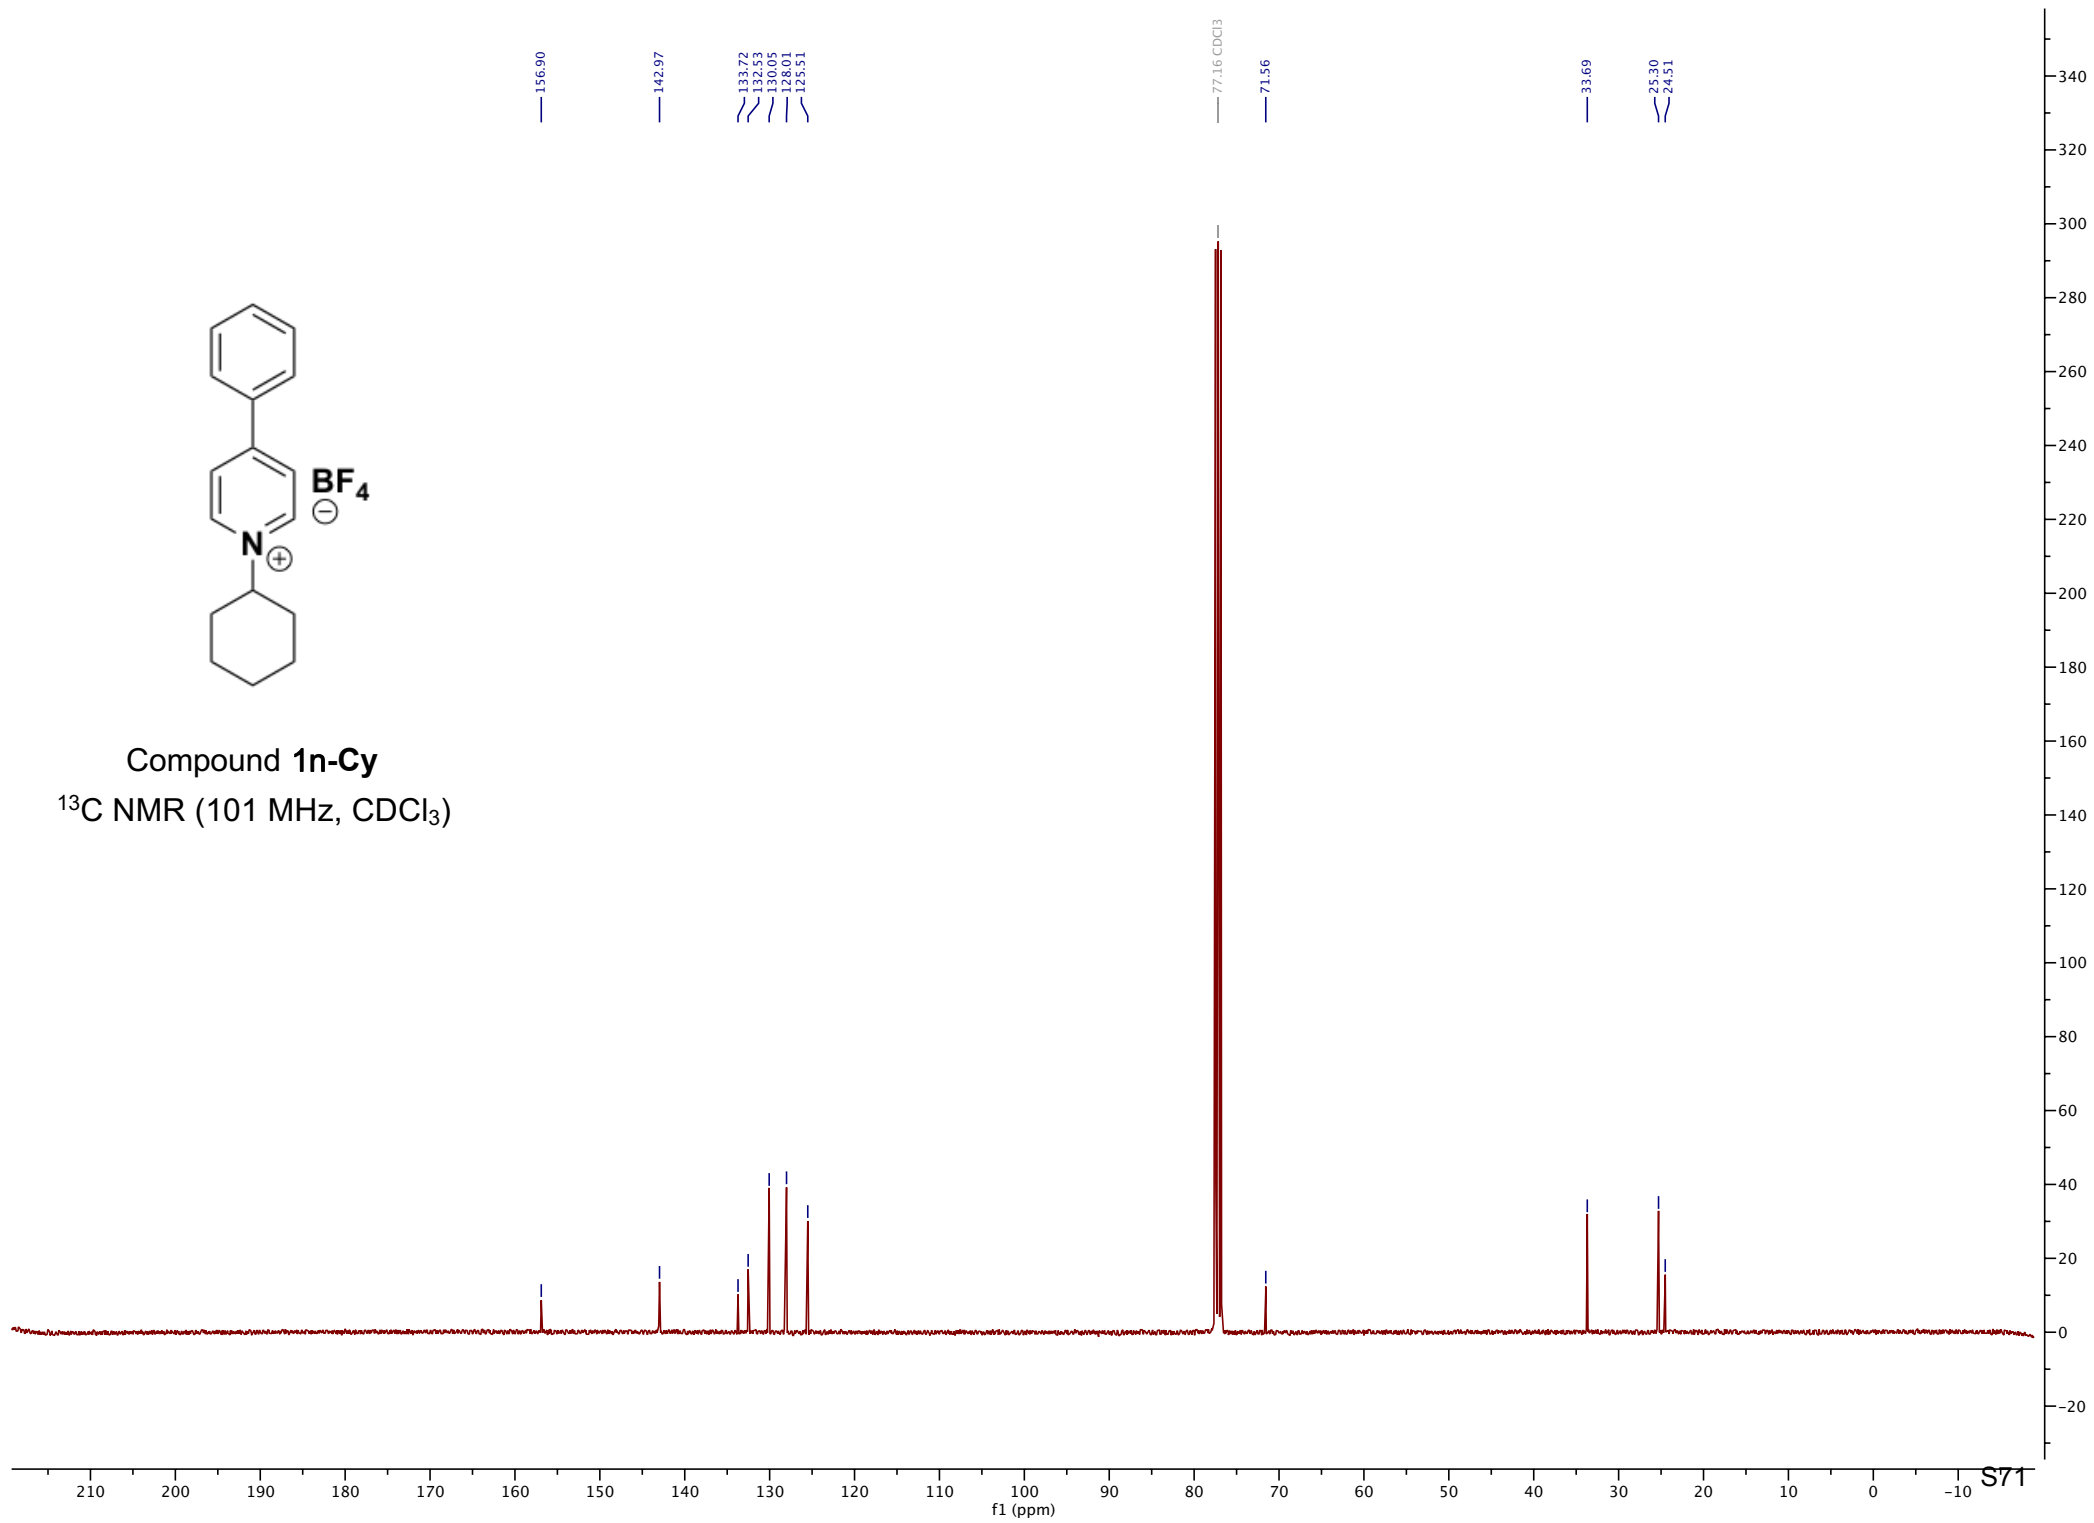



Compound 1n-Cy

<sup>19</sup>F NMR (376 MHz, CDCl<sub>3</sub>)

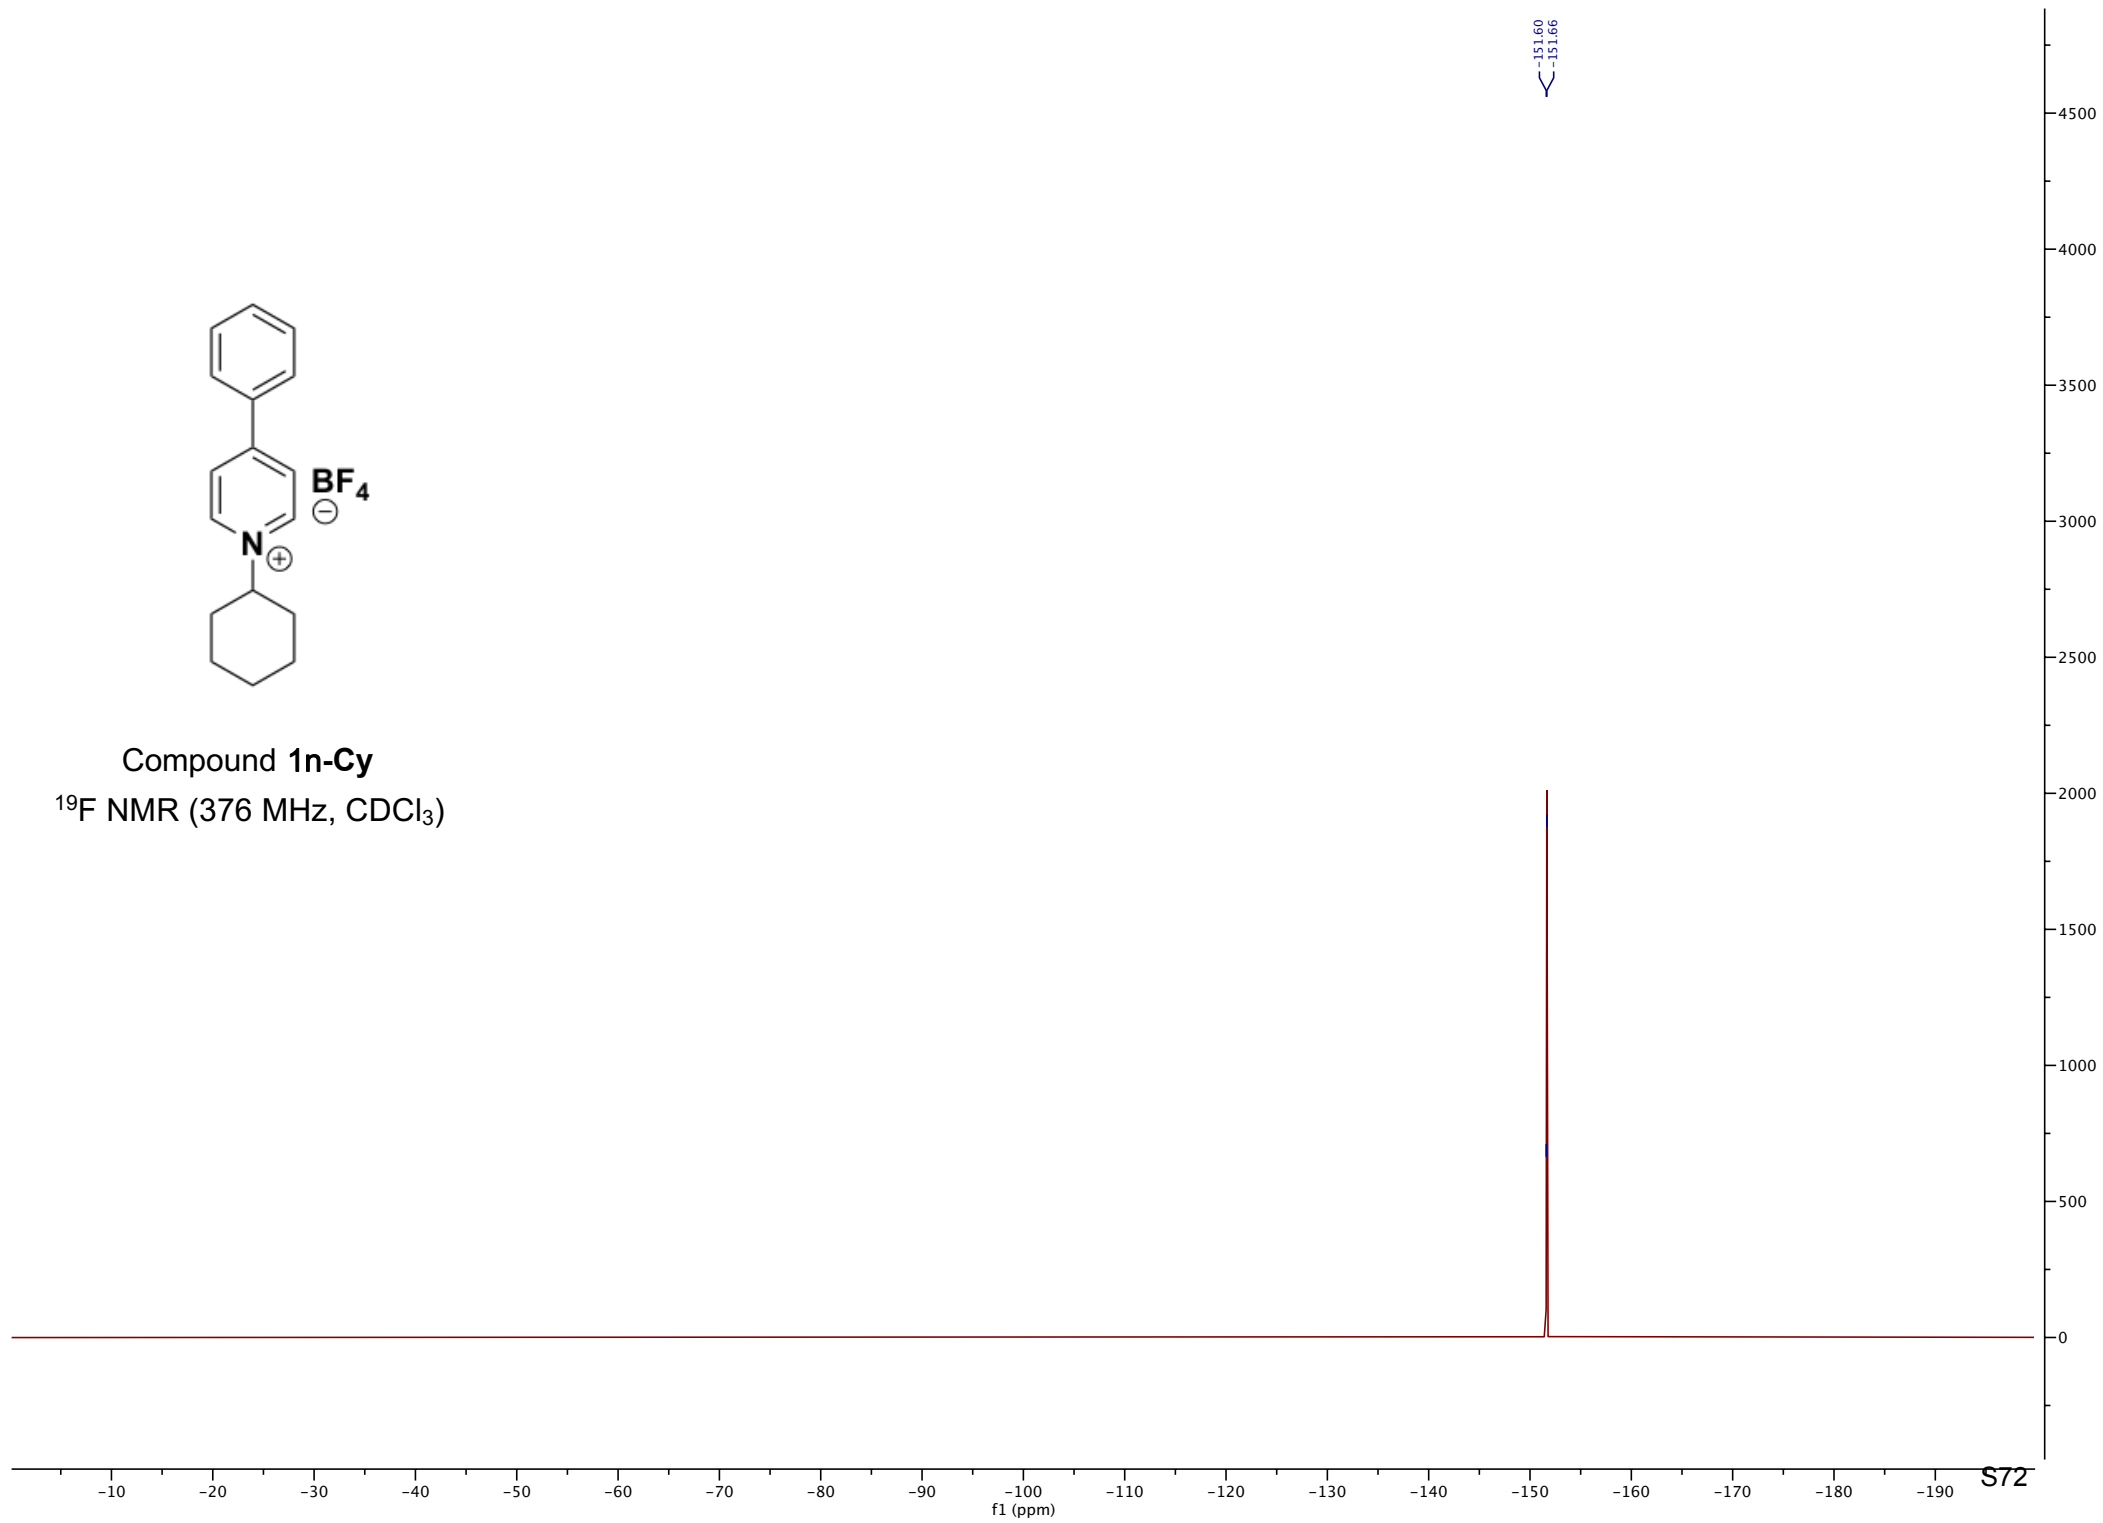

Supplement: NIHMS1720405-supplement-Supporting_Information.pdf [file NIHMS1720405-supplement-Supporting_Information.pdf]
